# Supplementary material for: Genome Survey and Transcriptome Analysis on Mycelia and Primordia of Agaricus blazei
Source: Biomed Res Int. 2020 Jan 13;2020:1824183. doi: 10.1155/2020/1824183 (PMC6983287; doi:10.1155/2020/1824183)
Supplement: Supplementary Materials — Supplementary information included 8 tables, and each of them has been named. Table S1 displayed primers used for qRT-PCR; Table S2, Agaricus blazei gene annotations; Table S3, carbohydrate-active enzyme (CAZy) annotation results; Table S4, the putative genes in beta-1,3 glucan and UDP-glucose biosynthesis; Table S5, the putative genes involved in biosynthesis of benzaldehyde and benzyl alcohol in Agaricus blazei; Table S6, list of novel transcripts identified from mycelium and primordium by RNA-Seq; Table S7, genes previously identified as important for vegetative growth and fruiting; Table S8, the expression information of selected genes for qRT-PCR in mycelium and primordium. [file 1824183.f1.zip]

Archive with 5 entries (2 files):
- supp.1824183/
- supp.1824183/Figures and Supplementary Information/
- supp.1824183/Figures and Supplementary Information/Supplementary Information/
- supp.1824183/Figures and Supplementary Information/Supplementary Information/Supplementary Information.xlsx
- supp.1824183/Figures and Supplementary Information/Supplementary Information/Table S.docx
