# Supplementary material for: Genome Survey and Transcriptome Analysis on Mycelia and Primordia of Agaricus blazei
Source: Biomed Res Int. 2020 Jan 13;2020:1824183. doi: 10.1155/2020/1824183 (PMC6983287; doi:10.1155/2020/1824183)
Supplement: Supplementary Materials — Supplementary information included 8 tables, and each of them has been named. Table S1 displayed primers used for qRT-PCR; Table S2, Agaricus blazei gene annotations; Table S3, carbohydrate-active enzyme (CAZy) annotation results; Table S4, the putative genes in beta-1,3 glucan and UDP-glucose biosynthesis; Table S5, the putative genes involved in biosynthesis of benzaldehyde and benzyl alcohol in Agaricus blazei; Table S6, list of novel transcripts identified from mycelium and primordium by RNA-Seq; Table S7, genes previously identified as important for vegetative growth and fruiting; Table S8, the expression information of selected genes for qRT-PCR in mycelium and primordium. [file 1824183.f1.zip › supp.1824183/Figures and Supplementary Information/Supplementary Information/Supplementary Information.xlsx]

## Sheet:  Table S2
Table S2 Agaricus blazei gene annotations
Gene_id	Locus	{nr}	{SwissProt}	{KEGG}	{KOG}	{GO}	{CAZy}
Annotation_num		8694	2102	8538	1620	6064	279
A00001	{CONTIG10:292:3829:-}	{NA}	{NA}	{NA}	{NA}	{NA}	{NA}
A00002	{CONTIG10:50627:52227:+}	{gi|568461749|ref|XP_006463027.1|; mitochondrial pyruvate dehydrogenase [Agaricus bisporus var. bisporus H97]}	{Q9P6P9; PDK_SCHPO [Pyruvate dehydrogenase (acetyl-transferring)] kinase, mitochondrial OS=Schizosaccharomyces pombe (strain 972 / ATCC 24843) GN=pkp1 PE=3 SV=1}	{abv:AGABI2DRAFT179568; K00898 PDK2_3_4 pyruvate dehydrogenase kinase 2/3/4 2.7.11.2 }	{SPAC644.11c; KOG0787 Dehydrogenase kinase T Signal transduction mechanisms ;}	{GO:0005524; ATP binding; molecular_function}	{NA}
A00003	{CONTIG10:329956:331757:+}	{gi|597988811|ref|XP_007331685.1|; hypothetical protein [Agaricus bisporus var. burnettii JB137-S8, AGABI1DRAFT_115081]}	{NA}	{abp:AGABI1DRAFT115081; }	{NA}	{GO:0003735; structural constituent of ribosome; molecular_function GO:0003723; RNA binding; molecular_function GO:0005840; ribosome; cellular_component GO:0006412; translation; biological_process GO:0016491; oxidoreductase activity; molecular_function GO:0008152; NA}	{NA}
A00004	{CONTIG10:332996:338434:+}	{gi|597970247|ref|XP_007327171.1|; hypothetical protein [Agaricus bisporus var. burnettii JB137-S8, AGABI1DRAFT_36466]}	{NA}	{abp:AGABI1DRAFT36466; }	{NA}	{GO:0006508; proteolysis; biological_process GO:0003724; RNA helicase activity; molecular_function GO:0005622; intracellular; cellular_component GO:0004198; calcium-dependent cysteine-type endopeptidase activity; molecular_function GO:0003723; RNA binding; molecular_function}	{NA}
A00005	{CONTIG10:341315:343220:+}	{gi|597991151|ref|XP_007332247.1|; hypothetical protein [Agaricus bisporus var. burnettii JB137-S8, AGABI1DRAFT_77728]}	{NA}	{abp:AGABI1DRAFT77728; }	{NA}	{GO:0016705; oxidoreductase activity, acting on paired donors, with incorporation or reduction of molecular oxygen; molecular_function GO:0005506; iron ion binding; molecular_function GO:0020037; heme binding; molecular_function GO:0055114; oxidation-reduction process; biological_process}	{NA}
A00006	{CONTIG10:345170:347222:+}	{gi|597998991|ref|XP_007334138.1|; hypothetical protein [Agaricus bisporus var. burnettii JB137-S8, AGABI1DRAFT_132446]}	{NA}	{abp:AGABI1DRAFT132446; }	{NA}	{GO:0005506; iron ion binding; molecular_function GO:0055114; oxidation-reduction process; biological_process GO:0020037; heme binding; molecular_function GO:0016705; oxidoreductase activity, acting on paired donors, with incorporation or reduction of molecular oxygen; molecular_function}	{NA}
A00007	{CONTIG10:347666:349652:-}	{gi|597988233|ref|XP_007331543.1|; hypothetical protein [Agaricus bisporus var. burnettii JB137-S8, AGABI1DRAFT_76892]}	{NA}	{abp:AGABI1DRAFT76892; }	{NA}	{GO:0050660; flavin adenine dinucleotide binding; molecular_function GO:0004499; flavin-containing monooxygenase activity; molecular_function GO:0016491; oxidoreductase activity; molecular_function GO:0050661; NADP binding; molecular_function GO:0016117; carotenoid biosynthetic process; biological_process GO:0055114; oxidation-reduction process; biological_process GO:0016705; oxidoreductase activ…	{NA}
A00008	{CONTIG10:352039:354176:-}	{gi|597988233|ref|XP_007331543.1|; hypothetical protein [Agaricus bisporus var. burnettii JB137-S8, AGABI1DRAFT_76892]}	{NA}	{abp:AGABI1DRAFT76892; }	{NA}	{GO:0004499; flavin-containing monooxygenase activity; molecular_function GO:0050661; NADP binding; molecular_function GO:0016491; oxidoreductase activity; molecular_function GO:0055114; oxidation-reduction process; biological_process GO:0050660; flavin adenine dinucleotide binding; molecular_function}	{NA}
A00009	{CONTIG10:355592:357657:-}	{gi|597988803|ref|XP_007331683.1|; hypothetical protein [Agaricus bisporus var. burnettii JB137-S8, AGABI1DRAFT_121903]}	{P38675; MET7_NEUCR Cystathionine gamma-synthase OS=Neurospora crassa (strain ATCC 24698 / 74-OR23-1A / CBS 708.71 / DSM 1257 / FGSC 987) GN=met-7 PE=3 SV=3}	{abp:AGABI1DRAFT121903; K01739 metB cystathionine gamma-synthase 2.5.1.48 Metabolism; Amino acid metabolism; Cysteine and methionine metabolism [PATH:ko00270] Metabolism; Metabolism of other amino acids; Selenocompound metabolism [PATH:ko00450] Metabolism; Energy metabolism; Sulfur metabolism [PATH:ko00920] }	{SPBC15D4.09c; KOG0053 Cystathionine beta-lyases/cystathionine gamma-synthases E Amino acid transport and metabolism ;}	{GO:0009058; biosynthetic process; biological_process GO:0030170; pyridoxal phosphate binding; molecular_function}	{NA}
A00010	{CONTIG10:358338:360261:-}	{gi|597988799|ref|XP_007331682.1|; hypothetical protein [Agaricus bisporus var. burnettii JB137-S8, AGABI1DRAFT_130133]}	{NA}	{abp:AGABI1DRAFT130133; }	{NA}	{GO:0030554; adenyl nucleotide binding; molecular_function}	{NA}
A00011	{CONTIG10:362910:364925:+}	{gi|576989263|gb|EUC61982.1|; reverse transcriptase/ribonuclease H, putative [Rhizoctonia solani AG-3 Rhs1AP]}	{NA}	{NA}	{NA}	{GO:0005515; protein binding; molecular_function}	{NA}
A00012	{CONTIG10:366300:367881:-}	{gi|597992767|ref|XP_007332625.1|; hypothetical protein [Agaricus bisporus var. burnettii JB137-S8, AGABI1DRAFT_122446]}	{NA}	{abp:AGABI1DRAFT122446; }	{NA}	{GO:0020037; heme binding; molecular_function GO:0055114; oxidation-reduction process; biological_process GO:0005506; iron ion binding; molecular_function GO:0016705; oxidoreductase activity, acting on paired donors, with incorporation or reduction of molecular oxygen; molecular_function}	{NA}
A00013	{CONTIG10:52560:54548:-}	{gi|598000735|ref|XP_007334546.1|; hypothetical protein AGABI1DRAFT_116718, partial [Agaricus bisporus var. burnettii JB137-S8]}	{NA}	{abp:AGABI1DRAFT116718; }	{NA}	{GO:0006355; regulation of transcription, DNA-dependent; biological_process GO:0007165; signal transduction; biological_process GO:0005515; protein binding; molecular_function GO:0004871; signal transducer activity; molecular_function}	{NA}
A00014	{CONTIG10:370246:372136:+}	{gi|597988233|ref|XP_007331543.1|; hypothetical protein [Agaricus bisporus var. burnettii JB137-S8, AGABI1DRAFT_76892]}	{NA}	{abp:AGABI1DRAFT76892; }	{NA}	{GO:0016117; carotenoid biosynthetic process; biological_process GO:0050661; NADP binding; molecular_function GO:0016491; oxidoreductase activity; molecular_function GO:0004499; flavin-containing monooxygenase activity; molecular_function GO:0050660; flavin adenine dinucleotide binding; molecular_function GO:0019354; siroheme biosynthetic process; biological_process GO:0048037; cofactor binding; …	{NA}
A00015	{CONTIG10:374697:375632:+}	{NA}	{NA}	{NA}	{NA}	{NA}	{NA}
A00016	{CONTIG10:376524:377201:+}	{gi|598003619|ref|XP_007335213.1|; hypothetical protein [Agaricus bisporus var. burnettii JB137-S8, AGABI1DRAFT_133582]}	{NA}	{abp:AGABI1DRAFT47753; }	{NA}	{GO:0003964; RNA-directed DNA polymerase activity; molecular_function GO:0003723; RNA binding; molecular_function GO:0006278; RNA-dependent DNA replication; biological_process}	{NA}
A00017	{CONTIG10:377691:378767:+}	{NA}	{NA}	{NA}	{NA}	{NA}	{NA}
A00018	{CONTIG10:383619:384151:-}	{gi|630364945|ref|XP_007871747.1|; hypothetical protein GLOTRDRAFT_51573, partial [Gloeophyllum trabeum ATCC 11539]}	{NA}	{NA}	{NA}	{NA}	{NA}
A00019	{CONTIG10:389422:390764:+}	{gi|568462022|ref|XP_006463116.1|; hypothetical protein [Agaricus bisporus var. bisporus H97, AGABI2DRAFT_186833]}	{B9W4V6; APO1_AGRAE Aromatic peroxygenase OS=Agrocybe aegerita GN=APO1 PE=1 SV=1}	{abv:AGABI2DRAFT186833; K21820 APO1 unspecific peroxygenase 1.11.2.1 }	{NA}	{GO:0004601; peroxidase activity; molecular_function}	{NA}
A00020	{CONTIG10:392337:392744:-}	{NA}	{NA}	{NA}	{NA}	{NA}	{NA}
A00021	{CONTIG10:399491:400379:-}	{NA}	{NA}	{NA}	{NA}	{NA}	{NA}
A00022	{CONTIG10:402104:403015:+}	{NA}	{NA}	{NA}	{NA}	{NA}	{NA}
A00023	{CONTIG10:405551:406863:+}	{NA}	{NA}	{NA}	{NA}	{NA}	{NA}
A00024	{CONTIG10:55481:56326:-}	{gi|568461755|ref|XP_006463029.1|; hypothetical protein [Agaricus bisporus var. bisporus H97, AGABI2DRAFT_137621]}	{P41805; RL10_YEAST 60S ribosomal protein L10 OS=Saccharomyces cerevisiae (strain ATCC 204508 / S288c) GN=RPL10 PE=1 SV=1}	{abv:AGABI2DRAFT137621; K02866 RP-L10e, RPL10 large subunit ribosomal protein L10e -- Genetic Information Processing; Translation; Ribosome [PATH:ko03010] }	{YLR075w; KOG0857 60s ribosomal protein L10 J Translation, ribosomal structure and biogenesis ;}	{GO:0006412; translation; biological_process GO:0005840; ribosome; cellular_component GO:0003735; structural constituent of ribosome; molecular_function}	{NA}
A00025	{CONTIG10:408252:410617:+}	{gi|597999593|ref|XP_007334278.1|; hypothetical protein AGABI1DRAFT_47004, partial [Agaricus bisporus var. burnettii JB137-S8]}	{NA}	{abp:AGABI1DRAFT47004; }	{NA}	{NA}	{NA}
A00026	{CONTIG10:410984:411568:+}	{gi|597981253|ref|XP_007329845.1|; hypothetical protein [Agaricus bisporus var. burnettii JB137-S8, AGABI1DRAFT_91720]}	{NA}	{abp:AGABI1DRAFT91720; }	{NA}	{NA}	{NA}
A00027	{CONTIG10:412815:414584:-}	{gi|597988233|ref|XP_007331543.1|; hypothetical protein [Agaricus bisporus var. burnettii JB137-S8, AGABI1DRAFT_76892]}	{NA}	{abp:AGABI1DRAFT76892; }	{NA}	{GO:0050660; flavin adenine dinucleotide binding; molecular_function GO:0055114; oxidation-reduction process; biological_process GO:0016491; oxidoreductase activity; molecular_function GO:0050661; NADP binding; molecular_function GO:0004499; flavin-containing monooxygenase activity; molecular_function}	{NA}
A00028	{CONTIG10:424339:426307:+}	{gi|568461992|ref|XP_006463106.1|; hypothetical protein [Agaricus bisporus var. bisporus H97, AGABI2DRAFT_119934]}	{NA}	{abv:AGABI2DRAFT119934; }	{NA}	{GO:0005537; mannose binding; molecular_function GO:0050690; regulation of defense response to virus by virus; biological_process}	{NA}
A00029	{CONTIG10:431298:432692:+}	{gi|568461992|ref|XP_006463106.1|; hypothetical protein [Agaricus bisporus var. bisporus H97, AGABI2DRAFT_119934]}	{NA}	{abv:AGABI2DRAFT119934; }	{NA}	{GO:0006468; protein phosphorylation; biological_process GO:0004672; protein kinase activity; molecular_function GO:0005524; ATP binding; molecular_function}	{NA}
A00030	{CONTIG10:438936:439211:+}	{gi|568462047|ref|XP_006463124.1|; hypothetical protein [Agaricus bisporus var. bisporus H97, AGABI2DRAFT_119949]}	{NA}	{abv:AGABI2DRAFT119949; }	{NA}	{NA}	{NA}
A00031	{CONTIG10:444937:445526:+}	{NA}	{NA}	{NA}	{NA}	{GO:0006810; transport; biological_process GO:0016021; integral to membrane; cellular_component GO:0005886; plasma membrane; cellular_component}	{NA}
A00032	{CONTIG10:451510:454503:-}	{gi|598001541|ref|XP_007334745.1|; hypothetical protein [Agaricus bisporus var. burnettii JB137-S8, AGABI1DRAFT_116817]}	{Q8VXZ7; AGAL3_ARATH Alpha-galactosidase 3 OS=Arabidopsis thaliana GN=AGAL3 PE=1 SV=1}	{abp:AGABI1DRAFT116817; K07407 E3.2.1.22B, galA, rafA alpha-galactosidase 3.2.1.22 Metabolism; Carbohydrate metabolism; Galactose metabolism [PATH:ko00052] Metabolism; Lipid metabolism; Glycerolipid metabolism [PATH:ko00561] Metabolism; Lipid metabolism; Sphingolipid metabolism [PATH:ko00600] Metabolism; Glycan biosynthesis and metabolism; Glycosphingolipid biosynthesis - globo and isoglobo serie…	{At3g56310; KOG2366 Alpha-D-galactosidase (melibiase) G Carbohydrate transport and metabolism ;}	{GO:0005975; carbohydrate metabolic process; biological_process GO:0004553; hydrolase activity, hydrolyzing O-glycosyl compounds; molecular_function}	{CDJ79834.1_GH27; {&alpha;-galactosidase (Agl1);--;Leucoagaricus gongylophorus Ae322;--} &alpha;-galactosidase (EC 3.2.1.22); &alpha;-N-acetylgalactosaminidase (EC 3.2.1.49); isomalto-dextranase (EC 3.2.1.94); &beta;-L-arabinopyranosidase (EC 3.2.1.88); galactan:galactan galactosyltransferase (EC 2.4.1.-) Mechanistic commonality with family GH36 demonstrated by Comfort et al. (2007) Biochemistry …
A00033	{CONTIG10:456555:457826:-}	{gi|568457308|ref|XP_006461552.1|; hypothetical protein [Agaricus bisporus var. bisporus H97, AGABI2DRAFT_205341]}	{NA}	{abv:AGABI2DRAFT205341; }	{NA}	{GO:0003723; RNA binding; molecular_function GO:0003724; RNA helicase activity; molecular_function}	{NA}
A00034	{CONTIG10:460175:460897:+}	{NA}	{NA}	{NA}	{NA}	{NA}	{NA}
A00035	{CONTIG10:57451:57900:+}	{gi|568461758|ref|XP_006463030.1|; hypothetical protein [Agaricus bisporus var. bisporus H97, AGABI2DRAFT_119840]}	{NA}	{abp:AGABI1DRAFT132846; }	{NA}	{NA}	{NA}
A00036	{CONTIG10:462783:465829:-}	{gi|597971085|ref|XP_007327374.1|; hypothetical protein [Agaricus bisporus var. burnettii JB137-S8, AGABI1DRAFT_125839]}	{NA}	{abp:AGABI1DRAFT125839; }	{NA}	{GO:0019079; viral genome replication; biological_process GO:0043531; ADP binding; molecular_function}	{NA}
A00037	{CONTIG10:466340:467146:-}	{gi|568438800|ref|XP_006455404.1|; hypothetical protein [Agaricus bisporus var. bisporus H97, AGABI2DRAFT_75630]}	{NA}	{abv:AGABI2DRAFT75630; }	{NA}	{NA}	{NA}
A00038	{CONTIG10:467313:467933:-}	{NA}	{NA}	{NA}	{NA}	{NA}	{NA}
A00039	{CONTIG10:469006:470866:-}	{gi|597999239|ref|XP_007334199.1|; hypothetical protein [Agaricus bisporus var. burnettii JB137-S8, AGABI1DRAFT_123344]}	{NA}	{abp:AGABI1DRAFT123344; }	{NA}	{GO:0016021; integral to membrane; cellular_component GO:0055085; transmembrane transport; biological_process}	{NA}
A00040	{CONTIG10:471855:474062:+}	{gi|568462221|ref|XP_006463180.1|; hypothetical protein [Agaricus bisporus var. bisporus H97, AGABI2DRAFT_120008]}	{D4ANU4; LYS_ARTBC N,O-diacetylmuramidase OS=Arthroderma benhamiae (strain ATCC MYA-4681 / CBS 112371) GN=ARB_05911 PE=1 SV=1}	{abv:AGABI2DRAFT120008; }	{NA}	{GO:0003796; lysozyme activity; molecular_function GO:0006355; regulation of transcription, DNA-dependent; biological_process GO:0016998; cell wall macromolecule catabolic process; biological_process GO:0009253; peptidoglycan catabolic process; biological_process}	{CAP86879.1_GH25; {Pc20g15500;--;Penicillium chrysogenum Wisconsin 54-1255 (PenchWisc1_1);B6HE04} lysozyme (EC 3.2.1.17) NA}
A00041	{CONTIG10:474669:476577:-}	{gi|568462215|ref|XP_006463178.1|; hypothetical protein [Agaricus bisporus var. bisporus H97, AGABI2DRAFT_207832]}	{NA}	{abv:AGABI2DRAFT207832; K17842 carT, CAO-2 torulene dioxygenase 1.13.11.59 Metabolism; Metabolism of terpenoids and polyketides; Carotenoid biosynthesis [PATH:ko00906] }	{NA}	{NA}	{NA}
A00042	{CONTIG10:476816:477342:-}	{gi|597999255|ref|XP_007334203.1|; hypothetical protein [Agaricus bisporus var. burnettii JB137-S8, AGABI1DRAFT_80275]}	{O42661; SMD1_SCHPO Small nuclear ribonucleoprotein Sm D1 OS=Schizosaccharomyces pombe (strain 972 / ATCC 24843) GN=smd1 PE=1 SV=1}	{abp:AGABI1DRAFT80275; K11087 SNRPD1, SMD1 small nuclear ribonucleoprotein D1 -- Genetic Information Processing; Transcription; Spliceosome [PATH:ko03040] Human Diseases; Immune diseases; Systemic lupus erythematosus [PATH:ko05322] }	{SPAC27D7.07c; KOG3428 Small nuclear ribonucleoprotein SMD1 and related snRNPs A RNA processing and modification ;}	{GO:0006464; protein modification process; biological_process}	{NA}
A00043	{CONTIG10:477724:481691:+}	{gi|568462203|ref|XP_006463176.1|; hypothetical protein [Agaricus bisporus var. bisporus H97, AGABI2DRAFT_194086]}	{Q5REP4; KIF22_PONAB Kinesin-like protein KIF22 OS=Pongo abelii GN=KIF22 PE=2 SV=1}	{abv:AGABI2DRAFT194086; K10403 KIF22 kinesin family member 22 -- Organismal Systems; Endocrine system; Progesterone-mediated oocyte maturation [PATH:ko04914] }	{NA}	{GO:0003777; microtubule motor activity; molecular_function GO:0007018; microtubule-based movement; biological_process GO:0005524; ATP binding; molecular_function GO:0006364; rRNA processing; biological_process GO:0008017; microtubule binding; molecular_function GO:0005730; nucleolus; cellular_component GO:0006457; protein folding; biological_process GO:0005515; protein binding; molecular_functio…	{NA}
A00044	{CONTIG10:491665:492840:-}	{gi|568462194|ref|XP_006463173.1|; hypothetical protein [Agaricus bisporus var. bisporus H97, AGABI2DRAFT_207822]}	{NA}	{abv:AGABI2DRAFT207822; }	{NA}	{GO:0009790; embryo development; biological_process GO:0003924; GTPase activity; molecular_function GO:0005525; GTP binding; molecular_function}	{NA}
A00045	{CONTIG10:504853:507077:+}	{gi|568457275|ref|XP_006461541.1|; hypothetical protein [Agaricus bisporus var. bisporus H97, AGABI2DRAFT_118419]}	{NA}	{abv:AGABI2DRAFT118419; }	{NA}	{GO:0043531; ADP binding; molecular_function}	{NA}
A00046	{CONTIG10:59403:60267:+}	{gi|568461761|ref|XP_006463031.1|; hypothetical protein [Agaricus bisporus var. bisporus H97, AGABI2DRAFT_119841]}	{NA}	{abv:AGABI2DRAFT119841; }	{NA}	{GO:0004017; adenylate kinase activity; molecular_function}	{NA}
A00047	{CONTIG10:507611:509278:+}	{gi|597971085|ref|XP_007327374.1|; hypothetical protein [Agaricus bisporus var. burnettii JB137-S8, AGABI1DRAFT_125839]}	{NA}	{abp:AGABI1DRAFT125839; }	{NA}	{GO:0019079; viral genome replication; biological_process GO:0043531; ADP binding; molecular_function}	{NA}
A00048	{CONTIG10:510689:515954:+}	{gi|597971037|ref|XP_007327363.1|; hypothetical protein [Agaricus bisporus var. burnettii JB137-S8, AGABI1DRAFT_125822]}	{NA}	{abv:AGABI2DRAFT118419; }	{NA}	{GO:0003723; RNA binding; molecular_function GO:0005524; ATP binding; molecular_function GO:0019079; viral genome replication; biological_process GO:0043531; ADP binding; molecular_function GO:0003724; RNA helicase activity; molecular_function}	{NA}
A00049	{CONTIG10:516656:519010:+}	{gi|568457275|ref|XP_006461541.1|; hypothetical protein [Agaricus bisporus var. bisporus H97, AGABI2DRAFT_118419]}	{NA}	{abv:AGABI2DRAFT118419; }	{NA}	{GO:0043531; ADP binding; molecular_function GO:0019079; viral genome replication; biological_process}	{NA}
A00050	{CONTIG10:519669:522029:+}	{gi|568457275|ref|XP_006461541.1|; hypothetical protein [Agaricus bisporus var. bisporus H97, AGABI2DRAFT_118419]}	{NA}	{abv:AGABI2DRAFT118419; }	{NA}	{GO:0043531; ADP binding; molecular_function GO:0019079; viral genome replication; biological_process}	{NA}
A00051	{CONTIG10:522555:522837:+}	{NA}	{NA}	{NA}	{NA}	{NA}	{NA}
A00052	{CONTIG10:524799:525108:+}	{NA}	{NA}	{NA}	{NA}	{NA}	{NA}
A00053	{CONTIG10:525849:528223:+}	{gi|597971085|ref|XP_007327374.1|; hypothetical protein [Agaricus bisporus var. burnettii JB137-S8, AGABI1DRAFT_125839]}	{NA}	{abp:AGABI1DRAFT125839; }	{NA}	{GO:0043531; ADP binding; molecular_function GO:0019079; viral genome replication; biological_process}	{NA}
A00054	{CONTIG10:528546:533605:+}	{gi|597971085|ref|XP_007327374.1|; hypothetical protein [Agaricus bisporus var. burnettii JB137-S8, AGABI1DRAFT_125839]}	{NA}	{abp:AGABI1DRAFT125839; }	{NA}	{GO:0005524; ATP binding; molecular_function GO:0003723; RNA binding; molecular_function GO:0019079; viral genome replication; biological_process GO:0005525; GTP binding; molecular_function GO:0003724; RNA helicase activity; molecular_function GO:0043531; ADP binding; molecular_function}	{NA}
A00055	{CONTIG10:534022:538940:+}	{gi|597999227|ref|XP_007334196.1|; hypothetical protein [Agaricus bisporus var. burnettii JB137-S8, AGABI1DRAFT_132509]}	{NA}	{abp:AGABI1DRAFT132509; K12373 HEXA_B hexosaminidase 3.2.1.52 Metabolism; Glycan biosynthesis and metabolism; Other glycan degradation [PATH:ko00511] Metabolism; Glycan biosynthesis and metabolism; Various types of N-glycan biosynthesis [PATH:ko00513] Metabolism; Carbohydrate metabolism; Amino sugar and nucleotide sugar metabolism [PATH:ko00520] Metabolism; Glycan biosynthesis and metabolism; Gly…	{NA}	{GO:0005975; carbohydrate metabolic process; biological_process GO:0004553; hydrolase activity, hydrolyzing O-glycosyl compounds; molecular_function GO:0043531; ADP binding; molecular_function}	{BAM42836.1_GH20; {N-acetylhexosaminidase (LeHex20A) (Hex20A);3.2.1.52;;Lentinula edodes H600;--} &beta;-hexosaminidase (EC 3.2.1.52); lacto-N-biosidase (EC 3.2.1.140); &beta;-1,6-N-acetylglucosaminidase) (EC 3.2.1.-); &beta;-6-SO3-N-acetylglucosaminidase (EC 3.2.1.-) NA}
A00056	{CONTIG10:542750:543471:+}	{gi|568462236|ref|XP_006463185.1|; hypothetical protein [Agaricus bisporus var. bisporus H97, AGABI2DRAFT_224842]}	{NA}	{abv:AGABI2DRAFT224842; }	{NA}	{GO:0006468; protein phosphorylation; biological_process GO:0004672; protein kinase activity; molecular_function GO:0005524; ATP binding; molecular_function}	{NA}
A00057	{CONTIG10:61495:65147:-}	{gi|598000755|ref|XP_007334551.1|; hypothetical protein [Agaricus bisporus var. burnettii JB137-S8, AGABI1DRAFT_132849]}	{NA}	{abp:AGABI1DRAFT132849; K20408 WDR24 WD repeat-containing protein 24 -- Environmental Information Processing; Signal transduction; mTOR signaling pathway [PATH:ko04150] }	{NA}	{GO:0005515; protein binding; molecular_function}	{NA}
A00058	{CONTIG10:553128:555612:+}	{gi|568462244|ref|XP_006463188.1|; hypothetical protein [Agaricus bisporus var. bisporus H97, AGABI2DRAFT_120013]}	{NA}	{abv:AGABI2DRAFT120013; }	{NA}	{GO:0046872; metal ion binding; molecular_function}	{NA}
A00059	{CONTIG10:558378:560174:-}	{gi|568461698|ref|XP_006463010.1|; hypothetical protein AGABI2DRAFT_41510, partial [Agaricus bisporus var. bisporus H97]}	{NA}	{abv:AGABI2DRAFT41510; }	{NA}	{GO:0005524; ATP binding; molecular_function GO:0016020; membrane; cellular_component GO:0004672; protein kinase activity; molecular_function GO:0016773; phosphotransferase activity, alcohol group as acceptor; molecular_function GO:0003824; NA GO:0009103; lipopolysaccharide biosynthetic process; biological_process GO:0006468; protein phosphorylation; biological_process}	{NA}
A00060	{CONTIG10:570231:571128:+}	{gi|238598690|ref|XP_002394674.1|; hypothetical protein [Moniliophthora perniciosa FA553, MPER_05398]}	{NA}	{mpr:MPER_05398; }	{NA}	{GO:0006810; transport; biological_process}	{NA}
A00061	{CONTIG10:571635:572969:+}	{gi|597988269|ref|XP_007331551.1|; hypothetical protein [Agaricus bisporus var. burnettii JB137-S8, AGABI1DRAFT_107890]}	{Q01738; CDH_PHACH Cellobiose dehydrogenase OS=Phanerochaete chrysosporium GN=CDH-1 PE=1 SV=1}	{abp:AGABI1DRAFT107890; K19069 CDH cellobiose dehydrogenase (acceptor) 1.1.99.18 }	{NA}	{GO:0050660; flavin adenine dinucleotide binding; molecular_function GO:0055114; oxidation-reduction process; biological_process GO:0016614; oxidoreductase activity, acting on CH-OH group of donors; molecular_function}	{AGE97206.1_AA8; {cellobiose dehydrogenase (Cdh);--;Phlebia lindtneri FCL22;--} Iron reductase domain AA8 proteins consist of a cytochrome domain (protoheme IX) of spectral class b. AA8 proteins were first described as the N-terminal hemic module found in the bipartite domain organization of the flavocytochrome CDH. They can also be found isolated or appended to a CBM. Their implication into Fent…
A00062	{CONTIG10:574249:575633:-}	{gi|568462236|ref|XP_006463185.1|; hypothetical protein [Agaricus bisporus var. bisporus H97, AGABI2DRAFT_224842]}	{NA}	{abv:AGABI2DRAFT224842; }	{NA}	{GO:0006468; protein phosphorylation; biological_process GO:0003824; NA GO:0009103; lipopolysaccharide biosynthetic process; biological_process GO:0000276; mitochondrial proton-transporting ATP synthase complex, coupling factor F(o); cellular_component GO:0006397; mRNA processing; biological_process GO:0016773; phosphotransferase activity, alcohol group as acceptor; molecular_function GO:0004672;…	{NA}
A00063	{CONTIG10:579929:583012:-}	{gi|597999189|ref|XP_007334187.1|; hypothetical protein [Agaricus bisporus var. burnettii JB137-S8, AGABI1DRAFT_132501]}	{NA}	{abp:AGABI1DRAFT132501; K06666 TUP1 general transcriptional corepressor TUP1 -- Environmental Information Processing; Signal transduction; MAPK signaling pathway - yeast [PATH:ko04011] Cellular Processes; Cell growth and death; Cell cycle - yeast [PATH:ko04111] }	{NA}	{GO:0006468; protein phosphorylation; biological_process GO:0016773; phosphotransferase activity, alcohol group as acceptor; molecular_function GO:0009103; lipopolysaccharide biosynthetic process; biological_process GO:0004672; protein kinase activity; molecular_function GO:0005515; protein binding; molecular_function GO:0016020; membrane; cellular_component GO:0005524; ATP binding; molecular_fun…	{NA}
A00064	{CONTIG10:583897:588162:+}	{gi|597999189|ref|XP_007334187.1|; hypothetical protein [Agaricus bisporus var. burnettii JB137-S8, AGABI1DRAFT_132501]}	{Q6INX4; ENOF1_XENLA Mitochondrial enolase superfamily member 1 OS=Xenopus laevis GN=enosf1 PE=2 SV=1}	{abp:AGABI1DRAFT132501; K06666 TUP1 general transcriptional corepressor TUP1 -- Environmental Information Processing; Signal transduction; MAPK signaling pathway - yeast [PATH:ko04011] Cellular Processes; Cell growth and death; Cell cycle - yeast [PATH:ko04111] }	{NA}	{GO:0005515; protein binding; molecular_function}	{NA}
A00065	{CONTIG10:591924:596263:+}	{gi|568445309|ref|XP_006457571.1|; hypothetical protein AGABI2DRAFT_230027, partial [Agaricus bisporus var. bisporus H97]}	{NA}	{abp:AGABI1DRAFT129845; }	{NA}	{GO:0005515; protein binding; molecular_function}	{NA}
A00066	{CONTIG10:597335:599793:-}	{gi|597992613|ref|XP_007332588.1|; hypothetical protein [Agaricus bisporus var. burnettii JB137-S8, AGABI1DRAFT_78091]}	{NA}	{abp:AGABI1DRAFT78091; }	{NA}	{GO:0055114; oxidation-reduction process; biological_process GO:0016491; oxidoreductase activity; molecular_function}	{NA}
A00067	{CONTIG10:602602:603237:+}	{gi|568462277|ref|XP_006463199.1|; hypothetical protein [Agaricus bisporus var. bisporus H97, AGABI2DRAFT_179632]}	{NA}	{abv:AGABI2DRAFT179632; }	{NA}	{NA}	{NA}
A00068	{CONTIG10:65221:65887:+}	{gi|598000759|ref|XP_007334552.1|; hypothetical protein [Agaricus bisporus var. burnettii JB137-S8, AGABI1DRAFT_132850]}	{NA}	{abp:AGABI1DRAFT132850; }	{NA}	{NA}	{NA}
A00069	{CONTIG10:603994:604767:-}	{gi|597992625|ref|XP_007332591.1|; hypothetical protein [Agaricus bisporus var. burnettii JB137-S8, AGABI1DRAFT_115589]}	{NA}	{abp:AGABI1DRAFT115589; }	{NA}	{GO:0016491; oxidoreductase activity; molecular_function GO:0008152; NA}	{NA}
A00070	{CONTIG10:605030:605601:-}	{gi|568462286|ref|XP_006463202.1|; hypothetical protein [Agaricus bisporus]}	{NA}	{abp:AGABI1DRAFT115590; K17422 MRPL41 large subunit ribosomal protein L41 -- }	{NA}	{NA}	{NA}
A00071	{CONTIG10:605977:606852:+}	{gi|568462289|ref|XP_006463203.1|; hypothetical protein [Agaricus bisporus var. bisporus H97, AGABI2DRAFT_194102]}	{Q12094; TSR3_YEAST Ribosome biogenesis protein TSR3 OS=Saccharomyces cerevisiae (strain ATCC 204508 / S288c) GN=TSR3 PE=1 SV=1}	{abv:AGABI2DRAFT194102; K09140 TSR3 pre-rRNA-processing protein TSR3 -- }	{YOR006c; KOG3154 Uncharacterized conserved protein S Function unknown ;}	{NA}	{NA}
A00072	{CONTIG10:607734:608173:+}	{gi|597985677|ref|XP_007330921.1|; hypothetical protein [Agaricus bisporus var. burnettii JB137-S8, AGABI1DRAFT_85895]}	{NA}	{abp:AGABI1DRAFT85895; }	{NA}	{NA}	{NA}
A00073	{CONTIG10:608315:609652:-}	{gi|597992637|ref|XP_007332594.1|; hypothetical protein [Agaricus bisporus var. burnettii JB137-S8, AGABI1DRAFT_122431]}	{P56286; IF2A_SCHPO Eukaryotic translation initiation factor 2 subunit alpha OS=Schizosaccharomyces pombe (strain 972 / ATCC 24843) GN=tif211 PE=1 SV=1}	{abp:AGABI1DRAFT122431; K03237 EIF2S1 translation initiation factor 2 subunit 1 -- Genetic Information Processing; Translation; RNA transport [PATH:ko03013] Cellular Processes; Transport and catabolism; Autophagy - yeast [PATH:ko04138] Cellular Processes; Transport and catabolism; Autophagy - animal [PATH:ko04140] Genetic Information Processing; Folding, sorting and degradation; Protein processin…	{SPAC3G9.09c; KOG2916 Translation initiation factor 2, alpha subunit (eIF-2alpha) J Translation, ribosomal structure and biogenesis ;}	{GO:0005850; eukaryotic translation initiation factor 2 complex; cellular_component GO:0003743; translation initiation factor activity; molecular_function GO:0003723; RNA binding; molecular_function}	{NA}
A00074	{CONTIG10:610647:613207:+}	{gi|568437726|ref|XP_006455048.1|; hypothetical protein [Agaricus bisporus var. bisporus H97, AGABI2DRAFT_180260]}	{NA}	{abv:AGABI2DRAFT180260; K03380 E1.14.13.7 phenol 2-monooxygenase 1.14.13.7 Metabolism; Xenobiotics biodegradation and metabolism; Toluene degradation [PATH:ko00623] Metabolism; Xenobiotics biodegradation and metabolism; Aminobenzoate degradation [PATH:ko00627] }	{NA}	{GO:0016117; carotenoid biosynthetic process; biological_process GO:0016491; oxidoreductase activity; molecular_function GO:0016021; integral to membrane; cellular_component GO:0050660; flavin adenine dinucleotide binding; molecular_function GO:0004506; squalene monooxygenase activity; molecular_function GO:0008033; tRNA processing; biological_process GO:0016705; oxidoreductase activity, acting o…	{NA}
A00075	{CONTIG10:614107:615960:+}	{gi|568445847|ref|XP_006457751.1|; hypothetical protein [Agaricus bisporus var. bisporus H97, AGABI2DRAFT_176362]}	{NA}	{abv:AGABI2DRAFT176362; }	{NA}	{GO:0005524; ATP binding; molecular_function GO:0043531; ADP binding; molecular_function}	{NA}
A00076	{CONTIG10:617740:620245:+}	{gi|568445847|ref|XP_006457751.1|; hypothetical protein [Agaricus bisporus var. bisporus H97, AGABI2DRAFT_176362]}	{NA}	{abv:AGABI2DRAFT176362; }	{NA}	{GO:0043531; ADP binding; molecular_function}	{NA}
A00077	{CONTIG10:622145:624195:-}	{gi|597995797|ref|XP_007333360.1|; hypothetical protein [Agaricus bisporus var. burnettii JB137-S8, AGABI1DRAFT_131701]}	{NA}	{abp:AGABI1DRAFT131701; }	{NA}	{NA}	{NA}
A00078	{CONTIG10:625047:627826:-}	{gi|597995793|ref|XP_007333359.1|; hypothetical protein [Agaricus bisporus var. burnettii JB137-S8, AGABI1DRAFT_94447]}	{NA}	{abp:AGABI1DRAFT94447; }	{NA}	{GO:0003735; structural constituent of ribosome; molecular_function GO:0005622; intracellular; cellular_component GO:0005840; ribosome; cellular_component GO:0006412; translation; biological_process}	{NA}
A00079	{CONTIG10:66408:67510:-}	{gi|598000767|ref|XP_007334554.1|; hypothetical protein [Agaricus bisporus var. burnettii JB137-S8, AGABI1DRAFT_109824]}	{NA}	{abp:AGABI1DRAFT109824; }	{NA}	{GO:0016021; integral to membrane; cellular_component GO:0009055; NA}	{NA}
A00080	{CONTIG10:629311:631659:+}	{gi|597991667|ref|XP_007332368.1|; hypothetical protein [Agaricus bisporus var. burnettii JB137-S8, AGABI1DRAFT_108438]}	{NA}	{abp:AGABI1DRAFT108438; }	{NA}	{GO:0043531; ADP binding; molecular_function}	{NA}
A00081	{CONTIG10:633292:634929:+}	{gi|568445847|ref|XP_006457751.1|; hypothetical protein [Agaricus bisporus var. bisporus H97, AGABI2DRAFT_176362]}	{NA}	{abv:AGABI2DRAFT176362; }	{NA}	{GO:0003723; RNA binding; molecular_function GO:0016887; ATPase activity; molecular_function GO:0005524; ATP binding; molecular_function GO:0003924; GTPase activity; molecular_function GO:0043531; ADP binding; molecular_function GO:0005525; GTP binding; molecular_function GO:0003724; RNA helicase activity; molecular_function}	{NA}
A00082	{CONTIG10:638482:641334:+}	{gi|597999339|ref|XP_007334221.1|; hypothetical protein [Agaricus bisporus var. burnettii JB137-S8, AGABI1DRAFT_132533]}	{NA}	{abp:AGABI1DRAFT132533; }	{NA}	{GO:0005524; ATP binding; molecular_function GO:0043531; ADP binding; molecular_function}	{NA}
A00083	{CONTIG10:641954:647525:+}	{gi|597999339|ref|XP_007334221.1|; hypothetical protein [Agaricus bisporus var. burnettii JB137-S8, AGABI1DRAFT_132533]}	{NA}	{abp:AGABI1DRAFT132533; }	{NA}	{GO:0043531; ADP binding; molecular_function GO:0005525; GTP binding; molecular_function GO:0003724; RNA helicase activity; molecular_function GO:0003723; RNA binding; molecular_function GO:0005524; ATP binding; molecular_function GO:0003924; GTPase activity; molecular_function}	{NA}
A00084	{CONTIG10:647853:650837:-}	{gi|597988775|ref|XP_007331676.1|; hypothetical protein [Agaricus bisporus var. burnettii JB137-S8, AGABI1DRAFT_130124]}	{NA}	{abp:AGABI1DRAFT130124; }	{NA}	{NA}	{NA}
A00085	{CONTIG10:651794:652773:+}	{gi|597974123|ref|XP_007328109.1|; hypothetical protein AGABI1DRAFT_56843, partial [Agaricus bisporus var. burnettii JB137-S8]}	{NA}	{abp:AGABI1DRAFT56843; }	{NA}	{NA}	{NA}
A00086	{CONTIG10:654867:657841:-}	{gi|597988775|ref|XP_007331676.1|; hypothetical protein [Agaricus bisporus var. burnettii JB137-S8, AGABI1DRAFT_130124]}	{NA}	{abp:AGABI1DRAFT130124; }	{NA}	{GO:0043531; ADP binding; molecular_function}	{NA}
A00087	{CONTIG10:661107:661890:+}	{gi|597992709|ref|XP_007332611.1|; hypothetical protein [Agaricus bisporus var. burnettii JB137-S8, AGABI1DRAFT_130996]}	{NA}	{abp:AGABI1DRAFT130996; }	{NA}	{GO:0006506; GPI anchor biosynthetic process; biological_process GO:0005789; endoplasmic reticulum membrane; cellular_component}	{NA}
A00088	{CONTIG10:669208:670114:-}	{gi|597976069|ref|XP_007328574.1|; hypothetical protein [Agaricus bisporus var. burnettii JB137-S8, AGABI1DRAFT_99143]}	{NA}	{abp:AGABI1DRAFT99143; }	{NA}	{GO:0016705; oxidoreductase activity, acting on paired donors, with incorporation or reduction of molecular oxygen; molecular_function GO:0005506; iron ion binding; molecular_function GO:0055114; oxidation-reduction process; biological_process GO:0020037; heme binding; molecular_function}	{NA}
A00089	{CONTIG10:676836:682725:+}	{gi|568462350|ref|XP_006463223.1|; hypothetical protein [Agaricus bisporus var. bisporus H97, AGABI2DRAFT_224899]}	{NA}	{abv:AGABI2DRAFT224899; }	{NA}	{NA}	{NA}
A00090	{CONTIG10:70040:72216:-}	{gi|597988233|ref|XP_007331543.1|; hypothetical protein [Agaricus bisporus var. burnettii JB137-S8, AGABI1DRAFT_76892]}	{NA}	{abp:AGABI1DRAFT76892; }	{NA}	{GO:0016491; oxidoreductase activity; molecular_function GO:0050661; NADP binding; molecular_function GO:0016117; carotenoid biosynthetic process; biological_process GO:0004499; flavin-containing monooxygenase activity; molecular_function GO:0050660; flavin adenine dinucleotide binding; molecular_function GO:0006813; potassium ion transport; biological_process GO:0016705; oxidoreductase activity,…	{NA}
A00091	{CONTIG10:683682:687158:-}	{NA}	{NA}	{NA}	{NA}	{GO:0043531; ADP binding; molecular_function GO:0005634; nucleus; cellular_component GO:0000981; sequence-specific DNA binding RNA polymerase II transcription factor activity; molecular_function GO:0005524; ATP binding; molecular_function GO:0008270; zinc ion binding; molecular_function GO:0006355; regulation of transcription, DNA-dependent; biological_process}	{NA}
A00092	{CONTIG10:687463:689177:+}	{NA}	{NA}	{NA}	{NA}	{NA}	{NA}
A00093	{CONTIG10:692315:693986:-}	{gi|568462341|ref|XP_006463220.1|; hypothetical protein [Agaricus bisporus]}	{NA}	{abp:AGABI1DRAFT115598; }	{NA}	{NA}	{NA}
A00094	{CONTIG10:698138:699706:-}	{gi|568462465|ref|XP_006463260.1|; hypothetical protein [Agaricus bisporus var. bisporus H97, AGABI2DRAFT_194141]}	{NA}	{abv:AGABI2DRAFT194141; }	{NA}	{NA}	{NA}
A00095	{CONTIG10:705031:705814:-}	{gi|597992709|ref|XP_007332611.1|; hypothetical protein [Agaricus bisporus var. burnettii JB137-S8, AGABI1DRAFT_130996]}	{NA}	{abp:AGABI1DRAFT130996; }	{NA}	{GO:0006506; GPI anchor biosynthetic process; biological_process GO:0005789; endoplasmic reticulum membrane; cellular_component}	{NA}
A00096	{CONTIG10:710944:715111:+}	{NA}	{NA}	{NA}	{NA}	{GO:0016301; kinase activity; molecular_function GO:0005524; ATP binding; molecular_function GO:0000723; telomere maintenance; biological_process GO:0006281; DNA repair; biological_process GO:0051085; chaperone mediated protein folding requiring cofactor; biological_process GO:0003678; DNA helicase activity; molecular_function}	{NA}
A00097	{CONTIG10:716328:718090:+}	{NA}	{NA}	{NA}	{NA}	{NA}	{NA}
A00098	{CONTIG10:728879:730848:+}	{gi|597992701|ref|XP_007332609.1|; hypothetical protein [Agaricus bisporus var. burnettii JB137-S8, AGABI1DRAFT_122435]}	{Q4WI46; CRF2_ASPFU Probable glycosidase crf2 OS=Neosartorya fumigata (strain ATCC MYA-4609 / Af293 / CBS 101355 / FGSC A1100) GN=crf1 PE=1 SV=1}	{abp:AGABI1DRAFT122435; }	{NA}	{GO:0004540; ribonuclease activity; molecular_function GO:0005975; carbohydrate metabolic process; biological_process GO:0004553; hydrolase activity, hydrolyzing O-glycosyl compounds; molecular_function GO:0008033; tRNA processing; biological_process}	{ADV19726.1_CBM18; {CGB_A5610C;--;Cryptococcus bacillisporus WM276;--} Modules of approx. 40 residues. The chitin-binding function has been demonstrated in many cases. These modules are found attached to a number of chitinase catalytic domains, but also in non-catalytic proteins either in isolation or as multiple repeats. NA; ADV19726.1_GH16; {CGB_A5610C;--;Cryptococcus bacillisporus WM276;--} xy…
A00099	{CONTIG10:731638:732811:-}	{gi|597992693|ref|XP_007332607.1|; hypothetical protein [Agaricus bisporus var. burnettii JB137-S8, AGABI1DRAFT_102127]}	{O07575; YHDF_BACSU Uncharacterized oxidoreductase YhdF OS=Bacillus subtilis (strain 168) GN=yhdF PE=3 SV=1}	{abp:AGABI1DRAFT102127; }	{SPAC4H3.08; KOG0725 Reductases with broad range of substrate specificities R General function prediction only ;}	{GO:0016491; oxidoreductase activity; molecular_function GO:0008152; NA}	{NA}
A00100	{CONTIG10:739293:741520:-}	{gi|597991667|ref|XP_007332368.1|; hypothetical protein [Agaricus bisporus var. burnettii JB137-S8, AGABI1DRAFT_108438]}	{NA}	{abp:AGABI1DRAFT108438; }	{NA}	{NA}	{NA}
A00101	{CONTIG10:73709:74549:-}	{gi|568461802|ref|XP_006463044.1|; hypothetical protein [Agaricus bisporus var. bisporus H97, AGABI2DRAFT_74076]}	{NA}	{abv:AGABI2DRAFT74076; }	{NA}	{NA}	{NA}
A00102	{CONTIG10:742385:744757:+}	{gi|597988775|ref|XP_007331676.1|; hypothetical protein [Agaricus bisporus var. burnettii JB137-S8, AGABI1DRAFT_130124]}	{NA}	{abp:AGABI1DRAFT130124; }	{NA}	{GO:0043531; ADP binding; molecular_function}	{NA}
A00103	{CONTIG10:746924:748046:+}	{gi|597991667|ref|XP_007332368.1|; hypothetical protein [Agaricus bisporus var. burnettii JB137-S8, AGABI1DRAFT_108438]}	{NA}	{abp:AGABI1DRAFT108438; }	{NA}	{NA}	{NA}
A00104	{CONTIG10:750387:752000:+}	{gi|597999277|ref|XP_007334208.1|; hypothetical protein [Agaricus bisporus var. burnettii JB137-S8, AGABI1DRAFT_109622]}	{NA}	{abp:AGABI1DRAFT109622; }	{NA}	{GO:0043531; ADP binding; molecular_function}	{NA}
A00105	{CONTIG10:753958:755241:-}	{gi|597991667|ref|XP_007332368.1|; hypothetical protein [Agaricus bisporus var. burnettii JB137-S8, AGABI1DRAFT_108438]}	{NA}	{abp:AGABI1DRAFT108438; }	{NA}	{NA}	{NA}
A00106	{CONTIG10:756936:759148:+}	{gi|597988775|ref|XP_007331676.1|; hypothetical protein [Agaricus bisporus var. burnettii JB137-S8, AGABI1DRAFT_130124]}	{NA}	{abp:AGABI1DRAFT130124; }	{NA}	{NA}	{NA}
A00107	{CONTIG10:761343:763752:-}	{gi|597999277|ref|XP_007334208.1|; hypothetical protein [Agaricus bisporus var. burnettii JB137-S8, AGABI1DRAFT_109622]}	{NA}	{abp:AGABI1DRAFT109622; }	{NA}	{GO:0043531; ADP binding; molecular_function}	{NA}
A00108	{CONTIG10:766614:768218:-}	{gi|597991667|ref|XP_007332368.1|; hypothetical protein [Agaricus bisporus var. burnettii JB137-S8, AGABI1DRAFT_108438]}	{NA}	{abp:AGABI1DRAFT108438; }	{NA}	{GO:0043531; ADP binding; molecular_function}	{NA}
A00109	{CONTIG10:769464:771901:-}	{gi|597999277|ref|XP_007334208.1|; hypothetical protein [Agaricus bisporus var. burnettii JB137-S8, AGABI1DRAFT_109622]}	{NA}	{abp:AGABI1DRAFT109622; }	{NA}	{GO:0043531; ADP binding; molecular_function}	{NA}
A00110	{CONTIG10:772860:775235:-}	{gi|597988775|ref|XP_007331676.1|; hypothetical protein [Agaricus bisporus var. burnettii JB137-S8, AGABI1DRAFT_130124]}	{NA}	{abp:AGABI1DRAFT130124; }	{NA}	{GO:0005524; ATP binding; molecular_function}	{NA}
A00111	{CONTIG10:776266:778047:-}	{gi|568445847|ref|XP_006457751.1|; hypothetical protein [Agaricus bisporus var. bisporus H97, AGABI2DRAFT_176362]}	{NA}	{abv:AGABI2DRAFT176362; }	{NA}	{GO:0043531; ADP binding; molecular_function}	{NA}
A00112	{CONTIG10:9719:10054:+}	{NA}	{NA}	{NA}	{NA}	{NA}	{NA}
A00113	{CONTIG10:80187:82229:-}	{gi|597991151|ref|XP_007332247.1|; hypothetical protein [Agaricus bisporus var. burnettii JB137-S8, AGABI1DRAFT_77728]}	{NA}	{abp:AGABI1DRAFT77728; }	{NA}	{GO:0016705; oxidoreductase activity, acting on paired donors, with incorporation or reduction of molecular oxygen; molecular_function GO:0020037; heme binding; molecular_function GO:0055114; oxidation-reduction process; biological_process GO:0005506; iron ion binding; molecular_function}	{NA}
A00114	{CONTIG10:779926:782045:-}	{gi|597988775|ref|XP_007331676.1|; hypothetical protein [Agaricus bisporus var. burnettii JB137-S8, AGABI1DRAFT_130124]}	{NA}	{abp:AGABI1DRAFT130124; }	{NA}	{NA}	{NA}
A00115	{CONTIG10:785006:787276:-}	{gi|597991667|ref|XP_007332368.1|; hypothetical protein [Agaricus bisporus var. burnettii JB137-S8, AGABI1DRAFT_108438]}	{NA}	{abp:AGABI1DRAFT108438; }	{NA}	{GO:0003924; GTPase activity; molecular_function GO:0043531; ADP binding; molecular_function GO:0005525; GTP binding; molecular_function}	{NA}
A00116	{CONTIG10:789628:791974:-}	{gi|597999277|ref|XP_007334208.1|; hypothetical protein [Agaricus bisporus var. burnettii JB137-S8, AGABI1DRAFT_109622]}	{NA}	{abp:AGABI1DRAFT109622; }	{NA}	{GO:0003924; GTPase activity; molecular_function GO:0005524; ATP binding; molecular_function GO:0005525; GTP binding; molecular_function GO:0043531; ADP binding; molecular_function}	{NA}
A00117	{CONTIG10:798300:799536:+}	{NA}	{NA}	{NA}	{NA}	{NA}	{NA}
A00118	{CONTIG10:802400:805223:+}	{gi|597991651|ref|XP_007332364.1|; hypothetical protein [Agaricus bisporus var. burnettii JB137-S8, AGABI1DRAFT_130798]}	{NA}	{abp:AGABI1DRAFT130798; }	{NA}	{NA}	{NA}
A00119	{CONTIG10:808247:811645:+}	{gi|576984151|gb|EUC56894.1|; reverse transcriptase/ribonuclease H, putative [Rhizoctonia solani AG-3 Rhs1AP]}	{NA}	{NA}	{NA}	{NA}	{NA}
A00120	{CONTIG10:813588:816118:-}	{gi|597988775|ref|XP_007331676.1|; hypothetical protein [Agaricus bisporus var. burnettii JB137-S8, AGABI1DRAFT_130124]}	{NA}	{abp:AGABI1DRAFT130124; }	{NA}	{GO:0043531; ADP binding; molecular_function GO:0005525; GTP binding; molecular_function GO:0005524; ATP binding; molecular_function GO:0003924; GTPase activity; molecular_function}	{NA}
A00121	{CONTIG10:819126:820745:-}	{gi|568445847|ref|XP_006457751.1|; hypothetical protein [Agaricus bisporus var. bisporus H97, AGABI2DRAFT_176362]}	{NA}	{abv:AGABI2DRAFT176362; }	{NA}	{GO:0003724; RNA helicase activity; molecular_function GO:0043531; ADP binding; molecular_function GO:0016887; ATPase activity; molecular_function GO:0003723; RNA binding; molecular_function GO:0005524; ATP binding; molecular_function}	{NA}
A00122	{CONTIG10:822450:824884:-}	{gi|597988775|ref|XP_007331676.1|; hypothetical protein [Agaricus bisporus var. burnettii JB137-S8, AGABI1DRAFT_130124]}	{NA}	{abp:AGABI1DRAFT130124; }	{NA}	{GO:0043531; ADP binding; molecular_function}	{NA}
A00123	{CONTIG10:825780:828565:-}	{gi|568445124|ref|XP_006457507.1|; hypothetical protein [Agaricus bisporus var. bisporus H97, AGABI2DRAFT_147031]}	{NA}	{abp:AGABI1DRAFT130983; }	{NA}	{NA}	{NA}
A00124	{CONTIG10:88513:90182:-}	{NA}	{NA}	{NA}	{NA}	{NA}	{NA}
A00125	{CONTIG10:829797:831686:-}	{gi|597997227|ref|XP_007333708.1|; hypothetical protein [Agaricus bisporus var. burnettii JB137-S8, AGABI1DRAFT_94713]}	{NA}	{abp:AGABI1DRAFT94713; }	{NA}	{NA}	{NA}
A00126	{CONTIG10:832968:835090:-}	{gi|597988775|ref|XP_007331676.1|; hypothetical protein [Agaricus bisporus var. burnettii JB137-S8, AGABI1DRAFT_130124]}	{NA}	{abp:AGABI1DRAFT130124; }	{NA}	{GO:0005524; ATP binding; molecular_function GO:0003723; RNA binding; molecular_function GO:0043531; ADP binding; molecular_function GO:0003724; RNA helicase activity; molecular_function}	{NA}
A00127	{CONTIG10:836872:838485:-}	{gi|568445847|ref|XP_006457751.1|; hypothetical protein [Agaricus bisporus var. bisporus H97, AGABI2DRAFT_176362]}	{NA}	{abv:AGABI2DRAFT176362; }	{NA}	{GO:0043531; ADP binding; molecular_function}	{NA}
A00128	{CONTIG10:839371:841747:-}	{gi|597988775|ref|XP_007331676.1|; hypothetical protein [Agaricus bisporus var. burnettii JB137-S8, AGABI1DRAFT_130124]}	{NA}	{abp:AGABI1DRAFT130124; }	{NA}	{GO:0005524; ATP binding; molecular_function GO:0016887; ATPase activity; molecular_function GO:0043531; ADP binding; molecular_function}	{NA}
A00129	{CONTIG10:843233:844840:-}	{gi|568445847|ref|XP_006457751.1|; hypothetical protein [Agaricus bisporus var. bisporus H97, AGABI2DRAFT_176362]}	{NA}	{abv:AGABI2DRAFT176362; }	{NA}	{GO:0043531; ADP binding; molecular_function}	{NA}
A00130	{CONTIG10:846057:848801:-}	{gi|597988775|ref|XP_007331676.1|; hypothetical protein [Agaricus bisporus var. burnettii JB137-S8, AGABI1DRAFT_130124]}	{NA}	{abp:AGABI1DRAFT130124; }	{NA}	{GO:0005524; ATP binding; molecular_function GO:0043531; ADP binding; molecular_function}	{NA}
A00131	{CONTIG10:852904:855286:-}	{gi|597991667|ref|XP_007332368.1|; hypothetical protein [Agaricus bisporus var. burnettii JB137-S8, AGABI1DRAFT_108438]}	{NA}	{abp:AGABI1DRAFT108438; }	{NA}	{GO:0005524; ATP binding; molecular_function GO:0043531; ADP binding; molecular_function}	{NA}
A00132	{CONTIG10:860035:861120:+}	{gi|599123978|ref|XP_007389157.1|; hypothetical protein [Punctularia strigosozonata HHB-11173 SS5, PUNSTDRAFT_139384]}	{NA}	{psq:PUNSTDRAFT_68235; }	{NA}	{GO:0003677; DNA binding; molecular_function GO:0006310; DNA recombination; biological_process GO:0015074; DNA integration; biological_process}	{NA}
A00133	{CONTIG10:862486:865002:-}	{gi|597989213|ref|XP_007331781.1|; hypothetical protein [Agaricus bisporus var. burnettii JB137-S8, AGABI1DRAFT_130203]}	{NA}	{abp:AGABI1DRAFT130203; }	{NA}	{GO:0003724; RNA helicase activity; molecular_function GO:0003723; RNA binding; molecular_function}	{NA}
A00134	{CONTIG10:866714:872490:+}	{gi|598039493|ref|XP_007349119.1|; DNA/RNA polymerase [Auricularia delicata TFB-10046 SS5]}	{NA}	{mpr:MPER_13146; }	{NA}	{GO:0015074; DNA integration; biological_process}	{NA}
A00135	{CONTIG10:90626:92980:-}	{gi|568461789|ref|XP_006463040.1|; hypothetical protein AGABI2DRAFT_194065, partial [Agaricus bisporus var. bisporus H97]}	{P0CM39; ATG7_CRYNB Ubiquitin-like modifier-activating enzyme ATG7 OS=Cryptococcus neoformans var. neoformans serotype D (strain B-3501A) GN=ATG7 PE=3 SV=1}	{abv:AGABI2DRAFT194065; K08337 ATG7 ubiquitin-like modifier-activating enzyme ATG7 -- Cellular Processes; Transport and catabolism; Autophagy - other eukaryotes [PATH:ko04136] Cellular Processes; Transport and catabolism; Autophagy - yeast [PATH:ko04138] Cellular Processes; Transport and catabolism; Autophagy - animal [PATH:ko04140] Cellular Processes; Cell growth and death; Ferroptosis [PATH:ko0…	{Hs5453668; KOG2337 Ubiquitin activating E1 enzyme-like protein H Coenzyme transport and metabolism ;}	{GO:0003824; NA}	{NA}
A00136	{CONTIG10:875236:875613:-}	{gi|597981253|ref|XP_007329845.1|; hypothetical protein [Agaricus bisporus var. burnettii JB137-S8, AGABI1DRAFT_91720]}	{NA}	{abp:AGABI1DRAFT91720; }	{NA}	{NA}	{NA}
A00137	{CONTIG10:876432:878814:-}	{gi|597999593|ref|XP_007334278.1|; hypothetical protein AGABI1DRAFT_47004, partial [Agaricus bisporus var. burnettii JB137-S8]}	{NA}	{abp:AGABI1DRAFT47004; }	{NA}	{NA}	{NA}
A00138	{CONTIG10:879363:882198:-}	{gi|597999709|ref|XP_007334304.1|; hypothetical protein [Agaricus bisporus var. burnettii JB137-S8, AGABI1DRAFT_132613]}	{NA}	{abp:AGABI1DRAFT132613; K15172 SUPT5H, SPT5 transcription elongation factor SPT5 -- }	{NA}	{NA}	{NA}
A00139	{CONTIG10:885091:885656:+}	{NA}	{NA}	{NA}	{NA}	{NA}	{NA}
A00140	{CONTIG10:886423:886999:+}	{NA}	{NA}	{NA}	{NA}	{NA}	{NA}
A00141	{CONTIG10:889072:890748:-}	{gi|597989213|ref|XP_007331781.1|; hypothetical protein [Agaricus bisporus var. burnettii JB137-S8, AGABI1DRAFT_130203]}	{NA}	{abp:AGABI1DRAFT130203; }	{NA}	{GO:0043531; ADP binding; molecular_function GO:0005524; ATP binding; molecular_function}	{NA}
A00142	{CONTIG10:897012:897791:-}	{NA}	{NA}	{NA}	{NA}	{NA}	{NA}
A00143	{CONTIG10:901474:905566:+}	{NA}	{NA}	{NA}	{NA}	{NA}	{NA}
A00144	{CONTIG10:909399:910730:-}	{gi|568454172|ref|XP_006460513.1|; hypothetical protein [Agaricus bisporus var. bisporus H97, AGABI2DRAFT_68342]}	{NA}	{abv:AGABI2DRAFT68342; }	{NA}	{NA}	{NA}
A00145	{CONTIG10:912117:913983:-}	{gi|597966509|ref|XP_007326194.1|; hypothetical protein [Agaricus bisporus var. burnettii JB137-S8, AGABI1DRAFT_67858]}	{NA}	{abp:AGABI1DRAFT67858; }	{NA}	{GO:0016706; oxidoreductase activity, acting on paired donors, with incorporation or reduction of molecular oxygen, 2-oxoglutarate as one donor, and incorporation of one atom each of oxygen into both donors; molecular_function GO:0016491; oxidoreductase activity; molecular_function GO:0055114; oxidation-reduction process; biological_process}	{NA}
A00146	{CONTIG10:93041:96872:+}	{gi|598000793|ref|XP_007334560.1|; hypothetical protein [Agaricus bisporus var. burnettii JB137-S8, AGABI1DRAFT_132857]}	{NA}	{abp:AGABI1DRAFT132857; }	{NA}	{GO:0005515; protein binding; molecular_function}	{NA}
A00147	{CONTIG10:915888:918864:-}	{gi|568447682|ref|XP_006458358.1|; hypothetical protein [Agaricus bisporus var. bisporus H97, AGABI2DRAFT_115376]}	{NA}	{abv:AGABI2DRAFT115376; }	{NA}	{NA}	{NA}
A00148	{CONTIG10:925440:926352:-}	{NA}	{NA}	{NA}	{NA}	{NA}	{NA}
A00149	{CONTIG10:931199:932616:+}	{NA}	{NA}	{NA}	{NA}	{GO:0005515; protein binding; molecular_function}	{NA}
A00150	{CONTIG10:938103:938834:+}	{NA}	{NA}	{NA}	{NA}	{GO:0006275; regulation of DNA replication; biological_process}	{NA}
A00151	{CONTIG10:945774:948025:-}	{gi|597989213|ref|XP_007331781.1|; hypothetical protein [Agaricus bisporus var. burnettii JB137-S8, AGABI1DRAFT_130203]}	{NA}	{abp:AGABI1DRAFT130203; }	{NA}	{NA}	{NA}
A00152	{CONTIG10:950317:951947:-}	{gi|597989213|ref|XP_007331781.1|; hypothetical protein [Agaricus bisporus var. burnettii JB137-S8, AGABI1DRAFT_130203]}	{NA}	{abp:AGABI1DRAFT130203; }	{NA}	{GO:0005524; ATP binding; molecular_function GO:0043531; ADP binding; molecular_function}	{NA}
A00153	{CONTIG10:953118:955541:-}	{gi|597989191|ref|XP_007331775.1|; hypothetical protein [Agaricus bisporus var. burnettii JB137-S8, AGABI1DRAFT_115102]}	{O74187; ALDH_AGABI Aldehyde dehydrogenase OS=Agaricus bisporus GN=aldA PE=3 SV=1}	{abp:AGABI1DRAFT115102; K00128 ALDH aldehyde dehydrogenase (NAD+) 1.2.1.3 Metabolism; Carbohydrate metabolism; Glycolysis / Gluconeogenesis [PATH:ko00010] Metabolism; Carbohydrate metabolism; Ascorbate and aldarate metabolism [PATH:ko00053] Metabolism; Lipid metabolism; Fatty acid degradation [PATH:ko00071] Metabolism; Amino acid metabolism; Valine, leucine and isoleucine degradation [PATH:ko0028…	{SPAC9E9.09c; KOG2450 Aldehyde dehydrogenase C Energy production and conversion ;}	{GO:0055114; oxidation-reduction process; biological_process GO:0008152; NA GO:0016491; oxidoreductase activity; molecular_function}	{NA}
A00154	{CONTIG10:956244:958789:-}	{gi|597989213|ref|XP_007331781.1|; hypothetical protein [Agaricus bisporus var. burnettii JB137-S8, AGABI1DRAFT_130203]}	{NA}	{abp:AGABI1DRAFT130203; }	{NA}	{GO:0007264; small GTPase mediated signal transduction; biological_process GO:0043531; ADP binding; molecular_function GO:0005622; intracellular; cellular_component GO:0005525; GTP binding; molecular_function}	{NA}
A00155	{CONTIG10:959880:961021:-}	{gi|597989513|ref|XP_007331850.1|; hypothetical protein [Agaricus bisporus var. burnettii JB137-S8, AGABI1DRAFT_115151]}	{NA}	{abp:AGABI1DRAFT115151; }	{NA}	{GO:0016787; hydrolase activity; molecular_function GO:0006541; glutamine metabolic process; biological_process}	{NA}
A00156	{CONTIG10:962220:965084:-}	{gi|597989213|ref|XP_007331781.1|; hypothetical protein [Agaricus bisporus var. burnettii JB137-S8, AGABI1DRAFT_130203]}	{NA}	{abp:AGABI1DRAFT130203; }	{NA}	{GO:0003723; RNA binding; molecular_function GO:0043531; ADP binding; molecular_function GO:0003724; RNA helicase activity; molecular_function}	{NA}
A00157	{CONTIG10:97938:99852:-}	{gi|598000801|ref|XP_007334562.1|; hypothetical protein [Agaricus bisporus var. burnettii JB137-S8, AGABI1DRAFT_132859]}	{NA}	{abp:AGABI1DRAFT132859; }	{NA}	{GO:0016021; integral to membrane; cellular_component GO:0055085; transmembrane transport; biological_process}	{NA}
A00158	{CONTIG10:965613:967743:+}	{gi|568444901|ref|XP_006457433.1|; hypothetical protein [Agaricus bisporus var. bisporus H97, AGABI2DRAFT_229854]}	{NA}	{abv:AGABI2DRAFT206554; }	{NA}	{GO:0016021; integral to membrane; cellular_component GO:0055085; transmembrane transport; biological_process}	{NA}
A00159	{CONTIG10:968089:969645:-}	{gi|646396791|gb|KDQ61043.1|; hypothetical protein [Jaapia argillacea MUCL 33604, JAAARDRAFT_709558]}	{NA}	{hir:HETIRDRAFT_454139; }	{NA}	{GO:0016020; membrane; cellular_component GO:0019082; viral protein processing; biological_process GO:0004252; serine-type endopeptidase activity; molecular_function GO:0016032; NA GO:0006508; proteolysis; biological_process}	{NA}
A00160	{CONTIG10:971039:973215:+}	{gi|568444913|ref|XP_006457437.1|; hypothetical protein [Agaricus bisporus var. bisporus H97, AGABI2DRAFT_196132]}	{O74187; ALDH_AGABI Aldehyde dehydrogenase OS=Agaricus bisporus GN=aldA PE=3 SV=1}	{abp:AGABI1DRAFT108035; K00128 ALDH aldehyde dehydrogenase (NAD+) 1.2.1.3 Metabolism; Carbohydrate metabolism; Glycolysis / Gluconeogenesis [PATH:ko00010] Metabolism; Carbohydrate metabolism; Ascorbate and aldarate metabolism [PATH:ko00053] Metabolism; Lipid metabolism; Fatty acid degradation [PATH:ko00071] Metabolism; Amino acid metabolism; Valine, leucine and isoleucine degradation [PATH:ko0028…	{SPAC9E9.09c; KOG2450 Aldehyde dehydrogenase C Energy production and conversion ;}	{GO:0008218; bioluminescence; biological_process GO:0055114; oxidation-reduction process; biological_process GO:0003995; acyl-CoA dehydrogenase activity; molecular_function GO:0008152; NA GO:0016491; oxidoreductase activity; molecular_function}	{NA}
A00161	{CONTIG10:973928:976086:+}	{gi|597988919|ref|XP_007331711.1|; hypothetical protein [Agaricus bisporus var. burnettii JB137-S8, AGABI1DRAFT_61606]}	{Q6P371; HOT_XENTR Hydroxyacid-oxoacid transhydrogenase, mitochondrial OS=Xenopus tropicalis GN=adhfe1 PE=2 SV=1}	{abp:AGABI1DRAFT61606; K11173 ADHFE1 hydroxyacid-oxoacid transhydrogenase 1.1.99.24 }	{Hs21389519; KOG3857 Alcohol dehydrogenase, class IV C Energy production and conversion ;}	{GO:0055114; oxidation-reduction process; biological_process GO:0046872; metal ion binding; molecular_function GO:0016491; oxidoreductase activity; molecular_function}	{NA}
A00162	{CONTIG10:976226:977109:-}	{gi|568444922|ref|XP_006457440.1|; hypothetical protein [Agaricus bisporus var. bisporus H97, AGABI2DRAFT_188988]}	{NA}	{abp:AGABI1DRAFT61608; }	{NA}	{NA}	{NA}
A00163	{CONTIG10:985785:987203:+}	{gi|568444928|ref|XP_006457442.1|; hypothetical protein [Agaricus bisporus var. bisporus H97, AGABI2DRAFT_196136]}	{Q5AAI8; NAP1_CANAL Nucleosome assembly protein 1 OS=Candida albicans (strain SC5314 / ATCC MYA-2876) GN=NAP1 PE=1 SV=1}	{abp:AGABI1DRAFT86473; K11279 NAP1L1, NRP nucleosome assembly protein 1-like 1 -- }	{YKR048c; KOG1507 Nucleosome assembly protein NAP-1 BD Chromatin structure and dynamics ; Cell cycle control, cell division, chromosome partitioning ;}	{GO:0008289; lipid binding; molecular_function GO:0005681; spliceosomal complex; cellular_component GO:0000398; nuclear mRNA splicing, via spliceosome; biological_process GO:0006869; lipid transport; biological_process GO:0006334; nucleosome assembly; biological_process GO:0051082; unfolded protein binding; molecular_function GO:0005576; NA GO:0005634; nucleus; cellular_component GO:0042157; lipo…	{NA}
A00164	{CONTIG10:991611:993116:-}	{gi|597988965|ref|XP_007331722.1|; hypothetical protein [Agaricus bisporus var. burnettii JB137-S8, AGABI1DRAFT_77017]}	{NA}	{abp:AGABI1DRAFT77017; }	{NA}	{GO:0009405; pathogenesis; biological_process}	{NA}
A00165	{CONTIG10:996563:997159:-}	{gi|568444937|ref|XP_006457445.1|; hypothetical protein [Agaricus bisporus var. bisporus H97, AGABI2DRAFT_196138]}	{P32573; SPS19_YEAST Peroxisomal 2,4-dienoyl-CoA reductase SPS19 OS=Saccharomyces cerevisiae (strain ATCC 204508 / S288c) GN=SPS19 PE=1 SV=4}	{abp:AGABI1DRAFT115110; K13237 DECR2 peroxisomal 2,4-dienoyl-CoA reductase 1.3.1.34 Cellular Processes; Transport and catabolism; Peroxisome [PATH:ko04146] }	{YNL202w; KOG0725 Reductases with broad range of substrate specificities R General function prediction only ;}	{GO:0016491; oxidoreductase activity; molecular_function GO:0008152; NA}	{NA}
A00166	{CONTIG10:999524:1000747:-}	{gi|568444940|ref|XP_006457446.1|; hypothetical protein [Agaricus bisporus]}	{NA}	{abp:AGABI1DRAFT108046; }	{NA}	{NA}	{NA}
A00167	{CONTIG10:1002346:1003792:+}	{gi|597989297|ref|XP_007331800.1|; hypothetical protein [Agaricus bisporus var. burnettii JB137-S8, AGABI1DRAFT_115113]}	{NA}	{abp:AGABI1DRAFT115113; K00757 udp, UPP uridine phosphorylase 2.4.2.3 Metabolism; Nucleotide metabolism; Pyrimidine metabolism [PATH:ko00240] Metabolism; Xenobiotics biodegradation and metabolism; Drug metabolism - other enzymes [PATH:ko00983] }	{NA}	{GO:0003824; NA GO:0009116; nucleoside metabolic process; biological_process GO:0009058; biosynthetic process; biological_process}	{NA}
A00168	{CONTIG10:99940:102049:+}	{gi|568461806|ref|XP_006463045.1|; hypothetical protein [Agaricus bisporus var. bisporus H97, AGABI2DRAFT_119854]}	{NA}	{abv:AGABI2DRAFT119854; }	{NA}	{NA}	{NA}
A00169	{CONTIG10:1010108:1014494:-}	{NA}	{NA}	{NA}	{NA}	{NA}	{NA}
A00170	{CONTIG10:1019251:1021933:-}	{gi|568444952|ref|XP_006457450.1|; hypothetical protein [Agaricus bisporus var. bisporus H97, AGABI2DRAFT_181656]}	{NA}	{abp:AGABI1DRAFT77029; }	{NA}	{GO:0016747; transferase activity, transferring acyl groups other than amino-acyl groups; molecular_function GO:0008080; N-acetyltransferase activity; molecular_function}	{AFO72239.1_AA9; {GH61J;--;Heterobasidion parviporum;--} AA9 (formerly GH61) proteins are copper-dependent lytic polysaccharide monooxygenases (LPMOs); cleavage of cellulose chains with oxidation of various carbons (C-1, C-4 and C-6) has been reported several times in the literature; AA9 (formerly GH61). The enzymes in this family were originally classified as a glycoside hydrolases (GH61) based …
A00171	{CONTIG10:1023054:1024203:-}	{gi|597988973|ref|XP_007331724.1|; hypothetical protein [Agaricus bisporus var. burnettii JB137-S8, AGABI1DRAFT_77031]}	{NA}	{abp:AGABI1DRAFT77031; }	{NA}	{NA}	{AFO72239.1_AA9; {GH61J;--;Heterobasidion parviporum;--} AA9 (formerly GH61) proteins are copper-dependent lytic polysaccharide monooxygenases (LPMOs); cleavage of cellulose chains with oxidation of various carbons (C-1, C-4 and C-6) has been reported several times in the literature; AA9 (formerly GH61). The enzymes in this family were originally classified as a glycoside hydrolases (GH61) based …
A00172	{CONTIG10:1026129:1027268:-}	{gi|568444964|ref|XP_006457454.1|; hypothetical protein [Agaricus bisporus var. bisporus H97, AGABI2DRAFT_196144]}	{NA}	{abp:AGABI1DRAFT115116; }	{NA}	{NA}	{NA}
A00173	{CONTIG10:1029179:1029795:+}	{gi|597989321|ref|XP_007331806.1|; hypothetical protein [Agaricus bisporus var. burnettii JB137-S8, AGABI1DRAFT_86482]}	{NA}	{abp:AGABI1DRAFT86482; }	{NA}	{GO:0004519; endonuclease activity; molecular_function GO:0006298; mismatch repair; biological_process}	{NA}
A00174	{CONTIG10:1031328:1031941:+}	{gi|597989321|ref|XP_007331806.1|; hypothetical protein [Agaricus bisporus var. burnettii JB137-S8, AGABI1DRAFT_86482]}	{NA}	{abp:AGABI1DRAFT86482; }	{NA}	{GO:0006511; ubiquitin-dependent protein catabolic process; biological_process GO:0004221; ubiquitin thiolesterase activity; molecular_function GO:0005622; intracellular; cellular_component}	{NA}
A00175	{CONTIG10:1033695:1034299:+}	{gi|597989321|ref|XP_007331806.1|; hypothetical protein [Agaricus bisporus var. burnettii JB137-S8, AGABI1DRAFT_86482]}	{NA}	{abp:AGABI1DRAFT86482; }	{NA}	{GO:0004519; endonuclease activity; molecular_function GO:0006298; mismatch repair; biological_process}	{NA}
A00176	{CONTIG10:1035457:1036810:-}	{gi|568444970|ref|XP_006457456.1|; hypothetical protein [Agaricus bisporus]}	{Q29RI6; CAB39_BOVIN Calcium-binding protein 39 OS=Bos taurus GN=CAB39 PE=2 SV=1}	{abp:AGABI1DRAFT115118; K08272 CAB39, MO25 calcium binding protein 39 -- Environmental Information Processing; Signal transduction; mTOR signaling pathway [PATH:ko04150] Environmental Information Processing; Signal transduction; AMPK signaling pathway [PATH:ko04152] }	{CE28410_2; KOG1566 Conserved protein Mo25 S Function unknown ;}	{NA}	{NA}
A00177	{CONTIG10:1044128:1045254:+}	{gi|597989513|ref|XP_007331850.1|; hypothetical protein [Agaricus bisporus var. burnettii JB137-S8, AGABI1DRAFT_115151]}	{NA}	{abp:AGABI1DRAFT115151; }	{NA}	{NA}	{NA}
A00178	{CONTIG10:1046297:1048720:-}	{gi|568444973|ref|XP_006457457.1|; hypothetical protein [Agaricus bisporus var. bisporus H97, AGABI2DRAFT_212881]}	{NA}	{abp:AGABI1DRAFT77037; K14844 PUF6 pumilio homology domain family member 6 -- }	{NA}	{GO:0003723; RNA binding; molecular_function}	{NA}
A00179	{CONTIG10:104381:105937:-}	{gi|691788899|emb|CDO75026.1|; hypothetical protein [Trametes cinnabarina, BN946_scf184640.g1]}	{NA}	{abv:AGABI2DRAFT58655; }	{NA}	{NA}	{NA}
A00180	{CONTIG10:1049201:1049525:+}	{NA}	{NA}	{NA}	{NA}	{NA}	{NA}
A00181	{CONTIG10:1050569:1052683:-}	{gi|568433915|ref|XP_006453786.1|; cytochrome p450, partial [Agaricus bisporus var. bisporus H97]}	{NA}	{abv:AGABI2DRAFT213259; }	{NA}	{GO:0016705; oxidoreductase activity, acting on paired donors, with incorporation or reduction of molecular oxygen; molecular_function GO:0055114; oxidation-reduction process; biological_process GO:0020037; heme binding; molecular_function GO:0005506; iron ion binding; molecular_function}	{NA}
A00182	{CONTIG10:1056792:1058109:+}	{gi|597989337|ref|XP_007331810.1|; hypothetical protein [Agaricus bisporus var. burnettii JB137-S8, AGABI1DRAFT_115122]}	{NA}	{abp:AGABI1DRAFT115122; K06125 COQ2 4-hydroxybenzoate polyprenyltransferase 2.5.1.39 Metabolism; Metabolism of cofactors and vitamins; Ubiquinone and other terpenoid-quinone biosynthesis [PATH:ko00130] }	{NA}	{GO:0016021; integral to membrane; cellular_component GO:0004659; prenyltransferase activity; molecular_function}	{NA}
A00183	{CONTIG10:1060088:1061585:-}	{gi|568444991|ref|XP_006457463.1|; putative polyprenyl diphosphate synthase [Agaricus bisporus var. bisporus H97]}	{Q7S565; COQ1_NEUCR Probable hexaprenyl pyrophosphate synthase, mitochondrial OS=Neurospora crassa (strain ATCC 24698 / 74-OR23-1A / CBS 708.71 / DSM 1257 / FGSC 987) GN=NCU02305 PE=3 SV=1}	{abp:AGABI1DRAFT121951; K05355 hexPS, COQ1 hexaprenyl-diphosphate synthase 2.5.1.82 2.5.1.83 Metabolism; Metabolism of terpenoids and polyketides; Terpenoid backbone biosynthesis [PATH:ko00900] }	{SPBPJ4664.01; KOG0776 Geranylgeranyl pyrophosphate synthase/Polyprenyl synthetase H Coenzyme transport and metabolism ;}	{GO:0008299; isoprenoid biosynthetic process; biological_process}	{NA}
A00184	{CONTIG10:1062166:1063048:+}	{gi|691792340|emb|CDO72424.1|; hypothetical protein [Trametes cinnabarina, BN946_scf184977.g124]}	{NA}	{shs:STEHIDRAFT_82762; }	{NA}	{GO:0005737; cytoplasm; cellular_component GO:0016998; cell wall macromolecule catabolic process; biological_process GO:0018149; peptide cross-linking; biological_process}	{NA}
A00185	{CONTIG10:1075285:1076355:+}	{NA}	{NA}	{NA}	{NA}	{NA}	{NA}
A00186	{CONTIG10:1081261:1082160:-}	{NA}	{NA}	{NA}	{NA}	{NA}	{NA}
A00187	{CONTIG10:1082934:1083449:-}	{gi|597981253|ref|XP_007329845.1|; hypothetical protein [Agaricus bisporus var. burnettii JB137-S8, AGABI1DRAFT_91720]}	{NA}	{abp:AGABI1DRAFT91720; }	{NA}	{NA}	{NA}
A00188	{CONTIG10:1084004:1089899:-}	{gi|597999709|ref|XP_007334304.1|; hypothetical protein [Agaricus bisporus var. burnettii JB137-S8, AGABI1DRAFT_132613]}	{NA}	{abp:AGABI1DRAFT132613; K15172 SUPT5H, SPT5 transcription elongation factor SPT5 -- }	{NA}	{NA}	{NA}
A00189	{CONTIG10:1092791:1093356:+}	{NA}	{NA}	{NA}	{NA}	{NA}	{NA}
A00190	{CONTIG10:107833:109692:-}	{NA}	{NA}	{NA}	{NA}	{GO:0003712; transcription cofactor activity; molecular_function GO:0000124; SAGA complex; cellular_component}	{NA}
A00191	{CONTIG10:1094122:1096065:+}	{gi|597999699|ref|XP_007334302.1|; hypothetical protein [Agaricus bisporus var. burnettii JB137-S8, AGABI1DRAFT_95176]}	{NA}	{abp:AGABI1DRAFT95176; }	{NA}	{NA}	{NA}
A00192	{CONTIG10:1097447:1098082:-}	{gi|471865111|emb|CCO38049.1|; Retrotransposable element Tf2 155 kDa protein type 3 [Rhizoctonia solani AG-1 IB]}	{NA}	{psq:PUNSTDRAFT_23432; }	{NA}	{GO:0015074; DNA integration; biological_process}	{NA}
A00193	{CONTIG10:1098518:1099574:-}	{gi|238576255|ref|XP_002387971.1|; hypothetical protein [Moniliophthora perniciosa FA553, MPER_13072]}	{NA}	{mpr:MPER_12920; }	{NA}	{GO:0006278; RNA-dependent DNA replication; biological_process GO:0003723; RNA binding; molecular_function GO:0003964; RNA-directed DNA polymerase activity; molecular_function}	{NA}
A00194	{CONTIG10:1106105:1107675:-}	{gi|568445006|ref|XP_006457468.1|; hypothetical protein [Agaricus bisporus var. bisporus H97, AGABI2DRAFT_212894]}	{NA}	{abp:AGABI1DRAFT130252; }	{NA}	{GO:0016705; oxidoreductase activity, acting on paired donors, with incorporation or reduction of molecular oxygen; molecular_function GO:0055114; oxidation-reduction process; biological_process GO:0020037; heme binding; molecular_function GO:0005506; iron ion binding; molecular_function}	{NA}
A00195	{CONTIG10:1111039:1112308:-}	{gi|568445018|ref|XP_006457472.1|; hypothetical protein [Agaricus bisporus]}	{O60122; TRPD_SCHPO Anthranilate phosphoribosyltransferase OS=Schizosaccharomyces pombe (strain 972 / ATCC 24843) GN=trp4 PE=3 SV=1}	{abp:AGABI1DRAFT121956; K00766 trpD anthranilate phosphoribosyltransferase 2.4.2.18 Metabolism; Amino acid metabolism; Phenylalanine, tyrosine and tryptophan biosynthesis [PATH:ko00400] }	{SPBC16G5.08; KOG1438 Anthranilate phosphoribosyltransferase E Amino acid transport and metabolism ;}	{GO:0016757; transferase activity, transferring glycosyl groups; molecular_function GO:0008152; NA}	{NA}
A00196	{CONTIG10:1114805:1116166:+}	{gi|597989411|ref|XP_007331827.1|; hypothetical protein [Agaricus bisporus var. burnettii JB137-S8, AGABI1DRAFT_130257]}	{NA}	{abp:AGABI1DRAFT130257; }	{NA}	{GO:0055114; oxidation-reduction process; biological_process GO:0016491; oxidoreductase activity; molecular_function}	{NA}
A00197	{CONTIG10:1117255:1119692:-}	{gi|568442345|ref|XP_006456583.1|; hypothetical protein [Agaricus bisporus var. bisporus H97, AGABI2DRAFT_211625]}	{NA}	{abv:AGABI2DRAFT211625; }	{NA}	{GO:0055114; oxidation-reduction process; biological_process GO:0020037; heme binding; molecular_function GO:0005506; iron ion binding; molecular_function GO:0016705; oxidoreductase activity, acting on paired donors, with incorporation or reduction of molecular oxygen; molecular_function}	{NA}
A00198	{CONTIG10:1123623:1124239:-}	{gi|597989321|ref|XP_007331806.1|; hypothetical protein [Agaricus bisporus var. burnettii JB137-S8, AGABI1DRAFT_86482]}	{NA}	{abp:AGABI1DRAFT86482; }	{NA}	{GO:0009073; aromatic amino acid family biosynthetic process; biological_process GO:0003856; 3-dehydroquinate synthase activity; molecular_function GO:0006298; mismatch repair; biological_process GO:0004519; endonuclease activity; molecular_function}	{NA}
A00199	{CONTIG10:1125802:1128104:-}	{gi|568440512|ref|XP_006455974.1|; hypothetical protein [Agaricus bisporus var. bisporus H97, AGABI2DRAFT_121882]}	{NA}	{abv:AGABI2DRAFT121882; }	{NA}	{GO:0005506; iron ion binding; molecular_function GO:0020037; heme binding; molecular_function GO:0055114; oxidation-reduction process; biological_process GO:0016705; oxidoreductase activity, acting on paired donors, with incorporation or reduction of molecular oxygen; molecular_function}	{NA}
A00200	{CONTIG10:1128441:1129702:+}	{gi|568440515|ref|XP_006455975.1|; hypothetical protein [Agaricus bisporus var. bisporus H97, AGABI2DRAFT_121883]}	{NA}	{abv:AGABI2DRAFT121883; }	{NA}	{GO:0005525; GTP binding; molecular_function}	{NA}
A00201	{CONTIG10:110161:111426:+}	{NA}	{NA}	{NA}	{NA}	{NA}	{NA}
A00202	{CONTIG10:1136876:1138487:+}	{gi|597989443|ref|XP_007331834.1|; hypothetical protein [Agaricus bisporus var. burnettii JB137-S8, AGABI1DRAFT_130265]}	{NA}	{abp:AGABI1DRAFT130265; }	{NA}	{GO:0046872; metal ion binding; molecular_function}	{NA}
A00203	{CONTIG10:1143892:1146125:+}	{gi|597989427|ref|XP_007331831.1|; hypothetical protein [Agaricus bisporus var. burnettii JB137-S8, AGABI1DRAFT_115134]}	{NA}	{abp:AGABI1DRAFT115134; }	{NA}	{GO:0005506; iron ion binding; molecular_function GO:0055114; oxidation-reduction process; biological_process GO:0020037; heme binding; molecular_function GO:0016705; oxidoreductase activity, acting on paired donors, with incorporation or reduction of molecular oxygen; molecular_function}	{NA}
A00204	{CONTIG10:1147191:1148666:-}	{gi|597989213|ref|XP_007331781.1|; hypothetical protein [Agaricus bisporus var. burnettii JB137-S8, AGABI1DRAFT_130203]}	{NA}	{abp:AGABI1DRAFT130203; }	{NA}	{NA}	{NA}
A00205	{CONTIG10:1150630:1156234:-}	{gi|597995639|ref|XP_007333322.1|; hypothetical protein [Agaricus bisporus var. burnettii JB137-S8, AGABI1DRAFT_45660]}	{NA}	{abp:AGABI1DRAFT45660; }	{NA}	{NA}	{NA}
A00206	{CONTIG10:1159207:1161267:+}	{gi|568444087|ref|XP_006457163.1|; hypothetical protein [Agaricus bisporus var. bisporus H97, AGABI2DRAFT_181495]}	{NA}	{abv:AGABI2DRAFT181495; }	{NA}	{NA}	{NA}
A00207	{CONTIG10:1165519:1166091:+}	{NA}	{NA}	{NA}	{NA}	{NA}	{NA}
A00208	{CONTIG10:1166197:1167658:+}	{NA}	{NA}	{NA}	{NA}	{NA}	{NA}
A00209	{CONTIG10:1171572:1172801:+}	{gi|598002979|ref|XP_007335073.1|; hypothetical protein AGABI1DRAFT_48259, partial [Agaricus bisporus var. burnettii JB137-S8]}	{NA}	{abp:AGABI1DRAFT47862; }	{NA}	{GO:0003723; RNA binding; molecular_function GO:0003964; RNA-directed DNA polymerase activity; molecular_function GO:0006278; RNA-dependent DNA replication; biological_process}	{NA}
A00210	{CONTIG10:1173850:1174179:+}	{NA}	{NA}	{NA}	{NA}	{NA}	{NA}
A00211	{CONTIG10:1176025:1176942:+}	{gi|568438724|ref|XP_006455379.1|; hypothetical protein [Agaricus bisporus var. bisporus H97, AGABI2DRAFT_121298]}	{NA}	{abv:AGABI2DRAFT121298; }	{NA}	{GO:0003676; nucleic acid binding; molecular_function GO:0008270; zinc ion binding; molecular_function}	{NA}
A00212	{CONTIG10:111576:112478:+}	{NA}	{NA}	{NA}	{NA}	{NA}	{NA}
A00213	{CONTIG10:1184548:1185225:+}	{gi|597997757|ref|XP_007333838.1|; hypothetical protein [Agaricus bisporus var. burnettii JB137-S8, AGABI1DRAFT_116330]}	{NA}	{abp:AGABI1DRAFT116330; }	{NA}	{NA}	{NA}
A00214	{CONTIG10:1185494:1186430:+}	{NA}	{NA}	{NA}	{NA}	{NA}	{NA}
A00215	{CONTIG10:1191684:1193336:-}	{gi|597988863|ref|XP_007331698.1|; hypothetical protein AGABI1DRAFT_43140, partial [Agaricus bisporus var. burnettii JB137-S8]}	{NA}	{abp:AGABI1DRAFT43140; K08994 yneE, BEST ion channel-forming bestrophin family protein -- }	{NA}	{NA}	{NA}
A00216	{CONTIG10:1195872:1196201:-}	{NA}	{NA}	{NA}	{NA}	{NA}	{NA}
A00217	{CONTIG10:1202430:1205201:+}	{gi|597989469|ref|XP_007331839.1|; hypothetical protein [Agaricus bisporus var. burnettii JB137-S8, AGABI1DRAFT_121963]}	{Q10179; SYG_SCHPO Putative glycine--tRNA ligase OS=Schizosaccharomyces pombe (strain 972 / ATCC 24843) GN=grs1 PE=3 SV=1}	{abp:AGABI1DRAFT121963; K01880 GARS, glyS1 glycyl-tRNA synthetase 6.1.1.14 Genetic Information Processing; Translation; Aminoacyl-tRNA biosynthesis [PATH:ko00970] }	{SPAC3F10.03; KOG2298 Glycyl-tRNA synthetase and related class II tRNA synthetase J Translation, ribosomal structure and biogenesis ;}	{GO:0000166; nucleotide binding; molecular_function GO:0005524; ATP binding; molecular_function GO:0004812; aminoacyl-tRNA ligase activity; molecular_function GO:0006418; tRNA aminoacylation for protein translation; biological_process}	{NA}
A00218	{CONTIG10:1210005:1210517:+}	{gi|568440549|ref|XP_006455986.1|; hypothetical protein [Agaricus bisporus var. bisporus H97, AGABI2DRAFT_138881]}	{NA}	{abv:AGABI2DRAFT138881; }	{NA}	{NA}	{NA}
A00219	{CONTIG10:1216828:1218986:-}	{gi|568440555|ref|XP_006455988.1|; hypothetical protein [Agaricus bisporus var. bisporus H97, AGABI2DRAFT_195265]}	{NA}	{abv:AGABI2DRAFT195265; }	{NA}	{NA}	{NA}
A00220	{CONTIG10:1221840:1222611:-}	{gi|568440564|ref|XP_006455991.1|; hypothetical protein [Agaricus bisporus var. bisporus H97, AGABI2DRAFT_227659]}	{NA}	{abp:AGABI1DRAFT77080; }	{NA}	{GO:0004733; pyridoxamine-phosphate oxidase activity; molecular_function GO:0055114; oxidation-reduction process; biological_process GO:0010181; FMN binding; molecular_function}	{NA}
A00221	{CONTIG10:1222901:1225422:+}	{gi|597988993|ref|XP_007331729.1|; hypothetical protein [Agaricus bisporus var. burnettii JB137-S8, AGABI1DRAFT_77081]}	{O42939; UBA2_SCHPO Ubiquitin-activating enzyme E1-like OS=Schizosaccharomyces pombe (strain 972 / ATCC 24843) GN=uba2 PE=1 SV=1}	{abp:AGABI1DRAFT77081; K10685 UBLE1B, SAE2, UBA2 ubiquitin-like 1-activating enzyme E1 B 6.2.1.45 Genetic Information Processing; Folding, sorting and degradation; Ubiquitin mediated proteolysis [PATH:ko04120] }	{SPBC16H5.03c; KOG2013 SMT3/SUMO-activating complex, catalytic component UBA2 O Posttranslational modification, protein turnover, chaperones ;}	{GO:0055114; oxidation-reduction process; biological_process GO:0003824; NA GO:0006779; porphyrin biosynthetic process; biological_process GO:0019354; siroheme biosynthetic process; biological_process GO:0043115; precorrin-2 dehydrogenase activity; molecular_function}	{NA}
A00222	{CONTIG10:1225935:1228565:-}	{gi|597982575|ref|XP_007330161.1|; hypothetical protein [Agaricus bisporus var. burnettii JB137-S8, AGABI1DRAFT_114063]}	{Q01772; GLOX_PHACH Aldehyde oxidase GLOX OS=Phanerochaete chrysosporium GN=GLX PE=1 SV=1}	{abp:AGABI1DRAFT114063; K20929 GLX glyoxal/methylglyoxal oxidase 1.2.3.15 }	{NA}	{NA}	{EIN08242.1_AA5; {PUNSTDRAFT_68820;--;Punctularia strigosozonata HHB-11173 SS5;--} Oxidase with oxygen as acceptor (EC 1.1.3.-); galactose oxidase (EC 1.1.3.9); glyoxal oxidase (EC 1.1.3.-) Family AA5 are copper radical oxidases and the family includes two subfamilies, namely AA5_1 and AA5_2 containing characterized glyoxal oxidase and galactose oxidase enzymes, respectively}
A00223	{CONTIG10:19260:22013:+}	{NA}	{NA}	{NA}	{NA}	{NA}	{NA}
A00224	{CONTIG10:112992:114401:+}	{gi|568452171|ref|XP_006459847.1|; hypothetical protein AGABI2DRAFT_66980, partial [Agaricus bisporus var. bisporus H97]}	{NA}	{abv:AGABI2DRAFT66980; }	{NA}	{NA}	{NA}
A00225	{CONTIG10:1229806:1230894:-}	{gi|597989513|ref|XP_007331850.1|; hypothetical protein [Agaricus bisporus var. burnettii JB137-S8, AGABI1DRAFT_115151]}	{NA}	{abp:AGABI1DRAFT115151; }	{NA}	{NA}	{NA}
A00226	{CONTIG10:1232381:1233559:-}	{gi|597989513|ref|XP_007331850.1|; hypothetical protein [Agaricus bisporus var. burnettii JB137-S8, AGABI1DRAFT_115151]}	{NA}	{abp:AGABI1DRAFT115151; }	{NA}	{GO:0005737; cytoplasm; cellular_component GO:0008899; homoserine O-succinyltransferase activity; molecular_function GO:0019281; L-methionine biosynthetic process from homoserine via O-succinyl-L-homoserine and cystathionine; biological_process}	{NA}
A00227	{CONTIG10:1244696:1245393:+}	{gi|568440579|ref|XP_006455998.1|; hypothetical protein [Agaricus bisporus var. bisporus H97, AGABI2DRAFT_195272]}	{NA}	{abv:AGABI2DRAFT195272; }	{NA}	{NA}	{NA}
A00228	{CONTIG10:1245451:1246645:-}	{gi|568440582|ref|XP_006455999.1|; hypothetical protein [Agaricus bisporus var. bisporus H97, AGABI2DRAFT_195273]}	{NA}	{abv:AGABI2DRAFT195273; }	{NA}	{NA}	{NA}
A00229	{CONTIG10:1248495:1249696:-}	{gi|597989513|ref|XP_007331850.1|; hypothetical protein [Agaricus bisporus var. burnettii JB137-S8, AGABI1DRAFT_115151]}	{NA}	{abp:AGABI1DRAFT115151; }	{NA}	{NA}	{NA}
A00230	{CONTIG10:1251522:1252709:-}	{gi|597989513|ref|XP_007331850.1|; hypothetical protein [Agaricus bisporus var. burnettii JB137-S8, AGABI1DRAFT_115151]}	{NA}	{abp:AGABI1DRAFT115151; }	{NA}	{NA}	{NA}
A00231	{CONTIG10:1254196:1255338:-}	{gi|597989513|ref|XP_007331850.1|; hypothetical protein [Agaricus bisporus var. burnettii JB137-S8, AGABI1DRAFT_115151]}	{NA}	{abp:AGABI1DRAFT115151; }	{NA}	{GO:0006541; glutamine metabolic process; biological_process GO:0016787; hydrolase activity; molecular_function}	{NA}
A00232	{CONTIG10:1256185:1257354:-}	{gi|597989513|ref|XP_007331850.1|; hypothetical protein [Agaricus bisporus var. burnettii JB137-S8, AGABI1DRAFT_115151]}	{NA}	{abp:AGABI1DRAFT115151; }	{NA}	{NA}	{NA}
A00233	{CONTIG10:1261587:1263886:+}	{gi|568440597|ref|XP_006456004.1|; hypothetical protein [Agaricus bisporus var. bisporus H97, AGABI2DRAFT_121909]}	{NA}	{abv:AGABI2DRAFT121909; }	{NA}	{GO:0050660; flavin adenine dinucleotide binding; molecular_function GO:0016614; oxidoreductase activity, acting on CH-OH group of donors; molecular_function GO:0055114; oxidation-reduction process; biological_process}	{NA}
A00234	{CONTIG10:1264375:1266462:+}	{gi|568440594|ref|XP_006456003.1|; hypothetical protein [Agaricus bisporus var. bisporus H97, AGABI2DRAFT_77669]}	{NA}	{abv:AGABI2DRAFT77669; }	{NA}	{NA}	{CCA67199.1_GT90; {PIIN_01031;--;Piriformospora indica (Pirin1);--} UDP-Xyl: (mannosyl) glucuronoxylomannan/galactoxylomannan &beta;-1,2-xylosyltransferase (EC 2.4.2.-); UDP-Glc: protein O-&beta;-glucosyltransferase (EC 2.4.1.-); UDP-Xyl: protein O-&beta;-xylosyltransferase (EC 2.4.2.-) Created from Klutts, Levery and Doering (2007) J. Biol. Chem. 282:17890-17899 (PMID: 17430900)}
A00235	{CONTIG10:115735:116427:+}	{NA}	{NA}	{NA}	{NA}	{NA}	{NA}
A00236	{CONTIG10:1269254:1270152:+}	{gi|597989525|ref|XP_007331853.1|; hypothetical protein [Agaricus bisporus var. burnettii JB137-S8, AGABI1DRAFT_115153]}	{P25613; ADY2_YEAST Accumulation of dyads protein 2 OS=Saccharomyces cerevisiae (strain ATCC 204508 / S288c) GN=ADY2 PE=1 SV=1}	{abp:AGABI1DRAFT115153; K07034 K07034 uncharacterized protein -- }	{NA}	{GO:0016020; membrane; cellular_component}	{NA}
A00237	{CONTIG10:1272112:1273120:+}	{gi|597989521|ref|XP_007331852.1|; hypothetical protein [Agaricus bisporus var. burnettii JB137-S8, AGABI1DRAFT_121976]}	{NA}	{abp:AGABI1DRAFT121976; K01771 plc 1-phosphatidylinositol phosphodiesterase 4.6.1.13 Metabolism; Carbohydrate metabolism; Inositol phosphate metabolism [PATH:ko00562] }	{NA}	{GO:0046422; violaxanthin de-epoxidase activity; molecular_function GO:0009507; chloroplast; cellular_component GO:0055114; oxidation-reduction process; biological_process}	{NA}
A00238	{CONTIG10:1274464:1275637:+}	{gi|597989513|ref|XP_007331850.1|; hypothetical protein [Agaricus bisporus var. burnettii JB137-S8, AGABI1DRAFT_115151]}	{NA}	{abp:AGABI1DRAFT115151; }	{NA}	{NA}	{NA}
A00239	{CONTIG10:1277297:1278476:+}	{gi|597989513|ref|XP_007331850.1|; hypothetical protein [Agaricus bisporus var. burnettii JB137-S8, AGABI1DRAFT_115151]}	{NA}	{abp:AGABI1DRAFT115151; }	{NA}	{GO:0016787; hydrolase activity; molecular_function GO:0006541; glutamine metabolic process; biological_process}	{NA}
A00240	{CONTIG10:1279971:1281059:+}	{gi|597989513|ref|XP_007331850.1|; hypothetical protein [Agaricus bisporus var. burnettii JB137-S8, AGABI1DRAFT_115151]}	{NA}	{abp:AGABI1DRAFT115151; }	{NA}	{NA}	{NA}
A00241	{CONTIG10:1282676:1283708:+}	{gi|597989513|ref|XP_007331850.1|; hypothetical protein [Agaricus bisporus var. burnettii JB137-S8, AGABI1DRAFT_115151]}	{NA}	{abp:AGABI1DRAFT115151; }	{NA}	{GO:0005737; cytoplasm; cellular_component GO:0008899; homoserine O-succinyltransferase activity; molecular_function GO:0019281; L-methionine biosynthetic process from homoserine via O-succinyl-L-homoserine and cystathionine; biological_process}	{NA}
A00242	{CONTIG10:1286332:1287527:+}	{gi|597989513|ref|XP_007331850.1|; hypothetical protein [Agaricus bisporus var. burnettii JB137-S8, AGABI1DRAFT_115151]}	{NA}	{abp:AGABI1DRAFT115151; }	{NA}	{NA}	{NA}
A00243	{CONTIG10:1294940:1296428:+}	{gi|568440615|ref|XP_006456010.1|; hypothetical protein [Agaricus bisporus var. bisporus H97, AGABI2DRAFT_121912]}	{NA}	{abv:AGABI2DRAFT121912; }	{NA}	{NA}	{NA}
A00244	{CONTIG10:1296831:1298877:-}	{gi|568440618|ref|XP_006456011.1|; hypothetical protein [Agaricus bisporus var. bisporus H97, AGABI2DRAFT_121913]}	{NA}	{abv:AGABI2DRAFT121913; K21403 PXYLP1 2-phosphoxylose phosphatase 3.1.3.- }	{NA}	{GO:0003993; acid phosphatase activity; molecular_function}	{NA}
A00245	{CONTIG10:1301117:1303551:+}	{gi|568440621|ref|XP_006456012.1|; hypothetical protein [Agaricus bisporus var. bisporus H97, AGABI2DRAFT_195282]}	{NA}	{abv:AGABI2DRAFT195282; K20929 GLX glyoxal/methylglyoxal oxidase 1.2.3.15 }	{NA}	{GO:0016021; integral to membrane; cellular_component}	{ABD61573.1_AA5; {copper radical oxidase (Cro2);--;Phanerochaete chrysosporium;--} Oxidase with oxygen as acceptor (EC 1.1.3.-); galactose oxidase (EC 1.1.3.9); glyoxal oxidase (EC 1.1.3.-) Family AA5 are copper radical oxidases and the family includes two subfamilies, namely AA5_1 and AA5_2 containing characterized glyoxal oxidase and galactose oxidase enzymes, respectively}
A00246	{CONTIG10:116521:117369:+}	{NA}	{NA}	{NA}	{NA}	{NA}	{NA}
A00247	{CONTIG10:1304236:1309164:+}	{gi|568440624|ref|XP_006456013.1|; glyoxal oxidase [Agaricus bisporus var. bisporus H97]}	{NA}	{abv:AGABI2DRAFT227686; K20929 GLX glyoxal/methylglyoxal oxidase 1.2.3.15 }	{NA}	{NA}	{ABD61573.1_AA5; {copper radical oxidase (Cro2);--;Phanerochaete chrysosporium;--} Oxidase with oxygen as acceptor (EC 1.1.3.-); galactose oxidase (EC 1.1.3.9); glyoxal oxidase (EC 1.1.3.-) Family AA5 are copper radical oxidases and the family includes two subfamilies, namely AA5_1 and AA5_2 containing characterized glyoxal oxidase and galactose oxidase enzymes, respectively}
A00248	{CONTIG10:1310352:1311385:-}	{gi|672823768|gb|KFH68661.1|; hypothetical protein [Mortierella verticillata NRRL 6337, MVEG_05470]}	{NA}	{afv:AFLA_062040; }	{NA}	{NA}	{NA}
A00249	{CONTIG10:1317489:1319295:+}	{gi|568440646|ref|XP_006456020.1|; hypothetical protein [Agaricus bisporus var. bisporus H97, AGABI2DRAFT_188101]}	{Q5A1M4; TRY3_CANAL Transcriptional regulator of yeast form adherence 3 OS=Candida albicans (strain SC5314 / ATCC MYA-2876) GN=TRY3 PE=2 SV=2}	{abv:AGABI2DRAFT188101; }	{NA}	{GO:0046872; metal ion binding; molecular_function GO:0008270; zinc ion binding; molecular_function GO:0005515; protein binding; molecular_function GO:0005680; anaphase-promoting complex; cellular_component GO:0004842; ubiquitin-protein ligase activity; molecular_function}	{NA}
A00250	{CONTIG10:1319637:1322290:-}	{gi|597989013|ref|XP_007331734.1|; hypothetical protein [Agaricus bisporus var. burnettii JB137-S8, AGABI1DRAFT_77122]}	{Q6NC66; RF1_RHOPA Peptide chain release factor 1 OS=Rhodopseudomonas palustris (strain ATCC BAA-98 / CGA009) GN=prfA PE=3 SV=1}	{abp:AGABI1DRAFT77122; K02835 prfA, MTRF1, MRF1 peptide chain release factor 1 -- }	{YGL143c; KOG2726 Mitochondrial polypeptide chain release factor J Translation, ribosomal structure and biogenesis ;}	{GO:0005737; cytoplasm; cellular_component GO:0016149; translation release factor activity, codon specific; molecular_function GO:0000155; two-component sensor activity; molecular_function GO:0000160; two-component signal transduction system (phosphorelay); biological_process GO:0005524; ATP binding; molecular_function GO:0003747; translation release factor activity; molecular_function GO:0006415…	{NA}
A00251	{CONTIG10:1322649:1329712:+}	{gi|597988931|ref|XP_007331714.1|; hypothetical protein [Agaricus bisporus var. burnettii JB137-S8, AGABI1DRAFT_61718]}	{P0CN27; DPOE_CRYNB DNA polymerase epsilon catalytic subunit A OS=Cryptococcus neoformans var. neoformans serotype D (strain B-3501A) GN=POL2 PE=3 SV=1}	{abp:AGABI1DRAFT61718; K02324 POLE DNA polymerase epsilon subunit 1 2.7.7.7 Metabolism; Nucleotide metabolism; Purine metabolism [PATH:ko00230] Metabolism; Nucleotide metabolism; Pyrimidine metabolism [PATH:ko00240] Genetic Information Processing; Replication and repair; DNA replication [PATH:ko03030] Genetic Information Processing; Replication and repair; Base excision repair [PATH:ko03410] Gene…	{SPBC25H2.13c; KOG1798 DNA polymerase epsilon, catalytic subunit A L Replication, recombination and repair ;}	{GO:0003887; DNA-directed DNA polymerase activity; molecular_function GO:0004129; cytochrome-c oxidase activity; molecular_function GO:0006260; DNA replication; biological_process GO:0009405; pathogenesis; biological_process GO:0008270; zinc ion binding; molecular_function GO:0005743; mitochondrial inner membrane; cellular_component GO:0005634; nucleus; cellular_component GO:0005576; NA GO:000367…	{NA}
A00252	{CONTIG10:1329842:1334037:-}	{gi|170114334|ref|XP_001888364.1|; predicted protein [Laccaria bicolor S238N-H82]}	{NA}	{NA}	{NA}	{GO:0055114; oxidation-reduction process; biological_process GO:0016616; oxidoreductase activity, acting on the CH-OH group of donors, NAD or NADP as acceptor; molecular_function GO:0006694; steroid biosynthetic process; biological_process GO:0003854; 3-beta-hydroxy-delta5-steroid dehydrogenase activity; molecular_function GO:0003824; NA GO:0044237; cellular metabolic process; biological_process …	{NA}
A00253	{CONTIG10:1334375:1336621:+}	{gi|568440658|ref|XP_006456024.1|; hypothetical protein [Agaricus bisporus var. bisporus H97, AGABI2DRAFT_188104]}	{Q9URY1; PPK16_SCHPO Serine/threonine-protein kinase ppk16 OS=Schizosaccharomyces pombe (strain 972 / ATCC 24843) GN=ppk16 PE=1 SV=1}	{abv:AGABI2DRAFT188104; }	{SPAC890.03; KOG0583 Serine/threonine protein kinase T Signal transduction mechanisms ;}	{GO:0016020; membrane; cellular_component GO:0005524; ATP binding; molecular_function GO:0004672; protein kinase activity; molecular_function GO:0006468; protein phosphorylation; biological_process GO:0016773; phosphotransferase activity, alcohol group as acceptor; molecular_function GO:0009103; lipopolysaccharide biosynthetic process; biological_process}	{NA}
A00254	{CONTIG10:1338649:1339410:+}	{NA}	{NA}	{NA}	{NA}	{GO:0016192; vesicle-mediated transport; biological_process GO:0016021; integral to membrane; cellular_component}	{NA}
A00255	{CONTIG10:1341042:1341661:-}	{gi|568440661|ref|XP_006456025.1|; hypothetical protein [Agaricus bisporus var. bisporus H97, AGABI2DRAFT_195293]}	{Q6FXY9; RL24_CANGA 60S ribosomal protein L24 OS=Candida glabrata (strain ATCC 2001 / CBS 138 / JCM 3761 / NBRC 0622 / NRRL Y-65) GN=RPL24 PE=3 SV=1}	{abv:AGABI2DRAFT195293; K02896 RP-L24e, RPL24 large subunit ribosomal protein L24e -- Genetic Information Processing; Translation; Ribosome [PATH:ko03010] }	{SPAC6G9.09c; KOG1722 60s ribosomal protein L24 J Translation, ribosomal structure and biogenesis ;}	{NA}	{NA}
A00256	{CONTIG10:1344193:1347743:-}	{gi|597989595|ref|XP_007331869.1|; hypothetical protein [Agaricus bisporus var. burnettii JB137-S8, AGABI1DRAFT_121992]}	{NA}	{abp:AGABI1DRAFT121992; K16732 PRC1 protein regulator of cytokinesis 1 -- }	{NA}	{GO:0000226; microtubule cytoskeleton organization; biological_process GO:0008017; microtubule binding; molecular_function GO:0000910; cytokinesis; biological_process}	{NA}
A00257	{CONTIG10:118236:124182:-}	{gi|691795486|emb|CDO69613.1|; hypothetical protein [Trametes cinnabarina, BN946_scf184851.g1]}	{NA}	{sla:SERLADRAFT_433232; }	{NA}	{GO:0003964; RNA-directed DNA polymerase activity; molecular_function GO:0003723; RNA binding; molecular_function GO:0015074; DNA integration; biological_process GO:0006278; RNA-dependent DNA replication; biological_process GO:0004553; hydrolase activity, hydrolyzing O-glycosyl compounds; molecular_function}	{NA}
A00258	{CONTIG10:1351241:1353243:-}	{gi|597989599|ref|XP_007331870.1|; hypothetical protein [Agaricus bisporus var. burnettii JB137-S8, AGABI1DRAFT_115172]}	{NA}	{abp:AGABI1DRAFT115172; }	{NA}	{GO:0016021; integral to membrane; cellular_component GO:0055085; transmembrane transport; biological_process}	{NA}
A00259	{CONTIG10:1353505:1355337:+}	{gi|597989603|ref|XP_007331871.1|; hypothetical protein [Agaricus bisporus var. burnettii JB137-S8, AGABI1DRAFT_108106]}	{NA}	{abp:AGABI1DRAFT108106; }	{NA}	{GO:0055114; oxidation-reduction process; biological_process GO:0016627; oxidoreductase activity, acting on the CH-CH group of donors; molecular_function}	{NA}
A00260	{CONTIG10:1363358:1364436:+}	{gi|568440686|ref|XP_006456033.1|; hypothetical protein [Agaricus bisporus var. bisporus H97, AGABI2DRAFT_227728]}	{Q5BG78; XGEA_EMENI Xyloglucan-specific endo-beta-1,4-glucanase A OS=Emericella nidulans (strain FGSC A4 / ATCC 38163 / CBS 112.46 / NRRL 194 / M139) GN=xgeA PE=1 SV=1}	{abv:AGABI2DRAFT227728; K18576 XEG xyloglucan-specific endo-beta-1,4-glucanase 3.2.1.151 }	{NA}	{GO:0000272; polysaccharide catabolic process; biological_process GO:0008810; cellulase activity; molecular_function}	{CDJ79826.1_GH12; {xyloglucanase (Xeg1);--;Leucoagaricus gongylophorus Ae322;--} endoglucanase (EC 3.2.1.4); xyloglucan hydrolase (EC 3.2.1.151); &beta;-1,3-1,4-glucanase (EC 3.2.1.73); xyloglucan endotransglycosylase (EC 2.4.1.207) formerly known as cellulase family H. }
A00261	{CONTIG10:1364848:1366777:-}	{gi|597989665|ref|XP_007331886.1|; hypothetical protein AGABI1DRAFT_122012, partial [Agaricus bisporus var. burnettii JB137-S8]}	{NA}	{abp:AGABI1DRAFT122012; K11979 UBR7 E3 ubiquitin-protein ligase UBR7 2.3.2.27 }	{NA}	{GO:0005515; protein binding; molecular_function}	{NA}
A00262	{CONTIG10:1366867:1370842:+}	{gi|597989661|ref|XP_007331885.1|; hypothetical protein [Agaricus bisporus var. burnettii JB137-S8, AGABI1DRAFT_115186]}	{NA}	{abp:AGABI1DRAFT115186; K01469 OPLAH, OXP1, oplAH 5-oxoprolinase (ATP-hydrolysing) 3.5.2.9 Metabolism; Metabolism of other amino acids; Glutathione metabolism [PATH:ko00480] }	{CE21627; KOG1939 Oxoprolinase E Amino acid transport and metabolism ;}	{GO:0003824; NA GO:0003779; actin binding; molecular_function}	{NA}
A00263	{CONTIG10:1371566:1371952:-}	{gi|597989651|ref|XP_007331883.1|; hypothetical protein [Agaricus bisporus var. burnettii JB137-S8, AGABI1DRAFT_115185]}	{NA}	{abp:AGABI1DRAFT115185; }	{NA}	{NA}	{NA}
A00264	{CONTIG10:1372187:1372957:-}	{gi|597989027|ref|XP_007331737.1|; hypothetical protein [Agaricus bisporus var. burnettii JB137-S8, AGABI1DRAFT_77172]}	{P60206; CALM_AJECG Calmodulin OS=Ajellomyces capsulatus (strain G186AR / H82 / ATCC MYA-2454 / RMSCC 2432) GN=CAM1 PE=2 SV=2}	{abp:AGABI1DRAFT77172; K02183 CALM calmodulin -- Environmental Information Processing; Signal transduction; Ras signaling pathway [PATH:ko04014] Environmental Information Processing; Signal transduction; Rap1 signaling pathway [PATH:ko04015] Environmental Information Processing; Signal transduction; MAPK signaling pathway - plant [PATH:ko04016] Environmental Information Processing; Signal transdu…	{SPAC3A12.14; KOG0027 Calmodulin and related proteins (EF-Hand superfamily) T Signal transduction mechanisms ;}	{GO:0003677; DNA binding; molecular_function GO:0005509; calcium ion binding; molecular_function GO:0007165; signal transduction; biological_process GO:0006275; regulation of DNA replication; biological_process GO:0005578; proteinaceous extracellular matrix; cellular_component}	{NA}
A00265	{CONTIG10:1373849:1374695:+}	{gi|122063211|sp|P84339.2|CALM_AGABI; Calmodulin [sp]}	{P84339; CALM_AGABI Calmodulin OS=Agaricus bisporus PE=1 SV=2}	{abp:AGABI1DRAFT86553; K02183 CALM calmodulin -- Environmental Information Processing; Signal transduction; Ras signaling pathway [PATH:ko04014] Environmental Information Processing; Signal transduction; Rap1 signaling pathway [PATH:ko04015] Environmental Information Processing; Signal transduction; MAPK signaling pathway - plant [PATH:ko04016] Environmental Information Processing; Signal transdu…	{Hs4502549; KOG0027 Calmodulin and related proteins (EF-Hand superfamily) T Signal transduction mechanisms ;}	{GO:0015159; polysaccharide transmembrane transporter activity; molecular_function GO:0007165; signal transduction; biological_process GO:0003899; DNA-directed RNA polymerase activity; molecular_function GO:0015774; polysaccharide transport; biological_process GO:0005509; calcium ion binding; molecular_function GO:0006351; transcription, DNA-dependent; biological_process GO:0016020; membrane; cel…	{NA}
A00266	{CONTIG10:1375673:1376079:-}	{gi|568440723|ref|XP_006456045.1|; NdufA2, NADH ubiquinone oxidoreductase 10. 5kD subunit [Agaricus bisporus var. burnettii JB137-S8]}	{Q07842; NDUA2_NEUCR NADH-ubiquinone oxidoreductase 10.5 kDa subunit OS=Neurospora crassa (strain ATCC 24698 / 74-OR23-1A / CBS 708.71 / DSM 1257 / FGSC 987) GN=nuo-10.5 PE=4 SV=1}	{abp:AGABI1DRAFT86552; K03946 NDUFA2 NADH dehydrogenase (ubiquinone) 1 alpha subcomplex subunit 2 -- Metabolism; Energy metabolism; Oxidative phosphorylation [PATH:ko00190] Organismal Systems; Nervous system; Retrograde endocannabinoid signaling [PATH:ko04723] Human Diseases; Endocrine and metabolic diseases; Non-alcoholic fatty liver disease (NAFLD) [PATH:ko04932] Human Diseases; Neurodegenerati…	{CE20339; KOG3446 NADH:ubiquinone oxidoreductase NDUFA2/B8 subunit C Energy production and conversion ;}	{NA}	{NA}
A00267	{CONTIG10:1376197:1377393:+}	{gi|597989021|ref|XP_007331736.1|; hypothetical protein [Agaricus bisporus var. burnettii JB137-S8, AGABI1DRAFT_77161]}	{NA}	{abp:AGABI1DRAFT77161; }	{NA}	{GO:0038032; NA}	{NA}
A00268	{CONTIG10:129274:129916:-}	{gi|597996597|ref|XP_007367428.1|; hypothetical protein DICSQDRAFT_44550, partial [Dichomitus squalens LYAD-421 SS1]}	{NA}	{dsq:DICSQDRAFT_44550; }	{NA}	{NA}	{NA}
A00269	{CONTIG10:1377876:1379664:+}	{gi|597989017|ref|XP_007331735.1|; hypothetical protein [Agaricus bisporus var. burnettii JB137-S8, AGABI1DRAFT_77158]}	{NA}	{abp:AGABI1DRAFT77158; }	{NA}	{GO:0055114; oxidation-reduction process; biological_process GO:0051920; peroxiredoxin activity; molecular_function}	{NA}
A00270	{CONTIG10:1382228:1383133:-}	{gi|597989635|ref|XP_007331879.1|; hypothetical protein AGABI1DRAFT_122004, partial [Agaricus bisporus var. burnettii JB137-S8]}	{NA}	{abp:AGABI1DRAFT122004; }	{NA}	{GO:0016592; mediator complex; cellular_component GO:0009435; NAD biosynthetic process; biological_process GO:0004514; nicotinate-nucleotide diphosphorylase (carboxylating) activity; molecular_function GO:0006357; regulation of transcription from RNA polymerase II promoter; biological_process GO:0001104; RNA polymerase II transcription cofactor activity; molecular_function}	{NA}
A00271	{CONTIG10:1383783:1387131:+}	{gi|597989631|ref|XP_007331878.1|; hypothetical protein [Agaricus bisporus var. burnettii JB137-S8, AGABI1DRAFT_122003]}	{NA}	{abp:AGABI1DRAFT122003; }	{NA}	{GO:0005506; iron ion binding; molecular_function GO:0055114; oxidation-reduction process; biological_process GO:0020037; heme binding; molecular_function GO:0016705; oxidoreductase activity, acting on paired donors, with incorporation or reduction of molecular oxygen; molecular_function}	{NA}
A00272	{CONTIG10:1387218:1388447:-}	{gi|597988939|ref|XP_007331716.1|; hypothetical protein [Agaricus bisporus var. burnettii JB137-S8, AGABI1DRAFT_61747]}	{NA}	{abp:AGABI1DRAFT61747; }	{NA}	{GO:0019013; viral nucleocapsid; cellular_component}	{NA}
A00273	{CONTIG10:1389640:1391448:+}	{gi|597989627|ref|XP_007331877.1|; hypothetical protein [Agaricus bisporus var. burnettii JB137-S8, AGABI1DRAFT_108111]}	{NA}	{abp:AGABI1DRAFT108111; K08900 BCS1 mitochondrial chaperone BCS1 -- }	{NA}	{NA}	{NA}
A00274	{CONTIG10:1393187:1399415:+}	{gi|597988935|ref|XP_007331715.1|; hypothetical protein [Agaricus bisporus var. burnettii JB137-S8, AGABI1DRAFT_61742]}	{B0D6H2; ARO1_LACBS Pentafunctional AROM polypeptide OS=Laccaria bicolor (strain S238N-H82 / ATCC MYA-4686) GN=LACBIDRAFT_233717 PE=3 SV=1}	{abp:AGABI1DRAFT61742; K13830 ARO1 pentafunctional AROM polypeptide 4.2.3.4 4.2.1.10 1.1.1.25 2.7.1.71 2.5.1.19 Metabolism; Amino acid metabolism; Phenylalanine, tyrosine and tryptophan biosynthesis [PATH:ko00400] }	{SPAC1834.02; KOG0692 Pentafunctional AROM protein E Amino acid transport and metabolism ;}	{GO:0009073; aromatic amino acid family biosynthetic process; biological_process GO:0003856; 3-dehydroquinate synthase activity; molecular_function GO:0004764; shikimate 5-dehydrogenase activity; molecular_function GO:0016765; transferase activity, transferring alkyl or aryl (other than methyl) groups; molecular_function GO:0003855; 3-dehydroquinate dehydratase activity; molecular_function GO:000…	{NA}
A00275	{CONTIG10:1399727:1402051:-}	{NA}	{NA}	{NA}	{NA}	{NA}	{NA}
A00276	{CONTIG10:1402174:1404690:+}	{gi|6821993|emb|CAB71007.1|; hypothetical protein [Agaricus bisporus]}	{NA}	{abv:AGABI2DRAFT77291; }	{NA}	{NA}	{NA}
A00277	{CONTIG10:1405340:1406061:-}	{NA}	{NA}	{NA}	{NA}	{NA}	{NA}
A00278	{CONTIG10:1406645:1407602:-}	{gi|568440747|ref|XP_006456053.1|; hypothetical protein [Agaricus bisporus var. bisporus H97, AGABI2DRAFT_195316]}	{Q01278; VATE_NEUCR V-type proton ATPase subunit E OS=Neurospora crassa (strain ATCC 24698 / 74-OR23-1A / CBS 708.71 / DSM 1257 / FGSC 987) GN=vma-4 PE=2 SV=1}	{abv:AGABI2DRAFT195316; K02150 ATPeV1E, ATP6E V-type H+-transporting ATPase subunit E -- Metabolism; Energy metabolism; Oxidative phosphorylation [PATH:ko00190] Cellular Processes; Transport and catabolism; Phagosome [PATH:ko04145] Environmental Information Processing; Signal transduction; mTOR signaling pathway [PATH:ko04150] Organismal Systems; Nervous system; Synaptic vesicle cycle [PATH:ko047…	{Hs4502317; KOG1664 Vacuolar H+-ATPase V1 sector, subunit E C Energy production and conversion ;}	{GO:0003723; RNA binding; molecular_function GO:0003968; RNA-directed RNA polymerase activity; molecular_function GO:0046961; proton-transporting ATPase activity, rotational mechanism; molecular_function GO:0015991; ATP hydrolysis coupled proton transport; biological_process GO:0006351; transcription, DNA-dependent; biological_process GO:0033178; proton-transporting two-sector ATPase complex, cat…	{NA}
A00279	{CONTIG10:130801:132404:-}	{NA}	{NA}	{NA}	{NA}	{NA}	{NA}
A00280	{CONTIG10:1407988:1408818:+}	{gi|630191837|ref|XP_007848806.1|; hypothetical protein [Moniliophthora roreri MCA 2997, Moror_10467]}	{NA}	{mrr:Moror_10467; }	{NA}	{NA}	{NA}
A00281	{CONTIG10:1409358:1413126:-}	{gi|597989691|ref|XP_007331892.1|; hypothetical protein [Agaricus bisporus var. burnettii JB137-S8, AGABI1DRAFT_130338]}	{NA}	{abp:AGABI1DRAFT130338; K01053 E3.1.1.17, gnl, RGN gluconolactonase 3.1.1.17 Metabolism; Carbohydrate metabolism; Pentose phosphate pathway [PATH:ko00030] Metabolism; Carbohydrate metabolism; Ascorbate and aldarate metabolism [PATH:ko00053] Metabolism; Xenobiotics biodegradation and metabolism; Caprolactam degradation [PATH:ko00930] }	{NA}	{GO:0016844; strictosidine synthase activity; molecular_function GO:0004064; arylesterase activity; molecular_function GO:0005515; protein binding; molecular_function GO:0009058; biosynthetic process; biological_process}	{NA}
A00282	{CONTIG10:1413967:1417587:-}	{gi|597989691|ref|XP_007331892.1|; hypothetical protein [Agaricus bisporus var. burnettii JB137-S8, AGABI1DRAFT_130338]}	{NA}	{abp:AGABI1DRAFT130338; K01053 E3.1.1.17, gnl, RGN gluconolactonase 3.1.1.17 Metabolism; Carbohydrate metabolism; Pentose phosphate pathway [PATH:ko00030] Metabolism; Carbohydrate metabolism; Ascorbate and aldarate metabolism [PATH:ko00053] Metabolism; Xenobiotics biodegradation and metabolism; Caprolactam degradation [PATH:ko00930] }	{NA}	{GO:0016844; strictosidine synthase activity; molecular_function GO:0004064; arylesterase activity; molecular_function GO:0009058; biosynthetic process; biological_process GO:0005515; protein binding; molecular_function}	{NA}
A00283	{CONTIG10:1420508:1421218:+}	{gi|568440782|ref|XP_006456061.1|; hypothetical protein [Agaricus bisporus var. bisporus H97, AGABI2DRAFT_188140]}	{O94523; ACO1_SCHPO Probable acyl-CoA desaturase OS=Schizosaccharomyces pombe (strain 972 / ATCC 24843) GN=SPCC1281.06c PE=3 SV=1}	{abv:AGABI2DRAFT188140; K00507 SCD, desC stearoyl-CoA desaturase (Delta-9 desaturase) 1.14.19.1 Metabolism; Lipid metabolism; Biosynthesis of unsaturated fatty acids [PATH:ko01040] Organismal Systems; Endocrine system; PPAR signaling pathway [PATH:ko03320] Environmental Information Processing; Signal transduction; AMPK signaling pathway [PATH:ko04152] Organismal Systems; Aging; Longevity regulati…	{NA}	{GO:0020037; heme binding; molecular_function}	{NA}
A00284	{CONTIG10:1424402:1426726:-}	{gi|568440762|ref|XP_006456058.1|; hypothetical protein [Agaricus bisporus var. bisporus H97, AGABI2DRAFT_227791]}	{NA}	{abv:AGABI2DRAFT227791; K09704 K09704 uncharacterized protein -- }	{NA}	{NA}	{CCT70783.1_GH125; {FFUJ_06448;--;Fusarium fujikuroi IMI 58289 (Fusfu1);--} exo-&alpha;-1,6-mannosidase (EC 3.2.1.-) Created after Gregg, Zandberg, Hehemann, Whitworth, Deng, Vocadlo & Boraston (2011) J Biol Chem 286:15586-96 [PMID:21388958]}
A00285	{CONTIG10:1428192:1430923:+}	{gi|597989699|ref|XP_007331894.1|; hypothetical protein [Agaricus bisporus var. burnettii JB137-S8, AGABI1DRAFT_115196]}	{C8VG90; ACON_EMENI Aconitate hydratase, mitochondrial OS=Emericella nidulans (strain FGSC A4 / ATCC 38163 / CBS 112.46 / NRRL 194 / M139) GN=acoA PE=2 SV=1}	{abp:AGABI1DRAFT115196; K01681 ACO, acnA aconitate hydratase 4.2.1.3 }	{SPAC24C9.06c; KOG0453 Aconitase/homoaconitase (aconitase superfamily) CE Energy production and conversion ; Amino acid transport and metabolism ;}	{GO:0008152; NA}	{NA}
A00286	{CONTIG10:1436619:1437194:-}	{gi|568440791|ref|XP_006456064.1|; hypothetical protein [Agaricus bisporus var. bisporus H97, AGABI2DRAFT_121965]}	{NA}	{abv:AGABI2DRAFT121965; K15325 SEN15 tRNA-splicing endonuclease subunit Sen15, fungi type -- }	{NA}	{NA}	{NA}
A00287	{CONTIG10:1437458:1443505:-}	{gi|568440797|ref|XP_006456066.1|; hypothetical protein [Agaricus bisporus var. bisporus H97, AGABI2DRAFT_210807]}	{NA}	{abv:AGABI2DRAFT210807; K14679 TRL1 tRNA ligase 6.5.1.3 }	{NA}	{GO:0006388; tRNA splicing, via endonucleolytic cleavage and ligation; biological_process GO:0005524; ATP binding; molecular_function GO:0003824; NA GO:0003972; RNA ligase (ATP) activity; molecular_function}	{NA}
A00288	{CONTIG10:1444977:1445625:-}	{gi|599109526|ref|XP_007383919.1|; aado/keto reductase [Punctularia strigosozonata HHB-11173 SS5]}	{Q84TF0; AKRCA_ARATH Aldo-keto reductase family 4 member C10 OS=Arabidopsis thaliana GN=AKR4C10 PE=1 SV=1}	{psq:PUNSTDRAFT_143761; }	{At2g37770; KOG1577 Aldo/keto reductase family proteins R General function prediction only ;}	{NA}	{NA}
A00289	{CONTIG10:1445713:1447611:+}	{gi|618814815|ref|XP_007310030.1|; N-anthranilate isomerase [Stereum hirsutum FP-91666 SS1]}	{P25170; TRPG_PHACH Multifunctional tryptophan biosynthesis protein OS=Phanerochaete chrysosporium GN=TRPC PE=3 SV=1}	{psq:PUNSTDRAFT_105798; K13501 TRP1 anthranilate synthase / indole-3-glycerol phosphate synthase / phosphoribosylanthranilate isomerase 4.1.3.27 4.1.1.48 5.3.1.24 Metabolism; Amino acid metabolism; Phenylalanine, tyrosine and tryptophan biosynthesis [PATH:ko00400] }	{SPBC1539.09c_2; KOG4201 Anthranilate synthase component II E Amino acid transport and metabolism ;}	{GO:0004640; phosphoribosylanthranilate isomerase activity; molecular_function GO:0006051; N-acetylmannosamine metabolic process; biological_process GO:0006568; tryptophan metabolic process; biological_process GO:0047465; N-acylglucosamine-6-phosphate 2-epimerase activity; molecular_function GO:0004425; indole-3-glycerol-phosphate synthase activity; molecular_function GO:0004514; nicotinate-nucle…	{NA}
A00290	{CONTIG10:136702:137262:-}	{NA}	{NA}	{NA}	{NA}	{NA}	{NA}
A00291	{CONTIG10:1452178:1454629:+}	{gi|568440809|ref|XP_006456070.1|; hypothetical protein [Agaricus bisporus var. bisporus H97, AGABI2DRAFT_188151]}	{NA}	{abv:AGABI2DRAFT188151; K16569 TUBGCP2, GCP2 gamma-tubulin complex component 2 -- }	{NA}	{GO:0005815; microtubule organizing center; cellular_component GO:0000922; spindle pole; cellular_component GO:0000226; microtubule cytoskeleton organization; biological_process}	{NA}
A00292	{CONTIG10:1454907:1455861:+}	{gi|568440811|ref|XP_006456071.1|; hypothetical protein [Agaricus bisporus var. bisporus H97, AGABI2DRAFT_195337]}	{NA}	{abv:AGABI2DRAFT195337; K14022 CUE1, KIS4 coupling of ubiquitin conjugation to ER degradation protein 1 -- Genetic Information Processing; Folding, sorting and degradation; Protein processing in endoplasmic reticulum [PATH:ko04141] }	{NA}	{GO:0005515; protein binding; molecular_function}	{NA}
A00293	{CONTIG10:1456878:1457943:+}	{gi|597989723|ref|XP_007331900.1|; hypothetical protein [Agaricus bisporus var. burnettii JB137-S8, AGABI1DRAFT_86579]}	{NA}	{abp:AGABI1DRAFT86579; }	{NA}	{NA}	{NA}
A00294	{CONTIG10:1462712:1466431:-}	{gi|170114412|ref|XP_001888403.1|; predicted protein [Laccaria bicolor S238N-H82]}	{NA}	{sla:SERLADRAFT_450493; K21989 TMEM63 calcium permeable stress-gated cation channel -- }	{NA}	{GO:0016020; membrane; cellular_component}	{NA}
A00295	{CONTIG10:1466775:1468354:+}	{gi|568440829|ref|XP_006456077.1|; hypothetical protein AGABI1DRAFT_115213, partial [Agaricus bisporus var. burnettii JB137-S8]}	{I1RNL0; C9MT2_GIBZE Sphingolipid C9-methyltransferase 2 OS=Gibberella zeae (strain PH-1 / ATCC MYA-4620 / FGSC 9075 / NRRL 31084) GN=MT2 PE=3 SV=1}	{abp:AGABI1DRAFT115213; K20238 E2.1.1.317 sphingolipid C9-methyltransferase 2.1.1.317 }	{NA}	{GO:0004719; protein-L-isoaspartate (D-aspartate) O-methyltransferase activity; molecular_function GO:0018024; histone-lysine N-methyltransferase activity; molecular_function GO:0006464; protein modification process; biological_process GO:0008610; lipid biosynthetic process; biological_process GO:0008152; NA GO:0008168; methyltransferase activity; molecular_function}	{NA}
A00296	{CONTIG10:1468740:1471009:+}	{gi|568440832|ref|XP_006456078.1|; hypothetical protein [Agaricus bisporus]}	{Q5KPJ5; ILVB_CRYNJ Acetolactate synthase, mitochondrial OS=Cryptococcus neoformans var. neoformans serotype D (strain JEC21 / ATCC MYA-565) GN=ILV2 PE=3 SV=1}	{abp:AGABI1DRAFT77233; K01652 E2.2.1.6L, ilvB, ilvG, ilvI acetolactate synthase I/II/III large subunit 2.2.1.6 }	{SPBP35G2.07; KOG4166 Thiamine pyrophosphate-requiring enzyme EH Amino acid transport and metabolism ; Coenzyme transport and metabolism ;}	{GO:0000287; magnesium ion binding; molecular_function GO:0030976; thiamine pyrophosphate binding; molecular_function GO:0003824; NA}	{NA}
A00297	{CONTIG10:1472218:1474633:-}	{gi|403414018|emb|CCM00718.1|; predicted protein [Fibroporia radiculosa]}	{NA}	{npa:UCRNP2_3831; }	{NA}	{GO:0008152; NA GO:0003824; NA}	{NA}
A00298	{CONTIG10:1474797:1478903:+}	{gi|568464699|ref|XP_006463993.1|; hypothetical protein [Agaricus bisporus var. bisporus H97, AGABI2DRAFT_187407]}	{Q5N1G1; SYI_SYNP6 Isoleucine--tRNA ligase OS=Synechococcus sp. (strain ATCC 27144 / PCC 6301 / SAUG 1402/1) GN=ileS PE=3 SV=1}	{abv:AGABI2DRAFT187407; K01870 IARS, ileS isoleucyl-tRNA synthetase 6.1.1.5 Genetic Information Processing; Translation; Aminoacyl-tRNA biosynthesis [PATH:ko00970] }	{NA}	{GO:0000166; nucleotide binding; molecular_function GO:0006418; tRNA aminoacylation for protein translation; biological_process GO:0004812; aminoacyl-tRNA ligase activity; molecular_function GO:0005524; ATP binding; molecular_function}	{NA}
A00299	{CONTIG10:1481687:1481917:-}	{NA}	{NA}	{NA}	{NA}	{NA}	{NA}
A00300	{CONTIG10:1482850:1483641:-}	{gi|568464864|ref|XP_006464048.1|; hypothetical protein AGABI2DRAFT_51604, partial [Agaricus bisporus var. bisporus H97]}	{NA}	{abv:AGABI2DRAFT51604; }	{NA}	{GO:0016021; integral to membrane; cellular_component}	{NA}
A00301	{CONTIG10:138304:138963:-}	{gi|568450191|ref|XP_006459188.1|; hypothetical protein [Agaricus bisporus var. bisporus H97, AGABI2DRAFT_116162]}	{NA}	{abv:AGABI2DRAFT116162; }	{NA}	{GO:0008270; zinc ion binding; molecular_function GO:0016021; integral to membrane; cellular_component GO:0003676; nucleic acid binding; molecular_function}	{NA}
A00302	{CONTIG10:1486792:1487130:+}	{NA}	{NA}	{NA}	{NA}	{NA}	{NA}
A00303	{CONTIG10:1487161:1488075:+}	{gi|598003919|ref|XP_007335287.1|; hypothetical protein AGABI1DRAFT_133666, partial [Agaricus bisporus var. burnettii JB137-S8]}	{NA}	{abv:AGABI2DRAFT116132; }	{NA}	{NA}	{NA}
A00304	{CONTIG10:1489452:1490108:+}	{gi|598007137|ref|XP_007336119.1|; hypothetical protein AGABI1DRAFT_135259, partial [Agaricus bisporus var. burnettii JB137-S8]}	{NA}	{abp:AGABI1DRAFT130361; }	{NA}	{GO:0046983; protein dimerization activity; molecular_function GO:0008270; zinc ion binding; molecular_function}	{NA}
A00305	{CONTIG10:1491999:1492586:+}	{gi|336376451|gb|EGO04786.1|; hypothetical protein [Serpula lacrymans var. lacrymans S7.3, SERLA73DRAFT_82501]}	{NA}	{NA}	{NA}	{NA}	{NA}
A00306	{CONTIG10:1492914:1494420:+}	{gi|598002669|ref|XP_007335013.1|; hypothetical protein [Agaricus bisporus var. burnettii JB137-S8, AGABI1DRAFT_48154]}	{NA}	{sla:SERLADRAFT_346511; }	{NA}	{GO:0000398; nuclear mRNA splicing, via spliceosome; biological_process GO:0005681; spliceosomal complex; cellular_component}	{NA}
A00307	{CONTIG10:1497823:1498623:+}	{gi|597991479|ref|XP_007332323.1|; hypothetical protein [Agaricus bisporus var. burnettii JB137-S8, AGABI1DRAFT_93686]}	{NA}	{abp:AGABI1DRAFT93686; }	{NA}	{NA}	{NA}
A00308	{CONTIG10:1499253:1502438:+}	{gi|630225320|ref|XP_007859699.1|; hypothetical protein [Moniliophthora roreri MCA 2997, Moror_7616]}	{NA}	{mrr:Moror_17137; }	{NA}	{GO:0003723; RNA binding; molecular_function GO:0003964; RNA-directed DNA polymerase activity; molecular_function GO:0006278; RNA-dependent DNA replication; biological_process GO:0015074; DNA integration; biological_process}	{NA}
A00309	{CONTIG10:1506735:1508420:-}	{gi|568438800|ref|XP_006455404.1|; hypothetical protein [Agaricus bisporus var. bisporus H97, AGABI2DRAFT_75630]}	{NA}	{abv:AGABI2DRAFT75630; }	{NA}	{NA}	{NA}
A00310	{CONTIG10:1509299:1511021:-}	{gi|598003569|ref|XP_007335200.1|; hypothetical protein [Agaricus bisporus var. burnettii JB137-S8, AGABI1DRAFT_133560]}	{NA}	{abv:AGABI2DRAFT176738; }	{NA}	{NA}	{NA}
A00311	{CONTIG10:1511734:1512621:+}	{NA}	{NA}	{NA}	{NA}	{NA}	{NA}
A00312	{CONTIG10:142673:143446:+}	{gi|598003803|ref|XP_007335258.1|; hypothetical protein [Agaricus bisporus var. burnettii JB137-S8, AGABI1DRAFT_133631]}	{NA}	{abp:AGABI1DRAFT130835; }	{NA}	{NA}	{NA}
A00313	{CONTIG10:1513796:1514428:-}	{gi|598002965|ref|XP_007335070.1|; hypothetical protein [Agaricus bisporus var. burnettii JB137-S8, AGABI1DRAFT_48258]}	{NA}	{psq:PUNSTDRAFT_59270; }	{NA}	{NA}	{NA}
A00314	{CONTIG10:1516379:1518578:-}	{gi|598002965|ref|XP_007335070.1|; hypothetical protein [Agaricus bisporus var. burnettii JB137-S8, AGABI1DRAFT_48258]}	{NA}	{abv:AGABI2DRAFT58688; }	{NA}	{NA}	{NA}
A00315	{CONTIG10:1520165:1521840:+}	{gi|598002863|ref|XP_007335052.1|; hypothetical protein AGABI1DRAFT_48233, partial [Agaricus bisporus var. burnettii JB137-S8]}	{NA}	{mpr:MPER_12841; }	{NA}	{NA}	{NA}
A00316	{CONTIG10:1521942:1522850:+}	{gi|598007137|ref|XP_007336119.1|; hypothetical protein AGABI1DRAFT_135259, partial [Agaricus bisporus var. burnettii JB137-S8]}	{NA}	{abp:AGABI1DRAFT130361; }	{NA}	{GO:0008270; zinc ion binding; molecular_function GO:0046983; protein dimerization activity; molecular_function}	{NA}
A00317	{CONTIG10:1523762:1525620:+}	{gi|568447691|ref|XP_006458361.1|; hypothetical protein [Agaricus bisporus var. bisporus H97, AGABI2DRAFT_176738]}	{NA}	{abv:AGABI2DRAFT176738; }	{NA}	{NA}	{NA}
A00318	{CONTIG10:1529156:1530931:-}	{gi|568464440|ref|XP_006463909.1|; hypothetical protein [Agaricus bisporus var. bisporus H97, AGABI2DRAFT_120715]}	{NA}	{abv:AGABI2DRAFT120715; }	{NA}	{NA}	{NA}
A00319	{CONTIG10:1534709:1537046:-}	{NA}	{NA}	{NA}	{NA}	{NA}	{NA}
A00320	{CONTIG10:1538643:1539649:-}	{NA}	{NA}	{NA}	{NA}	{NA}	{NA}
A00321	{CONTIG10:1543565:1544180:+}	{gi|170088581|ref|XP_001875513.1|; predicted protein [Laccaria bicolor S238N-H82]}	{NA}	{lbc:LACBIDRAFT_308400; }	{NA}	{NA}	{NA}
A00322	{CONTIG10:1549075:1549869:+}	{NA}	{NA}	{NA}	{NA}	{GO:0000398; nuclear mRNA splicing, via spliceosome; biological_process GO:0005681; spliceosomal complex; cellular_component}	{NA}
A00323	{CONTIG10:143936:144859:+}	{gi|630212225|ref|XP_007855430.1|; reverse transcriptase-rnase h-integrase [Moniliophthora roreri MCA 2997]}	{NA}	{mpr:MPER_11066; }	{NA}	{NA}	{NA}
A00324	{CONTIG10:1550606:1551487:+}	{gi|598007137|ref|XP_007336119.1|; hypothetical protein AGABI1DRAFT_135259, partial [Agaricus bisporus var. burnettii JB137-S8]}	{NA}	{abp:AGABI1DRAFT130361; }	{NA}	{GO:0003676; nucleic acid binding; molecular_function GO:0008270; zinc ion binding; molecular_function}	{NA}
A00325	{CONTIG10:1551850:1554537:+}	{gi|598002863|ref|XP_007335052.1|; hypothetical protein AGABI1DRAFT_48233, partial [Agaricus bisporus var. burnettii JB137-S8]}	{NA}	{abv:AGABI2DRAFT176739; }	{NA}	{GO:0015074; DNA integration; biological_process}	{NA}
A00326	{CONTIG10:1556414:1559599:-}	{gi|630225320|ref|XP_007859699.1|; hypothetical protein [Moniliophthora roreri MCA 2997, Moror_7616]}	{NA}	{mrr:Moror_17137; }	{NA}	{GO:0015074; DNA integration; biological_process GO:0006278; RNA-dependent DNA replication; biological_process GO:0003723; RNA binding; molecular_function GO:0003964; RNA-directed DNA polymerase activity; molecular_function}	{NA}
A00327	{CONTIG10:1560229:1561029:-}	{gi|597991479|ref|XP_007332323.1|; hypothetical protein [Agaricus bisporus var. burnettii JB137-S8, AGABI1DRAFT_93686]}	{NA}	{abp:AGABI1DRAFT93686; }	{NA}	{NA}	{NA}
A00328	{CONTIG10:1564057:1566003:-}	{gi|598004335|ref|XP_007335385.1|; hypothetical protein AGABI1DRAFT_133795, partial [Agaricus bisporus var. burnettii JB137-S8]}	{NA}	{abv:AGABI2DRAFT114622; }	{NA}	{NA}	{NA}
A00329	{CONTIG10:1566847:1567602:-}	{gi|598001835|ref|XP_007334816.1|; hypothetical protein AGABI1DRAFT_47765, partial [Agaricus bisporus var. burnettii JB137-S8]}	{NA}	{abp:AGABI1DRAFT47765; }	{NA}	{GO:0005634; nucleus; cellular_component GO:0006351; transcription, DNA-dependent; biological_process GO:0003899; DNA-directed RNA polymerase activity; molecular_function}	{NA}
A00330	{CONTIG10:1569158:1572988:-}	{gi|598002863|ref|XP_007335052.1|; hypothetical protein AGABI1DRAFT_48233, partial [Agaricus bisporus var. burnettii JB137-S8]}	{NA}	{abv:AGABI2DRAFT176739; }	{NA}	{GO:0015074; DNA integration; biological_process}	{NA}
A00331	{CONTIG10:1573535:1575436:-}	{gi|568450140|ref|XP_006459171.1|; hypothetical protein [Agaricus bisporus var. bisporus H97, AGABI2DRAFT_116132]}	{NA}	{abv:AGABI2DRAFT116132; }	{NA}	{NA}	{NA}
A00332	{CONTIG10:1575467:1575850:-}	{gi|598007273|ref|XP_007336153.1|; hypothetical protein AGABI1DRAFT_135355, partial [Agaricus bisporus var. burnettii JB137-S8]}	{NA}	{abv:AGABI2DRAFT63009; }	{NA}	{NA}	{NA}
A00333	{CONTIG10:1576460:1577512:+}	{gi|598007137|ref|XP_007336119.1|; hypothetical protein AGABI1DRAFT_135259, partial [Agaricus bisporus var. burnettii JB137-S8]}	{NA}	{abp:AGABI1DRAFT130361; }	{NA}	{NA}	{NA}
A00334	{CONTIG10:23450:24955:-}	{NA}	{NA}	{NA}	{NA}	{GO:0005515; protein binding; molecular_function}	{NA}
A00335	{CONTIG10:144902:145684:+}	{gi|691784738|emb|CDO77880.1|; hypothetical protein [Trametes cinnabarina, BN946_scf184690.g1]}	{NA}	{NA}	{NA}	{GO:0006278; RNA-dependent DNA replication; biological_process GO:0003964; RNA-directed DNA polymerase activity; molecular_function GO:0003723; RNA binding; molecular_function}	{NA}
A00336	{CONTIG10:1578873:1584047:+}	{gi|353244408|emb|CCA75805.1|; hypothetical protein [Piriformospora indica DSM 11827, PIIN_09793]}	{NA}	{NA}	{NA}	{GO:0015074; DNA integration; biological_process}	{NA}
A00337	{CONTIG10:1587072:1590302:-}	{gi|598002863|ref|XP_007335052.1|; hypothetical protein AGABI1DRAFT_48233, partial [Agaricus bisporus var. burnettii JB137-S8]}	{NA}	{abv:AGABI2DRAFT176739; }	{NA}	{GO:0015074; DNA integration; biological_process}	{NA}
A00338	{CONTIG10:1590513:1592363:-}	{gi|568437222|ref|XP_006454880.1|; hypothetical protein [Agaricus bisporus var. bisporus H97, AGABI2DRAFT_114626]}	{NA}	{abv:AGABI2DRAFT114626; }	{NA}	{NA}	{NA}
A00339	{CONTIG10:1592435:1593577:-}	{gi|597934008|ref|XP_007321348.1|; hypothetical protein [Serpula lacrymans var. lacrymans S7.9, SERLADRAFT_440815]}	{NA}	{sla:SERLADRAFT_440815; }	{NA}	{GO:0046983; protein dimerization activity; molecular_function GO:0008270; zinc ion binding; molecular_function}	{NA}
A00340	{CONTIG10:1593773:1595323:-}	{gi|598004335|ref|XP_007335385.1|; hypothetical protein AGABI1DRAFT_133795, partial [Agaricus bisporus var. burnettii JB137-S8]}	{NA}	{abv:AGABI2DRAFT116798; }	{NA}	{NA}	{NA}
A00341	{CONTIG10:1595980:1598053:+}	{gi|568447700|ref|XP_006458364.1|; hypothetical protein [Agaricus bisporus var. bisporus H97, AGABI2DRAFT_176739]}	{NA}	{abv:AGABI2DRAFT176739; }	{NA}	{NA}	{NA}
A00342	{CONTIG10:1598461:1600818:+}	{gi|568447700|ref|XP_006458364.1|; hypothetical protein [Agaricus bisporus var. bisporus H97, AGABI2DRAFT_176739]}	{NA}	{abv:AGABI2DRAFT176739; }	{NA}	{GO:0015074; DNA integration; biological_process}	{NA}
A00343	{CONTIG10:1601263:1602979:+}	{gi|695569325|ref|XP_009550611.1|; hypothetical protein HETIRDRAFT_216527, partial [Heterobasidion irregulare TC 32-1]}	{NA}	{abv:AGABI2DRAFT176739; }	{NA}	{NA}	{NA}
A00344	{CONTIG10:1603297:1605039:-}	{gi|568450140|ref|XP_006459171.1|; hypothetical protein [Agaricus bisporus var. bisporus H97, AGABI2DRAFT_116132]}	{NA}	{abv:AGABI2DRAFT116132; }	{NA}	{NA}	{NA}
A00345	{CONTIG10:1607996:1611694:-}	{gi|568459624|ref|XP_006462323.1|; hypothetical protein AGABI2DRAFT_47493, partial [Agaricus bisporus var. bisporus H97]}	{NA}	{abv:AGABI2DRAFT47493; }	{NA}	{NA}	{NA}
A00346	{CONTIG10:146081:146746:+}	{gi|568447661|ref|XP_006458351.1|; hypothetical protein AGABI2DRAFT_58703, partial [Agaricus bisporus var. bisporus H97]}	{NA}	{abv:AGABI2DRAFT58703; }	{NA}	{GO:0006413; translational initiation; biological_process GO:0015074; DNA integration; biological_process GO:0003743; translation initiation factor activity; molecular_function}	{NA}
A00347	{CONTIG10:1613993:1617426:+}	{NA}	{NA}	{NA}	{NA}	{NA}	{NA}
A00348	{CONTIG10:1620737:1622188:+}	{gi|598002863|ref|XP_007335052.1|; hypothetical protein AGABI1DRAFT_48233, partial [Agaricus bisporus var. burnettii JB137-S8]}	{NA}	{abv:AGABI2DRAFT120694; }	{NA}	{NA}	{NA}
A00349	{CONTIG10:1622613:1624100:-}	{gi|568450140|ref|XP_006459171.1|; hypothetical protein [Agaricus bisporus var. bisporus H97, AGABI2DRAFT_116132]}	{NA}	{abv:AGABI2DRAFT116132; }	{NA}	{NA}	{NA}
A00350	{CONTIG10:1628015:1631446:-}	{NA}	{NA}	{NA}	{NA}	{NA}	{NA}
A00351	{CONTIG10:1633699:1637443:+}	{gi|568459624|ref|XP_006462323.1|; hypothetical protein AGABI2DRAFT_47493, partial [Agaricus bisporus var. bisporus H97]}	{NA}	{abv:AGABI2DRAFT47493; }	{NA}	{NA}	{NA}
A00352	{CONTIG10:1643065:1643877:-}	{NA}	{NA}	{NA}	{NA}	{NA}	{NA}
A00353	{CONTIG10:1644532:1648831:+}	{gi|598002863|ref|XP_007335052.1|; hypothetical protein AGABI1DRAFT_48233, partial [Agaricus bisporus var. burnettii JB137-S8]}	{NA}	{abv:AGABI2DRAFT176739; }	{NA}	{GO:0015074; DNA integration; biological_process}	{NA}
A00354	{CONTIG10:147876:148586:+}	{NA}	{NA}	{NA}	{NA}	{NA}	{NA}
A00355	{CONTIG10:152329:154401:-}	{gi|648160982|gb|KDR74693.1|; hypothetical protein [Galerina marginata CBS 339.88, GALMADRAFT_227140]}	{NA}	{cci:CC1G_11002; }	{NA}	{NA}	{NA}
A00356	{CONTIG10:164181:164866:+}	{gi|598002965|ref|XP_007335070.1|; hypothetical protein [Agaricus bisporus var. burnettii JB137-S8, AGABI1DRAFT_48258]}	{NA}	{abv:AGABI2DRAFT58688; }	{NA}	{NA}	{NA}
A00357	{CONTIG10:166755:167438:-}	{gi|598007137|ref|XP_007336119.1|; hypothetical protein AGABI1DRAFT_135259, partial [Agaricus bisporus var. burnettii JB137-S8]}	{NA}	{abv:AGABI2DRAFT116129; }	{NA}	{GO:0003676; nucleic acid binding; molecular_function GO:0008270; zinc ion binding; molecular_function}	{NA}
A00358	{CONTIG10:177103:179847:-}	{gi|568450140|ref|XP_006459171.1|; hypothetical protein [Agaricus bisporus var. bisporus H97, AGABI2DRAFT_116132]}	{NA}	{abv:AGABI2DRAFT116132; }	{NA}	{NA}	{NA}
A00359	{CONTIG10:183006:183974:-}	{gi|568450140|ref|XP_006459171.1|; hypothetical protein [Agaricus bisporus var. bisporus H97, AGABI2DRAFT_116132]}	{NA}	{abv:AGABI2DRAFT116132; }	{NA}	{NA}	{NA}
A00360	{CONTIG10:186403:188211:-}	{gi|568437222|ref|XP_006454880.1|; hypothetical protein [Agaricus bisporus var. bisporus H97, AGABI2DRAFT_114626]}	{NA}	{abv:AGABI2DRAFT114626; }	{NA}	{NA}	{NA}
A00361	{CONTIG10:188233:189617:-}	{gi|568440026|ref|XP_006455811.1|; hypothetical protein [Agaricus bisporus var. bisporus H97, AGABI2DRAFT_121727]}	{NA}	{abv:AGABI2DRAFT121727; }	{NA}	{NA}	{NA}
A00362	{CONTIG10:27237:29839:-}	{NA}	{NA}	{NA}	{NA}	{GO:0004672; protein kinase activity; molecular_function GO:0009103; lipopolysaccharide biosynthetic process; biological_process GO:0016773; phosphotransferase activity, alcohol group as acceptor; molecular_function GO:0006468; protein phosphorylation; biological_process GO:0005524; ATP binding; molecular_function GO:0016020; membrane; cellular_component}	{NA}
A00363	{CONTIG10:189881:191668:+}	{gi|568447700|ref|XP_006458364.1|; hypothetical protein [Agaricus bisporus var. bisporus H97, AGABI2DRAFT_176739]}	{NA}	{abv:AGABI2DRAFT176739; }	{NA}	{GO:0015074; DNA integration; biological_process}	{NA}
A00364	{CONTIG10:191692:193437:+}	{gi|568450140|ref|XP_006459171.1|; hypothetical protein [Agaricus bisporus var. bisporus H97, AGABI2DRAFT_116132]}	{NA}	{abv:AGABI2DRAFT116132; }	{NA}	{NA}	{NA}
A00365	{CONTIG10:194859:196523:-}	{gi|598002863|ref|XP_007335052.1|; hypothetical protein AGABI1DRAFT_48233, partial [Agaricus bisporus var. burnettii JB137-S8]}	{NA}	{mpr:MPER_12841; }	{NA}	{NA}	{NA}
A00366	{CONTIG10:196627:198276:+}	{gi|568450140|ref|XP_006459171.1|; hypothetical protein [Agaricus bisporus var. bisporus H97, AGABI2DRAFT_116132]}	{NA}	{abv:AGABI2DRAFT116132; }	{NA}	{NA}	{NA}
A00367	{CONTIG10:200642:203134:-}	{gi|568450140|ref|XP_006459171.1|; hypothetical protein [Agaricus bisporus var. bisporus H97, AGABI2DRAFT_116132]}	{NA}	{abv:AGABI2DRAFT116132; }	{NA}	{NA}	{NA}
A00368	{CONTIG10:203335:205089:+}	{gi|568450140|ref|XP_006459171.1|; hypothetical protein [Agaricus bisporus var. bisporus H97, AGABI2DRAFT_116132]}	{NA}	{abv:AGABI2DRAFT116132; }	{NA}	{NA}	{NA}
A00369	{CONTIG10:206611:207054:+}	{gi|336376649|gb|EGO04984.1|; hypothetical protein [Serpula lacrymans var. lacrymans S7.3, SERLA73DRAFT_82563]}	{NA}	{hir:HETIRDRAFT_45769; }	{NA}	{GO:0003964; RNA-directed DNA polymerase activity; molecular_function GO:0003723; RNA binding; molecular_function GO:0006278; RNA-dependent DNA replication; biological_process}	{NA}
A00370	{CONTIG10:208465:210195:-}	{NA}	{NA}	{NA}	{NA}	{NA}	{NA}
A00371	{CONTIG10:210305:211069:-}	{gi|598002965|ref|XP_007335070.1|; hypothetical protein [Agaricus bisporus var. burnettii JB137-S8, AGABI1DRAFT_48258]}	{P25600; YCH4_YEAST Putative transposon Ty5-1 protein YCL074W OS=Saccharomyces cerevisiae (strain ATCC 204508 / S288c) GN=TY5A PE=5 SV=2}	{abv:AGABI2DRAFT58688; }	{NA}	{NA}	{NA}
A00372	{CONTIG10:211284:213028:+}	{gi|568450140|ref|XP_006459171.1|; hypothetical protein [Agaricus bisporus var. bisporus H97, AGABI2DRAFT_116132]}	{NA}	{abv:AGABI2DRAFT116132; }	{NA}	{NA}	{NA}
A00373	{CONTIG10:30765:32367:+}	{gi|568444769|ref|XP_006457389.1|; hypothetical protein [Agaricus bisporus var. bisporus H97, AGABI2DRAFT_212760]}	{NA}	{NA}	{NA}	{NA}	{NA}
A00374	{CONTIG10:213492:216790:-}	{gi|568447700|ref|XP_006458364.1|; hypothetical protein [Agaricus bisporus var. bisporus H97, AGABI2DRAFT_176739]}	{NA}	{abv:AGABI2DRAFT176739; }	{NA}	{GO:0015074; DNA integration; biological_process}	{NA}
A00375	{CONTIG10:216881:218620:+}	{gi|568450140|ref|XP_006459171.1|; hypothetical protein [Agaricus bisporus var. bisporus H97, AGABI2DRAFT_116132]}	{NA}	{abv:AGABI2DRAFT116132; }	{NA}	{NA}	{NA}
A00376	{CONTIG10:219643:220942:+}	{gi|598007137|ref|XP_007336119.1|; hypothetical protein AGABI1DRAFT_135259, partial [Agaricus bisporus var. burnettii JB137-S8]}	{NA}	{abp:AGABI1DRAFT130361; }	{NA}	{NA}	{NA}
A00377	{CONTIG10:221498:222813:-}	{gi|568440026|ref|XP_006455811.1|; hypothetical protein [Agaricus bisporus var. bisporus H97, AGABI2DRAFT_121727]}	{NA}	{abv:AGABI2DRAFT121727; }	{NA}	{NA}	{NA}
A00378	{CONTIG10:222967:226068:+}	{gi|598002863|ref|XP_007335052.1|; hypothetical protein AGABI1DRAFT_48233, partial [Agaricus bisporus var. burnettii JB137-S8]}	{NA}	{mpr:MPER_12841; }	{NA}	{GO:0015074; DNA integration; biological_process}	{NA}
A00379	{CONTIG10:226287:228210:+}	{gi|568450140|ref|XP_006459171.1|; hypothetical protein [Agaricus bisporus var. bisporus H97, AGABI2DRAFT_116132]}	{NA}	{abv:AGABI2DRAFT116132; }	{NA}	{NA}	{NA}
A00380	{CONTIG10:228268:229941:-}	{gi|568440026|ref|XP_006455811.1|; hypothetical protein [Agaricus bisporus var. bisporus H97, AGABI2DRAFT_121727]}	{NA}	{abv:AGABI2DRAFT121727; }	{NA}	{NA}	{NA}
A00381	{CONTIG10:233944:234608:+}	{gi|598001823|ref|XP_007334813.1|; hypothetical protein [Agaricus bisporus var. burnettii JB137-S8, AGABI1DRAFT_47764]}	{NA}	{abp:AGABI1DRAFT47764; }	{NA}	{NA}	{NA}
A00382	{CONTIG10:235831:236523:-}	{NA}	{NA}	{NA}	{NA}	{GO:0006886; intracellular protein transport; biological_process GO:0016192; vesicle-mediated transport; biological_process GO:0005515; protein binding; molecular_function GO:0030126; COPI vesicle coat; cellular_component GO:0005198; NA}	{NA}
A00383	{CONTIG10:237186:238301:+}	{gi|598007137|ref|XP_007336119.1|; hypothetical protein AGABI1DRAFT_135259, partial [Agaricus bisporus var. burnettii JB137-S8]}	{NA}	{abp:AGABI1DRAFT130361; }	{NA}	{NA}	{NA}
A00384	{CONTIG10:35663:37505:-}	{gi|568448791|ref|XP_006458724.1|; hypothetical protein [Agaricus bisporus var. bisporus H97, AGABI2DRAFT_190931]}	{NA}	{abv:AGABI2DRAFT190931; }	{NA}	{NA}	{NA}
A00385	{CONTIG10:238865:240130:-}	{gi|568450140|ref|XP_006459171.1|; hypothetical protein [Agaricus bisporus var. bisporus H97, AGABI2DRAFT_116132]}	{NA}	{abv:AGABI2DRAFT116132; }	{NA}	{NA}	{NA}
A00386	{CONTIG10:240755:244576:+}	{gi|598002863|ref|XP_007335052.1|; hypothetical protein AGABI1DRAFT_48233, partial [Agaricus bisporus var. burnettii JB137-S8]}	{NA}	{abv:AGABI2DRAFT176739; }	{NA}	{GO:0015074; DNA integration; biological_process}	{NA}
A00387	{CONTIG10:245612:247156:+}	{gi|568447700|ref|XP_006458364.1|; hypothetical protein [Agaricus bisporus var. bisporus H97, AGABI2DRAFT_176739]}	{NA}	{abv:AGABI2DRAFT176739; }	{NA}	{NA}	{NA}
A00388	{CONTIG10:248339:250855:+}	{gi|598002863|ref|XP_007335052.1|; hypothetical protein AGABI1DRAFT_48233, partial [Agaricus bisporus var. burnettii JB137-S8]}	{NA}	{mpr:MPER_12841; }	{NA}	{NA}	{NA}
A00389	{CONTIG10:251275:251811:+}	{gi|568438815|ref|XP_006455409.1|; hypothetical protein [Agaricus bisporus var. bisporus H97, AGABI2DRAFT_75791]}	{NA}	{abv:AGABI2DRAFT75791; }	{NA}	{GO:0016151; nickel ion binding; molecular_function GO:0006464; protein modification process; biological_process}	{NA}
A00390	{CONTIG10:252299:258528:+}	{gi|353235894|emb|CCA67899.1|; hypothetical protein [Piriformospora indica DSM 11827, PIIN_01770]}	{NA}	{NA}	{NA}	{GO:0015074; DNA integration; biological_process}	{NA}
A00391	{CONTIG10:259729:261120:-}	{gi|568464428|ref|XP_006463905.1|; hypothetical protein [Agaricus bisporus var. bisporus H97, AGABI2DRAFT_75191]}	{NA}	{abv:AGABI2DRAFT75191; }	{NA}	{NA}	{NA}
A00392	{CONTIG10:262625:265222:-}	{gi|598002863|ref|XP_007335052.1|; hypothetical protein AGABI1DRAFT_48233, partial [Agaricus bisporus var. burnettii JB137-S8]}	{NA}	{mpr:MPER_12841; }	{NA}	{GO:0015074; DNA integration; biological_process}	{NA}
A00393	{CONTIG10:267207:271532:+}	{gi|598002863|ref|XP_007335052.1|; hypothetical protein AGABI1DRAFT_48233, partial [Agaricus bisporus var. burnettii JB137-S8]}	{NA}	{mpr:MPER_12841; }	{NA}	{GO:0015074; DNA integration; biological_process}	{NA}
A00394	{CONTIG10:272657:273076:-}	{gi|568440859|ref|XP_006456088.1|; hypothetical protein [Agaricus bisporus var. bisporus H97, AGABI2DRAFT_77415]}	{NA}	{abv:AGABI2DRAFT77415; }	{NA}	{NA}	{NA}
A00395	{CONTIG10:44041:46147:+}	{gi|598000723|ref|XP_007334543.1|; hypothetical protein [Agaricus bisporus var. burnettii JB137-S8, AGABI1DRAFT_132841]}	{NA}	{abp:AGABI1DRAFT132841; }	{NA}	{GO:0005515; protein binding; molecular_function}	{NA}
A00396	{CONTIG10:274848:275597:-}	{gi|568450140|ref|XP_006459171.1|; hypothetical protein [Agaricus bisporus var. bisporus H97, AGABI2DRAFT_116132]}	{NA}	{abv:AGABI2DRAFT116132; }	{NA}	{NA}	{NA}
A00397	{CONTIG10:275882:276238:-}	{NA}	{NA}	{NA}	{NA}	{NA}	{NA}
A00398	{CONTIG10:277608:278111:-}	{gi|598007137|ref|XP_007336119.1|; hypothetical protein AGABI1DRAFT_135259, partial [Agaricus bisporus var. burnettii JB137-S8]}	{NA}	{abv:AGABI2DRAFT116129; }	{NA}	{NA}	{NA}
A00399	{CONTIG10:280093:281256:+}	{gi|598005885|ref|XP_007335733.1|; hypothetical protein AGABI1DRAFT_134379, partial [Agaricus bisporus var. burnettii JB137-S8]}	{NA}	{abv:AGABI2DRAFT120694; }	{NA}	{NA}	{NA}
A00400	{CONTIG10:282606:283397:+}	{gi|598002965|ref|XP_007335070.1|; hypothetical protein [Agaricus bisporus var. burnettii JB137-S8, AGABI1DRAFT_48258]}	{P25600; YCH4_YEAST Putative transposon Ty5-1 protein YCL074W OS=Saccharomyces cerevisiae (strain ATCC 204508 / S288c) GN=TY5A PE=5 SV=2}	{abv:AGABI2DRAFT58688; }	{NA}	{NA}	{NA}
A00401	{CONTIG10:285865:286476:-}	{gi|598002965|ref|XP_007335070.1|; hypothetical protein [Agaricus bisporus var. burnettii JB137-S8, AGABI1DRAFT_48258]}	{NA}	{abv:AGABI2DRAFT58688; }	{NA}	{NA}	{NA}
A00402	{CONTIG10:288879:289217:-}	{NA}	{NA}	{NA}	{NA}	{NA}	{NA}
A00403	{CONTIG10:291503:291829:+}	{gi|598007137|ref|XP_007336119.1|; hypothetical protein AGABI1DRAFT_135259, partial [Agaricus bisporus var. burnettii JB137-S8]}	{NA}	{abv:AGABI2DRAFT44527; }	{NA}	{NA}	{NA}
A00404	{CONTIG10:293196:293771:+}	{gi|598002669|ref|XP_007335013.1|; hypothetical protein [Agaricus bisporus var. burnettii JB137-S8, AGABI1DRAFT_48154]}	{NA}	{abv:AGABI2DRAFT44527; }	{NA}	{NA}	{NA}
A00405	{CONTIG10:293857:294611:+}	{NA}	{NA}	{NA}	{NA}	{NA}	{NA}
A00406	{CONTIG10:46870:48937:+}	{gi|82941276|dbj|BAE48754.1|; polyphenoloxidase [Agaricus blazei]}	{Q00024; PPO1_AGABI Polyphenol oxidase 1 OS=Agaricus bisporus GN=PPO1 PE=2 SV=1}	{abp:AGABI1DRAFT116717; K00505 TYR tyrosinase 1.14.18.1 Metabolism; Amino acid metabolism; Tyrosine metabolism [PATH:ko00350] Metabolism; Biosynthesis of other secondary metabolites; Isoquinoline alkaloid biosynthesis [PATH:ko00950] Metabolism; Biosynthesis of other secondary metabolites; Betalain biosynthesis [PATH:ko00965] Organismal Systems; Endocrine system; Melanogenesis [PATH:ko04916] }	{NA}	{GO:0009317; acetyl-CoA carboxylase complex; cellular_component GO:0008152; NA GO:0006633; fatty acid biosynthetic process; biological_process GO:0016491; oxidoreductase activity; molecular_function GO:0003989; acetyl-CoA carboxylase activity; molecular_function}	{NA}
A00407	{CONTIG10:297841:298629:+}	{NA}	{NA}	{NA}	{NA}	{NA}	{NA}
A00408	{CONTIG10:300321:301076:-}	{NA}	{NA}	{NA}	{NA}	{NA}	{NA}
A00409	{CONTIG10:302772:306301:+}	{gi|568450140|ref|XP_006459171.1|; hypothetical protein [Agaricus bisporus var. bisporus H97, AGABI2DRAFT_116132]}	{NA}	{abv:AGABI2DRAFT116132; }	{NA}	{GO:0016151; nickel ion binding; molecular_function GO:0006464; protein modification process; biological_process GO:0015074; DNA integration; biological_process}	{NA}
A00410	{CONTIG10:307719:308189:-}	{gi|389595499|gb|AFK88551.1|; reverse transcriptase, partial [Arabidopsis halleri subsp. gemmifera]}	{NA}	{ccaj:109796376; }	{NA}	{NA}	{NA}
A00411	{CONTIG10:312741:313356:-}	{NA}	{NA}	{NA}	{NA}	{GO:0003676; nucleic acid binding; molecular_function GO:0008270; zinc ion binding; molecular_function}	{NA}
A00412	{CONTIG10:315277:316445:+}	{NA}	{NA}	{NA}	{NA}	{GO:0016021; integral to membrane; cellular_component GO:0008270; zinc ion binding; molecular_function GO:0035434; copper ion transmembrane transport; biological_process GO:0005375; copper ion transmembrane transporter activity; molecular_function GO:0003676; nucleic acid binding; molecular_function}	{NA}
A00413	{CONTIG10:323131:324932:-}	{gi|568442086|ref|XP_006456497.1|; hypothetical protein [Agaricus bisporus var. bisporus H97, AGABI2DRAFT_78318]}	{P0CT93; ORDA_ASPFL O-methylsterigmatocystin oxidoreductase OS=Aspergillus flavus GN=ordA PE=3 SV=1}	{abv:AGABI2DRAFT78318; }	{NA}	{GO:0020037; heme binding; molecular_function GO:0055114; oxidation-reduction process; biological_process GO:0005506; iron ion binding; molecular_function GO:0016705; oxidoreductase activity, acting on paired donors, with incorporation or reduction of molecular oxygen; molecular_function}	{NA}
A00414	{CONTIG10:325794:326403:-}	{gi|648166542|gb|KDR80215.1|; hypothetical protein [Galerina marginata CBS 339.88, GALMADRAFT_62250]}	{P78567; H2B_AGABI Histone H2B OS=Agaricus bisporus GN=htbA PE=2 SV=3}	{abp:AGABI1DRAFT86696; K11252 H2B histone H2B -- Human Diseases; Substance dependence; Alcoholism [PATH:ko05034] Human Diseases; Cancers; Viral carcinogenesis [PATH:ko05203] Human Diseases; Immune diseases; Systemic lupus erythematosus [PATH:ko05322] }	{YBL002w; KOG1744 Histone H2B B Chromatin structure and dynamics ;}	{GO:0007067; mitosis; biological_process GO:0006352; transcription initiation, DNA-dependent; biological_process GO:0051382; kinetochore assembly; biological_process GO:0003677; DNA binding; molecular_function GO:0005622; intracellular; cellular_component GO:0043565; sequence-specific DNA binding; molecular_function GO:0005669; transcription factor TFIID complex; cellular_component}	{NA}
A00415	{CONTIG10:326594:327117:+}	{gi|169851380|ref|XP_001832380.1|; histone H2A [Coprinopsis cinerea okayama7#130]}	{Q9HGX4; H2A_AGABI Histone H2A OS=Agaricus bisporus PE=2 SV=3}	{cci:CC1G_07640; K11251 H2A histone H2A -- Cellular Processes; Cell growth and death; Necroptosis [PATH:ko04217] Human Diseases; Substance dependence; Alcoholism [PATH:ko05034] Human Diseases; Immune diseases; Systemic lupus erythematosus [PATH:ko05322] }	{CE04501A; KOG1756 Histone 2A B Chromatin structure and dynamics ;}	{GO:0043565; sequence-specific DNA binding; molecular_function GO:0003677; DNA binding; molecular_function GO:0005622; intracellular; cellular_component}	{NA}
A00416	{CONTIG10:327155:329624:-}	{gi|170100200|ref|XP_001881318.1|; predicted protein [Laccaria bicolor S238N-H82]}	{NA}	{lbc:LACBIDRAFT_297720; K20177 VPS3, TGFBRAP1 vacuolar protein sorting-associated protein 3 -- Cellular Processes; Transport and catabolism; Autophagy - yeast [PATH:ko04138] }	{NA}	{GO:0005083; small GTPase regulator activity; molecular_function}	{NA}
A00417	{CONTIG11:6905:9185:+}	{gi|558697895|gb|AHA85313.1|; pyranose dehydrogenase [Agaricus campestris]}	{V5NDL4; PDH1_AGACM Pyranose dehydrogenase OS=Agaricus campestris GN=pdh1 PE=1 SV=1}	{abp:AGABI1DRAFT123150; K20154 PDH pyranose dehydrogenase 1.1.99.29 }	{NA}	{GO:0016491; oxidoreductase activity; molecular_function GO:0016117; carotenoid biosynthetic process; biological_process GO:0006813; potassium ion transport; biological_process GO:0050660; flavin adenine dinucleotide binding; molecular_function GO:0016705; oxidoreductase activity, acting on paired donors, with incorporation or reduction of molecular oxygen; molecular_function GO:0055114; oxidatio…	{AHA85313.1_AA3; {pyranose dehydrogenase (PDH;AcPDH);1.1.99.29;;Agaricus campestris;V5NDL4} cellobiose dehydrogenase (EC 1.1.99.18); glucose 1-oxidase (EC 1.1.3.4); aryl alcohol oxidase (EC 1.1.3.7); alcohol oxidase (EC 1.1.3.13); pyranose oxidase (EC 1.1.3.10) AA3 enzymes belong to the glucose-methanol-choline (GMC) oxidoreductases family. AA3 enzymes are flavoproteins containing a flavin-adenin…
A00418	{CONTIG11:9747:10616:-}	{gi|568449192|ref|XP_006458854.1|; hypothetical protein [Agaricus bisporus]}	{P38264; PHO88_YEAST SRP-independent targeting protein 3 OS=Saccharomyces cerevisiae (strain ATCC 204508 / S288c) GN=PHO88 PE=1 SV=1}	{abp:AGABI1DRAFT86121; }	{YBR106w; KOG4554 Protein involved in inorganic phosphate transport P Inorganic ion transport and metabolism ;}	{NA}	{NA}
A00419	{CONTIG11:10773:12777:+}	{gi|568449195|ref|XP_006458855.1|; hypothetical protein [Agaricus bisporus var. bisporus H97, AGABI2DRAFT_217672]}	{NA}	{abv:AGABI2DRAFT217672; }	{NA}	{NA}	{NA}
A00420	{CONTIG11:17034:18439:+}	{gi|568449198|ref|XP_006458856.1|; hypothetical protein [Agaricus bisporus var. bisporus H97, AGABI2DRAFT_190999]}	{NA}	{abv:AGABI2DRAFT190999; }	{NA}	{GO:0005634; nucleus; cellular_component GO:0045893; positive regulation of transcription, DNA-dependent; biological_process}	{NA}
A00421	{CONTIG11:26915:28185:-}	{gi|597987147|ref|XP_007331276.1|; hypothetical protein [Agaricus bisporus var. burnettii JB137-S8, AGABI1DRAFT_114784]}	{P50276; MUP1_YEAST High-affinity methionine permease OS=Saccharomyces cerevisiae (strain ATCC 204508 / S288c) GN=MUP1 PE=1 SV=1}	{abp:AGABI1DRAFT114784; }	{YGR055w; KOG1287 Amino acid transporters E Amino acid transport and metabolism ;}	{GO:0016020; membrane; cellular_component GO:0015171; amino acid transmembrane transporter activity; molecular_function GO:0006810; transport; biological_process GO:0055085; transmembrane transport; biological_process GO:0003333; amino acid transmembrane transport; biological_process}	{NA}
A00422	{CONTIG11:36436:37812:+}	{gi|568449216|ref|XP_006458862.1|; hypothetical protein [Agaricus bisporus var. bisporus H97, AGABI2DRAFT_191005]}	{NA}	{abv:AGABI2DRAFT191005; }	{NA}	{NA}	{NA}
A00423	{CONTIG11:39468:40209:+}	{gi|597987175|ref|XP_007331283.1|; hypothetical protein [Agaricus bisporus var. burnettii JB137-S8, AGABI1DRAFT_107702]}	{NA}	{abp:AGABI1DRAFT107702; }	{NA}	{NA}	{NA}
A00424	{CONTIG11:43562:44207:+}	{gi|568449222|ref|XP_006458864.1|; hypothetical protein [Agaricus bisporus var. bisporus H97, AGABI2DRAFT_134468]}	{NA}	{abv:AGABI2DRAFT134468; }	{NA}	{NA}	{NA}
A00425	{CONTIG11:46339:48074:-}	{gi|597987179|ref|XP_007331284.1|; hypothetical protein [Agaricus bisporus var. burnettii JB137-S8, AGABI1DRAFT_114790]}	{NA}	{abp:AGABI1DRAFT114790; K00823 puuE 4-aminobutyrate aminotransferase 2.6.1.19 Metabolism; Amino acid metabolism; Alanine, aspartate and glutamate metabolism [PATH:ko00250] Metabolism; Metabolism of other amino acids; beta-Alanine metabolism [PATH:ko00410] Metabolism; Carbohydrate metabolism; Propanoate metabolism [PATH:ko00640] Metabolism; Carbohydrate metabolism; Butanoate metabolism [PATH:ko006…	{NA}	{GO:0008483; transaminase activity; molecular_function GO:0009058; biosynthetic process; biological_process GO:0030170; pyridoxal phosphate binding; molecular_function}	{NA}
A00426	{CONTIG11:49009:51516:-}	{gi|597987183|ref|XP_007331285.1|; hypothetical protein [Agaricus bisporus var. burnettii JB137-S8, AGABI1DRAFT_114791]}	{NA}	{abp:AGABI1DRAFT114791; }	{NA}	{NA}	{NA}
A00427	{CONTIG11:55876:56793:-}	{NA}	{NA}	{NA}	{NA}	{NA}	{NA}
A00428	{CONTIG11:58152:60338:+}	{gi|597987201|ref|XP_007331289.1|; hypothetical protein [Agaricus bisporus var. burnettii JB137-S8, AGABI1DRAFT_129687]}	{NA}	{abp:AGABI1DRAFT129687; }	{NA}	{GO:0016021; integral to membrane; cellular_component GO:0055085; transmembrane transport; biological_process}	{NA}
A00429	{CONTIG11:70527:70885:+}	{gi|568449344|ref|XP_006458905.1|; dsRNA-binding protein [Agaricus bisporus var. bisporus H97]}	{NA}	{abv:AGABI2DRAFT115872; }	{NA}	{NA}	{NA}
A00430	{CONTIG11:74584:75096:+}	{NA}	{NA}	{NA}	{NA}	{NA}	{NA}
A00431	{CONTIG11:75666:76726:+}	{gi|630191752|ref|XP_007848778.1|; ribonuclease p complex subunit [Moniliophthora roreri MCA 2997]}	{NA}	{mrr:Moror_10439; K03538 POP4, RPP29 ribonuclease P protein subunit POP4 3.1.26.5 Genetic Information Processing; Translation; Ribosome biogenesis in eukaryotes [PATH:ko03008] Genetic Information Processing; Translation; RNA transport [PATH:ko03013] }	{NA}	{GO:0006379; mRNA cleavage; biological_process GO:0006364; rRNA processing; biological_process GO:0000172; ribonuclease MRP complex; cellular_component GO:0004540; ribonuclease activity; molecular_function GO:0003723; RNA binding; molecular_function GO:0008033; tRNA processing; biological_process GO:0030677; ribonuclease P complex; cellular_component}	{NA}
A00432	{CONTIG11:81131:82106:+}	{gi|568449314|ref|XP_006458895.1|; hypothetical protein [Agaricus bisporus var. bisporus H97, AGABI2DRAFT_65743]}	{NA}	{abv:AGABI2DRAFT65743; K00365 uaZ urate oxidase 1.7.3.3 Metabolism; Nucleotide metabolism; Purine metabolism [PATH:ko00230] Metabolism; Biosynthesis of other secondary metabolites; Caffeine metabolism [PATH:ko00232] }	{NA}	{NA}	{NA}
A00433	{CONTIG11:83887:86263:+}	{gi|156122770|gb|ABU50336.1|; putative zinc finger/binuclear cluster transcriptional regulator [Armillaria mellea]}	{NA}	{NA}	{NA}	{GO:0046872; metal ion binding; molecular_function GO:0005634; nucleus; cellular_component GO:0000981; sequence-specific DNA binding RNA polymerase II transcription factor activity; molecular_function GO:0006355; regulation of transcription, DNA-dependent; biological_process GO:0008270; zinc ion binding; molecular_function}	{NA}
A00434	{CONTIG11:91096:93166:+}	{gi|568449302|ref|XP_006458891.1|; hypothetical protein [Agaricus bisporus var. bisporus H97, AGABI2DRAFT_177042]}	{NA}	{abv:AGABI2DRAFT177042; }	{NA}	{NA}	{AEM76790.1_GH79; {Orf9;--;Armillaria mellea;--} &beta;-glucuronidase (EC 3.2.1.31); hyaluronoglucuronidase (EC 3.2.1.36); heparanase (EC 3.2.1.166); baicalin &beta;-glucuronidase (EC 3.2.1.167); &beta;-4-O-methyl-glucuronidase (EC 3.2.1.-) NA}
A00435	{CONTIG11:93934:96564:+}	{gi|406694257|gb|EKC97588.1|; hypothetical protein [Trichosporon asahii var. asahii CBS 8904, A1Q2_08126]}	{Q50228; FMDA_METME Formamidase OS=Methylophilus methylotrophus GN=fmdA PE=1 SV=1}	{abp:AGABI1DRAFT76237; K01455 E3.5.1.49 formamidase 3.5.1.49 Metabolism; Metabolism of other amino acids; Cyanoamino acid metabolism [PATH:ko00460] Metabolism; Carbohydrate metabolism; Glyoxylate and dicarboxylate metabolism [PATH:ko00630] Metabolism; Energy metabolism; Nitrogen metabolism [PATH:ko00910] }	{NA}	{GO:0016811; hydrolase activity, acting on carbon-nitrogen (but not peptide) bonds, in linear amides; molecular_function GO:0008152; NA}	{NA}
A00436	{CONTIG11:98998:99741:+}	{gi|597987225|ref|XP_007331295.1|; hypothetical protein [Agaricus bisporus var. burnettii JB137-S8, AGABI1DRAFT_92853]}	{NA}	{abp:AGABI1DRAFT92853; }	{NA}	{NA}	{NA}
A00437	{CONTIG11:102880:103606:+}	{gi|597987225|ref|XP_007331295.1|; hypothetical protein [Agaricus bisporus var. burnettii JB137-S8, AGABI1DRAFT_92853]}	{NA}	{abp:AGABI1DRAFT92853; }	{NA}	{NA}	{NA}
A00438	{CONTIG11:105062:106697:+}	{gi|568449359|ref|XP_006458910.1|; hypothetical protein [Agaricus bisporus var. bisporus H97, AGABI2DRAFT_183758]}	{NA}	{abv:AGABI2DRAFT183758; }	{NA}	{GO:0005515; protein binding; molecular_function}	{NA}
A00439	{CONTIG11:107221:107493:+}	{NA}	{NA}	{NA}	{NA}	{NA}	{NA}
A00440	{CONTIG11:109596:111375:+}	{gi|568449362|ref|XP_006458911.1|; hypothetical protein [Agaricus bisporus var. bisporus H97, AGABI2DRAFT_191032]}	{NA}	{abv:AGABI2DRAFT191032; }	{NA}	{NA}	{CCA67406.1_CBM13; {PIIN_01237;--;Piriformospora indica (Pirin1);--} Modules of approx. 150 residues which always appear as a threefold internal repeat. The only apparent exception to this, xylanase II of Actinomadura sp. FC7 (GenBank U08894), is in fact not completely sequenced. These modules were first identified in several plant lectins such as ricin or agglutinin of Ricinus communis which bin…
A00441	{CONTIG11:111930:112658:-}	{gi|597987019|ref|XP_007331245.1|; hypothetical protein [Agaricus bisporus var. burnettii JB137-S8, AGABI1DRAFT_76254]}	{NA}	{abp:AGABI1DRAFT76254; }	{NA}	{GO:0004721; phosphoprotein phosphatase activity; molecular_function GO:0004725; protein tyrosine phosphatase activity; molecular_function GO:0008138; protein tyrosine/serine/threonine phosphatase activity; molecular_function GO:0006470; protein dephosphorylation; biological_process}	{NA}
A00442	{CONTIG11:117708:119848:-}	{gi|597991003|ref|XP_007332211.1|; hypothetical protein [Agaricus bisporus var. burnettii JB137-S8, AGABI1DRAFT_93600]}	{NA}	{abp:AGABI1DRAFT93600; }	{NA}	{NA}	{NA}
A00443	{CONTIG11:124449:126081:-}	{NA}	{NA}	{NA}	{NA}	{NA}	{NA}
A00444	{CONTIG11:126142:127763:-}	{gi|597987309|ref|XP_007331316.1|; hypothetical protein AGABI1DRAFT_121620, partial [Agaricus bisporus var. burnettii JB137-S8]}	{NA}	{abp:AGABI1DRAFT121620; }	{NA}	{NA}	{NA}
A00445	{CONTIG11:130318:131684:+}	{gi|597988617|ref|XP_007331637.1|; hypothetical protein [Agaricus bisporus var. burnettii JB137-S8, AGABI1DRAFT_115049]}	{B9W4V6; APO1_AGRAE Aromatic peroxygenase OS=Agrocybe aegerita GN=APO1 PE=1 SV=1}	{abp:AGABI1DRAFT115049; K21820 APO1 unspecific peroxygenase 1.11.2.1 }	{NA}	{GO:0004601; peroxidase activity; molecular_function}	{NA}
A00446	{CONTIG11:136014:137207:-}	{gi|568449392|ref|XP_006458921.1|; hypothetical protein [Agaricus bisporus var. bisporus H97, AGABI2DRAFT_115888]}	{NA}	{abv:AGABI2DRAFT115888; }	{NA}	{GO:0008270; zinc ion binding; molecular_function GO:0005515; protein binding; molecular_function GO:0046872; metal ion binding; molecular_function}	{NA}
A00447	{CONTIG11:137704:138901:-}	{gi|597976365|ref|XP_007328646.1|; hypothetical protein [Agaricus bisporus var. burnettii JB137-S8, AGABI1DRAFT_112859]}	{Q9DCN1; NUD12_MOUSE Peroxisomal NADH pyrophosphatase NUDT12 OS=Mus musculus GN=Nudt12 PE=1 SV=1}	{abp:AGABI1DRAFT112859; K03426 E3.6.1.22, NUDT12, nudC NAD+ diphosphatase 3.6.1.22 Metabolism; Metabolism of cofactors and vitamins; Nicotinate and nicotinamide metabolism [PATH:ko00760] Cellular Processes; Transport and catabolism; Peroxisome [PATH:ko04146] }	{Hs13899267_2; KOG3084 NADH pyrophosphatase I of the Nudix family of hydrolases L Replication, recombination and repair ;}	{GO:0046872; metal ion binding; molecular_function GO:0016787; hydrolase activity; molecular_function}	{NA}
A00448	{CONTIG11:140377:142666:+}	{gi|597987691|ref|XP_007331412.1|; hypothetical protein [Agaricus bisporus var. burnettii JB137-S8, AGABI1DRAFT_129845]}	{NA}	{abp:AGABI1DRAFT129845; }	{NA}	{GO:0003724; RNA helicase activity; molecular_function GO:0003723; RNA binding; molecular_function GO:0005524; ATP binding; molecular_function}	{NA}
A00449	{CONTIG11:153183:156387:+}	{gi|568449395|ref|XP_006458922.1|; hypothetical protein [Agaricus bisporus var. bisporus H97, AGABI2DRAFT_115889]}	{NA}	{abv:AGABI2DRAFT115889; K14430 PHO87_91 phosphate transporter -- }	{NA}	{GO:0055085; transmembrane transport; biological_process GO:0005215; NA GO:0016020; membrane; cellular_component GO:0006814; sodium ion transport; biological_process GO:0016021; integral to membrane; cellular_component GO:0001882; nucleoside binding; molecular_function}	{NA}
A00450	{CONTIG11:164936:166229:-}	{gi|568449402|ref|XP_006458924.1|; hypothetical protein [Agaricus bisporus var. bisporus H97, AGABI2DRAFT_200781]}	{Q28717; PTPA_RABIT Serine/threonine-protein phosphatase 2A activator OS=Oryctolagus cuniculus GN=PPP2R4 PE=1 SV=1}	{abv:AGABI2DRAFT200781; K17605 PPP2R4, PTPA serine/threonine-protein phosphatase 2A activator -- Human Diseases; Endocrine and metabolic diseases; Insulin resistance [PATH:ko04931] }	{Hs10880987; KOG2867 Phosphotyrosyl phosphatase activator DT Cell cycle control, cell division, chromosome partitioning ; Signal transduction mechanisms ;}	{GO:0019211; phosphatase activator activity; molecular_function}	{NA}
A00451	{CONTIG11:166453:169343:+}	{gi|597987341|ref|XP_007331324.1|; hypothetical protein [Agaricus bisporus var. burnettii JB137-S8, AGABI1DRAFT_121627]}	{NA}	{abp:AGABI1DRAFT121627; K10884 XRCC6, KU70, G22P1 ATP-dependent DNA helicase 2 subunit 1 -- Genetic Information Processing; Replication and repair; Non-homologous end-joining [PATH:ko03450] }	{NA}	{GO:0004003; ATP-dependent DNA helicase activity; molecular_function GO:0003677; DNA binding; molecular_function GO:0003676; nucleic acid binding; molecular_function GO:0006303; double-strand break repair via nonhomologous end joining; biological_process}	{NA}
A00452	{CONTIG11:172157:173035:+}	{gi|568449411|ref|XP_006458927.1|; hypothetical protein [Agaricus bisporus]}	{O74790; GLRX4_SCHPO Monothiol glutaredoxin-4 OS=Schizosaccharomyces pombe (strain 972 / ATCC 24843) GN=grx4 PE=1 SV=1}	{abp:AGABI1DRAFT114817; }	{SPBC26H8.06; KOG0911 Glutaredoxin-related protein O Posttranslational modification, protein turnover, chaperones ;}	{GO:0015035; protein disulfide oxidoreductase activity; molecular_function GO:0009055; NA GO:0005515; protein binding; molecular_function GO:0045454; cell redox homeostasis; biological_process}	{NA}
A00453	{CONTIG11:173275:173908:+}	{gi|568449413|ref|XP_006458928.1|; hypothetical protein [Agaricus bisporus var. bisporus H97, AGABI2DRAFT_217751]}	{NA}	{abv:AGABI2DRAFT217751; }	{NA}	{NA}	{NA}
A00454	{CONTIG11:180690:182463:-}	{NA}	{NA}	{NA}	{NA}	{NA}	{NA}
A00455	{CONTIG11:182558:184989:-}	{gi|599109554|ref|XP_007383928.1|; hypothetical protein PUNSTDRAFT_29795, partial [Punctularia strigosozonata HHB-11173 SS5]}	{NA}	{psq:PUNSTDRAFT_29795; }	{NA}	{GO:0015074; DNA integration; biological_process GO:0003677; DNA binding; molecular_function GO:0006310; DNA recombination; biological_process}	{NA}
A00456	{CONTIG11:185092:187107:-}	{gi|576989263|gb|EUC61982.1|; reverse transcriptase/ribonuclease H, putative [Rhizoctonia solani AG-3 Rhs1AP]}	{NA}	{NA}	{NA}	{GO:0005515; protein binding; molecular_function}	{NA}
A00457	{CONTIG11:188868:190250:+}	{gi|568449419|ref|XP_006458930.1|; hypothetical protein [Agaricus bisporus var. bisporus H97, AGABI2DRAFT_115896]}	{NA}	{abv:AGABI2DRAFT115896; }	{NA}	{NA}	{NA}
A00458	{CONTIG11:193196:194808:+}	{gi|568449427|ref|XP_006458933.1|; hypothetical protein [Agaricus bisporus var. bisporus H97, AGABI2DRAFT_183773]}	{NA}	{abv:AGABI2DRAFT183773; K07119 K07119 uncharacterized protein -- }	{NA}	{GO:0006813; potassium ion transport; biological_process GO:0008270; zinc ion binding; molecular_function GO:0016491; oxidoreductase activity; molecular_function GO:0055114; oxidation-reduction process; biological_process}	{NA}
A00459	{CONTIG11:196723:198324:+}	{gi|568449427|ref|XP_006458933.1|; hypothetical protein [Agaricus bisporus var. bisporus H97, AGABI2DRAFT_183773]}	{NA}	{abv:AGABI2DRAFT183773; K07119 K07119 uncharacterized protein -- }	{NA}	{GO:0055114; oxidation-reduction process; biological_process GO:0003677; DNA binding; molecular_function GO:0016491; oxidoreductase activity; molecular_function GO:0008270; zinc ion binding; molecular_function GO:0006813; potassium ion transport; biological_process}	{NA}
A00460	{CONTIG11:201323:201921:-}	{NA}	{NA}	{NA}	{NA}	{NA}	{NA}
A00461	{CONTIG11:203440:204095:+}	{gi|568449442|ref|XP_006458938.1|; hypothetical protein [Agaricus bisporus var. bisporus H97, AGABI2DRAFT_191046]}	{NA}	{abv:AGABI2DRAFT191046; }	{NA}	{NA}	{NA}
A00462	{CONTIG11:204241:205343:-}	{gi|598003323|ref|XP_007335147.1|; hypothetical protein [Agaricus bisporus var. burnettii JB137-S8, AGABI1DRAFT_109971]}	{NA}	{NA}	{NA}	{NA}	{NA}
A00463	{CONTIG11:205646:207330:+}	{gi|568449427|ref|XP_006458933.1|; hypothetical protein [Agaricus bisporus var. bisporus H97, AGABI2DRAFT_183773]}	{Q29073; PTGR1_PIG Prostaglandin reductase 1 OS=Sus scrofa GN=PTGR1 PE=1 SV=1}	{abv:AGABI2DRAFT183773; K07119 K07119 uncharacterized protein -- }	{Hs22045008; KOG1196 Predicted NAD-dependent oxidoreductase R General function prediction only ;}	{GO:0006813; potassium ion transport; biological_process GO:0008270; zinc ion binding; molecular_function GO:0016491; oxidoreductase activity; molecular_function GO:0055114; oxidation-reduction process; biological_process}	{NA}
A00464	{CONTIG11:207586:209882:+}	{gi|568449430|ref|XP_006458934.1|; hypothetical protein [Agaricus bisporus var. bisporus H97, AGABI2DRAFT_177067]}	{NA}	{abv:AGABI2DRAFT177067; }	{NA}	{NA}	{NA}
A00465	{CONTIG11:212115:214159:-}	{gi|568449448|ref|XP_006458940.1|; hypothetical protein [Agaricus bisporus var. bisporus H97, AGABI2DRAFT_191047]}	{NA}	{abv:AGABI2DRAFT191047; K00480 E1.14.13.1 salicylate hydroxylase 1.14.13.1 Metabolism; Xenobiotics biodegradation and metabolism; Dioxin degradation [PATH:ko00621] Metabolism; Xenobiotics biodegradation and metabolism; Polycyclic aromatic hydrocarbon degradation [PATH:ko00624] Metabolism; Xenobiotics biodegradation and metabolism; Naphthalene degradation [PATH:ko00626] }	{NA}	{GO:0016491; oxidoreductase activity; molecular_function GO:0055114; oxidation-reduction process; biological_process GO:0050660; flavin adenine dinucleotide binding; molecular_function}	{NA}
A00466	{CONTIG11:218121:219799:+}	{gi|568449454|ref|XP_006458942.1|; hypothetical protein [Agaricus bisporus var. bisporus H97, AGABI2DRAFT_200800]}	{NA}	{abv:AGABI2DRAFT200800; }	{NA}	{NA}	{NA}
A00467	{CONTIG11:221953:224115:-}	{gi|568449483|ref|XP_006458952.1|; hypothetical protein AGABI2DRAFT_191054, partial [Agaricus bisporus var. bisporus H97]}	{NA}	{abv:AGABI2DRAFT191054; }	{NA}	{GO:0019013; viral nucleocapsid; cellular_component}	{NA}
A00468	{CONTIG11:224987:227905:-}	{gi|597987407|ref|XP_007331340.1|; hypothetical protein [Agaricus bisporus var. burnettii JB137-S8, AGABI1DRAFT_107742]}	{NA}	{abp:AGABI1DRAFT107742; }	{NA}	{NA}	{NA}
A00469	{CONTIG11:228331:229736:-}	{NA}	{NA}	{NA}	{NA}	{GO:0005615; extracellular space; cellular_component}	{NA}
A00470	{CONTIG11:230771:232236:+}	{gi|568449463|ref|XP_006458945.1|; hypothetical protein [Agaricus bisporus var. bisporus H97, AGABI2DRAFT_200803]}	{NA}	{abv:AGABI2DRAFT200803; }	{NA}	{GO:0016491; oxidoreductase activity; molecular_function GO:0008270; zinc ion binding; molecular_function GO:0008610; lipid biosynthetic process; biological_process GO:0008152; NA GO:0016747; transferase activity, transferring acyl groups other than amino-acyl groups; molecular_function GO:0055114; oxidation-reduction process; biological_process}	{NA}
A00471	{CONTIG11:232609:234947:-}	{gi|568449466|ref|XP_006458946.1|; hypothetical protein [Agaricus bisporus var. bisporus H97, AGABI2DRAFT_115910]}	{NA}	{abv:AGABI2DRAFT115910; }	{NA}	{GO:0008152; NA GO:0016787; hydrolase activity; molecular_function GO:0006508; proteolysis; biological_process GO:0008236; serine-type peptidase activity; molecular_function}	{NA}
A00472	{CONTIG11:236328:237446:-}	{gi|568449466|ref|XP_006458946.1|; hypothetical protein [Agaricus bisporus var. bisporus H97, AGABI2DRAFT_115910]}	{NA}	{abv:AGABI2DRAFT115910; }	{NA}	{NA}	{NA}
A00473	{CONTIG11:241686:245713:-}	{gi|597987419|ref|XP_007331343.1|; hypothetical protein [Agaricus bisporus var. burnettii JB137-S8, AGABI1DRAFT_121635]}	{NA}	{abp:AGABI1DRAFT121635; K20176 SGSM3, MAP small G protein signaling modulator 3 -- }	{NA}	{GO:0032313; regulation of Rab GTPase activity; biological_process GO:0005097; Rab GTPase activator activity; molecular_function}	{NA}
A00474	{CONTIG11:246061:246403:+}	{gi|597986809|ref|XP_007331192.1|; hypothetical protein [Agaricus bisporus var. burnettii JB137-S8, AGABI1DRAFT_42280]}	{Q3E846; COA6_YEAST Cytochrome c oxidase assembly factor 6 OS=Saccharomyces cerevisiae (strain ATCC 204508 / S288c) GN=COA6 PE=1 SV=1}	{abp:AGABI1DRAFT42280; K18179 COA6 cytochrome c oxidase assembly factor 6 -- }	{NA}	{GO:0005739; mitochondrion; cellular_component GO:0004129; cytochrome-c oxidase activity; molecular_function}	{NA}
A00475	{CONTIG11:246700:247623:+}	{gi|628848813|ref|XP_007772702.1|; hypothetical protein [Coniophora puteana RWD-64-598 SS2, CONPUDRAFT_92468]}	{NA}	{cput:CONPUDRAFT_144342; K19619 TDP2 tyrosyl-DNA phosphodiesterase 2 3.1.4.- }	{NA}	{NA}	{NA}
A00476	{CONTIG11:250555:251474:-}	{NA}	{NA}	{NA}	{NA}	{NA}	{NA}
A00477	{CONTIG11:252759:253137:-}	{NA}	{NA}	{NA}	{NA}	{NA}	{NA}
A00478	{CONTIG11:255076:256983:-}	{gi|568449489|ref|XP_006458954.1|; hypothetical protein [Agaricus bisporus var. bisporus H97, AGABI2DRAFT_115917]}	{NA}	{abv:AGABI2DRAFT115917; }	{NA}	{GO:0005524; ATP binding; molecular_function GO:0016887; ATPase activity; molecular_function}	{NA}
A00479	{CONTIG11:258185:258742:+}	{gi|597983213|ref|XP_007330315.1|; hypothetical protein AGABI1DRAFT_22157, partial [Agaricus bisporus var. burnettii JB137-S8]}	{NA}	{abp:AGABI1DRAFT22157; }	{NA}	{GO:0003723; RNA binding; molecular_function GO:0005524; ATP binding; molecular_function GO:0003724; RNA helicase activity; molecular_function}	{NA}
A00480	{CONTIG11:259944:261028:-}	{NA}	{NA}	{NA}	{NA}	{GO:0042981; regulation of apoptosis; biological_process}	{NA}
A00481	{CONTIG11:261792:263575:+}	{gi|597987461|ref|XP_007331353.1|; hypothetical protein [Agaricus bisporus var. burnettii JB137-S8, AGABI1DRAFT_107753]}	{NA}	{abp:AGABI1DRAFT107753; }	{NA}	{GO:0005515; protein binding; molecular_function}	{NA}
A00482	{CONTIG11:263828:266488:-}	{gi|597987457|ref|XP_007331352.1|; hypothetical protein [Agaricus bisporus var. burnettii JB137-S8, AGABI1DRAFT_129759]}	{NA}	{abp:AGABI1DRAFT129759; }	{NA}	{GO:0055085; transmembrane transport; biological_process GO:0022857; transmembrane transporter activity; molecular_function GO:0016021; integral to membrane; cellular_component}	{NA}
A00483	{CONTIG11:269982:272676:-}	{gi|568449504|ref|XP_006458959.1|; hypothetical protein AGABI2DRAFT_183783, partial [Agaricus bisporus var. bisporus H97]}	{NA}	{abv:AGABI2DRAFT183783; K03507 DPB11 DNA replication regulator DPB11 -- }	{NA}	{NA}	{NA}
A00484	{CONTIG11:275044:276356:-}	{gi|597987447|ref|XP_007331350.1|; hypothetical protein [Agaricus bisporus var. burnettii JB137-S8, AGABI1DRAFT_121639]}	{NA}	{abv:AGABI2DRAFT183782; }	{NA}	{NA}	{NA}
A00485	{CONTIG11:279709:281579:-}	{gi|597987439|ref|XP_007331348.1|; hypothetical protein [Agaricus bisporus var. burnettii JB137-S8, AGABI1DRAFT_107749]}	{NA}	{abp:AGABI1DRAFT107749; K09403 FOXJ2_3 forkhead box protein J2/3 -- }	{NA}	{GO:0003700; sequence-specific DNA binding transcription factor activity; molecular_function GO:0043565; sequence-specific DNA binding; molecular_function GO:0006355; regulation of transcription, DNA-dependent; biological_process}	{NA}
A00486	{CONTIG11:285506:286912:+}	{gi|597987435|ref|XP_007331347.1|; hypothetical protein [Agaricus bisporus var. burnettii JB137-S8, AGABI1DRAFT_107748]}	{NA}	{abp:AGABI1DRAFT107748; }	{NA}	{NA}	{NA}
A00487	{CONTIG11:287764:289761:-}	{gi|568460408|ref|XP_006462583.1|; hypothetical protein [Agaricus bisporus var. bisporus H97, AGABI2DRAFT_119436]}	{NA}	{abv:AGABI2DRAFT119436; }	{NA}	{GO:0005524; ATP binding; molecular_function GO:0003723; RNA binding; molecular_function GO:0043531; ADP binding; molecular_function GO:0000166; nucleotide binding; molecular_function GO:0003724; RNA helicase activity; molecular_function}	{NA}
A00488	{CONTIG11:291592:294054:-}	{gi|568460408|ref|XP_006462583.1|; hypothetical protein [Agaricus bisporus var. bisporus H97, AGABI2DRAFT_119436]}	{NA}	{abv:AGABI2DRAFT119436; }	{NA}	{GO:0005524; ATP binding; molecular_function}	{NA}
A00489	{CONTIG11:294753:297111:-}	{gi|568449486|ref|XP_006458953.1|; hypothetical protein [Agaricus bisporus var. bisporus H97, AGABI2DRAFT_115916]}	{NA}	{abv:AGABI2DRAFT115916; }	{NA}	{GO:0016887; ATPase activity; molecular_function GO:0003723; RNA binding; molecular_function GO:0005524; ATP binding; molecular_function GO:0003724; RNA helicase activity; molecular_function}	{NA}
A00490	{CONTIG11:298441:303960:-}	{gi|568449486|ref|XP_006458953.1|; hypothetical protein [Agaricus bisporus var. bisporus H97, AGABI2DRAFT_115916]}	{NA}	{abv:AGABI2DRAFT115916; }	{NA}	{GO:0016887; ATPase activity; molecular_function GO:0003723; RNA binding; molecular_function GO:0005664; nuclear origin of replication recognition complex; cellular_component GO:0005524; ATP binding; molecular_function GO:0003924; GTPase activity; molecular_function GO:0003677; DNA binding; molecular_function GO:0005525; GTP binding; molecular_function GO:0000166; nucleotide binding; molecular_fu…	{NA}
A00491	{CONTIG11:306182:307867:-}	{gi|597980923|ref|XP_007329764.1|; hypothetical protein [Agaricus bisporus var. burnettii JB137-S8, AGABI1DRAFT_74180]}	{NA}	{abp:AGABI1DRAFT74180; }	{NA}	{NA}	{NA}
A00492	{CONTIG11:309501:311901:-}	{gi|568460408|ref|XP_006462583.1|; hypothetical protein [Agaricus bisporus var. bisporus H97, AGABI2DRAFT_119436]}	{NA}	{abv:AGABI2DRAFT119436; }	{NA}	{GO:0043531; ADP binding; molecular_function GO:0003724; RNA helicase activity; molecular_function GO:0003723; RNA binding; molecular_function GO:0005524; ATP binding; molecular_function}	{NA}
A00493	{CONTIG11:312765:313484:-}	{gi|597984907|ref|XP_007330732.1|; hypothetical protein [Agaricus bisporus var. burnettii JB137-S8, AGABI1DRAFT_114498]}	{NA}	{abp:AGABI1DRAFT114498; }	{NA}	{NA}	{NA}
A00494	{CONTIG11:314892:315728:-}	{gi|568449537|ref|XP_006458970.1|; hypothetical protein [Agaricus bisporus var. bisporus H97, AGABI2DRAFT_191062]}	{NA}	{abv:AGABI2DRAFT191062; }	{NA}	{GO:0005634; nucleus; cellular_component GO:0032040; small-subunit processome; cellular_component GO:0008565; protein transporter activity; molecular_function GO:0003677; DNA binding; molecular_function GO:0006351; transcription, DNA-dependent; biological_process GO:0006355; regulation of transcription, DNA-dependent; biological_process GO:0016021; integral to membrane; cellular_component GO:0015…	{NA}
A00495	{CONTIG11:315909:317051:+}	{gi|568449541|ref|XP_006458971.1|; hypothetical protein [Agaricus bisporus var. bisporus H97, AGABI2DRAFT_200849]}	{Q54E29; THG1_DICDI Probable tRNA(His) guanylyltransferase OS=Dictyostelium discoideum GN=thg1 PE=3 SV=1}	{abv:AGABI2DRAFT200849; K10761 THG1 tRNA(His) guanylyltransferase 2.7.7.79 }	{Hs8923514; KOG2721 Uncharacterized conserved protein S Function unknown ;}	{GO:0000287; magnesium ion binding; molecular_function GO:0008193; tRNA guanylyltransferase activity; molecular_function GO:0006400; tRNA modification; biological_process}	{NA}
A00496	{CONTIG11:321706:322401:-}	{gi|238597638|ref|XP_002394381.1|; hypothetical protein [Moniliophthora perniciosa FA553, MPER_05734]}	{NA}	{mpr:MPER_05734; K11366 USP22_27_51, UBP8 ubiquitin carboxyl-terminal hydrolase 22/27/51 3.4.19.12 }	{NA}	{GO:0005737; cytoplasm; cellular_component GO:0004221; ubiquitin thiolesterase activity; molecular_function GO:0004190; aspartic-type endopeptidase activity; molecular_function GO:0016021; integral to membrane; cellular_component GO:0005852; eukaryotic translation initiation factor 3 complex; cellular_component GO:0006511; ubiquitin-dependent protein catabolic process; biological_process GO:00037…	{NA}
A00497	{CONTIG11:326574:328975:+}	{gi|597987485|ref|XP_007331359.1|; hypothetical protein [Agaricus bisporus var. burnettii JB137-S8, AGABI1DRAFT_114840]}	{O34714; OXDC_BACSU Oxalate decarboxylase OxdC OS=Bacillus subtilis (strain 168) GN=oxdC PE=1 SV=1}	{abp:AGABI1DRAFT114840; }	{NA}	{GO:0016779; nucleotidyltransferase activity; molecular_function GO:0045735; NA GO:0005515; protein binding; molecular_function GO:0005976; polysaccharide metabolic process; biological_process GO:0006355; regulation of transcription, DNA-dependent; biological_process}	{NA}
A00498	{CONTIG11:333177:333875:-}	{gi|568449715|ref|XP_006459029.1|; hypothetical protein [Agaricus bisporus var. bisporus H97, AGABI2DRAFT_200955]}	{NA}	{abv:AGABI2DRAFT200955; }	{NA}	{NA}	{NA}
A00499	{CONTIG11:334475:335619:-}	{gi|597987489|ref|XP_007331360.1|; hypothetical protein [Agaricus bisporus var. burnettii JB137-S8, AGABI1DRAFT_114841]}	{NA}	{abp:AGABI1DRAFT114841; }	{NA}	{NA}	{NA}
A00500	{CONTIG11:336364:337599:+}	{gi|299750272|ref|XP_001836646.2|; protein phosphatase methylesterase 1 [Coprinopsis cinerea okayama7#130]}	{NA}	{cci:CC1G_06233; K13617 PPME1 protein phosphatase methylesterase 1 3.1.1.89 }	{NA}	{GO:0006505; GPI anchor metabolic process; biological_process GO:0006886; intracellular protein transport; biological_process GO:0009058; biosynthetic process; biological_process GO:0016788; hydrolase activity, acting on ester bonds; molecular_function}	{NA}
A00501	{CONTIG11:339394:341482:+}	{gi|568449563|ref|XP_006458978.1|; hypothetical protein [Agaricus bisporus var. bisporus H97, AGABI2DRAFT_200866]}	{NA}	{abv:AGABI2DRAFT200866; }	{NA}	{GO:0016787; hydrolase activity; molecular_function GO:0008152; NA GO:0008236; serine-type peptidase activity; molecular_function GO:0006508; proteolysis; biological_process}	{NA}
A00502	{CONTIG11:345008:346847:+}	{gi|636602997|ref|XP_008032633.1|; alpha/beta-hydrolase [Trametes versicolor FP-101664 SS1]}	{NA}	{tvs:TRAVEDRAFT_109109; }	{NA}	{GO:0008152; NA GO:0016787; hydrolase activity; molecular_function GO:0006508; proteolysis; biological_process GO:0008236; serine-type peptidase activity; molecular_function}	{NA}
A00503	{CONTIG11:348195:352734:+}	{gi|597987493|ref|XP_007331361.1|; hypothetical protein [Agaricus bisporus var. burnettii JB137-S8, AGABI1DRAFT_114842]}	{NA}	{abp:AGABI1DRAFT107765; }	{NA}	{GO:0006508; proteolysis; biological_process GO:0008236; serine-type peptidase activity; molecular_function GO:0008152; NA GO:0016787; hydrolase activity; molecular_function}	{NA}
A00504	{CONTIG11:356520:358391:+}	{gi|568449572|ref|XP_006458981.1|; hypothetical protein [Agaricus bisporus var. bisporus H97, AGABI2DRAFT_115945]}	{NA}	{abv:AGABI2DRAFT115945; }	{NA}	{NA}	{NA}
A00505	{CONTIG11:363479:364550:+}	{gi|597987505|ref|XP_007331364.1|; hypothetical protein [Agaricus bisporus var. burnettii JB137-S8, AGABI1DRAFT_101284]}	{O14088; YER5_SCHPO Uncharacterized oxidoreductase C2F3.05c OS=Schizosaccharomyces pombe (strain 972 / ATCC 24843) GN=SPAC2F3.05c PE=3 SV=1}	{abp:AGABI1DRAFT101284; }	{SPAC2F3.05c; KOG1577 Aldo/keto reductase family proteins R General function prediction only ;}	{NA}	{NA}
A00506	{CONTIG11:373033:374270:+}	{gi|299750119|ref|XP_001836552.2|; hypothetical protein [Coprinopsis cinerea okayama7#130, CC1G_10046]}	{NA}	{cci:CC1G_10046; K06694 PSMD10 26S proteasome non-ATPase regulatory subunit 10 -- }	{NA}	{GO:0005515; protein binding; molecular_function}	{NA}
A00507	{CONTIG11:377276:378568:-}	{gi|597987055|ref|XP_007331254.1|; hypothetical protein [Agaricus bisporus var. burnettii JB137-S8, AGABI1DRAFT_76352]}	{A8NE23; COP3_COPC7 Alpha-muurolene synthase OS=Coprinopsis cinerea (strain Okayama-7 / 130 / ATCC MYA-4618 / FGSC 9003) GN=COP3 PE=1 SV=1}	{abp:AGABI1DRAFT76352; }	{NA}	{GO:0000287; magnesium ion binding; molecular_function GO:0045482; trichodiene synthase activity; molecular_function GO:0016829; lyase activity; molecular_function GO:0016106; sesquiterpenoid biosynthetic process; biological_process GO:0010333; terpene synthase activity; molecular_function}	{NA}
A00508	{CONTIG11:381659:384259:-}	{gi|568449599|ref|XP_006458990.1|; hypothetical protein [Agaricus bisporus var. bisporus H97, AGABI2DRAFT_191081]}	{NA}	{abv:AGABI2DRAFT191081; }	{NA}	{GO:0006355; regulation of transcription, DNA-dependent; biological_process GO:0005634; nucleus; cellular_component GO:0003700; sequence-specific DNA binding transcription factor activity; molecular_function}	{NA}
A00509	{CONTIG11:389555:390281:+}	{NA}	{NA}	{NA}	{NA}	{NA}	{NA}
A00510	{CONTIG11:391450:393221:+}	{gi|568460408|ref|XP_006462583.1|; hypothetical protein [Agaricus bisporus var. bisporus H97, AGABI2DRAFT_119436]}	{NA}	{abv:AGABI2DRAFT119436; }	{NA}	{GO:0005524; ATP binding; molecular_function GO:0043531; ADP binding; molecular_function}	{NA}
A00511	{CONTIG11:394850:397025:+}	{gi|568460408|ref|XP_006462583.1|; hypothetical protein [Agaricus bisporus var. bisporus H97, AGABI2DRAFT_119436]}	{NA}	{abv:AGABI2DRAFT119436; }	{NA}	{GO:0003723; RNA binding; molecular_function GO:0016887; ATPase activity; molecular_function GO:0003924; GTPase activity; molecular_function GO:0005524; ATP binding; molecular_function GO:0005525; GTP binding; molecular_function GO:0043531; ADP binding; molecular_function GO:0003724; RNA helicase activity; molecular_function}	{NA}
A00512	{CONTIG11:399130:400390:+}	{gi|7413491|emb|CAB85687.1|; B-(1-6) glucan synthase [Agaricus bisporus]}	{NA}	{abv:AGABI2DRAFT191083; }	{NA}	{NA}	{CAB85687.1_GH17; {&beta;-1,6-glucan synthase (Dag3) (fragment);--;Agaricus bisporus HORST U3;Q9P8B3} glucan endo-1,3-&beta;-glucosidase (EC 3.2.1.39); glucan 1,3-&beta;-glucosidase (EC 3.2.1.58); licheninase (EC 3.2.1.73); ABA-specific &beta;-glucosidase (EC 3.2.1.175); &beta;-1,3-glucanosyltransglycosylase (EC 2.4.1.-) NA}
A00513	{CONTIG11:401342:403422:+}	{gi|648164996|gb|KDR78676.1|; hypothetical protein [Galerina marginata CBS 339.88, GALMADRAFT_1262381]}	{NA}	{abp:AGABI1DRAFT114859; }	{NA}	{GO:0005515; protein binding; molecular_function}	{NA}
A00514	{CONTIG11:410301:415517:+}	{gi|568449646|ref|XP_006459006.1|; hypothetical protein [Agaricus bisporus var. bisporus H97, AGABI2DRAFT_115966]}	{NA}	{abv:AGABI2DRAFT217865; }	{NA}	{GO:0050660; flavin adenine dinucleotide binding; molecular_function GO:0016614; oxidoreductase activity, acting on CH-OH group of donors; molecular_function GO:0016117; carotenoid biosynthetic process; biological_process GO:0016491; oxidoreductase activity; molecular_function GO:0050661; NADP binding; molecular_function GO:0004499; flavin-containing monooxygenase activity; molecular_function GO:…	{NA}
A00515	{CONTIG11:419144:420309:+}	{gi|597987593|ref|XP_007331386.1|; hypothetical protein [Agaricus bisporus var. burnettii JB137-S8, AGABI1DRAFT_114866]}	{NA}	{abp:AGABI1DRAFT114866; }	{NA}	{NA}	{ACN56442.1_CBM13; {ORF;--;Agaricus bisporus;C0LAM1} Modules of approx. 150 residues which always appear as a threefold internal repeat. The only apparent exception to this, xylanase II of Actinomadura sp. FC7 (GenBank U08894), is in fact not completely sequenced. These modules were first identified in several plant lectins such as ricin or agglutinin of Ricinus communis which bind galactose resi…
A00516	{CONTIG11:420573:422219:-}	{gi|597987597|ref|XP_007331387.1|; hypothetical protein [Agaricus bisporus var. burnettii JB137-S8, AGABI1DRAFT_129808]}	{NA}	{abp:AGABI1DRAFT129808; }	{NA}	{NA}	{NA}
A00517	{CONTIG11:430410:431808:+}	{gi|568449454|ref|XP_006458942.1|; hypothetical protein [Agaricus bisporus var. bisporus H97, AGABI2DRAFT_200800]}	{NA}	{abv:AGABI2DRAFT200800; }	{NA}	{GO:0009059; macromolecule biosynthetic process; biological_process GO:0030176; integral to endoplasmic reticulum membrane; cellular_component}	{NA}
A00518	{CONTIG11:432486:434661:-}	{gi|597986931|ref|XP_007331223.1|; hypothetical protein [Agaricus bisporus var. burnettii JB137-S8, AGABI1DRAFT_60983]}	{O09173; HGD_MOUSE Homogentisate 1,2-dioxygenase OS=Mus musculus GN=Hgd PE=1 SV=2}	{abp:AGABI1DRAFT60983; K00451 HGD, hmgA homogentisate 1,2-dioxygenase 1.13.11.5 Metabolism; Amino acid metabolism; Tyrosine metabolism [PATH:ko00350] Metabolism; Xenobiotics biodegradation and metabolism; Styrene degradation [PATH:ko00643] }	{Hs4504381; KOG1417 Homogentisate 1,2-dioxygenase E Amino acid transport and metabolism ;}	{GO:0004411; homogentisate 1,2-dioxygenase activity; molecular_function GO:0006570; tyrosine metabolic process; biological_process GO:0006559; L-phenylalanine catabolic process; biological_process GO:0055114; oxidation-reduction process; biological_process}	{NA}
A00519	{CONTIG11:434918:437484:-}	{gi|597987613|ref|XP_007331391.1|; hypothetical protein [Agaricus bisporus var. burnettii JB137-S8, AGABI1DRAFT_121674]}	{NA}	{abp:AGABI1DRAFT121674; }	{NA}	{GO:0003824; NA GO:0016624; oxidoreductase activity, acting on the aldehyde or oxo group of donors, disulfide as acceptor; molecular_function GO:0008152; NA GO:0030976; thiamine pyrophosphate binding; molecular_function}	{NA}
A00520	{CONTIG11:442975:444282:+}	{gi|597986935|ref|XP_007331224.1|; hypothetical protein AGABI1DRAFT_60990, partial [Agaricus bisporus var. burnettii JB137-S8]}	{NA}	{abp:AGABI1DRAFT60990; }	{NA}	{NA}	{NA}
A00521	{CONTIG11:444927:449036:+}	{gi|568449679|ref|XP_006459017.1|; hypothetical protein [Agaricus bisporus]}	{Q8J1R4; TBB2_SUIBO Tubulin beta-2 chain OS=Suillus bovinus GN=TUBB2 PE=2 SV=1}	{abp:AGABI1DRAFT60995; K07375 TUBB tubulin beta -- Cellular Processes; Transport and catabolism; Phagosome [PATH:ko04145] Cellular Processes; Cellular community - eukaryotes; Gap junction [PATH:ko04540] Human Diseases; Infectious diseases; Pathogenic Escherichia coli infection [PATH:ko05130] }	{CE00913; KOG1375 Beta tubulin Z Cytoskeleton ;}	{GO:0043234; protein complex; cellular_component GO:0003924; GTPase activity; molecular_function GO:0016627; oxidoreductase activity, acting on the CH-CH group of donors; molecular_function GO:0051258; protein polymerization; biological_process GO:0006184; GTP catabolic process; biological_process GO:0005525; GTP binding; molecular_function GO:0006629; lipid metabolic process; biological_process …	{NA}
A00522	{CONTIG11:449754:451593:+}	{gi|597986943|ref|XP_007331226.1|; hypothetical protein [Agaricus bisporus var. burnettii JB137-S8, AGABI1DRAFT_60999]}	{NA}	{abp:AGABI1DRAFT60999; }	{NA}	{NA}	{NA}
A00523	{CONTIG11:451691:454253:-}	{gi|597995339|ref|XP_007333248.1|; hypothetical protein [Agaricus bisporus var. burnettii JB137-S8, AGABI1DRAFT_109006]}	{NA}	{abp:AGABI1DRAFT109006; }	{NA}	{GO:0003724; RNA helicase activity; molecular_function GO:0098519; NA GO:0003723; RNA binding; molecular_function GO:0005524; ATP binding; molecular_function}	{NA}
A00524	{CONTIG11:459488:460829:+}	{gi|170116612|ref|XP_001889496.1|; predicted protein [Laccaria bicolor S238N-H82]}	{NA}	{lbc:LACBIDRAFT_293771; }	{NA}	{NA}	{NA}
A00525	{CONTIG11:467394:467901:+}	{gi|648159888|gb|KDR73610.1|; hypothetical protein [Galerina marginata CBS 339.88, GALMADRAFT_158098]}	{NA}	{lbc:LACBIDRAFT_306191; }	{NA}	{NA}	{NA}
A00526	{CONTIG11:468235:469140:-}	{NA}	{NA}	{NA}	{NA}	{GO:0055085; transmembrane transport; biological_process GO:0016021; integral to membrane; cellular_component}	{NA}
A00527	{CONTIG11:471260:472909:-}	{gi|568449691|ref|XP_006459021.1|; hypothetical protein [Agaricus bisporus var. bisporus H97, AGABI2DRAFT_200943]}	{NA}	{abv:AGABI2DRAFT200943; }	{NA}	{GO:0016021; integral to membrane; cellular_component GO:0055085; transmembrane transport; biological_process GO:0022857; transmembrane transporter activity; molecular_function}	{NA}
A00528	{CONTIG11:487637:490677:+}	{gi|597987073|ref|XP_007331258.1|; hypothetical protein [Agaricus bisporus var. burnettii JB137-S8, AGABI1DRAFT_76421]}	{P0CS23; UREA_CRYNB Urease OS=Cryptococcus neoformans var. neoformans serotype D (strain B-3501A) GN=URE1 PE=3 SV=1}	{abp:AGABI1DRAFT76421; K01427 URE urease 3.5.1.5 Metabolism; Amino acid metabolism; Arginine biosynthesis [PATH:ko00220] Metabolism; Nucleotide metabolism; Purine metabolism [PATH:ko00230] Metabolism; Xenobiotics biodegradation and metabolism; Atrazine degradation [PATH:ko00791] }	{NA}	{GO:0019627; urea metabolic process; biological_process GO:0016151; nickel ion binding; molecular_function GO:0016787; hydrolase activity; molecular_function GO:0009039; urease activity; molecular_function GO:0043419; urea catabolic process; biological_process}	{NA}
A00529	{CONTIG11:491705:492466:+}	{gi|568449709|ref|XP_006459027.1|; hypothetical protein [Agaricus bisporus var. bisporus H97, AGABI2DRAFT_191107]}	{NA}	{abv:AGABI2DRAFT191107; }	{NA}	{NA}	{NA}
A00530	{CONTIG11:496591:497363:-}	{gi|568449715|ref|XP_006459029.1|; hypothetical protein [Agaricus bisporus var. bisporus H97, AGABI2DRAFT_200955]}	{NA}	{abv:AGABI2DRAFT200955; }	{NA}	{NA}	{NA}
A00531	{CONTIG11:501401:502733:-}	{gi|597987643|ref|XP_007331400.1|; hypothetical protein [Agaricus bisporus var. burnettii JB137-S8, AGABI1DRAFT_114885]}	{NA}	{abp:AGABI1DRAFT114885; }	{NA}	{GO:0003676; nucleic acid binding; molecular_function}	{NA}
A00532	{CONTIG11:503345:505613:-}	{gi|597987077|ref|XP_007331259.1|; hypothetical protein [Agaricus bisporus var. burnettii JB137-S8, AGABI1DRAFT_76426]}	{NA}	{abp:AGABI1DRAFT76426; }	{NA}	{NA}	{NA}
A00533	{CONTIG11:512442:515840:-}	{gi|568459308|ref|XP_006462218.1|; hypothetical protein [Agaricus bisporus var. bisporus H97, AGABI2DRAFT_206463]}	{NA}	{abv:AGABI2DRAFT206463; }	{NA}	{GO:0005471; ATP:ADP antiporter activity; molecular_function GO:0055085; transmembrane transport; biological_process GO:0022857; transmembrane transporter activity; molecular_function GO:0006810; transport; biological_process GO:0016021; integral to membrane; cellular_component GO:0005524; ATP binding; molecular_function}	{NA}
A00534	{CONTIG11:523807:526357:+}	{NA}	{NA}	{NA}	{NA}	{GO:0006606; protein import into nucleus; biological_process GO:0005643; nuclear pore; cellular_component}	{NA}
A00535	{CONTIG11:529749:531958:+}	{gi|568460408|ref|XP_006462583.1|; hypothetical protein [Agaricus bisporus var. bisporus H97, AGABI2DRAFT_119436]}	{NA}	{abv:AGABI2DRAFT119436; }	{NA}	{GO:0005524; ATP binding; molecular_function GO:0016887; ATPase activity; molecular_function}	{NA}
A00536	{CONTIG11:533433:536426:+}	{gi|568449742|ref|XP_006459038.1|; hypothetical protein [Agaricus bisporus var. bisporus H97, AGABI2DRAFT_115997]}	{NA}	{abv:AGABI2DRAFT115997; }	{NA}	{GO:0005515; protein binding; molecular_function}	{NA}
A00537	{CONTIG11:539781:541274:+}	{NA}	{NA}	{NA}	{NA}	{NA}	{NA}
A00538	{CONTIG11:543048:543857:-}	{NA}	{NA}	{NA}	{NA}	{NA}	{NA}
A00539	{CONTIG11:544936:545316:-}	{gi|238577283|ref|XP_002388339.1|; hypothetical protein [Moniliophthora perniciosa FA553, MPER_12650]}	{NA}	{NA}	{NA}	{GO:0015074; DNA integration; biological_process}	{NA}
A00540	{CONTIG11:549514:549951:-}	{gi|598003803|ref|XP_007335258.1|; hypothetical protein [Agaricus bisporus var. burnettii JB137-S8, AGABI1DRAFT_133631]}	{NA}	{abv:AGABI2DRAFT122553; }	{NA}	{NA}	{NA}
A00541	{CONTIG11:551236:551511:+}	{NA}	{NA}	{NA}	{NA}	{NA}	{NA}
A00542	{CONTIG11:566664:567218:+}	{NA}	{NA}	{NA}	{NA}	{NA}	{NA}
A00543	{CONTIG11:570093:570884:-}	{NA}	{NA}	{NA}	{NA}	{NA}	{NA}
A00544	{CONTIG11:571172:571576:-}	{NA}	{NA}	{NA}	{NA}	{GO:0005737; cytoplasm; cellular_component GO:0008289; lipid binding; molecular_function GO:0004872; receptor activity; molecular_function GO:0016020; membrane; cellular_component GO:0000902; cell morphogenesis; biological_process}	{NA}
A00545	{CONTIG11:572131:576257:-}	{gi|599411139|ref|XP_007403009.1|; hypothetical protein PHACADRAFT_58702, partial [Phanerochaete carnosa HHB-10118-sp]}	{NA}	{tvs:TRAVEDRAFT_86253; }	{NA}	{GO:0003964; RNA-directed DNA polymerase activity; molecular_function GO:0003723; RNA binding; molecular_function GO:0006278; RNA-dependent DNA replication; biological_process GO:0008270; zinc ion binding; molecular_function GO:0015074; DNA integration; biological_process GO:0003676; nucleic acid binding; molecular_function}	{NA}
A00546	{CONTIG11:578144:578592:+}	{NA}	{NA}	{NA}	{NA}	{NA}	{NA}
A00547	{CONTIG11:580774:581577:+}	{gi|353240028|emb|CCA71915.1|; related to transposase-Wolbachia endosymbiont [Piriformospora indica DSM 11827]}	{NA}	{tvs:TRAVEDRAFT_86288; }	{NA}	{GO:0006313; transposition, DNA-mediated; biological_process GO:0006355; regulation of transcription, DNA-dependent; biological_process GO:0006310; DNA recombination; biological_process GO:0000150; recombinase activity; molecular_function GO:0003700; sequence-specific DNA binding transcription factor activity; molecular_function GO:0015074; DNA integration; biological_process GO:0005622; intracel…	{NA}
A00548	{CONTIG11:584817:586658:-}	{gi|568449486|ref|XP_006458953.1|; hypothetical protein [Agaricus bisporus var. bisporus H97, AGABI2DRAFT_115916]}	{NA}	{abv:AGABI2DRAFT115916; }	{NA}	{GO:0043531; ADP binding; molecular_function GO:0016887; ATPase activity; molecular_function GO:0005524; ATP binding; molecular_function}	{NA}
A00549	{CONTIG11:587954:589765:-}	{gi|597980923|ref|XP_007329764.1|; hypothetical protein [Agaricus bisporus var. burnettii JB137-S8, AGABI1DRAFT_74180]}	{NA}	{abp:AGABI1DRAFT74180; }	{NA}	{GO:0005524; ATP binding; molecular_function GO:0016887; ATPase activity; molecular_function}	{NA}
A00550	{CONTIG11:593172:594998:-}	{gi|568449486|ref|XP_006458953.1|; hypothetical protein [Agaricus bisporus var. bisporus H97, AGABI2DRAFT_115916]}	{NA}	{abv:AGABI2DRAFT115916; }	{NA}	{NA}	{NA}
A00551	{CONTIG11:596274:598541:+}	{gi|568454172|ref|XP_006460513.1|; hypothetical protein [Agaricus bisporus var. bisporus H97, AGABI2DRAFT_68342]}	{NA}	{abv:AGABI2DRAFT68342; }	{NA}	{NA}	{NA}
A00552	{CONTIG11:599036:600085:-}	{gi|597978245|ref|XP_007329109.1|; hypothetical protein [Agaricus bisporus var. burnettii JB137-S8, AGABI1DRAFT_127448]}	{NA}	{abp:AGABI1DRAFT127448; }	{NA}	{NA}	{NA}
A00553	{CONTIG11:602124:604114:-}	{gi|568449748|ref|XP_006459040.1|; hypothetical protein [Agaricus bisporus var. bisporus H97, AGABI2DRAFT_191117]}	{NA}	{abv:AGABI2DRAFT191117; K14284 NXF, TAP, MEX67 nuclear RNA export factor -- Genetic Information Processing; Translation; Ribosome biogenesis in eukaryotes [PATH:ko03008] Genetic Information Processing; Translation; RNA transport [PATH:ko03013] Genetic Information Processing; Translation; mRNA surveillance pathway [PATH:ko03015] Human Diseases; Infectious diseases; Influenza A [PATH:ko05164] Human…	{NA}	{GO:0006810; transport; biological_process GO:0005622; intracellular; cellular_component GO:0051028; mRNA transport; biological_process GO:0005634; nucleus; cellular_component}	{NA}
A00554	{CONTIG11:606925:607388:-}	{gi|568443663|ref|XP_006457023.1|; hypothetical protein [Agaricus bisporus var. bisporus H97, AGABI2DRAFT_122896]}	{NA}	{abv:AGABI2DRAFT122896; }	{NA}	{NA}	{NA}
A00555	{CONTIG11:611787:613529:+}	{gi|597995423|ref|XP_007333269.1|; hypothetical protein [Agaricus bisporus var. burnettii JB137-S8, AGABI1DRAFT_102557]}	{NA}	{abp:AGABI1DRAFT102557; }	{NA}	{GO:0016021; integral to membrane; cellular_component GO:0055085; transmembrane transport; biological_process}	{NA}
A00556	{CONTIG11:613905:615249:-}	{gi|568449760|ref|XP_006459044.1|; hypothetical protein [Agaricus bisporus var. bisporus H97, AGABI2DRAFT_183842]}	{B9W4V6; APO1_AGRAE Aromatic peroxygenase OS=Agrocybe aegerita GN=APO1 PE=1 SV=1}	{abv:AGABI2DRAFT183842; K21820 APO1 unspecific peroxygenase 1.11.2.1 }	{NA}	{GO:0004601; peroxidase activity; molecular_function}	{NA}
A00557	{CONTIG11:616529:617876:-}	{gi|568449760|ref|XP_006459044.1|; hypothetical protein [Agaricus bisporus var. bisporus H97, AGABI2DRAFT_183842]}	{B9W4V6; APO1_AGRAE Aromatic peroxygenase OS=Agrocybe aegerita GN=APO1 PE=1 SV=1}	{abv:AGABI2DRAFT183842; K21820 APO1 unspecific peroxygenase 1.11.2.1 }	{NA}	{GO:0004601; peroxidase activity; molecular_function}	{NA}
A00558	{CONTIG11:622799:623887:-}	{gi|597993729|ref|XP_007332853.1|; hypothetical protein [Agaricus bisporus var. burnettii JB137-S8, AGABI1DRAFT_102278]}	{NA}	{abp:AGABI1DRAFT102278; }	{NA}	{NA}	{NA}
A00559	{CONTIG11:624816:628161:-}	{gi|597987703|ref|XP_007331415.1|; hypothetical protein [Agaricus bisporus var. burnettii JB137-S8, AGABI1DRAFT_107816]}	{Q4P7Z8; DBP5_USTMA ATP-dependent RNA helicase DBP5 OS=Ustilago maydis (strain 521 / FGSC 9021) GN=DBP5 PE=3 SV=1}	{abp:AGABI1DRAFT107816; K18655 DDX19, DBP5 ATP-dependent RNA helicase DDX19/DBP5 3.6.4.13 }	{SPBC12C2.06; KOG0332 ATP-dependent RNA helicase A RNA processing and modification ;}	{GO:0003676; nucleic acid binding; molecular_function GO:0005524; ATP binding; molecular_function GO:0008026; ATP-dependent helicase activity; molecular_function GO:0004386; helicase activity; molecular_function}	{NA}
A00560	{CONTIG11:628524:629859:+}	{gi|568448251|ref|XP_006458547.1|; hypothetical protein [Agaricus bisporus var. bisporus H97, AGABI2DRAFT_176843]}	{NA}	{abv:AGABI2DRAFT176843; }	{NA}	{GO:0005515; protein binding; molecular_function}	{NA}
A00561	{CONTIG11:630868:632002:+}	{NA}	{NA}	{NA}	{NA}	{NA}	{NA}
A00562	{CONTIG11:633827:635635:+}	{gi|568449486|ref|XP_006458953.1|; hypothetical protein [Agaricus bisporus var. bisporus H97, AGABI2DRAFT_115916]}	{NA}	{abv:AGABI2DRAFT115916; }	{NA}	{GO:0016887; ATPase activity; molecular_function GO:0005524; ATP binding; molecular_function}	{NA}
A00563	{CONTIG11:637032:638891:+}	{gi|597980923|ref|XP_007329764.1|; hypothetical protein [Agaricus bisporus var. burnettii JB137-S8, AGABI1DRAFT_74180]}	{NA}	{abp:AGABI1DRAFT74180; }	{NA}	{GO:0003724; RNA helicase activity; molecular_function GO:0003723; RNA binding; molecular_function GO:0016887; ATPase activity; molecular_function GO:0005524; ATP binding; molecular_function}	{NA}
A00564	{CONTIG11:640944:642960:-}	{gi|568449789|ref|XP_006459054.1|; hypothetical protein AGABI2DRAFT_217942, partial [Agaricus bisporus var. bisporus H97]}	{NA}	{abv:AGABI2DRAFT217942; K14791 PWP1 periodic tryptophan protein 1 -- }	{NA}	{GO:0005515; protein binding; molecular_function}	{NA}
A00565	{CONTIG11:644613:647725:+}	{gi|568448496|ref|XP_006458627.1|; hypothetical protein [Agaricus bisporus var. bisporus H97, AGABI2DRAFT_217363]}	{NA}	{abv:AGABI2DRAFT217363; }	{NA}	{GO:0016705; oxidoreductase activity, acting on paired donors, with incorporation or reduction of molecular oxygen; molecular_function GO:0005506; iron ion binding; molecular_function GO:0020037; heme binding; molecular_function GO:0055114; oxidation-reduction process; biological_process}	{NA}
A00566	{CONTIG11:649966:651928:-}	{gi|568449795|ref|XP_006459056.1|; hypothetical protein [Agaricus bisporus var. bisporus H97, AGABI2DRAFT_191124]}	{P49602; CP51_USTMA Lanosterol 14-alpha demethylase OS=Ustilago maydis (strain 521 / FGSC 9021) GN=ERG11 PE=3 SV=1}	{abv:AGABI2DRAFT191124; K05917 CYP51 sterol 14-demethylase 1.14.13.70 Metabolism; Lipid metabolism; Steroid biosynthesis [PATH:ko00100] }	{SPAC13A11.02c; KOG0684 Cytochrome P450 Q Secondary metabolites biosynthesis, transport and catabolism ;}	{GO:0016705; oxidoreductase activity, acting on paired donors, with incorporation or reduction of molecular oxygen; molecular_function GO:0020037; heme binding; molecular_function GO:0055114; oxidation-reduction process; biological_process GO:0005506; iron ion binding; molecular_function}	{NA}
A00567	{CONTIG11:652638:654549:-}	{gi|597995423|ref|XP_007333269.1|; hypothetical protein [Agaricus bisporus var. burnettii JB137-S8, AGABI1DRAFT_102557]}	{NA}	{abp:AGABI1DRAFT102557; }	{NA}	{GO:0055085; transmembrane transport; biological_process GO:0016021; integral to membrane; cellular_component}	{NA}
A00568	{CONTIG11:656097:658018:-}	{gi|568438700|ref|XP_006455371.1|; hypothetical protein [Agaricus bisporus]}	{NA}	{abp:AGABI1DRAFT107690; }	{NA}	{GO:0016021; integral to membrane; cellular_component GO:0055085; transmembrane transport; biological_process}	{NA}
A00569	{CONTIG11:660846:662776:-}	{gi|568438700|ref|XP_006455371.1|; hypothetical protein [Agaricus bisporus]}	{NA}	{abp:AGABI1DRAFT107690; }	{NA}	{GO:0055085; transmembrane transport; biological_process GO:0016021; integral to membrane; cellular_component}	{NA}
A00570	{CONTIG11:664890:667947:-}	{gi|597986955|ref|XP_007331229.1|; hypothetical protein [Agaricus bisporus var. burnettii JB137-S8, AGABI1DRAFT_61044]}	{NA}	{abp:AGABI1DRAFT61044; }	{NA}	{GO:0004540; ribonuclease activity; molecular_function GO:0003723; RNA binding; molecular_function}	{NA}
A00571	{CONTIG11:668035:669490:+}	{gi|568449804|ref|XP_006459059.1|; hypothetical protein AGABI2DRAFT_191127, partial [Agaricus bisporus var. bisporus H97]}	{NA}	{abv:AGABI2DRAFT191127; }	{NA}	{GO:0005739; mitochondrion; cellular_component GO:0008137; NADH dehydrogenase (ubiquinone) activity; molecular_function}	{NA}
A00572	{CONTIG11:669695:671012:-}	{gi|568449807|ref|XP_006459060.1|; hypothetical protein [Agaricus bisporus var. bisporus H97, AGABI2DRAFT_191128]}	{NA}	{abv:AGABI2DRAFT191128; K08856 STK16 serine/threonine kinase 16 2.7.11.1 }	{7298833; KOG2345 Serine/threonine protein kinase/TGF-beta stimulated factor KIT Transcription ; Lipid transport and metabolism ; Signal transduction mechanisms ;}	{GO:0004672; protein kinase activity; molecular_function GO:0006468; protein phosphorylation; biological_process GO:0005524; ATP binding; molecular_function}	{NA}
A00573	{CONTIG11:675037:677232:-}	{NA}	{NA}	{NA}	{NA}	{NA}	{NA}
A00574	{CONTIG11:677479:690179:-}	{gi|568449816|ref|XP_006459063.1|; hypothetical protein [Agaricus bisporus var. bisporus H97, AGABI2DRAFT_217954]}	{Q10289; FAS2_SCHPO Fatty acid synthase subunit alpha OS=Schizosaccharomyces pombe (strain 972 / ATCC 24843) GN=fas2 PE=1 SV=2}	{abp:AGABI1DRAFT61049; }	{NA}	{GO:0009405; pathogenesis; biological_process GO:0008152; NA GO:0004318; enoyl-[acyl-carrier-protein] reductase (NADH) activity; molecular_function GO:0016491; oxidoreductase activity; molecular_function GO:0008897; holo-[acyl-carrier-protein] synthase activity; molecular_function GO:0005509; calcium ion binding; molecular_function GO:0055114; oxidation-reduction process; biological_process GO:00…	{NA}
A00575	{CONTIG11:692999:695031:-}	{gi|46194172|tpg|DAA01997.1|; TPA_exp: reverse transcriptase/ribonuclease H [Coprinopsis cinerea] [other]}	{NA}	{NA}	{NA}	{GO:0004523; ribonuclease H activity; molecular_function}	{NA}
A00576	{CONTIG11:695673:696497:-}	{NA}	{NA}	{NA}	{NA}	{NA}	{NA}
A00577	{CONTIG11:698407:702027:+}	{gi|568449822|ref|XP_006459065.1|; hypothetical protein [Agaricus bisporus var. bisporus H97, AGABI2DRAFT_200998]}	{P47075; VTC4_YEAST Vacuolar transporter chaperone 4 OS=Saccharomyces cerevisiae (strain ATCC 204508 / S288c) GN=VTC4 PE=1 SV=2}	{abv:AGABI2DRAFT200998; }	{YJL012c; KOG1161 Protein involved in vacuolar polyphosphate accumulation, contains SPX domain P Inorganic ion transport and metabolism ;}	{GO:0016021; integral to membrane; cellular_component}	{NA}
A00578	{CONTIG11:705804:708136:-}	{gi|568449825|ref|XP_006459066.1|; hypothetical protein [Agaricus bisporus var. bisporus H97, AGABI2DRAFT_201001]}	{NA}	{abv:AGABI2DRAFT201001; }	{NA}	{NA}	{NA}
A00579	{CONTIG11:712398:713629:-}	{gi|597987735|ref|XP_007331423.1|; hypothetical protein [Agaricus bisporus var. burnettii JB137-S8, AGABI1DRAFT_101348]}	{NA}	{abp:AGABI1DRAFT101348; K21547 PRO1, NOSA C6 transcription factor Pro1 -- }	{NA}	{NA}	{NA}
A00580	{CONTIG11:716270:718372:+}	{gi|568445782|ref|XP_006457729.1|; hypothetical protein [Agaricus bisporus var. bisporus H97, AGABI2DRAFT_114773]}	{NA}	{abv:AGABI2DRAFT114773; }	{NA}	{GO:0003724; RNA helicase activity; molecular_function GO:0043531; ADP binding; molecular_function GO:0019079; viral genome replication; biological_process GO:0003723; RNA binding; molecular_function}	{NA}
A00581	{CONTIG11:720270:722162:-}	{gi|597987735|ref|XP_007331423.1|; hypothetical protein [Agaricus bisporus var. burnettii JB137-S8, AGABI1DRAFT_101348]}	{NA}	{abp:AGABI1DRAFT101348; K21547 PRO1, NOSA C6 transcription factor Pro1 -- }	{NA}	{NA}	{NA}
A00582	{CONTIG11:724077:725000:-}	{NA}	{NA}	{NA}	{NA}	{NA}	{NA}
A00583	{CONTIG11:736646:738743:-}	{gi|597987757|ref|XP_007331428.1|; hypothetical protein [Agaricus bisporus var. burnettii JB137-S8, AGABI1DRAFT_107828]}	{NA}	{abp:AGABI1DRAFT107828; }	{NA}	{GO:0005515; protein binding; molecular_function}	{NA}
A00584	{CONTIG11:744329:746482:+}	{gi|597987761|ref|XP_007331429.1|; hypothetical protein [Agaricus bisporus var. burnettii JB137-S8, AGABI1DRAFT_114921]}	{NA}	{abp:AGABI1DRAFT114921; }	{NA}	{GO:0055114; oxidation-reduction process; biological_process GO:0016614; oxidoreductase activity, acting on CH-OH group of donors; molecular_function GO:0050660; flavin adenine dinucleotide binding; molecular_function}	{NA}
A00585	{CONTIG11:748076:749976:+}	{gi|597987761|ref|XP_007331429.1|; hypothetical protein [Agaricus bisporus var. burnettii JB137-S8, AGABI1DRAFT_114921]}	{NA}	{abp:AGABI1DRAFT114921; }	{NA}	{GO:0055114; oxidation-reduction process; biological_process GO:0016614; oxidoreductase activity, acting on CH-OH group of donors; molecular_function GO:0050660; flavin adenine dinucleotide binding; molecular_function}	{NA}
A00586	{CONTIG11:750138:752544:-}	{gi|568449859|ref|XP_006459077.1|; hypothetical protein [Agaricus bisporus var. bisporus H97, AGABI2DRAFT_66116]}	{NA}	{abv:AGABI2DRAFT66116; }	{NA}	{GO:0017048; Rho GTPase binding; molecular_function GO:0003779; actin binding; molecular_function GO:0030036; actin cytoskeleton organization; biological_process}	{NA}
A00587	{CONTIG11:752804:754665:+}	{gi|597986805|ref|XP_007331191.1|; hypothetical protein [Agaricus bisporus var. burnettii JB137-S8, AGABI1DRAFT_42275]}	{NA}	{abp:AGABI1DRAFT42275; }	{NA}	{GO:0005515; protein binding; molecular_function GO:0016020; membrane; cellular_component GO:0004564; beta-fructofuranosidase activity; molecular_function GO:0019031; viral envelope; cellular_component GO:0004575; sucrose alpha-glucosidase activity; molecular_function GO:0005975; carbohydrate metabolic process; biological_process GO:0004553; hydrolase activity, hydrolyzing O-glycosyl compounds; m…	{CCA67070.1_GH17; {PIIN_00907;--;Piriformospora indica (Pirin1);--} glucan endo-1,3-&beta;-glucosidase (EC 3.2.1.39); glucan 1,3-&beta;-glucosidase (EC 3.2.1.58); licheninase (EC 3.2.1.73); ABA-specific &beta;-glucosidase (EC 3.2.1.175); &beta;-1,3-glucanosyltransglycosylase (EC 2.4.1.-) NA}
A00588	{CONTIG11:756966:757462:+}	{NA}	{NA}	{NA}	{NA}	{NA}	{NA}
A00589	{CONTIG11:758281:759566:+}	{gi|597987771|ref|XP_007331431.1|; hypothetical protein [Agaricus bisporus var. burnettii JB137-S8, AGABI1DRAFT_129873]}	{O74335; RGA5_SCHPO Rho-GTPase-activating protein 5 OS=Schizosaccharomyces pombe (strain 972 / ATCC 24843) GN=rga5 PE=4 SV=2}	{abp:AGABI1DRAFT129873; K19845 SAC7 GTPase-activating protein SAC7 -- Environmental Information Processing; Signal transduction; MAPK signaling pathway - yeast [PATH:ko04011] }	{SPBC17F3.01c; KOG2710 Rho GTPase-activating protein TZ Signal transduction mechanisms ; Cytoskeleton ;}	{GO:0007165; signal transduction; biological_process}	{NA}
A00590	{CONTIG11:762067:763802:-}	{gi|597987779|ref|XP_007331433.1|; hypothetical protein [Agaricus bisporus var. burnettii JB137-S8, AGABI1DRAFT_129875]}	{NA}	{abp:AGABI1DRAFT129875; }	{NA}	{GO:0003676; nucleic acid binding; molecular_function}	{NA}
A00591	{CONTIG11:763874:767177:+}	{gi|597987783|ref|XP_007331434.1|; hypothetical protein [Agaricus bisporus var. burnettii JB137-S8, AGABI1DRAFT_121724]}	{NA}	{abp:AGABI1DRAFT121724; K17583 NOM1 nucleolar MIF4G domain-containing protein 1 -- }	{NA}	{GO:0003723; RNA binding; molecular_function GO:0005515; protein binding; molecular_function}	{NA}
A00592	{CONTIG11:767203:768123:-}	{gi|597987089|ref|XP_007331262.1|; hypothetical protein [Agaricus bisporus var. burnettii JB137-S8, AGABI1DRAFT_76482]}	{Q9D853; MET10_MOUSE Protein-lysine N-methyltransferase Mettl10 OS=Mus musculus GN=Mettl10 PE=1 SV=1}	{abp:AGABI1DRAFT76482; }	{SPBC839.14c; KOG1271 Methyltransferases R General function prediction only ;}	{GO:0006400; tRNA modification; biological_process GO:0008152; NA GO:0008176; tRNA (guanine-N7-)-methyltransferase activity; molecular_function GO:0008168; methyltransferase activity; molecular_function}	{NA}
A00593	{CONTIG11:768389:768766:-}	{gi|568449883|ref|XP_006459085.1|; hypothetical protein [Agaricus bisporus]}	{Q759D2; TIM14_ASHGO Mitochondrial import inner membrane translocase subunit TIM14 OS=Ashbya gossypii (strain ATCC 10895 / CBS 109.51 / FGSC 9923 / NRRL Y-1056) GN=PAM18 PE=3 SV=1}	{abp:AGABI1DRAFT114927; K09539 DNAJC19 DnaJ homolog subfamily C member 19 -- }	{SPAC824.06; KOG0723 Molecular chaperone (DnaJ superfamily) O Posttranslational modification, protein turnover, chaperones ;}	{GO:0055114; oxidation-reduction process; biological_process GO:0020037; heme binding; molecular_function GO:0004601; peroxidase activity; molecular_function}	{NA}
A00594	{CONTIG11:769356:772065:+}	{gi|403414691|emb|CCM01391.1|; predicted protein [Fibroporia radiculosa]}	{NA}	{cci:CC1G_06290; K14326 UPF1, RENT1 regulator of nonsense transcripts 1 3.6.4.- Genetic Information Processing; Translation; RNA transport [PATH:ko03013] Genetic Information Processing; Translation; mRNA surveillance pathway [PATH:ko03015] }	{NA}	{GO:0008026; ATP-dependent helicase activity; molecular_function GO:0016787; hydrolase activity; molecular_function GO:0005524; ATP binding; molecular_function GO:0043531; ADP binding; molecular_function GO:0003677; DNA binding; molecular_function GO:0006810; transport; biological_process GO:0003676; nucleic acid binding; molecular_function}	{NA}
A00595	{CONTIG11:772517:775276:-}	{gi|597987829|ref|XP_007331445.1|; hypothetical protein [Agaricus bisporus var. burnettii JB137-S8, AGABI1DRAFT_86289]}	{O94342; YHM9_SCHPO Probable metabolite transport protein C1271.09 OS=Schizosaccharomyces pombe (strain 972 / ATCC 24843) GN=SPBC1271.09 PE=3 SV=1}	{abp:AGABI1DRAFT86289; }	{SPBC1271.09; KOG0252 Inorganic phosphate transporter P Inorganic ion transport and metabolism ;}	{GO:0022857; transmembrane transporter activity; molecular_function GO:0055085; transmembrane transport; biological_process GO:0016021; integral to membrane; cellular_component}	{NA}
A00596	{CONTIG11:776005:778825:+}	{gi|568449889|ref|XP_006459087.1|; hypothetical protein [Agaricus bisporus var. bisporus H97, AGABI2DRAFT_201026]}	{NA}	{abv:AGABI2DRAFT201026; K14326 UPF1, RENT1 regulator of nonsense transcripts 1 3.6.4.- Genetic Information Processing; Translation; RNA transport [PATH:ko03013] Genetic Information Processing; Translation; mRNA surveillance pathway [PATH:ko03015] }	{NA}	{GO:0005524; ATP binding; molecular_function GO:0016787; hydrolase activity; molecular_function GO:0003677; DNA binding; molecular_function}	{NA}
A00597	{CONTIG11:779019:781332:-}	{gi|597987093|ref|XP_007331263.1|; hypothetical protein [Agaricus bisporus var. burnettii JB137-S8, AGABI1DRAFT_76491]}	{NA}	{abp:AGABI1DRAFT76491; K00624 E2.3.1.7 carnitine O-acetyltransferase 2.3.1.7 Cellular Processes; Transport and catabolism; Peroxisome [PATH:ko04146] }	{NA}	{GO:0016746; transferase activity, transferring acyl groups; molecular_function}	{NA}
A00598	{CONTIG11:781375:783448:+}	{gi|597987791|ref|XP_007331436.1|; hypothetical protein [Agaricus bisporus var. burnettii JB137-S8, AGABI1DRAFT_107841]}	{NA}	{abp:AGABI1DRAFT107841; K10990 RMI1, BRAP75 RecQ-mediated genome instability protein 1 -- Genetic Information Processing; Replication and repair; Fanconi anemia pathway [PATH:ko03460] }	{NA}	{NA}	{NA}
A00599	{CONTIG11:783926:784876:-}	{gi|568449898|ref|XP_006459090.1|; hypothetical protein [Agaricus bisporus var. bisporus H97, AGABI2DRAFT_66229]}	{O74746; SPF31_SCHPO J domain-containing protein spf31 OS=Schizosaccharomyces pombe (strain 972 / ATCC 24843) GN=spf31 PE=4 SV=1}	{abv:AGABI2DRAFT66229; K09528 DNAJC8 DnaJ homolog subfamily C member 8 -- }	{SPBC1734.05c; KOG1150 Predicted molecular chaperone (DnaJ superfamily) O Posttranslational modification, protein turnover, chaperones ;}	{NA}	{NA}
A00600	{CONTIG11:785323:786055:+}	{gi|597986817|ref|XP_007331194.1|; hypothetical protein AGABI1DRAFT_42311, partial [Agaricus bisporus var. burnettii JB137-S8]}	{P19516; COX11_YEAST Cytochrome c oxidase assembly protein COX11, mitochondrial OS=Saccharomyces cerevisiae (strain ATCC 204508 / S288c) GN=COX11 PE=3 SV=2}	{abp:AGABI1DRAFT42311; K02258 COX11 cytochrome c oxidase assembly protein subunit 11 -- Metabolism; Energy metabolism; Oxidative phosphorylation [PATH:ko00190] }	{YPL132w; KOG2540 Cytochrome oxidase assembly factor COX11 O Posttranslational modification, protein turnover, chaperones ;}	{GO:0005507; copper ion binding; molecular_function}	{NA}
A00601	{CONTIG11:786769:790445:-}	{gi|568449910|ref|XP_006459094.1|; hypothetical protein [Agaricus bisporus var. bisporus H97, AGABI2DRAFT_217997]}	{NA}	{abv:AGABI2DRAFT217997; K10846 ERCC5, XPG, RAD2 DNA excision repair protein ERCC-5 -- Genetic Information Processing; Replication and repair; Nucleotide excision repair [PATH:ko03420] }	{NA}	{GO:0004518; nuclease activity; molecular_function GO:0006281; DNA repair; biological_process GO:0003824; NA GO:0003677; DNA binding; molecular_function}	{NA}
A00602	{CONTIG11:791328:796483:-}	{gi|568449919|ref|XP_006459097.1|; hypothetical protein [Agaricus bisporus var. bisporus H97, AGABI2DRAFT_183881]}	{NA}	{abv:AGABI2DRAFT183881; K12609 CAF120 CCR4-NOT transcriptional complex subunit CAF120 -- Genetic Information Processing; Folding, sorting and degradation; RNA degradation [PATH:ko03018] }	{NA}	{GO:0005634; nucleus; cellular_component GO:0000775; chromosome, centromeric region; cellular_component GO:0006355; regulation of transcription, DNA-dependent; biological_process GO:0003677; DNA binding; molecular_function GO:0003682; chromatin binding; molecular_function}	{NA}
A00603	{CONTIG11:797355:799292:+}	{gi|597987807|ref|XP_007331440.1|; hypothetical protein [Agaricus bisporus var. burnettii JB137-S8, AGABI1DRAFT_129890]}	{NA}	{abp:AGABI1DRAFT129890; }	{NA}	{GO:0009452; RNA capping; biological_process GO:0008176; tRNA (guanine-N7-)-methyltransferase activity; molecular_function GO:0008171; O-methyltransferase activity; molecular_function GO:0008168; methyltransferase activity; molecular_function GO:0008152; NA GO:0032259; methylation; biological_process GO:0006400; tRNA modification; biological_process GO:0001510; RNA methylation; biological_process}	{NA}
A00604	{CONTIG11:799620:801406:+}	{gi|597987813|ref|XP_007331441.1|; hypothetical protein [Agaricus bisporus var. burnettii JB137-S8, AGABI1DRAFT_114934]}	{Q6AYD3; PA2G4_RAT Proliferation-associated protein 2G4 OS=Rattus norvegicus GN=Pa2g4 PE=1 SV=1}	{abp:AGABI1DRAFT114934; }	{Hs5453842; KOG2776 Metallopeptidase R General function prediction only ;}	{NA}	{NA}
A00605	{CONTIG11:807853:810603:+}	{gi|568449937|ref|XP_006459103.1|; hypothetical protein [Agaricus bisporus var. bisporus H97, AGABI2DRAFT_191164]}	{O94342; YHM9_SCHPO Probable metabolite transport protein C1271.09 OS=Schizosaccharomyces pombe (strain 972 / ATCC 24843) GN=SPBC1271.09 PE=3 SV=1}	{abv:AGABI2DRAFT191164; }	{SPBC1271.09; KOG0252 Inorganic phosphate transporter P Inorganic ion transport and metabolism ;}	{GO:0055085; transmembrane transport; biological_process GO:0022857; transmembrane transporter activity; molecular_function GO:0016021; integral to membrane; cellular_component}	{NA}
A00606	{CONTIG11:812057:813005:-}	{gi|568461337|ref|XP_006462890.1|; hypothetical protein [Agaricus bisporus var. bisporus H97, AGABI2DRAFT_193963]}	{NA}	{abv:AGABI2DRAFT193963; }	{NA}	{NA}	{NA}
A00607	{CONTIG11:813359:815809:+}	{gi|568449937|ref|XP_006459103.1|; hypothetical protein [Agaricus bisporus var. bisporus H97, AGABI2DRAFT_191164]}	{O94342; YHM9_SCHPO Probable metabolite transport protein C1271.09 OS=Schizosaccharomyces pombe (strain 972 / ATCC 24843) GN=SPBC1271.09 PE=3 SV=1}	{abv:AGABI2DRAFT191164; }	{SPBC1271.09; KOG0252 Inorganic phosphate transporter P Inorganic ion transport and metabolism ;}	{GO:0022857; transmembrane transporter activity; molecular_function GO:0055085; transmembrane transport; biological_process GO:0016021; integral to membrane; cellular_component}	{NA}
A00608	{CONTIG11:816900:819649:+}	{gi|568449937|ref|XP_006459103.1|; hypothetical protein [Agaricus bisporus var. bisporus H97, AGABI2DRAFT_191164]}	{O94342; YHM9_SCHPO Probable metabolite transport protein C1271.09 OS=Schizosaccharomyces pombe (strain 972 / ATCC 24843) GN=SPBC1271.09 PE=3 SV=1}	{abv:AGABI2DRAFT191164; }	{SPBC1271.09; KOG0252 Inorganic phosphate transporter P Inorganic ion transport and metabolism ;}	{GO:0055085; transmembrane transport; biological_process GO:0022857; transmembrane transporter activity; molecular_function GO:0016021; integral to membrane; cellular_component}	{NA}
A00609	{CONTIG11:820986:822167:-}	{gi|568438172|ref|XP_006455196.1|; hypothetical protein [Agaricus bisporus var. bisporus H97, AGABI2DRAFT_209572]}	{NA}	{abv:AGABI2DRAFT209572; }	{NA}	{GO:0016887; ATPase activity; molecular_function GO:0005524; ATP binding; molecular_function}	{NA}
A00610	{CONTIG11:825513:825967:-}	{NA}	{NA}	{NA}	{NA}	{GO:0003677; DNA binding; molecular_function GO:0042025; host cell nucleus; cellular_component}	{NA}
A00611	{CONTIG11:827426:828315:-}	{gi|597984341|ref|XP_007330594.1|; hypothetical protein [Agaricus bisporus var. burnettii JB137-S8, AGABI1DRAFT_114384]}	{NA}	{abp:AGABI1DRAFT114384; }	{NA}	{NA}	{NA}
A00612	{CONTIG11:829272:831138:+}	{gi|597984337|ref|XP_007330593.1|; hypothetical protein [Agaricus bisporus var. burnettii JB137-S8, AGABI1DRAFT_129072]}	{O23254; GLYC4_ARATH Serine hydroxymethyltransferase 4 OS=Arabidopsis thaliana GN=SHM4 PE=1 SV=1}	{abp:AGABI1DRAFT129072; K00600 glyA, SHMT glycine hydroxymethyltransferase 2.1.2.1 Metabolism; Amino acid metabolism; Glycine, serine and threonine metabolism [PATH:ko00260] Metabolism; Metabolism of other amino acids; Cyanoamino acid metabolism [PATH:ko00460] Metabolism; Carbohydrate metabolism; Glyoxylate and dicarboxylate metabolism [PATH:ko00630] Metabolism; Metabolism of cofactors and vitami…	{At4g13930; KOG2467 Glycine/serine hydroxymethyltransferase E Amino acid transport and metabolism ;}	{GO:0006544; glycine metabolic process; biological_process GO:0004372; glycine hydroxymethyltransferase activity; molecular_function GO:0006563; L-serine metabolic process; biological_process}	{NA}
A00613	{CONTIG11:838908:840885:+}	{gi|597984337|ref|XP_007330593.1|; hypothetical protein [Agaricus bisporus var. burnettii JB137-S8, AGABI1DRAFT_129072]}	{O23254; GLYC4_ARATH Serine hydroxymethyltransferase 4 OS=Arabidopsis thaliana GN=SHM4 PE=1 SV=1}	{abp:AGABI1DRAFT129072; K00600 glyA, SHMT glycine hydroxymethyltransferase 2.1.2.1 Metabolism; Amino acid metabolism; Glycine, serine and threonine metabolism [PATH:ko00260] Metabolism; Metabolism of other amino acids; Cyanoamino acid metabolism [PATH:ko00460] Metabolism; Carbohydrate metabolism; Glyoxylate and dicarboxylate metabolism [PATH:ko00630] Metabolism; Metabolism of cofactors and vitami…	{At4g13930; KOG2467 Glycine/serine hydroxymethyltransferase E Amino acid transport and metabolism ;}	{GO:0006563; L-serine metabolic process; biological_process GO:0006544; glycine metabolic process; biological_process GO:0004372; glycine hydroxymethyltransferase activity; molecular_function}	{NA}
A00614	{CONTIG11:842727:845705:-}	{gi|568450931|ref|XP_006459434.1|; hypothetical protein [Agaricus bisporus var. bisporus H97, AGABI2DRAFT_184129]}	{NA}	{abv:AGABI2DRAFT184129; K19347 SUN1_2 SUN domain-containing protein 1/2 -- }	{NA}	{NA}	{NA}
A00615	{CONTIG11:845845:847475:-}	{gi|568450838|ref|XP_006459404.1|; hypothetical protein [Agaricus bisporus var. bisporus H97, AGABI2DRAFT_177361]}	{NA}	{abv:AGABI2DRAFT177361; }	{NA}	{NA}	{NA}
A00616	{CONTIG11:851805:854155:+}	{gi|597983467|ref|XP_007330378.1|; hypothetical protein [Agaricus bisporus var. burnettii JB137-S8, AGABI1DRAFT_59874]}	{Q8T154; UCKB_DICDI Uridine-cytidine kinase B OS=Dictyostelium discoideum GN=udkB PE=3 SV=2}	{abp:AGABI1DRAFT59874; K00876 udk, UCK uridine kinase 2.7.1.48 Metabolism; Nucleotide metabolism; Pyrimidine metabolism [PATH:ko00240] Metabolism; Xenobiotics biodegradation and metabolism; Drug metabolism - other enzymes [PATH:ko00983] }	{NA}	{GO:0006139; nucleobase, nucleoside, nucleotide and nucleic acid metabolic process; biological_process GO:0015937; coenzyme A biosynthetic process; biological_process GO:0008152; NA GO:0005524; ATP binding; molecular_function GO:0004140; dephospho-CoA kinase activity; molecular_function GO:0016301; kinase activity; molecular_function GO:0016773; phosphotransferase activity, alcohol group as accep…	{NA}
A00617	{CONTIG11:855348:856759:-}	{gi|568450916|ref|XP_006459429.1|; hypothetical protein [Agaricus bisporus var. bisporus H97, AGABI2DRAFT_191406]}	{NA}	{abv:AGABI2DRAFT191406; }	{NA}	{GO:0005524; ATP binding; molecular_function}	{NA}
A00618	{CONTIG11:856983:858666:+}	{gi|568450904|ref|XP_006459425.1|; hypothetical protein [Agaricus bisporus var. bisporus H97, AGABI2DRAFT_191400]}	{NA}	{abv:AGABI2DRAFT191400; }	{NA}	{GO:0005525; GTP binding; molecular_function GO:0015093; ferrous iron transmembrane transporter activity; molecular_function GO:0015684; ferrous iron transport; biological_process GO:0016021; integral to membrane; cellular_component GO:0016887; ATPase activity; molecular_function GO:0003924; GTPase activity; molecular_function GO:0005524; ATP binding; molecular_function}	{NA}
A00619	{CONTIG11:859399:860337:-}	{gi|568450901|ref|XP_006459424.1|; hypothetical protein [Agaricus bisporus var. bisporus H97, AGABI2DRAFT_141962]}	{NA}	{abv:AGABI2DRAFT141962; }	{NA}	{GO:0019001; guanyl nucleotide binding; molecular_function GO:0015743; malate transport; biological_process GO:0031683; G-protein beta/gamma-subunit complex binding; molecular_function GO:0003924; GTPase activity; molecular_function GO:0007186; G-protein coupled receptor protein signaling pathway; biological_process GO:0004871; signal transducer activity; molecular_function}	{NA}
A00620	{CONTIG11:861459:862578:+}	{gi|597984313|ref|XP_007330587.1|; hypothetical protein [Agaricus bisporus var. burnettii JB137-S8, AGABI1DRAFT_114375]}	{NA}	{abp:AGABI1DRAFT114375; }	{NA}	{GO:0016592; mediator complex; cellular_component GO:0003924; GTPase activity; molecular_function GO:0048255; mRNA stabilization; biological_process GO:0001104; RNA polymerase II transcription cofactor activity; molecular_function GO:0006357; regulation of transcription from RNA polymerase II promoter; biological_process GO:0005525; GTP binding; molecular_function}	{NA}
A00621	{CONTIG11:864681:867493:+}	{gi|568450892|ref|XP_006459421.1|; hypothetical protein [Agaricus bisporus var. bisporus H97, AGABI2DRAFT_116397]}	{NA}	{abv:AGABI2DRAFT116397; }	{NA}	{GO:0005737; cytoplasm; cellular_component GO:0016817; hydrolase activity, acting on acid anhydrides; molecular_function GO:0043531; ADP binding; molecular_function GO:0070526; threonylcarbamoyladenosine biosynthetic process; biological_process GO:0005525; GTP binding; molecular_function GO:0003924; GTPase activity; molecular_function GO:0005634; nucleus; cellular_component GO:0016887; ATPase act…	{NA}
A00622	{CONTIG11:869536:875742:+}	{gi|568450886|ref|XP_006459419.1|; hypothetical protein [Agaricus bisporus var. bisporus H97, AGABI2DRAFT_218609]}	{NA}	{abv:AGABI2DRAFT191394; }	{NA}	{GO:0003924; GTPase activity; molecular_function GO:0005524; ATP binding; molecular_function GO:0016020; membrane; cellular_component GO:0043161; proteasomal ubiquitin-dependent protein catabolic process; biological_process GO:0004672; protein kinase activity; molecular_function GO:0005525; GTP binding; molecular_function GO:0016773; phosphotransferase activity, alcohol group as acceptor; molecul…	{NA}
A00623	{CONTIG11:876486:879799:+}	{gi|597984277|ref|XP_007330578.1|; hypothetical protein [Agaricus bisporus var. burnettii JB137-S8, AGABI1DRAFT_100798]}	{NA}	{abp:AGABI1DRAFT100798; }	{NA}	{GO:0005524; ATP binding; molecular_function GO:0004197; cysteine-type endopeptidase activity; molecular_function GO:0006508; proteolysis; biological_process GO:0004672; protein kinase activity; molecular_function GO:0006468; protein phosphorylation; biological_process}	{NA}
A00624	{CONTIG11:881308:882985:+}	{gi|597984289|ref|XP_007330581.1|; hypothetical protein [Agaricus bisporus var. burnettii JB137-S8, AGABI1DRAFT_114368]}	{NA}	{abp:AGABI1DRAFT114368; }	{NA}	{GO:0016787; hydrolase activity; molecular_function}	{NA}
A00625	{CONTIG11:884156:886370:-}	{gi|597990767|ref|XP_007332152.1|; hypothetical protein [Agaricus bisporus var. burnettii JB137-S8, AGABI1DRAFT_130570]}	{NA}	{abp:AGABI1DRAFT130570; }	{NA}	{GO:0003724; RNA helicase activity; molecular_function GO:0098519; NA GO:0003723; RNA binding; molecular_function GO:0005524; ATP binding; molecular_function}	{NA}
A00626	{CONTIG11:887629:890031:-}	{gi|597990767|ref|XP_007332152.1|; hypothetical protein [Agaricus bisporus var. burnettii JB137-S8, AGABI1DRAFT_130570]}	{NA}	{abp:AGABI1DRAFT130570; }	{NA}	{GO:0005524; ATP binding; molecular_function GO:0016887; ATPase activity; molecular_function GO:0003723; RNA binding; molecular_function GO:0098519; NA GO:0003724; RNA helicase activity; molecular_function}	{NA}
A00627	{CONTIG11:890867:891950:-}	{gi|597984281|ref|XP_007330579.1|; hypothetical protein [Agaricus bisporus var. burnettii JB137-S8, AGABI1DRAFT_92339]}	{A7F075; MCA1_SCLS1 Metacaspase-1 OS=Sclerotinia sclerotiorum (strain ATCC 18683 / 1980 / Ss-1) GN=casA PE=3 SV=1}	{abp:AGABI1DRAFT92339; }	{At5g64240; KOG1546 Metacaspase involved in regulation of apoptosis DO Cell cycle control, cell division, chromosome partitioning ; Posttranslational modification, protein turnover, chaperones ;}	{GO:0006508; proteolysis; biological_process GO:0004197; cysteine-type endopeptidase activity; molecular_function}	{NA}
A00628	{CONTIG11:893384:895902:-}	{gi|597984277|ref|XP_007330578.1|; hypothetical protein [Agaricus bisporus var. burnettii JB137-S8, AGABI1DRAFT_100798]}	{P0CM59; MCA1_CRYNB Metacaspase-1 OS=Cryptococcus neoformans var. neoformans serotype D (strain B-3501A) GN=MCA1 PE=3 SV=1}	{abp:AGABI1DRAFT100798; }	{SPCC1840.04; KOG1546 Metacaspase involved in regulation of apoptosis DO Cell cycle control, cell division, chromosome partitioning ; Posttranslational modification, protein turnover, chaperones ;}	{GO:0006508; proteolysis; biological_process GO:0004197; cysteine-type endopeptidase activity; molecular_function}	{NA}
A00629	{CONTIG11:896265:899323:+}	{gi|568450830|ref|XP_006459401.1|; hypothetical protein [Agaricus bisporus var. bisporus H97, AGABI2DRAFT_141940]}	{NA}	{abv:AGABI2DRAFT141940; }	{NA}	{GO:0016021; integral to membrane; cellular_component GO:0055085; transmembrane transport; biological_process GO:0022857; transmembrane transporter activity; molecular_function}	{NA}
A00630	{CONTIG11:899573:900183:+}	{gi|597984269|ref|XP_007330576.1|; COX5B subunit VB of cytochrome c oxidase [Agaricus bisporus var. burnettii JB137-S8]}	{P04037; COX4_YEAST Cytochrome c oxidase subunit 4, mitochondrial OS=Saccharomyces cerevisiae (strain ATCC 204508 / S288c) GN=COX4 PE=1 SV=1}	{abp:AGABI1DRAFT114365; K02265 COX5B cytochrome c oxidase subunit 5b -- Metabolism; Energy metabolism; Oxidative phosphorylation [PATH:ko00190] Organismal Systems; Circulatory system; Cardiac muscle contraction [PATH:ko04260] Human Diseases; Endocrine and metabolic diseases; Non-alcoholic fatty liver disease (NAFLD) [PATH:ko04932] Human Diseases; Neurodegenerative diseases; Alzheimer's disease [P…	{YGL187c; KOG3352 Cytochrome c oxidase, subunit Vb/COX4 C Energy production and conversion ;}	{GO:0004129; cytochrome-c oxidase activity; molecular_function GO:0005740; mitochondrial envelope; cellular_component}	{NA}
A00631	{CONTIG11:901582:903585:+}	{gi|597984265|ref|XP_007330575.1|; hypothetical protein [Agaricus bisporus var. burnettii JB137-S8, AGABI1DRAFT_114364]}	{NA}	{abp:AGABI1DRAFT114364; }	{NA}	{NA}	{NA}
A00632	{CONTIG11:904486:906863:+}	{gi|597983463|ref|XP_007330377.1|; hypothetical protein [Agaricus bisporus var. burnettii JB137-S8, AGABI1DRAFT_59835]}	{NA}	{abp:AGABI1DRAFT59835; }	{NA}	{GO:0016853; isomerase activity; molecular_function}	{NA}
A00633	{CONTIG11:907346:908801:-}	{NA}	{NA}	{NA}	{NA}	{NA}	{NA}
A00634	{CONTIG11:910070:910769:-}	{gi|597984257|ref|XP_007330573.1|; hypothetical protein [Agaricus bisporus var. burnettii JB137-S8, AGABI1DRAFT_114362]}	{NA}	{abp:AGABI1DRAFT114362; }	{NA}	{GO:0016020; membrane; cellular_component}	{NA}
A00635	{CONTIG11:910867:913876:-}	{gi|597984253|ref|XP_007330572.1|; hypothetical protein [Agaricus bisporus var. burnettii JB137-S8, AGABI1DRAFT_114361]}	{NA}	{abp:AGABI1DRAFT114361; K07119 K07119 uncharacterized protein -- }	{NA}	{GO:0006810; transport; biological_process GO:0055114; oxidation-reduction process; biological_process GO:0005215; NA GO:0008270; zinc ion binding; molecular_function GO:0016491; oxidoreductase activity; molecular_function GO:0016020; membrane; cellular_component}	{NA}
A00636	{CONTIG11:916259:917617:-}	{gi|568450805|ref|XP_006459393.1|; hypothetical protein [Agaricus bisporus var. bisporus H97, AGABI2DRAFT_218565]}	{NA}	{abv:AGABI2DRAFT218565; }	{NA}	{GO:0016020; membrane; cellular_component GO:0005215; NA GO:0006810; transport; biological_process}	{NA}
A00637	{CONTIG11:921473:921838:-}	{gi|597984241|ref|XP_007330569.1|; N19M, NADH-ubiquinone oxidoreductase 9. 5 kDa subunit [Agaricus bisporus var. burnettii JB137-S8]}	{NA}	{abp:AGABI1DRAFT85667; }	{NA}	{NA}	{NA}
A00638	{CONTIG11:921950:924818:+}	{gi|597983607|ref|XP_007330413.1|; hypothetical protein [Agaricus bisporus var. burnettii JB137-S8, AGABI1DRAFT_75236]}	{NA}	{abp:AGABI1DRAFT75236; K11984 SART1, HAF, SNU66 U4/U6.U5 tri-snRNP-associated protein 1 -- Genetic Information Processing; Transcription; Spliceosome [PATH:ko03040] }	{NA}	{GO:0004814; arginine-tRNA ligase activity; molecular_function GO:0005524; ATP binding; molecular_function GO:0006420; arginyl-tRNA aminoacylation; biological_process GO:0000166; nucleotide binding; molecular_function GO:0005737; cytoplasm; cellular_component}	{NA}
A00639	{CONTIG11:924911:926095:-}	{gi|568450796|ref|XP_006459390.1|; hypothetical protein [Agaricus bisporus var. bisporus H97, AGABI2DRAFT_149543]}	{Q5U209; RNH2A_RAT Ribonuclease H2 subunit A OS=Rattus norvegicus GN=Rnaseh2a PE=2 SV=1}	{abv:AGABI2DRAFT149543; K10743 RNASEH2A ribonuclease H2 subunit A 3.1.26.4 Genetic Information Processing; Replication and repair; DNA replication [PATH:ko03030] }	{Hs5454010; KOG2299 Ribonuclease HI L Replication, recombination and repair ;}	{NA}	{NA}
A00640	{CONTIG11:933079:935001:-}	{NA}	{NA}	{NA}	{NA}	{NA}	{NA}
A00641	{CONTIG11:935913:939184:+}	{NA}	{NA}	{NA}	{NA}	{GO:0005524; ATP binding; molecular_function GO:0006468; protein phosphorylation; biological_process GO:0004672; protein kinase activity; molecular_function}	{NA}
A00642	{CONTIG11:940480:942192:-}	{gi|597983603|ref|XP_007330412.1|; hypothetical protein AGABI1DRAFT_75231, partial [Agaricus bisporus var. burnettii JB137-S8]}	{P29717; EXG1_CANAL Glucan 1,3-beta-glucosidase OS=Candida albicans (strain SC5314 / ATCC MYA-2876) GN=XOG1 PE=1 SV=5}	{abp:AGABI1DRAFT75231; }	{NA}	{GO:0004553; hydrolase activity, hydrolyzing O-glycosyl compounds; molecular_function GO:0005975; carbohydrate metabolic process; biological_process}	{CCA71432.1_GH5; {PIIN_05371;--;Piriformospora indica (Pirin1);--} endo-&beta;-1,4-glucanase / cellulase (EC 3.2.1.4); endo-&beta;-1,4-xylanase (EC 3.2.1.8); &beta;-glucosidase (EC 3.2.1.21); &beta;-mannosidase (EC 3.2.1.25); &beta;-glucosylceramidase (EC 3.2.1.45); glucan &beta;-1,3-glucosidase (EC 3.2.1.58); licheninase (EC 3.2.1.73); exo-&beta;-1,4-glucanase / cellodextrinase (EC 3.2.1.74); gl…
A00643	{CONTIG11:942300:943287:+}	{NA}	{NA}	{NA}	{NA}	{GO:0003677; DNA binding; molecular_function GO:0005634; nucleus; cellular_component GO:0006355; regulation of transcription, DNA-dependent; biological_process}	{NA}
A00644	{CONTIG11:943779:945263:-}	{gi|597984223|ref|XP_007330565.1|; hypothetical protein [Agaricus bisporus var. burnettii JB137-S8, AGABI1DRAFT_114353]}	{NA}	{abp:AGABI1DRAFT114353; }	{NA}	{GO:0005515; protein binding; molecular_function}	{NA}
A00645	{CONTIG11:945686:947479:+}	{gi|597984219|ref|XP_007330564.1|; hypothetical protein [Agaricus bisporus var. burnettii JB137-S8, AGABI1DRAFT_114352]}	{NA}	{abp:AGABI1DRAFT114352; K09584 PDIA6, TXNDC7 protein disulfide-isomerase A6 5.3.4.1 Genetic Information Processing; Folding, sorting and degradation; Protein processing in endoplasmic reticulum [PATH:ko04141] }	{NA}	{GO:0009306; protein secretion; biological_process GO:0005788; endoplasmic reticulum lumen; cellular_component GO:0005783; endoplasmic reticulum; cellular_component GO:0045454; cell redox homeostasis; biological_process}	{NA}
A00646	{CONTIG11:953965:955464:-}	{gi|597984201|ref|XP_007330560.1|; hypothetical protein [Agaricus bisporus var. burnettii JB137-S8, AGABI1DRAFT_107238]}	{NA}	{abp:AGABI1DRAFT107238; }	{NA}	{GO:0003824; NA GO:0055114; oxidation-reduction process; biological_process GO:0044237; cellular metabolic process; biological_process GO:0016616; oxidoreductase activity, acting on the CH-OH group of donors, NAD or NADP as acceptor; molecular_function GO:0050662; coenzyme binding; molecular_function GO:0006694; steroid biosynthetic process; biological_process GO:0003854; 3-beta-hydroxy-delta5-st…	{NA}
A00647	{CONTIG11:957200:958690:-}	{gi|597984201|ref|XP_007330560.1|; hypothetical protein [Agaricus bisporus var. burnettii JB137-S8, AGABI1DRAFT_107238]}	{NA}	{abp:AGABI1DRAFT107238; }	{NA}	{GO:0016616; oxidoreductase activity, acting on the CH-OH group of donors, NAD or NADP as acceptor; molecular_function GO:0050662; coenzyme binding; molecular_function GO:0006694; steroid biosynthetic process; biological_process GO:0003854; 3-beta-hydroxy-delta5-steroid dehydrogenase activity; molecular_function GO:0003824; NA GO:0055114; oxidation-reduction process; biological_process GO:0044237…	{NA}
A00648	{CONTIG11:959843:961430:-}	{gi|597984201|ref|XP_007330560.1|; hypothetical protein [Agaricus bisporus var. burnettii JB137-S8, AGABI1DRAFT_107238]}	{NA}	{abp:AGABI1DRAFT107238; }	{NA}	{GO:0044237; cellular metabolic process; biological_process GO:0055114; oxidation-reduction process; biological_process GO:0003824; NA GO:0003854; 3-beta-hydroxy-delta5-steroid dehydrogenase activity; molecular_function GO:0050662; coenzyme binding; molecular_function GO:0006694; steroid biosynthetic process; biological_process GO:0016616; oxidoreductase activity, acting on the CH-OH group of don…	{NA}
A00649	{CONTIG11:962607:964129:-}	{gi|597984201|ref|XP_007330560.1|; hypothetical protein [Agaricus bisporus var. burnettii JB137-S8, AGABI1DRAFT_107238]}	{NA}	{abp:AGABI1DRAFT107238; }	{NA}	{GO:0003824; NA GO:0055114; oxidation-reduction process; biological_process GO:0044237; cellular metabolic process; biological_process GO:0016616; oxidoreductase activity, acting on the CH-OH group of donors, NAD or NADP as acceptor; molecular_function GO:0050662; coenzyme binding; molecular_function GO:0006694; steroid biosynthetic process; biological_process GO:0003854; 3-beta-hydroxy-delta5-st…	{NA}
A00650	{CONTIG11:966533:968113:-}	{gi|568450762|ref|XP_006459378.1|; hypothetical protein [Agaricus bisporus var. bisporus H97, AGABI2DRAFT_191370]}	{NA}	{abv:AGABI2DRAFT191370; }	{NA}	{NA}	{NA}
A00651	{CONTIG11:968353:969997:+}	{gi|597983229|ref|XP_007330319.1|; hypothetical protein [Agaricus bisporus var. burnettii JB137-S8, AGABI1DRAFT_40758]}	{P42824; DNJH2_ALLPO DnaJ protein homolog 2 OS=Allium porrum GN=LDJ2 PE=2 SV=1}	{abp:AGABI1DRAFT40758; K14002 SCJ1 DnaJ-related protein SCJ1 -- Genetic Information Processing; Folding, sorting and degradation; Protein processing in endoplasmic reticulum [PATH:ko04141] }	{At3g44110; KOG0712 Molecular chaperone (DnaJ superfamily) O Posttranslational modification, protein turnover, chaperones ;}	{GO:0016151; nickel ion binding; molecular_function GO:0006464; protein modification process; biological_process GO:0051082; unfolded protein binding; molecular_function GO:0031072; heat shock protein binding; molecular_function}	{NA}
A00652	{CONTIG11:971293:972202:+}	{gi|568450756|ref|XP_006459376.1|; hypothetical protein [Agaricus bisporus]}	{NA}	{abp:AGABI1DRAFT75209; }	{NA}	{NA}	{NA}
A00653	{CONTIG11:972548:979763:-}	{gi|691783897|emb|CDO78180.1|; hypothetical protein [Trametes cinnabarina, BN946_scf184797.g6]}	{B0DAD3; XPOT_LACBS Exportin-T OS=Laccaria bicolor (strain S238N-H82 / ATCC MYA-4686) GN=LOS1 PE=3 SV=1}	{abp:AGABI1DRAFT121171; K14288 XPOT exportin-T -- Genetic Information Processing; Translation; RNA transport [PATH:ko03013] }	{NA}	{GO:0016020; membrane; cellular_component GO:0031461; cullin-RING ubiquitin ligase complex; cellular_component GO:0017038; protein import; biological_process GO:0031625; ubiquitin protein ligase binding; molecular_function GO:0006511; ubiquitin-dependent protein catabolic process; biological_process}	{NA}
A00654	{CONTIG11:980013:983341:+}	{gi|299749744|ref|XP_001836303.2|; thiamine pyrophosphokinase [Coprinopsis cinerea okayama7#130]}	{NA}	{cci:CC1G_06388; K00949 thiN, TPK1, THI80 thiamine pyrophosphokinase 2.7.6.2 Metabolism; Metabolism of cofactors and vitamins; Thiamine metabolism [PATH:ko00730] }	{NA}	{GO:0005524; ATP binding; molecular_function GO:0004788; thiamine diphosphokinase activity; molecular_function GO:0009229; thiamine diphosphate biosynthetic process; biological_process}	{NA}
A00655	{CONTIG11:984910:986181:-}	{gi|568450738|ref|XP_006459370.1|; hypothetical protein [Agaricus bisporus var. bisporus H97, AGABI2DRAFT_184086]}	{NA}	{abv:AGABI2DRAFT184086; }	{NA}	{GO:0016790; thiolester hydrolase activity; molecular_function}	{NA}
A00656	{CONTIG11:986478:987782:+}	{gi|568450735|ref|XP_006459369.1|; hypothetical protein [Agaricus bisporus var. bisporus H97, AGABI2DRAFT_191362]}	{NA}	{abv:AGABI2DRAFT191362; K11676 IES2 Ino eighty subunit 2 -- }	{NA}	{GO:0031011; Ino80 complex; cellular_component}	{NA}
A00657	{CONTIG11:988003:989273:-}	{gi|170110612|ref|XP_001886511.1|; predicted protein [Laccaria bicolor S238N-H82]}	{NA}	{lbc:LACBIDRAFT_298404; }	{NA}	{NA}	{NA}
A00658	{CONTIG11:990860:992176:-}	{gi|597983595|ref|XP_007330410.1|; hypothetical protein [Agaricus bisporus var. burnettii JB137-S8, AGABI1DRAFT_75193]}	{P36047; SDS22_YEAST Protein phosphatase 1 regulatory subunit SDS22 OS=Saccharomyces cerevisiae (strain ATCC 204508 / S288c) GN=SDS22 PE=1 SV=1}	{abp:AGABI1DRAFT75193; K17550 PPP1R7, SDS22 protein phosphatase 1 regulatory subunit 7 -- }	{YKL193c; KOG0531 Protein phosphatase 1, regulatory subunit, and related proteins T Signal transduction mechanisms ;}	{GO:0005515; protein binding; molecular_function}	{NA}
A00659	{CONTIG11:994317:996374:-}	{gi|597983221|ref|XP_007330317.1|; hypothetical protein AGABI1DRAFT_29371, partial [Agaricus bisporus var. burnettii JB137-S8]}	{NA}	{abp:AGABI1DRAFT29371; }	{NA}	{NA}	{NA}
A00660	{CONTIG11:996749:997563:+}	{gi|597984169|ref|XP_007330552.1|; hypothetical protein [Agaricus bisporus var. burnettii JB137-S8, AGABI1DRAFT_114339]}	{P25631; YCU1_YEAST Ankyrin repeat-containing protein YCR051W OS=Saccharomyces cerevisiae (strain ATCC 204508 / S288c) GN=YCR051W PE=1 SV=1}	{abp:AGABI1DRAFT114339; K06867 K06867 uncharacterized protein -- }	{YCR051w; KOG0504 FOG: Ankyrin repeat R General function prediction only ;}	{GO:0005515; protein binding; molecular_function}	{NA}
A00661	{CONTIG11:999707:1001890:+}	{gi|597927968|ref|XP_007318328.1|; hypothetical protein [Serpula lacrymans var. lacrymans S7.9, SERLADRAFT_356020]}	{Q8CIG8; ANM5_MOUSE Protein arginine N-methyltransferase 5 OS=Mus musculus GN=Prmt5 PE=1 SV=3}	{sla:SERLADRAFT_356020; K02516 PRMT5, HSL7 type II protein arginine methyltransferase 2.1.1.320 Genetic Information Processing; Translation; RNA transport [PATH:ko03013] Environmental Information Processing; Signal transduction; MAPK signaling pathway - yeast [PATH:ko04011] Cellular Processes; Cell growth and death; Cell cycle - yeast [PATH:ko04111] }	{Hs20070220; KOG0822 Protein kinase inhibitor D Cell cycle control, cell division, chromosome partitioning ;}	{GO:0006479; protein methylation; biological_process GO:0008168; methyltransferase activity; molecular_function}	{NA}
A00662	{CONTIG11:1003347:1010279:+}	{NA}	{NA}	{NA}	{NA}	{NA}	{NA}
A00663	{CONTIG11:1012816:1015482:-}	{gi|568450711|ref|XP_006459361.1|; hypothetical protein [Agaricus bisporus var. bisporus H97, AGABI2DRAFT_116339]}	{NA}	{abv:AGABI2DRAFT116339; K13754 SLC24A6, NCKX6 solute carrier family 24 (sodium/potassium/calcium exchanger), member 6 -- }	{NA}	{GO:0016020; membrane; cellular_component GO:0015694; mercury ion transport; biological_process GO:0015097; mercury ion transmembrane transporter activity; molecular_function GO:0016021; integral to membrane; cellular_component GO:0055085; transmembrane transport; biological_process}	{NA}
A00664	{CONTIG11:1015708:1017742:-}	{gi|648162633|gb|KDR76332.1|; hypothetical protein [Galerina marginata CBS 339.88, GALMADRAFT_247721]}	{NA}	{abp:AGABI1DRAFT130862; }	{NA}	{NA}	{NA}
A00665	{CONTIG11:1018345:1019860:+}	{gi|597984149|ref|XP_007330547.1|; hypothetical protein [Agaricus bisporus var. burnettii JB137-S8, AGABI1DRAFT_107224]}	{NA}	{abp:AGABI1DRAFT107224; }	{NA}	{GO:0004064; arylesterase activity; molecular_function}	{NA}
A00666	{CONTIG11:1020579:1022077:-}	{gi|568450704|ref|XP_006459359.1|; hypothetical protein [Agaricus bisporus var. bisporus H97, AGABI2DRAFT_218493]}	{NA}	{abv:AGABI2DRAFT218493; }	{NA}	{GO:0005515; protein binding; molecular_function}	{NA}
A00667	{CONTIG11:1023044:1026120:+}	{gi|597984145|ref|XP_007330546.1|; hypothetical protein [Agaricus bisporus var. burnettii JB137-S8, AGABI1DRAFT_114331]}	{O42938; PFKA_SCHPO ATP-dependent 6-phosphofructokinase OS=Schizosaccharomyces pombe (strain 972 / ATCC 24843) GN=pfk1 PE=1 SV=1}	{abp:AGABI1DRAFT114331; K00850 pfkA, PFK 6-phosphofructokinase 1 2.7.1.11 Metabolism; Carbohydrate metabolism; Glycolysis / Gluconeogenesis [PATH:ko00010] Metabolism; Carbohydrate metabolism; Pentose phosphate pathway [PATH:ko00030] Metabolism; Carbohydrate metabolism; Fructose and mannose metabolism [PATH:ko00051] Metabolism; Carbohydrate metabolism; Galactose metabolism [PATH:ko00052] Metabolis…	{SPBC16H5.02; KOG2440 Pyrophosphate-dependent phosphofructo-1-kinase G Carbohydrate transport and metabolism ;}	{GO:0007205; activation of protein kinase C activity by G-protein coupled receptor protein signaling pathway; biological_process GO:0004143; diacylglycerol kinase activity; molecular_function GO:0003872; 6-phosphofructokinase activity; molecular_function GO:0006096; glycolysis; biological_process GO:0005945; 6-phosphofructokinase complex; cellular_component}	{NA}
A00668	{CONTIG11:1026499:1028348:+}	{gi|568450698|ref|XP_006459357.1|; hypothetical protein [Agaricus bisporus var. bisporus H97, AGABI2DRAFT_201520]}	{NA}	{abv:AGABI2DRAFT201520; }	{NA}	{GO:0055114; oxidation-reduction process; biological_process GO:0016491; oxidoreductase activity; molecular_function GO:0008152; NA}	{NA}
A00669	{CONTIG11:1029506:1031623:+}	{gi|597984123|ref|XP_007330541.1|; hypothetical protein [Agaricus bisporus var. burnettii JB137-S8, AGABI1DRAFT_107215]}	{NA}	{abp:AGABI1DRAFT107215; K07300 chaA, CAX Ca2+:H+ antiporter -- }	{NA}	{GO:0016021; integral to membrane; cellular_component GO:0055085; transmembrane transport; biological_process}	{NA}
A00670	{CONTIG11:1032513:1034273:-}	{gi|568439748|ref|XP_006455719.1|; hypothetical protein [Agaricus bisporus var. bisporus H97, AGABI2DRAFT_121621]}	{NA}	{abv:AGABI2DRAFT121621; }	{NA}	{NA}	{NA}
A00671	{CONTIG11:1041069:1042754:-}	{gi|568439748|ref|XP_006455719.1|; hypothetical protein [Agaricus bisporus var. bisporus H97, AGABI2DRAFT_121621]}	{NA}	{abv:AGABI2DRAFT121621; }	{NA}	{NA}	{NA}
A00672	{CONTIG11:1045123:1046608:+}	{gi|597984137|ref|XP_007330544.1|; hypothetical protein [Agaricus bisporus var. burnettii JB137-S8, AGABI1DRAFT_114329]}	{NA}	{abp:AGABI1DRAFT114329; }	{NA}	{GO:0016020; membrane; cellular_component}	{NA}
A00673	{CONTIG11:1047541:1048917:+}	{gi|568450689|ref|XP_006459354.1|; hypothetical protein [Agaricus bisporus var. bisporus H97, AGABI2DRAFT_66371]}	{NA}	{abv:AGABI2DRAFT66371; }	{NA}	{NA}	{NA}
A00674	{CONTIG11:1049046:1049639:-}	{gi|568450686|ref|XP_006459353.1|; hypothetical protein [Agaricus bisporus var. bisporus H97, AGABI2DRAFT_65585]}	{NA}	{abv:AGABI2DRAFT65585; }	{NA}	{NA}	{NA}
A00675	{CONTIG11:1050671:1055183:-}	{gi|568450683|ref|XP_006459352.1|; hypothetical protein [Agaricus bisporus var. bisporus H97, AGABI2DRAFT_201513]}	{NA}	{abv:AGABI2DRAFT201513; K12200 PDCD6IP, ALIX, RIM20 programmed cell death 6-interacting protein -- Cellular Processes; Transport and catabolism; Endocytosis [PATH:ko04144] }	{NA}	{GO:0003677; DNA binding; molecular_function GO:0003899; DNA-directed RNA polymerase activity; molecular_function GO:0006383; transcription from RNA polymerase III promoter; biological_process GO:0005515; protein binding; molecular_function GO:0005666; DNA-directed RNA polymerase III complex; cellular_component}	{NA}
A00676	{CONTIG11:1056764:1062244:+}	{gi|568450680|ref|XP_006459351.1|; hypothetical protein AGABI2DRAFT_218479, partial [Agaricus bisporus var. bisporus H97]}	{P33277; GAP1_SCHPO GTPase-activating protein OS=Schizosaccharomyces pombe (strain 972 / ATCC 24843) GN=gap1 PE=4 SV=1}	{abp:AGABI1DRAFT59753; K05767 IQGAP2_3 Ras GTPase-activating-like protein IQGAP2/3 -- Cellular Processes; Cell motility; Regulation of actin cytoskeleton [PATH:ko04810] }	{SPBC646.12c; KOG2128 Ras GTPase-activating protein family - IQGAP T Signal transduction mechanisms ;}	{GO:0006508; proteolysis; biological_process GO:0007264; small GTPase mediated signal transduction; biological_process GO:0004190; aspartic-type endopeptidase activity; molecular_function GO:0008083; growth factor activity; molecular_function GO:0005134; interleukin-2 receptor binding; molecular_function GO:0051056; regulation of small GTPase mediated signal transduction; biological_process GO:00…	{NA}
A00677	{CONTIG11:1064783:1066291:-}	{NA}	{NA}	{NA}	{NA}	{NA}	{NA}
A00678	{CONTIG11:1066604:1067200:+}	{gi|568450668|ref|XP_006459347.1|; hypothetical protein [Agaricus bisporus]}	{O74820; ERG28_SCHPO Ergosterol biosynthetic protein 28 OS=Schizosaccharomyces pombe (strain 972 / ATCC 24843) GN=erg28 PE=3 SV=1}	{abp:AGABI1DRAFT114326; }	{SPBC337.09; KOG3455 Predicted membrane protein S Function unknown ;}	{GO:0016021; integral to membrane; cellular_component}	{NA}
A00679	{CONTIG11:1072583:1074949:+}	{gi|568450665|ref|XP_006459346.1|; hypothetical protein [Agaricus bisporus var. bisporus H97, AGABI2DRAFT_218464]}	{NA}	{abv:AGABI2DRAFT218464; }	{NA}	{NA}	{NA}
A00680	{CONTIG11:1075603:1078316:+}	{gi|597984123|ref|XP_007330541.1|; hypothetical protein [Agaricus bisporus var. burnettii JB137-S8, AGABI1DRAFT_107215]}	{Q75XW3; CAX_APHHA Ca(2+)/H(+) antiporter OS=Aphanothece halophytica PE=1 SV=1}	{abp:AGABI1DRAFT107215; K07300 chaA, CAX Ca2+:H+ antiporter -- }	{NA}	{GO:0055085; transmembrane transport; biological_process GO:0016021; integral to membrane; cellular_component}	{NA}
A00681	{CONTIG11:1079306:1080671:-}	{gi|299749760|ref|XP_001836310.2|; hydroxysteroid dehydrogenase [Coprinopsis cinerea okayama7#130]}	{Q8VYI3; ECH2_ARATH Enoyl-CoA hydratase 2, peroxisomal OS=Arabidopsis thaliana GN=ECH2 PE=1 SV=1}	{cci:CC1G_06395; K14729 FOX2 multifunctional beta-oxidation protein 4.2.1.- 1.1.1.- }	{CE01215; KOG1206 Peroxisomal multifunctional beta-oxidation protein and related enzymes I Lipid transport and metabolism ;}	{GO:0016491; oxidoreductase activity; molecular_function GO:0008152; NA}	{NA}
A00682	{CONTIG11:1080971:1081983:+}	{gi|299750280|ref|XP_001836649.2|; casein kinase subunit II beta [Coprinopsis cinerea okayama7#130]}	{P40232; CSK2B_SCHPO Casein kinase II subunit beta OS=Schizosaccharomyces pombe (strain 972 / ATCC 24843) GN=ckb1 PE=2 SV=2}	{cci:CC1G_06236; K03115 CSNK2B casein kinase II subunit beta -- Genetic Information Processing; Translation; Ribosome biogenesis in eukaryotes [PATH:ko03008] Environmental Information Processing; Signal transduction; NF-kappa B signaling pathway [PATH:ko04064] Cellular Processes; Transport and catabolism; Mitophagy - animal [PATH:ko04137] Cellular Processes; Transport and catabolism; Mitophagy - …	{SPAC1851.03; KOG3092 Casein kinase II, beta subunit TDK Signal transduction mechanisms ; Cell cycle control, cell division, chromosome partitioning ; Transcription ;}	{GO:0005956; protein kinase CK2 complex; cellular_component GO:0019887; protein kinase regulator activity; molecular_function}	{NA}
A00683	{CONTIG11:1082247:1084924:-}	{gi|568450659|ref|XP_006459344.1|; multifunctional beta-oxidation protein [Agaricus bisporus var. bisporus H97]}	{Q01373; FOX2_NEUCR Peroxisomal hydratase-dehydrogenase-epimerase OS=Neurospora crassa (strain ATCC 24698 / 74-OR23-1A / CBS 708.71 / DSM 1257 / FGSC 987) GN=fox-2 PE=1 SV=1}	{abv:AGABI2DRAFT149505; K14729 FOX2 multifunctional beta-oxidation protein 4.2.1.- 1.1.1.- }	{YKR009c; KOG1206 Peroxisomal multifunctional beta-oxidation protein and related enzymes I Lipid transport and metabolism ;}	{GO:0003857; 3-hydroxyacyl-CoA dehydrogenase activity; molecular_function GO:0055114; oxidation-reduction process; biological_process GO:0004488; methylenetetrahydrofolate dehydrogenase (NADP+) activity; molecular_function GO:0006631; fatty acid metabolic process; biological_process GO:0016491; oxidoreductase activity; molecular_function GO:0008152; NA GO:0009396; folic acid-containing compound b…	{NA}
A00684	{CONTIG11:1085760:1087587:-}	{gi|568450656|ref|XP_006459343.1|; hypothetical protein [Agaricus bisporus var. bisporus H97, AGABI2DRAFT_134807]}	{P24871; CG24_YEAST G2/mitotic-specific cyclin-4 OS=Saccharomyces cerevisiae (strain ATCC 204508 / S288c) GN=CLB4 PE=1 SV=2}	{abv:AGABI2DRAFT134807; }	{YLR210w; KOG0653 Cyclin B and related kinase-activating proteins D Cell cycle control, cell division, chromosome partitioning ;}	{GO:0005634; nucleus; cellular_component GO:0045893; positive regulation of transcription, DNA-dependent; biological_process}	{NA}
A00685	{CONTIG11:1089576:1095072:+}	{gi|568445270|ref|XP_006457558.1|; hypothetical protein [Agaricus bisporus var. bisporus H97, AGABI2DRAFT_181720]}	{NA}	{abp:AGABI1DRAFT109663; }	{NA}	{GO:0016037; light absorption; biological_process GO:0030089; phycobilisome; cellular_component GO:0031404; chloride ion binding; molecular_function}	{NA}
A00686	{CONTIG11:1096317:1101806:-}	{NA}	{NA}	{NA}	{NA}	{GO:0006367; transcription initiation from RNA polymerase II promoter; biological_process GO:0015074; DNA integration; biological_process GO:0005672; transcription factor TFIIA complex; cellular_component GO:0005515; protein binding; molecular_function}	{NA}
A00687	{CONTIG11:1102760:1104001:-}	{gi|597966347|ref|XP_007326113.1|; hypothetical protein [Agaricus bisporus var. burnettii JB137-S8, AGABI1DRAFT_35141]}	{NA}	{abp:AGABI1DRAFT35141; }	{NA}	{NA}	{NA}
A00688	{CONTIG11:1104590:1105293:+}	{NA}	{NA}	{NA}	{NA}	{NA}	{NA}
A00689	{CONTIG11:1105709:1107011:+}	{NA}	{NA}	{NA}	{NA}	{NA}	{NA}
A00690	{CONTIG11:1108229:1111715:-}	{gi|597975511|ref|XP_007328436.1|; hypothetical protein [Agaricus bisporus var. burnettii JB137-S8, AGABI1DRAFT_126893]}	{NA}	{abp:AGABI1DRAFT126893; }	{NA}	{GO:0005515; protein binding; molecular_function}	{NA}
A00691	{CONTIG11:1111843:1112463:+}	{NA}	{NA}	{NA}	{NA}	{GO:0006171; cAMP biosynthetic process; biological_process GO:0004016; adenylate cyclase activity; molecular_function GO:0000287; magnesium ion binding; molecular_function}	{NA}
A00692	{CONTIG11:1113764:1116341:+}	{gi|568445270|ref|XP_006457558.1|; hypothetical protein [Agaricus bisporus var. bisporus H97, AGABI2DRAFT_181720]}	{NA}	{abp:AGABI1DRAFT132592; }	{NA}	{GO:0005524; ATP binding; molecular_function GO:0004672; protein kinase activity; molecular_function GO:0006468; protein phosphorylation; biological_process}	{NA}
A00693	{CONTIG11:1121343:1122388:+}	{gi|648162610|gb|KDR76309.1|; hypothetical protein [Galerina marginata CBS 339.88, GALMADRAFT_247669]}	{NA}	{mrr:Moror_13109; }	{NA}	{GO:0005741; mitochondrial outer membrane; cellular_component}	{NA}
A00694	{CONTIG11:1122476:1124859:-}	{gi|597983583|ref|XP_007330407.1|; hypothetical protein [Agaricus bisporus var. burnettii JB137-S8, AGABI1DRAFT_75145]}	{Q5ATG5; APDG_EMENI Acyl-CoA dehydrogenase apdG OS=Emericella nidulans (strain FGSC A4 / ATCC 38163 / CBS 112.46 / NRRL 194 / M139) GN=apdG PE=2 SV=1}	{abp:AGABI1DRAFT75145; }	{NA}	{GO:0003995; acyl-CoA dehydrogenase activity; molecular_function GO:0008152; NA GO:0016627; oxidoreductase activity, acting on the CH-CH group of donors; molecular_function GO:0016491; oxidoreductase activity; molecular_function GO:0020037; heme binding; molecular_function GO:0055114; oxidation-reduction process; biological_process GO:0050660; flavin adenine dinucleotide binding; molecular_functi…	{NA}
A00695	{CONTIG11:1125301:1126049:+}	{gi|568450644|ref|XP_006459339.1|; hypothetical protein [Agaricus bisporus]}	{P0CP29; NPC2_CRYNB Phosphatidylglycerol/phosphatidylinositol transfer protein OS=Cryptococcus neoformans var. neoformans serotype D (strain B-3501A) GN=NPC2 PE=3 SV=1}	{abp:AGABI1DRAFT114313; }	{YDL046w; KOG4680 Uncharacterized conserved protein, contains ML domain R General function prediction only ;}	{NA}	{NA}
A00696	{CONTIG11:1126335:1128505:-}	{gi|568450641|ref|XP_006459338.1|; hypothetical protein [Agaricus bisporus var. bisporus H97, AGABI2DRAFT_191333]}	{NA}	{abv:AGABI2DRAFT191333; }	{NA}	{GO:0016020; membrane; cellular_component GO:0016798; hydrolase activity, acting on glycosyl bonds; molecular_function}	{NA}
A00697	{CONTIG11:1128994:1130585:+}	{gi|568450638|ref|XP_006459337.1|; hypothetical protein [Agaricus bisporus var. bisporus H97, AGABI2DRAFT_177311]}	{Q9UHK6; AMACR_HUMAN Alpha-methylacyl-CoA racemase OS=Homo sapiens GN=AMACR PE=1 SV=2}	{abv:AGABI2DRAFT177311; K01796 E5.1.99.4, AMACR, mcr alpha-methylacyl-CoA racemase 5.1.99.4 Metabolism; Lipid metabolism; Primary bile acid biosynthesis [PATH:ko00120] Cellular Processes; Transport and catabolism; Peroxisome [PATH:ko04146] }	{Hs14725900; KOG3957 Predicted L-carnitine dehydratase/alpha-methylacyl-CoA racemase I Lipid transport and metabolism ;}	{GO:0003824; NA GO:0008152; NA}	{NA}
A00698	{CONTIG11:1130833:1133173:+}	{gi|568450635|ref|XP_006459336.1|; acyl-CoA-dehydrogenase peroxisomal [Agaricus bisporus var. bisporus H97]}	{NA}	{abp:AGABI1DRAFT114309; }	{NA}	{GO:0003995; acyl-CoA dehydrogenase activity; molecular_function GO:0008152; NA GO:0016627; oxidoreductase activity, acting on the CH-CH group of donors; molecular_function GO:0016491; oxidoreductase activity; molecular_function GO:0020037; heme binding; molecular_function GO:0055114; oxidation-reduction process; biological_process GO:0050660; flavin adenine dinucleotide binding; molecular_functi…	{NA}
A00699	{CONTIG11:1140211:1142153:-}	{gi|568450632|ref|XP_006459335.1|; hypothetical protein [Agaricus bisporus var. bisporus H97, AGABI2DRAFT_116310]}	{NA}	{abv:AGABI2DRAFT116310; }	{NA}	{GO:0016021; integral to membrane; cellular_component}	{NA}
A00700	{CONTIG11:1144828:1148355:-}	{gi|568450626|ref|XP_006459333.1|; hypothetical protein [Agaricus bisporus var. bisporus H97, AGABI2DRAFT_191328]}	{NA}	{abv:AGABI2DRAFT191328; }	{NA}	{GO:0003677; DNA binding; molecular_function GO:0006351; transcription, DNA-dependent; biological_process GO:0005634; nucleus; cellular_component GO:0008270; zinc ion binding; molecular_function GO:0006355; regulation of transcription, DNA-dependent; biological_process GO:0000981; sequence-specific DNA binding RNA polymerase II transcription factor activity; molecular_function}	{NA}
A00701	{CONTIG11:1150769:1151255:-}	{gi|597984071|ref|XP_007330528.1|; hypothetical protein [Agaricus bisporus var. burnettii JB137-S8, AGABI1DRAFT_128986]}	{NA}	{abp:AGABI1DRAFT128986; }	{NA}	{GO:0000981; sequence-specific DNA binding RNA polymerase II transcription factor activity; molecular_function GO:0006355; regulation of transcription, DNA-dependent; biological_process GO:0008270; zinc ion binding; molecular_function GO:0005634; nucleus; cellular_component}	{NA}
A00702	{CONTIG11:1156463:1157074:-}	{NA}	{NA}	{NA}	{NA}	{NA}	{NA}
A00703	{CONTIG11:1160809:1163322:-}	{gi|597983447|ref|XP_007330373.1|; hypothetical protein AGABI1DRAFT_59713, partial [Agaricus bisporus var. burnettii JB137-S8]}	{O13890; YE35_SCHPO UPF0061 protein C20G4.05c OS=Schizosaccharomyces pombe (strain 972 / ATCC 24843) GN=SPAC20G4.05c PE=3 SV=1}	{abp:AGABI1DRAFT59713; }	{SPAC20G4.05c; KOG2542 Uncharacterized conserved protein (YdiU family) S Function unknown ;}	{NA}	{NA}
A00704	{CONTIG11:1163448:1164598:+}	{gi|568450611|ref|XP_006459328.1|; hypothetical protein AGABI2DRAFT_65316, partial [Agaricus bisporus var. bisporus H97]}	{NA}	{abv:AGABI2DRAFT65316; }	{NA}	{GO:0045454; cell redox homeostasis; biological_process GO:0055114; oxidation-reduction process; biological_process GO:0015035; protein disulfide oxidoreductase activity; molecular_function GO:0008270; zinc ion binding; molecular_function GO:0016491; oxidoreductase activity; molecular_function GO:0009055; NA GO:0006813; potassium ion transport; biological_process}	{NA}
A00705	{CONTIG11:1164855:1165599:-}	{gi|597983309|ref|XP_007330339.1|; hypothetical protein [Agaricus bisporus var. burnettii JB137-S8, AGABI1DRAFT_41107]}	{NA}	{abp:AGABI1DRAFT41107; K12948 SPCS3, SPC3 signal peptidase complex subunit 3 3.4.-.- Genetic Information Processing; Folding, sorting and degradation; Protein export [PATH:ko03060] }	{NA}	{GO:0006465; signal peptide processing; biological_process GO:0005787; signal peptidase complex; cellular_component GO:0008233; peptidase activity; molecular_function GO:0016021; integral to membrane; cellular_component}	{NA}
A00706	{CONTIG11:1166137:1166965:+}	{gi|568450605|ref|XP_006459326.1|; hypothetical protein [Agaricus bisporus var. bisporus H97, AGABI2DRAFT_201458]}	{NA}	{abv:AGABI2DRAFT201458; }	{NA}	{NA}	{NA}
A00707	{CONTIG11:1167414:1168498:-}	{gi|568450602|ref|XP_006459325.1|; hypothetical protein [Agaricus bisporus var. bisporus H97, AGABI2DRAFT_218424]}	{NA}	{abv:AGABI2DRAFT218424; }	{NA}	{NA}	{NA}
A00708	{CONTIG11:1172332:1173855:+}	{gi|568450593|ref|XP_006459322.1|; hypothetical protein [Agaricus bisporus var. bisporus H97, AGABI2DRAFT_184045]}	{NA}	{abv:AGABI2DRAFT184045; K08329 ATG17 autophagy-related protein 17 -- Cellular Processes; Transport and catabolism; Autophagy - yeast [PATH:ko04138] }	{NA}	{GO:0005198; NA GO:0006914; autophagy; biological_process GO:0019028; viral capsid; cellular_component GO:0017124; SH3 domain binding; molecular_function GO:0019031; viral envelope; cellular_component GO:0007165; signal transduction; biological_process GO:0046847; filopodium assembly; biological_process GO:0008093; cytoskeletal adaptor activity; molecular_function}	{NA}
A00709	{CONTIG11:1174367:1176095:+}	{gi|568450590|ref|XP_006459321.1|; hypothetical protein [Agaricus bisporus]}	{P78712; ARP3_NEUCR Actin-related protein 3 OS=Neurospora crassa (strain ATCC 24698 / 74-OR23-1A / CBS 708.71 / DSM 1257 / FGSC 987) GN=arp-3 PE=2 SV=2}	{abp:AGABI1DRAFT114299; K18584 ACTR3, ARP3 actin-related protein 3 -- Cellular Processes; Transport and catabolism; Autophagy - yeast [PATH:ko04138] Cellular Processes; Cellular community - eukaryotes; Tight junction [PATH:ko04530] }	{SPAC630.03; KOG0678 Actin-related protein Arp2/3 complex, subunit Arp3 Z Cytoskeleton ;}	{NA}	{NA}
A00710	{CONTIG11:1177005:1181817:+}	{gi|597984047|ref|XP_007330522.1|; hypothetical protein [Agaricus bisporus var. burnettii JB137-S8, AGABI1DRAFT_121124]}	{NA}	{abp:AGABI1DRAFT121124; }	{NA}	{GO:0055085; transmembrane transport; biological_process GO:0006810; transport; biological_process GO:0051301; cell division; biological_process GO:0005525; GTP binding; molecular_function GO:0007059; chromosome segregation; biological_process GO:0003924; GTPase activity; molecular_function GO:0017176; phosphatidylinositol N-acetylglucosaminyltransferase activity; molecular_function GO:0016887; A…	{NA}
A00711	{CONTIG11:1183778:1184119:-}	{NA}	{NA}	{NA}	{NA}	{NA}	{NA}
A00712	{CONTIG11:1187673:1189115:-}	{NA}	{NA}	{NA}	{NA}	{GO:0035556; intracellular signal transduction; biological_process GO:0005515; protein binding; molecular_function}	{NA}
A00713	{CONTIG11:1189709:1191687:+}	{gi|597984039|ref|XP_007330520.1|; hypothetical protein [Agaricus bisporus var. burnettii JB137-S8, AGABI1DRAFT_114296]}	{Q10156; LKH1_SCHPO Dual specificity protein kinase lkh1 OS=Schizosaccharomyces pombe (strain 972 / ATCC 24843) GN=lkh1 PE=1 SV=3}	{abp:AGABI1DRAFT114296; K08287 E2.7.12.1 dual-specificity kinase 2.7.12.1 }	{SPAC1D4.11c; KOG0671 LAMMER dual specificity kinases T Signal transduction mechanisms ;}	{GO:0004672; protein kinase activity; molecular_function GO:0006468; protein phosphorylation; biological_process GO:0005524; ATP binding; molecular_function}	{NA}
A00714	{CONTIG11:1193275:1197416:-}	{gi|597984031|ref|XP_007330518.1|; hypothetical protein [Agaricus bisporus var. burnettii JB137-S8, AGABI1DRAFT_114293]}	{NA}	{abp:AGABI1DRAFT114293; }	{NA}	{GO:0006508; proteolysis; biological_process GO:0004190; aspartic-type endopeptidase activity; molecular_function}	{NA}
A00715	{CONTIG11:1198639:1200203:-}	{gi|568450572|ref|XP_006459315.1|; hypothetical protein [Agaricus bisporus var. bisporus H97, AGABI2DRAFT_65664]}	{P38674; ILV5_NEUCR Ketol-acid reductoisomerase, mitochondrial OS=Neurospora crassa (strain ATCC 24698 / 74-OR23-1A / CBS 708.71 / DSM 1257 / FGSC 987) GN=ilv-2 PE=3 SV=2}	{abv:AGABI2DRAFT65664; K00053 ilvC ketol-acid reductoisomerase 1.1.1.86 }	{NA}	{GO:0004455; ketol-acid reductoisomerase activity; molecular_function GO:0008652; cellular amino acid biosynthetic process; biological_process GO:0009082; branched chain family amino acid biosynthetic process; biological_process GO:0055114; oxidation-reduction process; biological_process}	{NA}
A00716	{CONTIG11:1202314:1203557:+}	{gi|170098825|ref|XP_001880631.1|; predicted protein [Laccaria bicolor S238N-H82]}	{A5DCB6; TMLH_PICGU Trimethyllysine dioxygenase OS=Meyerozyma guilliermondii (strain ATCC 6260 / CBS 566 / DSM 6381 / JCM 1539 / NBRC 10279 / NRRL Y-324) GN=PGUG_00921 PE=3 SV=2}	{lbc:LACBIDRAFT_249619; K00474 TMLHE trimethyllysine dioxygenase 1.14.11.8 Metabolism; Amino acid metabolism; Lysine degradation [PATH:ko00310] }	{NA}	{GO:0055114; oxidation-reduction process; biological_process GO:0005506; iron ion binding; molecular_function GO:0016491; oxidoreductase activity; molecular_function}	{NA}
A00717	{CONTIG11:1203661:1205882:-}	{gi|568450569|ref|XP_006459314.1|; hypothetical protein [Agaricus bisporus var. bisporus H97, AGABI2DRAFT_184036]}	{P0CM02; LYS4_CRYNJ Homoaconitase, mitochondrial OS=Cryptococcus neoformans var. neoformans serotype D (strain JEC21 / ATCC MYA-565) GN=LYS4 PE=3 SV=1}	{abv:AGABI2DRAFT184036; K01705 LYS4 homoaconitate hydratase 4.2.1.36 }	{SPAC343.16; KOG0453 Aconitase/homoaconitase (aconitase superfamily) CE Energy production and conversion ; Amino acid transport and metabolism ;}	{GO:0008152; NA}	{NA}
A00718	{CONTIG11:1206333:1208132:+}	{gi|568457355|ref|XP_006461568.1|; hypothetical protein [Agaricus bisporus var. bisporus H97, AGABI2DRAFT_205367]}	{NA}	{abv:AGABI2DRAFT205367; }	{NA}	{GO:0005975; carbohydrate metabolic process; biological_process GO:0004553; hydrolase activity, hydrolyzing O-glycosyl compounds; molecular_function}	{CCA69481.1_GH5; {PIIN_03381;--;Piriformospora indica (Pirin1);--} endo-&beta;-1,4-glucanase / cellulase (EC 3.2.1.4); endo-&beta;-1,4-xylanase (EC 3.2.1.8); &beta;-glucosidase (EC 3.2.1.21); &beta;-mannosidase (EC 3.2.1.25); &beta;-glucosylceramidase (EC 3.2.1.45); glucan &beta;-1,3-glucosidase (EC 3.2.1.58); licheninase (EC 3.2.1.73); exo-&beta;-1,4-glucanase / cellodextrinase (EC 3.2.1.74); gl…
A00719	{CONTIG11:1210704:1211747:+}	{gi|597986575|ref|XP_007331134.1|; hypothetical protein [Agaricus bisporus var. burnettii JB137-S8, AGABI1DRAFT_107662]}	{NA}	{abp:AGABI1DRAFT107662; }	{NA}	{NA}	{NA}
A00720	{CONTIG11:1211828:1212982:+}	{gi|568438418|ref|XP_006455277.1|; hypothetical protein [Agaricus bisporus var. bisporus H97, AGABI2DRAFT_138510]}	{NA}	{abv:AGABI2DRAFT138510; }	{NA}	{NA}	{NA}
A00721	{CONTIG11:1213845:1214219:-}	{NA}	{NA}	{NA}	{NA}	{NA}	{NA}
A00722	{CONTIG11:1215456:1216721:-}	{gi|568450563|ref|XP_006459312.1|; hypothetical protein [Agaricus bisporus]}	{NA}	{abp:AGABI1DRAFT75089; }	{NA}	{GO:0016021; integral to membrane; cellular_component GO:0006481; C-terminal protein methylation; biological_process GO:0004671; protein C-terminal S-isoprenylcysteine carboxyl O-methyltransferase activity; molecular_function}	{NA}
A00723	{CONTIG11:1216780:1217656:+}	{gi|568450560|ref|XP_006459311.1|; hypothetical protein [Agaricus bisporus var. bisporus H97, AGABI2DRAFT_134777]}	{NA}	{abv:AGABI2DRAFT134777; }	{NA}	{NA}	{NA}
A00724	{CONTIG11:1217730:1218189:-}	{gi|648165213|gb|KDR78893.1|; hypothetical protein [Galerina marginata CBS 339.88, GALMADRAFT_64504]}	{NA}	{lbc:LACBIDRAFT_297072; }	{NA}	{NA}	{NA}
A00725	{CONTIG11:1218407:1220880:+}	{gi|597984019|ref|XP_007330515.1|; hypothetical protein [Agaricus bisporus var. burnettii JB137-S8, AGABI1DRAFT_85596]}	{NA}	{abp:AGABI1DRAFT85596; }	{NA}	{GO:0016491; oxidoreductase activity; molecular_function GO:0050660; flavin adenine dinucleotide binding; molecular_function GO:0055114; oxidation-reduction process; biological_process}	{NA}
A00726	{CONTIG11:1221479:1226255:+}	{gi|597984005|ref|XP_007330512.1|; hypothetical protein [Agaricus bisporus var. burnettii JB137-S8, AGABI1DRAFT_121111]}	{NA}	{abp:AGABI1DRAFT121111; K03509 POLH DNA polymerase eta 2.7.7.7 Human Diseases; Drug resistance; Platinum drug resistance [PATH:ko01524] Genetic Information Processing; Replication and repair; Fanconi anemia pathway [PATH:ko03460] }	{NA}	{GO:0007186; G-protein coupled receptor protein signaling pathway; biological_process GO:0003684; damaged DNA binding; molecular_function GO:0006281; DNA repair; biological_process GO:0003887; DNA-directed DNA polymerase activity; molecular_function GO:0016021; integral to membrane; cellular_component GO:0007166; cell surface receptor linked signaling pathway; biological_process GO:0004930; G-pro…	{NA}
A00727	{CONTIG11:1226907:1227911:+}	{gi|597983997|ref|XP_007330510.1|; hypothetical protein [Agaricus bisporus var. burnettii JB137-S8, AGABI1DRAFT_128959]}	{NA}	{abp:AGABI1DRAFT128959; K18159 NDUFAF1, CIA30 NADH dehydrogenase [ubiquinone] 1 alpha subcomplex assembly factor 1 -- }	{NA}	{GO:0008810; cellulase activity; molecular_function GO:0030245; cellulose catabolic process; biological_process}	{NA}
A00728	{CONTIG11:1228243:1229375:-}	{gi|568450539|ref|XP_006459304.1|; hypothetical protein [Agaricus bisporus var. bisporus H97, AGABI2DRAFT_149467]}	{P28775; RAS_LENED Ras-like protein OS=Lentinula edodes PE=3 SV=1}	{abv:AGABI2DRAFT149467; K07827 KRAS, KRAS2 GTPase KRas -- Human Diseases; Drug resistance; EGFR tyrosine kinase inhibitor resistance [PATH:ko01521] Human Diseases; Drug resistance; Endocrine resistance [PATH:ko01522] Environmental Information Processing; Signal transduction; MAPK signaling pathway [PATH:ko04010] Environmental Information Processing; Signal transduction; ErbB signaling pathway [PA…	{SPAC17H9.09c; KOG0395 Ras-related GTPase R General function prediction only ;}	{GO:0007264; small GTPase mediated signal transduction; biological_process GO:0007186; G-protein coupled receptor protein signaling pathway; biological_process GO:0019001; guanyl nucleotide binding; molecular_function GO:0031683; G-protein beta/gamma-subunit complex binding; molecular_function GO:0016787; hydrolase activity; molecular_function GO:0016021; integral to membrane; cellular_component …	{NA}
A00729	{CONTIG11:1230180:1231414:-}	{gi|568450536|ref|XP_006459303.1|; hypothetical protein [Agaricus bisporus var. bisporus H97, AGABI2DRAFT_191304]}	{NA}	{abv:AGABI2DRAFT191304; }	{NA}	{GO:0051537; 2 iron, 2 sulfur cluster binding; molecular_function GO:0043231; intracellular membrane-bounded organelle; cellular_component}	{NA}
A00730	{CONTIG11:1231562:1232912:-}	{gi|628831345|ref|XP_007765976.1|; WD40 repeat-like protein, partial [Coniophora puteana RWD-64-598 SS2]}	{NA}	{cput:CONPUDRAFT_119885; K14962 WDR82, SWD2, CPS35 COMPASS component SWD2 -- Genetic Information Processing; Translation; mRNA surveillance pathway [PATH:ko03015] }	{NA}	{GO:0005515; protein binding; molecular_function}	{NA}
A00731	{CONTIG11:1233003:1233917:+}	{gi|568450530|ref|XP_006459301.1|; hypothetical protein AGABI2DRAFT_191302, partial [Agaricus bisporus var. bisporus H97]}	{Q5R587; RPAB1_PONAB DNA-directed RNA polymerases I, II, and III subunit RPABC1 OS=Pongo abelii GN=POLR2E PE=2 SV=1}	{abp:AGABI1DRAFT114282; K03013 RPB5, POLR2E DNA-directed RNA polymerases I, II, and III subunit RPABC1 -- Metabolism; Nucleotide metabolism; Purine metabolism [PATH:ko00230] Metabolism; Nucleotide metabolism; Pyrimidine metabolism [PATH:ko00240] Genetic Information Processing; Transcription; RNA polymerase [PATH:ko03020] Organismal Systems; Immune system; Cytosolic DNA-sensing pathway [PATH:ko046…	{SPAC23C4.15; KOG3218 RNA polymerase, 25-kDa subunit (common to polymerases I, II and III) K Transcription ;}	{GO:0006351; transcription, DNA-dependent; biological_process GO:0003677; DNA binding; molecular_function GO:0004519; endonuclease activity; molecular_function GO:0003899; DNA-directed RNA polymerase activity; molecular_function GO:0005634; nucleus; cellular_component GO:0009307; DNA restriction-modification system; biological_process}	{NA}
A00732	{CONTIG11:1237026:1238276:+}	{gi|568450527|ref|XP_006459300.1|; hypothetical protein [Agaricus bisporus]}	{A8NU13; COP4_COPC7 Linoleate 10R-lipoxygenase COP4 OS=Coprinopsis cinerea (strain Okayama-7 / 130 / ATCC MYA-4618 / FGSC 9003) GN=COP4 PE=1 SV=1}	{abp:AGABI1DRAFT100710; }	{NA}	{GO:0016829; lyase activity; molecular_function GO:0016106; sesquiterpenoid biosynthetic process; biological_process GO:0010333; terpene synthase activity; molecular_function GO:0000287; magnesium ion binding; molecular_function GO:0045482; trichodiene synthase activity; molecular_function}	{NA}
A00733	{CONTIG11:1240225:1243602:-}	{gi|597983381|ref|XP_007330357.1|; hypothetical protein [Agaricus bisporus var. burnettii JB137-S8, AGABI1DRAFT_41416]}	{Q1K8G0; CBL_NEUCR Cystathionine beta-lyase OS=Neurospora crassa (strain ATCC 24698 / 74-OR23-1A / CBS 708.71 / DSM 1257 / FGSC 987) GN=met-2 PE=1 SV=1}	{abp:AGABI1DRAFT41416; }	{At3g57050; KOG0053 Cystathionine beta-lyases/cystathionine gamma-synthases E Amino acid transport and metabolism ;}	{GO:0005524; ATP binding; molecular_function GO:0030170; pyridoxal phosphate binding; molecular_function GO:0009058; biosynthetic process; biological_process}	{NA}
A00734	{CONTIG11:1243723:1246357:+}	{gi|568450518|ref|XP_006459297.1|; hypothetical protein [Agaricus bisporus var. bisporus H97, AGABI2DRAFT_191298]}	{Q9Y823; HOSM_SCHPO Homocitrate synthase, mitochondrial OS=Schizosaccharomyces pombe (strain 972 / ATCC 24843) GN=lys4 PE=1 SV=1}	{abv:AGABI2DRAFT191298; K01655 LYS21, LYS20 homocitrate synthase 2.3.3.14 }	{SPBC1105.02c; KOG2367 Alpha-isopropylmalate synthase/homocitrate synthase E Amino acid transport and metabolism ;}	{GO:0003824; NA}	{NA}
A00735	{CONTIG11:1247086:1252519:-}	{gi|299749815|ref|XP_002911425.1|; atypical/HisK protein kinase [Coprinopsis cinerea okayama7#130]}	{NA}	{mrr:Moror_4621; }	{NA}	{GO:0000156; two-component response regulator activity; molecular_function GO:0016020; membrane; cellular_component GO:0000155; two-component sensor activity; molecular_function GO:0005524; ATP binding; molecular_function GO:0000160; two-component signal transduction system (phosphorelay); biological_process GO:0006355; regulation of transcription, DNA-dependent; biological_process GO:0007165; si…	{NA}
A00736	{CONTIG11:1253806:1255606:-}	{gi|646298793|gb|KDQ19948.1|; hypothetical protein [Botryobasidium botryosum FD-172 SS1, BOTBODRAFT_101902]}	{NA}	{mgl:MGL_1869; }	{SPCC63.10c; KOG2468 Dolichol kinase I Lipid transport and metabolism ;}	{GO:0022900; electron transport chain; biological_process GO:0005747; mitochondrial respiratory chain complex I; cellular_component GO:0005739; mitochondrion; cellular_component}	{NA}
A00737	{CONTIG11:1257326:1258704:+}	{gi|568450512|ref|XP_006459295.1|; hypothetical protein [Agaricus bisporus var. bisporus H97, AGABI2DRAFT_218352]}	{P12887; UNG_YEAST Uracil-DNA glycosylase OS=Saccharomyces cerevisiae (strain ATCC 204508 / S288c) GN=UNG1 PE=1 SV=1}	{abv:AGABI2DRAFT218352; K03648 UNG, UDG uracil-DNA glycosylase 3.2.2.27 Genetic Information Processing; Replication and repair; Base excision repair [PATH:ko03410] Human Diseases; Immune diseases; Primary immunodeficiency [PATH:ko05340] }	{YML021c; KOG2994 Uracil DNA glycosylase L Replication, recombination and repair ;}	{NA}	{NA}
A00738	{CONTIG11:1261133:1264423:-}	{gi|568450506|ref|XP_006459293.1|; hypothetical protein [Agaricus bisporus var. bisporus H97, AGABI2DRAFT_218349]}	{O13768; ERCC3_SCHPO Probable DNA repair helicase ercc3 OS=Schizosaccharomyces pombe (strain 972 / ATCC 24843) GN=ercc3 PE=1 SV=1}	{abv:AGABI2DRAFT218349; K10843 ERCC3, XPB DNA excision repair protein ERCC-3 3.6.4.12 Genetic Information Processing; Transcription; Basal transcription factors [PATH:ko03022] Genetic Information Processing; Replication and repair; Nucleotide excision repair [PATH:ko03420] }	{SPAC17A5.06; KOG1123 RNA polymerase II transcription initiation/nucleotide excision repair factor TFIIH, 3'-5' helicase subunit SSL2 KL Transcription ; Replication, recombination and repair ;}	{GO:0005524; ATP binding; molecular_function GO:0004386; helicase activity; molecular_function GO:0016787; hydrolase activity; molecular_function GO:0003676; nucleic acid binding; molecular_function GO:0003677; DNA binding; molecular_function}	{NA}
A00739	{CONTIG11:1264572:1266383:+}	{gi|691789090|emb|CDO74913.1|; hypothetical protein [Trametes cinnabarina, BN946_scf184988.g20]}	{P0CO45; BBP_CRYNB Branchpoint-bridging protein OS=Cryptococcus neoformans var. neoformans serotype D (strain B-3501A) GN=BBP PE=3 SV=1}	{fme:FOMMEDRAFT_17228; K13095 SF1 splicing factor 1 -- }	{SPCC962.06c; KOG0119 Splicing factor 1/branch point binding protein (RRM superfamily) A RNA processing and modification ;}	{GO:0003676; nucleic acid binding; molecular_function GO:0051082; unfolded protein binding; molecular_function GO:0031072; heat shock protein binding; molecular_function GO:0008270; zinc ion binding; molecular_function GO:0003723; RNA binding; molecular_function}	{NA}
A00740	{CONTIG11:1269185:1276982:+}	{gi|597983565|ref|XP_007330402.1|; hypothetical protein [Agaricus bisporus var. burnettii JB137-S8, AGABI1DRAFT_75039]}	{P42348; PI3K2_SOYBN Phosphatidylinositol 3-kinase, nodule isoform OS=Glycine max PE=2 SV=1}	{abp:AGABI1DRAFT75039; K00914 PIK3C3, VPS34 phosphatidylinositol 3-kinase 2.7.1.137 Metabolism; Carbohydrate metabolism; Inositol phosphate metabolism [PATH:ko00562] Environmental Information Processing; Signal transduction; Phosphatidylinositol signaling system [PATH:ko04070] Cellular Processes; Transport and catabolism; Autophagy - other eukaryotes [PATH:ko04136] Cellular Processes; Transport a…	{NA}	{GO:0016151; nickel ion binding; molecular_function GO:0006388; tRNA splicing, via endonucleolytic cleavage and ligation; biological_process GO:0031072; heat shock protein binding; molecular_function GO:0018279; protein N-linked glycosylation via asparagine; biological_process GO:0006464; protein modification process; biological_process GO:0016772; transferase activity, transferring phosphorus-co…	{NA}
A00741	{CONTIG11:1277116:1279067:-}	{gi|646300956|gb|KDQ22107.1|; hypothetical protein [Pleurotus ostreatus PC15, PLEOSDRAFT_1068548]}	{NA}	{mrr:Moror_12324; }	{NA}	{GO:0016491; oxidoreductase activity; molecular_function GO:0019139; cytokinin dehydrogenase activity; molecular_function GO:0008762; UDP-N-acetylmuramate dehydrogenase activity; molecular_function GO:0009690; cytokinin metabolic process; biological_process GO:0055114; oxidation-reduction process; biological_process GO:0050660; flavin adenine dinucleotide binding; molecular_function}	{NA}
A00742	{CONTIG11:1280284:1282886:-}	{gi|597983561|ref|XP_007330401.1|; hypothetical protein [Agaricus bisporus var. burnettii JB137-S8, AGABI1DRAFT_75033]}	{NA}	{abp:AGABI1DRAFT75033; K19562 BIO3-BIO1 bifunctional dethiobiotin synthetase / adenosylmethionine---8-amino-7-oxononanoate aminotransferase 6.3.3.3 2.6.1.62 Metabolism; Metabolism of cofactors and vitamins; Biotin metabolism [PATH:ko00780] }	{NA}	{GO:0008483; transaminase activity; molecular_function GO:0030170; pyridoxal phosphate binding; molecular_function}	{NA}
A00743	{CONTIG11:1283321:1284832:-}	{gi|597983963|ref|XP_007330501.1|; hypothetical protein [Agaricus bisporus var. burnettii JB137-S8, AGABI1DRAFT_114265]}	{NA}	{abp:AGABI1DRAFT114265; }	{NA}	{NA}	{NA}
A00744	{CONTIG11:1286513:1286916:-}	{gi|646303415|gb|KDQ24563.1|; hypothetical protein [Pleurotus ostreatus PC15, PLEOSDRAFT_52429]}	{NA}	{NA}	{NA}	{NA}	{NA}
A00745	{CONTIG11:1287552:1293889:+}	{gi|568450476|ref|XP_006459283.1|; hypothetical protein [Agaricus bisporus var. bisporus H97, AGABI2DRAFT_177274]}	{NA}	{abv:AGABI2DRAFT177274; K18715 NUP159 nucleoporin NUP159 -- }	{NA}	{NA}	{NA}
A00746	{CONTIG11:1293962:1294838:-}	{gi|646392784|gb|KDQ57298.1|; hypothetical protein [Jaapia argillacea MUCL 33604, JAAARDRAFT_35936]}	{NA}	{pco:PHACADRAFT_158876; K05019 CLNS1A chloride channel, nucleotide-sensitive, 1A -- Genetic Information Processing; Translation; RNA transport [PATH:ko03013] }	{NA}	{NA}	{NA}
A00747	{CONTIG11:1294996:1295840:+}	{gi|568450470|ref|XP_006459281.1|; hypothetical protein AGABI2DRAFT_191280, partial [Agaricus bisporus var. bisporus H97]}	{NA}	{abv:AGABI2DRAFT191280; K20522 LSB1_2 LAS seventeen-binding protein 1/2 -- }	{NA}	{GO:0005515; protein binding; molecular_function}	{NA}
A00748	{CONTIG11:1298146:1298900:+}	{gi|568450467|ref|XP_006459280.1|; hypothetical protein [Agaricus bisporus]}	{NA}	{abp:AGABI1DRAFT41368; }	{NA}	{NA}	{NA}
A00749	{CONTIG11:1299317:1304834:-}	{gi|597983943|ref|XP_007330496.1|; hypothetical protein [Agaricus bisporus var. burnettii JB137-S8, AGABI1DRAFT_100687]}	{NA}	{abp:AGABI1DRAFT100687; }	{NA}	{GO:0004725; protein tyrosine phosphatase activity; molecular_function GO:0006470; protein dephosphorylation; biological_process GO:0008138; protein tyrosine/serine/threonine phosphatase activity; molecular_function}	{NA}
A00750	{CONTIG11:1305148:1307808:+}	{gi|597983939|ref|XP_007330495.1|; hypothetical protein [Agaricus bisporus var. burnettii JB137-S8, AGABI1DRAFT_128934]}	{NA}	{abp:AGABI1DRAFT128934; }	{NA}	{NA}	{NA}
A00751	{CONTIG11:1308164:1309844:-}	{gi|568450458|ref|XP_006459277.1|; hypothetical protein [Agaricus bisporus var. bisporus H97, AGABI2DRAFT_201352]}	{NA}	{abv:AGABI2DRAFT201352; K16576 ACTR10, ARP11 actin-related protein 10 -- }	{NA}	{NA}	{NA}
A00752	{CONTIG11:1310415:1311720:-}	{gi|597983935|ref|XP_007330494.1|; hypothetical protein [Agaricus bisporus var. burnettii JB137-S8, AGABI1DRAFT_114257]}	{NA}	{abp:AGABI1DRAFT114257; }	{NA}	{NA}	{NA}
A00753	{CONTIG11:1311836:1312922:+}	{gi|597983553|ref|XP_007330399.1|; hypothetical protein [Agaricus bisporus var. burnettii JB137-S8, AGABI1DRAFT_75017]}	{NA}	{abp:AGABI1DRAFT75017; K21805 METTL21C protein N-lysine methyltransferase METTL21C 2.1.1.- }	{NA}	{GO:0006464; protein modification process; biological_process GO:0004719; protein-L-isoaspartate (D-aspartate) O-methyltransferase activity; molecular_function}	{NA}
A00754	{CONTIG11:1316357:1318792:-}	{gi|568450446|ref|XP_006459273.1|; hypothetical protein [Agaricus bisporus var. bisporus H97, AGABI2DRAFT_183996]}	{NA}	{abv:AGABI2DRAFT183996; }	{NA}	{NA}	{NA}
A00755	{CONTIG11:1319058:1321090:+}	{gi|568450443|ref|XP_006459272.1|; hypothetical protein [Agaricus bisporus var. bisporus H97, AGABI2DRAFT_134742]}	{NA}	{abv:AGABI2DRAFT134742; K17785 IMMT, FCJ1, MNOS2 mitofilin -- }	{NA}	{NA}	{NA}
A00756	{CONTIG11:1322053:1322883:+}	{gi|597983923|ref|XP_007330491.1|; hypothetical protein [Agaricus bisporus var. burnettii JB137-S8, AGABI1DRAFT_114253]}	{NA}	{abp:AGABI1DRAFT114253; }	{NA}	{NA}	{NA}
A00757	{CONTIG11:1323807:1325727:-}	{gi|630181089|ref|XP_007845365.1|; nucleoporin nup45 [Moniliophthora roreri MCA 2997]}	{NA}	{mrr:Moror_3912; K14307 NUPL1, NUP49 nucleoporin p58/p45 -- Genetic Information Processing; Translation; RNA transport [PATH:ko03013] }	{NA}	{NA}	{NA}
A00758	{CONTIG11:1326911:1329483:+}	{gi|597983915|ref|XP_007330489.1|; hypothetical protein [Agaricus bisporus var. burnettii JB137-S8, AGABI1DRAFT_107154]}	{O42783; TREB_NEUCR Neutral trehalase OS=Neurospora crassa (strain ATCC 24698 / 74-OR23-1A / CBS 708.71 / DSM 1257 / FGSC 987) GN=treB PE=2 SV=2}	{abp:AGABI1DRAFT107154; K01194 TREH, treA, treF alpha,alpha-trehalase 3.2.1.28 Metabolism; Carbohydrate metabolism; Starch and sucrose metabolism [PATH:ko00500] }	{SPBC660.07; KOG0602 Neutral trehalase G Carbohydrate transport and metabolism ;}	{GO:0005737; cytoplasm; cellular_component GO:0005509; calcium ion binding; molecular_function GO:0005993; trehalose catabolic process; biological_process GO:0005991; trehalose metabolic process; biological_process GO:0004555; alpha,alpha-trehalase activity; molecular_function}	{AGM46812.1_GH37; {neutral trehalase;--;Rhizoctonia solani;--} &alpha;,&alpha;-trehalase (EC 3.2.1.28). NA}
A00759	{CONTIG11:1329866:1330833:-}	{gi|568450431|ref|XP_006459268.1|; hypothetical protein [Agaricus bisporus var. bisporus H97, AGABI2DRAFT_191269]}	{Q9UJA2; CRLS1_HUMAN Cardiolipin synthase (CMP-forming) OS=Homo sapiens GN=CRLS1 PE=1 SV=1}	{abv:AGABI2DRAFT191269; K08744 CRLS cardiolipin synthase (CMP-forming) 2.7.8.41 Metabolism; Lipid metabolism; Glycerophospholipid metabolism [PATH:ko00564] }	{SPAC22A12.08c_2; KOG1617 CDP-alcohol phosphatidyltransferase/Phosphatidylglycerol-phosphate synthase I Lipid transport and metabolism ;}	{GO:0016780; phosphotransferase activity, for other substituted phosphate groups; molecular_function GO:0016020; membrane; cellular_component GO:0008654; phospholipid biosynthetic process; biological_process}	{NA}
A00760	{CONTIG11:1330893:1332522:+}	{gi|568450428|ref|XP_006459267.1|; hypothetical protein [Agaricus bisporus var. bisporus H97, AGABI2DRAFT_116245]}	{P0CO61; ATG15_CRYNB Putative lipase ATG15 OS=Cryptococcus neoformans var. neoformans serotype D (strain B-3501A) GN=ATG15 PE=3 SV=1}	{abv:AGABI2DRAFT116245; }	{YCR068w; KOG4540 Putative lipase essential for disintegration of autophagic bodies inside the vacuole UI Intracellular trafficking, secretion, and vesicular transport ; Lipid transport and metabolism ;}	{GO:0006886; intracellular protein transport; biological_process GO:0006505; GPI anchor metabolic process; biological_process GO:0004806; triglyceride lipase activity; molecular_function GO:0006629; lipid metabolic process; biological_process GO:0016788; hydrolase activity, acting on ester bonds; molecular_function}	{NA}
A00761	{CONTIG11:1333549:1334085:+}	{gi|597983549|ref|XP_007330398.1|; hypothetical protein [Agaricus bisporus var. burnettii JB137-S8, AGABI1DRAFT_74994]}	{NA}	{abp:AGABI1DRAFT74994; K11270 CTF8 chromosome transmission fidelity protein 8 -- }	{NA}	{NA}	{NA}
A00762	{CONTIG11:1339477:1341166:-}	{gi|568450419|ref|XP_006459264.1|; hypothetical protein [Agaricus bisporus var. bisporus H97, AGABI2DRAFT_177261]}	{NA}	{abv:AGABI2DRAFT177261; }	{NA}	{NA}	{NA}
A00763	{CONTIG11:1342842:1344534:-}	{gi|597983541|ref|XP_007330396.1|; hypothetical protein [Agaricus bisporus var. burnettii JB137-S8, AGABI1DRAFT_74990]}	{NA}	{abp:AGABI1DRAFT74990; K18164 NDUFAF7 NADH dehydrogenase [ubiquinone] 1 alpha subcomplex assembly factor 7 -- }	{NA}	{NA}	{NA}
A00764	{CONTIG11:1344913:1345870:+}	{gi|568450410|ref|XP_006459261.1|; hypothetical protein [Agaricus bisporus]}	{Q12522; IF6_YEAST Eukaryotic translation initiation factor 6 OS=Saccharomyces cerevisiae (strain ATCC 204508 / S288c) GN=TIF6 PE=1 SV=1}	{abp:AGABI1DRAFT114248; K03264 EIF6 translation initiation factor 6 -- Genetic Information Processing; Translation; Ribosome biogenesis in eukaryotes [PATH:ko03008] }	{YPR016c; KOG3185 Translation initiation factor 6 (eIF-6) J Translation, ribosomal structure and biogenesis ;}	{GO:0043022; ribosome binding; molecular_function GO:0042256; mature ribosome assembly; biological_process}	{NA}
A00765	{CONTIG11:1346277:1349018:+}	{NA}	{NA}	{NA}	{NA}	{GO:0016491; oxidoreductase activity; molecular_function GO:0016209; NA GO:0055114; oxidation-reduction process; biological_process}	{NA}
A00766	{CONTIG11:1350179:1352907:-}	{gi|568450400|ref|XP_006459258.1|; hypothetical protein [Agaricus bisporus var. bisporus H97, AGABI2DRAFT_177257]}	{Q10074; AVT3_SCHPO Vacuolar amino acid transporter 3 OS=Schizosaccharomyces pombe (strain 972 / ATCC 24843) GN=avt3 PE=1 SV=1}	{abv:AGABI2DRAFT177257; K14209 SLC36A, PAT solute carrier family 36 (proton-coupled amino acid transporter) -- Cellular Processes; Transport and catabolism; Autophagy - yeast [PATH:ko04138] }	{SPAC3H1.09c; KOG1304 Amino acid transporters E Amino acid transport and metabolism ;}	{NA}	{NA}
A00767	{CONTIG11:1353965:1356454:+}	{gi|568456201|ref|XP_006461186.1|; hypothetical protein [Agaricus bisporus var. bisporus H97, AGABI2DRAFT_150975]}	{NA}	{abv:AGABI2DRAFT150975; }	{NA}	{GO:0005506; iron ion binding; molecular_function GO:0055114; oxidation-reduction process; biological_process GO:0020037; heme binding; molecular_function GO:0016705; oxidoreductase activity, acting on paired donors, with incorporation or reduction of molecular oxygen; molecular_function}	{NA}
A00768	{CONTIG11:1357776:1360071:-}	{gi|568450397|ref|XP_006459257.1|; hypothetical protein [Agaricus bisporus var. bisporus H97, AGABI2DRAFT_116236]}	{NA}	{abv:AGABI2DRAFT116236; }	{NA}	{GO:0035091; phosphatidylinositol binding; molecular_function}	{NA}
A00769	{CONTIG11:1360880:1362640:+}	{gi|597983883|ref|XP_007330481.1|; hypothetical protein [Agaricus bisporus var. burnettii JB137-S8, AGABI1DRAFT_114241]}	{NA}	{abp:AGABI1DRAFT114241; }	{NA}	{GO:0055085; transmembrane transport; biological_process GO:0030001; metal ion transport; biological_process GO:0016020; membrane; cellular_component GO:0046873; metal ion transmembrane transporter activity; molecular_function}	{NA}
A00770	{CONTIG11:1362788:1363358:-}	{gi|568450391|ref|XP_006459255.1|; hypothetical protein [Agaricus bisporus var. bisporus H97, AGABI2DRAFT_66700]}	{NA}	{abv:AGABI2DRAFT66700; K15139 MED22 mediator of RNA polymerase II transcription subunit 22 -- }	{NA}	{GO:0006357; regulation of transcription from RNA polymerase II promoter; biological_process GO:0001104; RNA polymerase II transcription cofactor activity; molecular_function GO:0016592; mediator complex; cellular_component}	{NA}
A00771	{CONTIG11:1365793:1366593:-}	{NA}	{NA}	{NA}	{NA}	{NA}	{NA}
A00772	{CONTIG11:1367037:1368124:+}	{gi|568450388|ref|XP_006459254.1|; hypothetical protein [Agaricus bisporus var. bisporus H97, AGABI2DRAFT_177253]}	{NA}	{abv:AGABI2DRAFT177253; }	{NA}	{GO:0003700; sequence-specific DNA binding transcription factor activity; molecular_function GO:0043565; sequence-specific DNA binding; molecular_function GO:0006355; regulation of transcription, DNA-dependent; biological_process GO:0008270; zinc ion binding; molecular_function}	{NA}
A00773	{CONTIG11:1369175:1370773:-}	{gi|597983421|ref|XP_007330367.1|; hypothetical protein [Agaricus bisporus var. burnettii JB137-S8, AGABI1DRAFT_59555]}	{B5BP48; YP54_SCHPO Putative alpha-ketoglutarate-dependent sulfonate dioxygenase OS=Schizosaccharomyces pombe (strain 972 / ATCC 24843) GN=SPBC460.04c PE=3 SV=1}	{abp:AGABI1DRAFT59555; K19245 JLP1 sulfonate dioxygenase 1.14.11.- }	{NA}	{GO:0016491; oxidoreductase activity; molecular_function GO:0055114; oxidation-reduction process; biological_process}	{NA}
A00774	{CONTIG11:1371674:1372378:-}	{gi|597983233|ref|XP_007330320.1|; hypothetical protein [Agaricus bisporus var. burnettii JB137-S8, AGABI1DRAFT_40760]}	{NA}	{abp:AGABI1DRAFT40760; K10871 RAD51L3, RAD51D RAD51-like protein 3 -- Genetic Information Processing; Replication and repair; Homologous recombination [PATH:ko03440] }	{NA}	{NA}	{NA}
A00775	{CONTIG11:1372452:1375309:+}	{gi|597983875|ref|XP_007330479.1|; hypothetical protein [Agaricus bisporus var. burnettii JB137-S8, AGABI1DRAFT_107141]}	{NA}	{abp:AGABI1DRAFT107141; K12397 AP3B AP-3 complex subunit beta -- Cellular Processes; Transport and catabolism; Lysosome [PATH:ko04142] }	{NA}	{GO:0006874; cellular calcium ion homeostasis; biological_process GO:0016192; vesicle-mediated transport; biological_process GO:0032040; small-subunit processome; cellular_component GO:0030117; membrane coat; cellular_component GO:0005634; nucleus; cellular_component GO:0005219; ryanodine-sensitive calcium-release channel activity; molecular_function GO:0016021; integral to membrane; cellular_com…	{NA}
A00776	{CONTIG11:1377801:1378503:-}	{gi|568450373|ref|XP_006459249.1|; hypothetical protein [Agaricus bisporus var. bisporus H97, AGABI2DRAFT_134722]}	{P38143; GPX2_YEAST Glutathione peroxidase 2 OS=Saccharomyces cerevisiae (strain ATCC 204508 / S288c) GN=GPX2 PE=1 SV=1}	{abv:AGABI2DRAFT134722; K00432 gpx glutathione peroxidase 1.11.1.9 Metabolism; Metabolism of other amino acids; Glutathione metabolism [PATH:ko00480] Metabolism; Lipid metabolism; Arachidonic acid metabolism [PATH:ko00590] Organismal Systems; Endocrine system; Thyroid hormone synthesis [PATH:ko04918] }	{YBR244w; KOG1651 Glutathione peroxidase O Posttranslational modification, protein turnover, chaperones ;}	{GO:0006355; regulation of transcription, DNA-dependent; biological_process GO:0016491; oxidoreductase activity; molecular_function GO:0016209; NA GO:0006979; response to oxidative stress; biological_process GO:0004602; glutathione peroxidase activity; molecular_function GO:0003677; DNA binding; molecular_function GO:0055114; oxidation-reduction process; biological_process}	{NA}
A00777	{CONTIG11:1379458:1382756:-}	{gi|630206080|ref|XP_007853433.1|; telomerase reverse transcriptase [Moniliophthora roreri MCA 2997]}	{NA}	{psq:PUNSTDRAFT_20563; K11126 TERT, EST2 telomerase reverse transcriptase 2.7.7.49 Human Diseases; Infectious diseases; Human papillomavirus infection [PATH:ko05165] Human Diseases; Infectious diseases; HTLV-I infection [PATH:ko05166] Human Diseases; Cancers; Pathways in cancer [PATH:ko05200] Human Diseases; Cancers; Hepatocellular carcinoma [PATH:ko05225] Human Diseases; Cancers; Gastric cancer …	{NA}	{GO:0003723; RNA binding; molecular_function GO:0003964; RNA-directed DNA polymerase activity; molecular_function GO:0006278; RNA-dependent DNA replication; biological_process}	{NA}
A00778	{CONTIG11:1382881:1383381:-}	{NA}	{NA}	{NA}	{NA}	{GO:0003743; translation initiation factor activity; molecular_function GO:0006413; translational initiation; biological_process GO:0005740; mitochondrial envelope; cellular_component}	{NA}
A00779	{CONTIG11:1385064:1386046:-}	{gi|568450371|ref|XP_006459248.1|; hypothetical protein [Agaricus bisporus]}	{NA}	{abp:AGABI1DRAFT114235; }	{NA}	{GO:0005876; spindle microtubule; cellular_component GO:0042729; DASH complex; cellular_component GO:0008608; attachment of spindle microtubules to kinetochore; biological_process GO:0005515; protein binding; molecular_function}	{NA}
A00780	{CONTIG11:1388633:1389205:-}	{NA}	{NA}	{NA}	{NA}	{NA}	{NA}
A00781	{CONTIG11:1389344:1392072:-}	{gi|597983855|ref|XP_007330474.1|; hypothetical protein [Agaricus bisporus var. burnettii JB137-S8, AGABI1DRAFT_114233]}	{P0CO39; IWS1_CRYNB Transcription factor IWS1 OS=Cryptococcus neoformans var. neoformans serotype D (strain B-3501A) GN=IWS1 PE=3 SV=1}	{abp:AGABI1DRAFT114233; K17498 SPN1, IWS1 transcription factor SPN1 -- }	{NA}	{GO:0003677; DNA binding; molecular_function GO:0006351; transcription, DNA-dependent; biological_process GO:0005634; nucleus; cellular_component GO:0006270; DNA-dependent DNA replication initiation; biological_process}	{NA}
A00782	{CONTIG11:1394615:1396164:-}	{gi|597983851|ref|XP_007330473.1|; hypothetical protein [Agaricus bisporus var. burnettii JB137-S8, AGABI1DRAFT_114231]}	{P48601; PRS4_DROME 26S protease regulatory subunit 4 OS=Drosophila melanogaster GN=Rpt2 PE=1 SV=2}	{abp:AGABI1DRAFT114231; K03062 PSMC1, RPT2 26S proteasome regulatory subunit T2 -- Genetic Information Processing; Folding, sorting and degradation; Proteasome [PATH:ko03050] Human Diseases; Infectious diseases; Human papillomavirus infection [PATH:ko05165] Human Diseases; Infectious diseases; Epstein-Barr virus infection [PATH:ko05169] Human Diseases; Cancers; Viral carcinogenesis [PATH:ko05203]…	{7301070; KOG0726 26S proteasome regulatory complex, ATPase RPT2 O Posttranslational modification, protein turnover, chaperones ;}	{GO:0015979; photosynthesis; biological_process GO:0005524; ATP binding; molecular_function GO:0016887; ATPase activity; molecular_function GO:0003723; RNA binding; molecular_function GO:0015995; chlorophyll biosynthetic process; biological_process GO:0003678; DNA helicase activity; molecular_function GO:0016851; magnesium chelatase activity; molecular_function GO:0006281; DNA repair; biological_…	{NA}
A00783	{CONTIG11:1396285:1397595:+}	{gi|597983847|ref|XP_007330472.1|; hypothetical protein [Agaricus bisporus var. burnettii JB137-S8, AGABI1DRAFT_114230]}	{Q54RZ2; YIPF6_DICDI Protein YIPF6 homolog OS=Dictyostelium discoideum GN=yipf6 PE=3 SV=2}	{abp:AGABI1DRAFT114230; }	{SPAC644.13c; KOG2946 Uncharacterized conserved protein S Function unknown ;}	{GO:0016020; membrane; cellular_component}	{NA}
A00784	{CONTIG11:1397818:1400733:-}	{gi|568450347|ref|XP_006459240.1|; hypothetical protein [Agaricus bisporus var. bisporus H97, AGABI2DRAFT_116217]}	{NA}	{abv:AGABI2DRAFT116217; }	{NA}	{GO:0006891; intra-Golgi vesicle-mediated transport; biological_process GO:0044780; NA GO:0017119; Golgi transport complex; cellular_component}	{NA}
A00785	{CONTIG11:1401268:1402389:+}	{gi|568450344|ref|XP_006459239.1|; hypothetical protein [Agaricus bisporus var. bisporus H97, AGABI2DRAFT_201274]}	{NA}	{abv:AGABI2DRAFT201274; }	{NA}	{GO:0005737; cytoplasm; cellular_component GO:0004671; protein C-terminal S-isoprenylcysteine carboxyl O-methyltransferase activity; molecular_function GO:0006629; lipid metabolic process; biological_process GO:0016020; membrane; cellular_component GO:0016627; oxidoreductase activity, acting on the CH-CH group of donors; molecular_function GO:0006481; C-terminal protein methylation; biological_pr…	{NA}
A00786	{CONTIG11:1402580:1403290:-}	{gi|597983839|ref|XP_007330470.1|; hypothetical protein [Agaricus bisporus var. burnettii JB137-S8, AGABI1DRAFT_85532]}	{NA}	{abp:AGABI1DRAFT85532; }	{NA}	{NA}	{NA}
A00787	{CONTIG11:1404583:1405783:+}	{gi|568450338|ref|XP_006459237.1|; C5-sterol desaturase [Agaricus bisporus var. bisporus H97]}	{Q8J207; ERG3_LEPMC Delta(7)-sterol 5(6)-desaturase OS=Leptosphaeria maculans GN=ERG3 PE=3 SV=1}	{abp:AGABI1DRAFT59529; K00227 SC5DL, ERG3 Delta7-sterol 5-desaturase 1.14.19.20 Metabolism; Lipid metabolism; Steroid biosynthesis [PATH:ko00100] }	{Hs20558831; KOG0872 Sterol C5 desaturase I Lipid transport and metabolism ;}	{GO:0005506; iron ion binding; molecular_function GO:0055114; oxidation-reduction process; biological_process GO:0016491; oxidoreductase activity; molecular_function GO:0006633; fatty acid biosynthetic process; biological_process}	{NA}
A00788	{CONTIG11:1406089:1408319:+}	{gi|648165331|gb|KDR79011.1|; hypothetical protein [Galerina marginata CBS 339.88, GALMADRAFT_224262]}	{NA}	{sla:SERLADRAFT_349023; }	{NA}	{GO:0016705; oxidoreductase activity, acting on paired donors, with incorporation or reduction of molecular oxygen; molecular_function GO:0055114; oxidation-reduction process; biological_process GO:0020037; heme binding; molecular_function GO:0005506; iron ion binding; molecular_function}	{NA}
A00789	{CONTIG11:1408863:1410360:-}	{gi|568450335|ref|XP_006459236.1|; hypothetical protein [Agaricus bisporus]}	{P41838; RAE1_SCHPO Poly(A)+ RNA export protein OS=Schizosaccharomyces pombe (strain 972 / ATCC 24843) GN=rae1 PE=1 SV=1}	{abp:AGABI1DRAFT114226; K14298 RAE1, GLE2 mRNA export factor -- Genetic Information Processing; Translation; RNA transport [PATH:ko03013] Human Diseases; Infectious diseases; Influenza A [PATH:ko05164] }	{SPBC16A3.05c; KOG0647 mRNA export protein (contains WD40 repeats) A RNA processing and modification ;}	{GO:0005515; protein binding; molecular_function}	{NA}
A00790	{CONTIG11:1411503:1415705:-}	{gi|597983409|ref|XP_007330364.1|; hypothetical protein [Agaricus bisporus var. burnettii JB137-S8, AGABI1DRAFT_59521]}	{Q9HDW7; ATC2_SCHPO Calcium-transporting ATPase 2 OS=Schizosaccharomyces pombe (strain 972 / ATCC 24843) GN=pmc1 PE=3 SV=1}	{abp:AGABI1DRAFT59521; K01537 E3.6.3.8 Ca2+-transporting ATPase 3.6.3.8 }	{SPAPB2B4.04c; KOG0204 Calcium transporting ATPase P Inorganic ion transport and metabolism ;}	{GO:0000166; nucleotide binding; molecular_function GO:0046872; metal ion binding; molecular_function}	{NA}
A00791	{CONTIG11:1417431:1420790:-}	{gi|568450329|ref|XP_006459234.1|; alpha, alpha-trehalose-phosphate synthase TPS1 subunit [Agaricus bisporus var. bisporus H97]}	{Q00075; TPSA_ASPNG Alpha,alpha-trehalose-phosphate synthase [UDP-forming] 1 OS=Aspergillus niger GN=tpsA PE=3 SV=1}	{abv:AGABI2DRAFT66173; K00697 otsA trehalose 6-phosphate synthase 2.4.1.15 2.4.1.347 Metabolism; Carbohydrate metabolism; Starch and sucrose metabolism [PATH:ko00500] }	{SPAC328.03; KOG1050 Trehalose-6-phosphate synthase component TPS1 and related subunits G Carbohydrate transport and metabolism ;}	{GO:0005840; ribosome; cellular_component GO:0042254; ribosome biogenesis; biological_process GO:0003735; structural constituent of ribosome; molecular_function GO:0005622; intracellular; cellular_component GO:0006414; translational elongation; biological_process GO:0005515; protein binding; molecular_function GO:0003824; NA GO:0005992; trehalose biosynthetic process; biological_process}	{CAC42133.1_GT20; {Tps1 (fragment);--;Amanita muscaria;Q96VT9} &alpha;,&alpha;-trehalose-phosphate synthase [UDP-forming] (EC 2.4.1.15); Glucosylglycerol-phosphate synthase (EC 2.4.1.213); trehalose-6-P phosphatase (EC 3.1.3.12); [retaining] GDP-valeniol: validamine 7-phosphate valeniolyltransferase (EC 2.-.-.-) NA}
A00792	{CONTIG11:1422176:1424521:+}	{gi|568450323|ref|XP_006459232.1|; hypothetical protein [Agaricus bisporus var. bisporus H97, AGABI2DRAFT_177235]}	{NA}	{abv:AGABI2DRAFT177235; }	{NA}	{NA}	{NA}
A00793	{CONTIG11:1426499:1428952:-}	{gi|568450317|ref|XP_006459230.1|; hypothetical protein [Agaricus bisporus var. bisporus H97, AGABI2DRAFT_201250]}	{NA}	{abv:AGABI2DRAFT201250; K14807 DDX51, DBP6 ATP-dependent RNA helicase DDX51/DBP6 3.6.4.13 }	{NA}	{GO:0004386; helicase activity; molecular_function GO:0016787; hydrolase activity; molecular_function GO:0008026; ATP-dependent helicase activity; molecular_function GO:0005524; ATP binding; molecular_function GO:0003677; DNA binding; molecular_function GO:0003676; nucleic acid binding; molecular_function}	{NA}
A00794	{CONTIG11:1429840:1431916:+}	{gi|568450308|ref|XP_006459227.1|; hypothetical protein [Agaricus bisporus var. bisporus H97, AGABI2DRAFT_116205]}	{NA}	{abv:AGABI2DRAFT116205; }	{NA}	{GO:0003677; DNA binding; molecular_function GO:0043565; sequence-specific DNA binding; molecular_function GO:0003700; sequence-specific DNA binding transcription factor activity; molecular_function GO:0009439; cyanate metabolic process; biological_process GO:0016987; sigma factor activity; molecular_function GO:0006352; transcription initiation, DNA-dependent; biological_process GO:0006355; regu…	{NA}
A00795	{CONTIG11:1432441:1437845:-}	{gi|568450305|ref|XP_006459226.1|; hypothetical protein [Agaricus bisporus var. bisporus H97, AGABI2DRAFT_201241]}	{NA}	{abv:AGABI2DRAFT201241; }	{NA}	{GO:0016021; integral to membrane; cellular_component GO:0007049; cell cycle; biological_process GO:0042626; ATPase activity, coupled to transmembrane movement of substances; molecular_function GO:0016887; ATPase activity; molecular_function GO:0005524; ATP binding; molecular_function GO:0003924; GTPase activity; molecular_function GO:0007059; chromosome segregation; biological_process GO:0005525…	{NA}
A00796	{CONTIG11:1438954:1441151:+}	{gi|568450302|ref|XP_006459225.1|; hypothetical protein [Agaricus bisporus var. bisporus H97, AGABI2DRAFT_183956]}	{NA}	{abv:AGABI2DRAFT183956; }	{NA}	{GO:0015343; siderophore transmembrane transporter activity; molecular_function GO:0019290; siderophore biosynthetic process; biological_process}	{NA}
A00797	{CONTIG11:1442600:1444487:+}	{gi|597983405|ref|XP_007330363.1|; hypothetical protein [Agaricus bisporus var. burnettii JB137-S8, AGABI1DRAFT_59499]}	{NA}	{abp:AGABI1DRAFT59499; }	{NA}	{GO:0015343; siderophore transmembrane transporter activity; molecular_function GO:0019290; siderophore biosynthetic process; biological_process}	{NA}
A00798	{CONTIG11:1444745:1446177:+}	{gi|568450296|ref|XP_006459223.1|; hypothetical protein [Agaricus bisporus var. bisporus H97, AGABI2DRAFT_218205]}	{NA}	{abv:AGABI2DRAFT218205; }	{NA}	{GO:0005515; protein binding; molecular_function}	{NA}
A00799	{CONTIG11:1449767:1450740:-}	{gi|568450290|ref|XP_006459221.1|; hypothetical protein [Agaricus bisporus]}	{NA}	{abp:AGABI1DRAFT114213; }	{NA}	{GO:0015035; protein disulfide oxidoreductase activity; molecular_function}	{NA}
A00800	{CONTIG11:1453017:1458004:+}	{gi|568450281|ref|XP_006459218.1|; hypothetical protein [Agaricus bisporus var. bisporus H97, AGABI2DRAFT_191227]}	{P32604; F26_YEAST Fructose-2,6-bisphosphatase OS=Saccharomyces cerevisiae (strain ATCC 204508 / S288c) GN=FBP26 PE=1 SV=2}	{abv:AGABI2DRAFT191227; K19029 PFKFB2 6-phosphofructo-2-kinase / fructose-2,6-biphosphatase 2 2.7.1.105 3.1.3.46 Metabolism; Carbohydrate metabolism; Fructose and mannose metabolism [PATH:ko00051] Environmental Information Processing; Signal transduction; AMPK signaling pathway [PATH:ko04152] Organismal Systems; Endocrine system; Thyroid hormone signaling pathway [PATH:ko04919] }	{YJL155c; KOG0234 Fructose-6-phosphate 2-kinase/fructose-2,6-biphosphatase G Carbohydrate transport and metabolism ;}	{GO:0006468; protein phosphorylation; biological_process GO:0004672; protein kinase activity; molecular_function GO:0003873; 6-phosphofructo-2-kinase activity; molecular_function GO:0006000; fructose metabolic process; biological_process GO:0005524; ATP binding; molecular_function}	{NA}
A00801	{CONTIG11:1458376:1458765:+}	{gi|568450278|ref|XP_006459217.1|; hypothetical protein [Agaricus bisporus]}	{NA}	{abp:AGABI1DRAFT128874; }	{NA}	{NA}	{NA}
A00802	{CONTIG11:1459758:1461245:+}	{gi|568450275|ref|XP_006459216.1|; hypothetical protein [Agaricus bisporus var. bisporus H97, AGABI2DRAFT_218192]}	{NA}	{abv:AGABI2DRAFT218192; K11121 SIR2 NAD-dependent histone deacetylase SIR2 3.5.1.- Metabolism; Metabolism of cofactors and vitamins; Nicotinate and nicotinamide metabolism [PATH:ko00760] Organismal Systems; Aging; Longevity regulating pathway - multiple species [PATH:ko04213] }	{NA}	{GO:0070403; NAD+ binding; molecular_function}	{NA}
A00803	{CONTIG11:1461496:1462272:-}	{gi|568450272|ref|XP_006459215.1|; hypothetical protein [Agaricus bisporus var. bisporus H97, AGABI2DRAFT_116194]}	{NA}	{abv:AGABI2DRAFT116194; }	{NA}	{GO:0005681; spliceosomal complex; cellular_component GO:0000398; nuclear mRNA splicing, via spliceosome; biological_process}	{NA}
A00804	{CONTIG11:1462654:1464186:+}	{gi|597983783|ref|XP_007330456.1|; hypothetical protein [Agaricus bisporus var. burnettii JB137-S8, AGABI1DRAFT_114207]}	{Q09195; ERG24_SCHPO Delta(14)-sterol reductase OS=Schizosaccharomyces pombe (strain 972 / ATCC 24843) GN=erg24 PE=2 SV=1}	{abp:AGABI1DRAFT114207; K00222 TM7SF2, ERG24 Delta14-sterol reductase 1.3.1.70 Metabolism; Lipid metabolism; Steroid biosynthesis [PATH:ko00100] }	{SPBC16G5.18; KOG1435 Sterol reductase/lamin B receptor IT Lipid transport and metabolism ; Signal transduction mechanisms ;}	{GO:0004671; protein C-terminal S-isoprenylcysteine carboxyl O-methyltransferase activity; molecular_function GO:0016020; membrane; cellular_component GO:0006481; C-terminal protein methylation; biological_process GO:0016021; integral to membrane; cellular_component}	{NA}
A00805	{CONTIG11:1464361:1465678:-}	{gi|169859026|ref|XP_001836154.1|; hypothetical protein [Coprinopsis cinerea okayama7#130, CC1G_10935]}	{NA}	{cci:CC1G_10935; }	{NA}	{NA}	{AAW46655.1_GH128; {CNL06520;--;Cryptococcus neoformans var. neoformans JEC21 (Cryne_JEC21_1);--} &beta;-1,3-glucanase (EC 3.2.1.39) Created following a paper by Sakamoto and colleagues (PMID:21965406); distantly related to clan GH-A}
A00806	{CONTIG11:1465913:1468875:-}	{gi|597983779|ref|XP_007330455.1|; hypothetical protein [Agaricus bisporus var. burnettii JB137-S8, AGABI1DRAFT_107115]}	{NA}	{abp:AGABI1DRAFT107115; }	{NA}	{NA}	{NA}
A00807	{CONTIG11:1472236:1475391:+}	{gi|568450260|ref|XP_006459211.1|; hypothetical protein [Agaricus bisporus var. bisporus H97, AGABI2DRAFT_177223]}	{NA}	{abv:AGABI2DRAFT177223; }	{NA}	{GO:0005509; calcium ion binding; molecular_function GO:0009405; pathogenesis; biological_process GO:0016020; membrane; cellular_component GO:0005576; NA}	{NA}
A00808	{CONTIG11:1475856:1478213:-}	{gi|597983767|ref|XP_007330452.1|; hypothetical protein [Agaricus bisporus var. burnettii JB137-S8, AGABI1DRAFT_128865]}	{NA}	{abp:AGABI1DRAFT128865; }	{NA}	{NA}	{NA}
A00809	{CONTIG11:1478266:1478557:+}	{gi|695555519|ref|XP_009546919.1|; hypothetical protein [Heterobasidion irregulare TC 32-1, HETIRDRAFT_45316]}	{O14256; YE6A_SCHPO Uncharacterized protein C6G10.10c OS=Schizosaccharomyces pombe (strain 972 / ATCC 24843) GN=SPAC6G10.10c PE=4 SV=1}	{hir:HETIRDRAFT_45316; }	{SPAC6G10.10c; KOG4520 Predicted coiled-coil protein R General function prediction only ;}	{GO:0070588; calcium ion transmembrane transport; biological_process GO:0005245; voltage-gated calcium channel activity; molecular_function GO:0005891; voltage-gated calcium channel complex; cellular_component}	{NA}
A00810	{CONTIG11:1478942:1481317:-}	{gi|597983763|ref|XP_007330451.1|; hypothetical protein [Agaricus bisporus var. burnettii JB137-S8, AGABI1DRAFT_85507]}	{O13998; OLA1_SCHPO Obg-like ATPase 1 OS=Schizosaccharomyces pombe (strain 972 / ATCC 24843) GN=SPAC27E2.03c PE=1 SV=1}	{abp:AGABI1DRAFT85507; K19788 OLA1 obg-like ATPase 1 -- }	{SPAC27E2.03c; KOG1491 Predicted GTP-binding protein (ODN superfamily) R General function prediction only ;}	{GO:0005525; GTP binding; molecular_function GO:0015093; ferrous iron transmembrane transporter activity; molecular_function GO:0015684; ferrous iron transport; biological_process GO:0016021; integral to membrane; cellular_component}	{NA}
A00811	{CONTIG11:1482729:1485747:+}	{NA}	{NA}	{NA}	{NA}	{NA}	{NA}
A00812	{CONTIG11:1485810:1486713:-}	{gi|597983759|ref|XP_007330450.1|; hypothetical protein [Agaricus bisporus var. burnettii JB137-S8, AGABI1DRAFT_114200]}	{NA}	{abp:AGABI1DRAFT114200; }	{NA}	{NA}	{NA}
A00813	{CONTIG11:1487026:1487767:+}	{gi|597983755|ref|XP_007330449.1|; hypothetical protein [Agaricus bisporus var. burnettii JB137-S8, AGABI1DRAFT_100627]}	{NA}	{abp:AGABI1DRAFT100627; K15627 ASPSCR1, ASPL tether containing UBX domain for GLUT4 -- Human Diseases; Cancers; Transcriptional misregulation in cancers [PATH:ko05202] }	{NA}	{GO:0005515; protein binding; molecular_function}	{NA}
A00814	{CONTIG11:1487996:1489493:-}	{gi|568450242|ref|XP_006459205.1|; hypothetical protein [Agaricus bisporus var. bisporus H97, AGABI2DRAFT_66857]}	{Q9VLJ8; MOCS3_DROME Adenylyltransferase and sulfurtransferase MOCS3 OS=Drosophila melanogaster GN=CG13090 PE=1 SV=1}	{abp:AGABI1DRAFT40960; K11996 MOCS3, UBA4 adenylyltransferase and sulfurtransferase 2.7.7.80 2.8.1.11 Genetic Information Processing; Folding, sorting and degradation; Sulfur relay system [PATH:ko04122] }	{7297432; KOG2017 Molybdopterin synthase sulfurylase H Coenzyme transport and metabolism ;}	{GO:0055114; oxidation-reduction process; biological_process GO:0051287; NAD binding; molecular_function GO:0003824; NA GO:0008677; 2-dehydropantoate 2-reductase activity; molecular_function GO:0016616; oxidoreductase activity, acting on the CH-OH group of donors, NAD or NADP as acceptor; molecular_function}	{NA}
A00815	{CONTIG11:1491113:1497554:-}	{gi|568450236|ref|XP_006459203.1|; hypothetical protein [Agaricus bisporus var. bisporus H97, AGABI2DRAFT_116178]}	{NA}	{abv:AGABI2DRAFT116178; }	{NA}	{GO:0005524; ATP binding; molecular_function GO:0008026; ATP-dependent helicase activity; molecular_function GO:0005515; protein binding; molecular_function GO:0004386; helicase activity; molecular_function GO:0016787; hydrolase activity; molecular_function GO:0003676; nucleic acid binding; molecular_function GO:0003677; DNA binding; molecular_function}	{NA}
A00816	{CONTIG11:1497706:1498619:-}	{gi|568450227|ref|XP_006459200.1|; hypothetical protein [Agaricus bisporus var. bisporus H97, AGABI2DRAFT_191211]}	{P08645; RAS3_DROME Ras-like protein 3 OS=Drosophila melanogaster GN=R PE=2 SV=2}	{abv:AGABI2DRAFT191211; }	{7292172; KOG0395 Ras-related GTPase R General function prediction only ;}	{GO:0003924; GTPase activity; molecular_function GO:0005525; GTP binding; molecular_function GO:0005622; intracellular; cellular_component GO:0007264; small GTPase mediated signal transduction; biological_process GO:0007049; cell cycle; biological_process}	{NA}
A00817	{CONTIG11:1498708:1499864:+}	{gi|646394841|gb|KDQ59214.1|; hypothetical protein [Jaapia argillacea MUCL 33604, JAAARDRAFT_33950]}	{P0C1I9; CYP11_RHIO9 Peptidyl-prolyl cis-trans isomerase cyp11 OS=Rhizopus delemar (strain RA 99-880 / ATCC MYA-4621 / FGSC 9543 / NRRL 43880) GN=cyp11 PE=3 SV=1}	{mrr:Moror_1236; K09566 PPIG peptidyl-prolyl isomerase G (cyclophilin G) 5.2.1.8 }	{Hs4758106_1; KOG0546 HSP90 co-chaperone CPR7/Cyclophilin O Posttranslational modification, protein turnover, chaperones ;}	{GO:0006457; protein folding; biological_process GO:0003755; peptidyl-prolyl cis-trans isomerase activity; molecular_function GO:0005576; NA}	{NA}
A00818	{CONTIG11:1499906:1501703:-}	{gi|568450221|ref|XP_006459198.1|; hypothetical protein AGABI2DRAFT_65545, partial [Agaricus bisporus var. bisporus H97]}	{NA}	{abv:AGABI2DRAFT65545; K03258 EIF4B translation initiation factor 4B -- Genetic Information Processing; Translation; RNA transport [PATH:ko03013] Environmental Information Processing; Signal transduction; mTOR signaling pathway [PATH:ko04150] Environmental Information Processing; Signal transduction; PI3K-Akt signaling pathway [PATH:ko04151] Human Diseases; Cancers; Proteoglycans in cancer [PATH:…	{NA}	{GO:0003676; nucleic acid binding; molecular_function}	{NA}
A00819	{CONTIG11:1501948:1504295:-}	{gi|598001671|ref|XP_007334776.1|; hypothetical protein [Agaricus bisporus var. burnettii JB137-S8, AGABI1DRAFT_133088]}	{NA}	{abp:AGABI1DRAFT133088; K21452 MBZ1 bZIP-type transcription factor MBZ1 -- }	{NA}	{GO:0006355; regulation of transcription, DNA-dependent; biological_process GO:0015035; protein disulfide oxidoreductase activity; molecular_function GO:0043565; sequence-specific DNA binding; molecular_function GO:0003700; sequence-specific DNA binding transcription factor activity; molecular_function}	{NA}
A00820	{CONTIG11:1508833:1509984:+}	{gi|568450191|ref|XP_006459188.1|; hypothetical protein [Agaricus bisporus var. bisporus H97, AGABI2DRAFT_116162]}	{NA}	{abv:AGABI2DRAFT116162; }	{NA}	{NA}	{NA}
A00821	{CONTIG11:1510588:1512006:+}	{gi|599411139|ref|XP_007403009.1|; hypothetical protein PHACADRAFT_58702, partial [Phanerochaete carnosa HHB-10118-sp]}	{NA}	{mpr:MPER_12920; }	{NA}	{GO:0003964; RNA-directed DNA polymerase activity; molecular_function GO:0003723; RNA binding; molecular_function GO:0006278; RNA-dependent DNA replication; biological_process}	{NA}
A00822	{CONTIG11:1515320:1516864:-}	{gi|598003127|ref|XP_007335104.1|; hypothetical protein [Agaricus bisporus var. burnettii JB137-S8, AGABI1DRAFT_48313]}	{NA}	{abp:AGABI1DRAFT47862; }	{NA}	{NA}	{NA}
A00823	{CONTIG11:1518797:1519906:+}	{NA}	{NA}	{NA}	{NA}	{NA}	{NA}
A00824	{CONTIG11:1520453:1521268:+}	{NA}	{NA}	{NA}	{NA}	{NA}	{NA}
A00825	{CONTIG11:1521396:1523622:-}	{gi|598002979|ref|XP_007335073.1|; hypothetical protein AGABI1DRAFT_48259, partial [Agaricus bisporus var. burnettii JB137-S8]}	{NA}	{abp:AGABI1DRAFT47862; }	{NA}	{GO:0006278; RNA-dependent DNA replication; biological_process GO:0003723; RNA binding; molecular_function GO:0003964; RNA-directed DNA polymerase activity; molecular_function}	{NA}
A00826	{CONTIG11:1524618:1526701:+}	{NA}	{NA}	{NA}	{NA}	{GO:0005681; spliceosomal complex; cellular_component GO:0000398; nuclear mRNA splicing, via spliceosome; biological_process}	{NA}
A00827	{CONTIG11:1526780:1528066:+}	{gi|568455664|ref|XP_006461008.1|; hypothetical protein [Agaricus bisporus var. bisporus H97, AGABI2DRAFT_117934]}	{NA}	{abv:AGABI2DRAFT117934; }	{NA}	{NA}	{NA}
A00828	{CONTIG11:1528627:1529994:+}	{gi|598002385|ref|XP_007334949.1|; hypothetical protein AGABI1DRAFT_48052, partial [Agaricus bisporus var. burnettii JB137-S8]}	{NA}	{abp:AGABI1DRAFT47765; }	{NA}	{GO:0006351; transcription, DNA-dependent; biological_process GO:0003899; DNA-directed RNA polymerase activity; molecular_function GO:0005634; nucleus; cellular_component}	{NA}
A00829	{CONTIG11:1540972:1542714:-}	{gi|598003467|ref|XP_007335180.1|; hypothetical protein [Agaricus bisporus var. burnettii JB137-S8, AGABI1DRAFT_133537]}	{NA}	{abv:AGABI2DRAFT121719; }	{NA}	{NA}	{NA}
A00830	{CONTIG11:1543409:1544754:-}	{gi|598002195|ref|XP_007334903.1|; hypothetical protein [Agaricus bisporus var. burnettii JB137-S8, AGABI1DRAFT_95622]}	{NA}	{abp:AGABI1DRAFT95622; }	{NA}	{NA}	{NA}
A00831	{CONTIG11:1545412:1547006:+}	{gi|568450140|ref|XP_006459171.1|; hypothetical protein [Agaricus bisporus var. bisporus H97, AGABI2DRAFT_116132]}	{NA}	{abv:AGABI2DRAFT116132; }	{NA}	{NA}	{NA}
A00832	{CONTIG11:1548559:1549185:+}	{NA}	{NA}	{NA}	{NA}	{NA}	{NA}
A00833	{CONTIG11:1549623:1550246:-}	{gi|598002965|ref|XP_007335070.1|; hypothetical protein [Agaricus bisporus var. burnettii JB137-S8, AGABI1DRAFT_48258]}	{NA}	{abv:AGABI2DRAFT58688; }	{NA}	{NA}	{NA}
A00834	{CONTIG11:1550771:1552525:-}	{gi|568450140|ref|XP_006459171.1|; hypothetical protein [Agaricus bisporus var. bisporus H97, AGABI2DRAFT_116132]}	{NA}	{abv:AGABI2DRAFT116132; }	{NA}	{NA}	{NA}
A00835	{CONTIG11:1553683:1555815:+}	{gi|568447700|ref|XP_006458364.1|; hypothetical protein [Agaricus bisporus var. bisporus H97, AGABI2DRAFT_176739]}	{NA}	{abv:AGABI2DRAFT176739; }	{NA}	{GO:0015074; DNA integration; biological_process}	{NA}
A00836	{CONTIG11:1556284:1558035:-}	{gi|568450140|ref|XP_006459171.1|; hypothetical protein [Agaricus bisporus var. bisporus H97, AGABI2DRAFT_116132]}	{NA}	{abv:AGABI2DRAFT116132; }	{NA}	{NA}	{NA}
A00837	{CONTIG11:1559854:1561653:-}	{gi|568452195|ref|XP_006459855.1|; hypothetical protein [Agaricus bisporus var. bisporus H97, AGABI2DRAFT_142267]}	{NA}	{abv:AGABI2DRAFT142267; }	{NA}	{NA}	{NA}
A00838	{CONTIG11:1561824:1564433:-}	{gi|598002007|ref|XP_007334859.1|; hypothetical protein [Agaricus bisporus var. burnettii JB137-S8, AGABI1DRAFT_47862]}	{NA}	{abp:AGABI1DRAFT47862; }	{NA}	{GO:0006278; RNA-dependent DNA replication; biological_process GO:0003723; RNA binding; molecular_function GO:0003964; RNA-directed DNA polymerase activity; molecular_function}	{NA}
A00839	{CONTIG11:1564559:1567546:-}	{gi|568440862|ref|XP_006456089.1|; hypothetical protein [Agaricus bisporus var. bisporus H97, AGABI2DRAFT_121998]}	{NA}	{abv:AGABI2DRAFT121998; }	{NA}	{GO:0005681; spliceosomal complex; cellular_component GO:0000398; nuclear mRNA splicing, via spliceosome; biological_process}	{NA}
A00840	{CONTIG11:1568011:1569540:+}	{gi|598002863|ref|XP_007335052.1|; hypothetical protein AGABI1DRAFT_48233, partial [Agaricus bisporus var. burnettii JB137-S8]}	{NA}	{mpr:MPER_12841; }	{NA}	{NA}	{NA}
A00841	{CONTIG11:1569846:1571453:-}	{gi|598002863|ref|XP_007335052.1|; hypothetical protein AGABI1DRAFT_48233, partial [Agaricus bisporus var. burnettii JB137-S8]}	{NA}	{mpr:MPER_12841; }	{NA}	{NA}	{NA}
A00842	{CONTIG11:1571652:1572761:+}	{gi|598002613|ref|XP_007334999.1|; hypothetical protein AGABI1DRAFT_48140, partial [Agaricus bisporus var. burnettii JB137-S8]}	{NA}	{abp:AGABI1DRAFT47753; }	{NA}	{GO:0006278; RNA-dependent DNA replication; biological_process GO:0003723; RNA binding; molecular_function GO:0003964; RNA-directed DNA polymerase activity; molecular_function}	{NA}
A00843	{CONTIG11:1575709:1577565:-}	{gi|568447700|ref|XP_006458364.1|; hypothetical protein [Agaricus bisporus var. bisporus H97, AGABI2DRAFT_176739]}	{NA}	{abv:AGABI2DRAFT176739; }	{NA}	{GO:0015074; DNA integration; biological_process}	{NA}
A00844	{CONTIG11:1578447:1579262:-}	{gi|568450140|ref|XP_006459171.1|; hypothetical protein [Agaricus bisporus var. bisporus H97, AGABI2DRAFT_116132]}	{NA}	{abv:AGABI2DRAFT116132; }	{NA}	{NA}	{NA}
A00845	{CONTIG11:1579815:1581568:-}	{gi|568450140|ref|XP_006459171.1|; hypothetical protein [Agaricus bisporus var. bisporus H97, AGABI2DRAFT_116132]}	{NA}	{abv:AGABI2DRAFT116132; }	{NA}	{NA}	{NA}
A00846	{CONTIG11:1581653:1582189:-}	{NA}	{NA}	{NA}	{NA}	{NA}	{NA}
A00847	{CONTIG11:1583581:1588148:-}	{gi|598002007|ref|XP_007334859.1|; hypothetical protein [Agaricus bisporus var. burnettii JB137-S8, AGABI1DRAFT_47862]}	{NA}	{abp:AGABI1DRAFT47862; }	{NA}	{GO:0006278; RNA-dependent DNA replication; biological_process GO:0003723; RNA binding; molecular_function GO:0003964; RNA-directed DNA polymerase activity; molecular_function}	{NA}
A00848	{CONTIG11:1588825:1589128:-}	{NA}	{NA}	{abp:AGABI1DRAFT131664; }	{NA}	{NA}	{NA}
A00849	{CONTIG11:1592430:1594512:-}	{gi|568459624|ref|XP_006462323.1|; hypothetical protein AGABI2DRAFT_47493, partial [Agaricus bisporus var. bisporus H97]}	{NA}	{abv:AGABI2DRAFT47493; }	{NA}	{NA}	{NA}
A00850	{CONTIG11:1596455:1597228:-}	{gi|568447661|ref|XP_006458351.1|; hypothetical protein AGABI2DRAFT_58703, partial [Agaricus bisporus var. bisporus H97]}	{NA}	{abv:AGABI2DRAFT58703; }	{NA}	{GO:0016407; acetyltransferase activity; molecular_function}	{NA}
A00851	{CONTIG11:1600385:1601956:-}	{gi|598006213|ref|XP_007335806.1|; hypothetical protein [Agaricus bisporus var. burnettii JB137-S8, AGABI1DRAFT_96225]}	{NA}	{abv:AGABI2DRAFT145078; }	{NA}	{NA}	{NA}
A00852	{CONTIG11:1604385:1605665:+}	{NA}	{NA}	{NA}	{NA}	{NA}	{NA}
A00853	{CONTIG12:474:1417:-}	{NA}	{NA}	{NA}	{NA}	{NA}	{NA}
A00854	{CONTIG12:28542:29911:-}	{gi|568451824|ref|XP_006459731.1|; hypothetical protein [Agaricus bisporus var. bisporus H97, AGABI2DRAFT_177555]}	{NA}	{abv:AGABI2DRAFT177555; }	{NA}	{NA}	{NA}
A00855	{CONTIG12:334435:336552:+}	{gi|597997019|ref|XP_007333656.1|; hypothetical protein [Agaricus bisporus var. burnettii JB137-S8, AGABI1DRAFT_116217]}	{O42947; YBPC_SCHPO Uncharacterized protein C16H5.12c OS=Schizosaccharomyces pombe (strain 972 / ATCC 24843) GN=SPBC16H5.12c PE=1 SV=3}	{abp:AGABI1DRAFT116217; }	{NA}	{GO:0016787; hydrolase activity; molecular_function}	{NA}
A00856	{CONTIG12:337846:343035:-}	{gi|597997023|ref|XP_007333657.1|; hypothetical protein [Agaricus bisporus var. burnettii JB137-S8, AGABI1DRAFT_79519]}	{O94666; RPC1_SCHPO DNA-directed RNA polymerase III subunit rpc1 OS=Schizosaccharomyces pombe (strain 972 / ATCC 24843) GN=rpc1 PE=2 SV=1}	{abp:AGABI1DRAFT79519; K03018 RPC1, POLR3A DNA-directed RNA polymerase III subunit RPC1 2.7.7.6 Metabolism; Nucleotide metabolism; Purine metabolism [PATH:ko00230] Metabolism; Nucleotide metabolism; Pyrimidine metabolism [PATH:ko00240] Genetic Information Processing; Transcription; RNA polymerase [PATH:ko03020] Organismal Systems; Immune system; Cytosolic DNA-sensing pathway [PATH:ko04623] Human …	{SPBC651.08c; KOG0261 RNA polymerase III, large subunit K Transcription ;}	{GO:0003677; DNA binding; molecular_function GO:0006351; transcription, DNA-dependent; biological_process GO:0003899; DNA-directed RNA polymerase activity; molecular_function}	{NA}
A00857	{CONTIG12:343431:344495:+}	{gi|597997027|ref|XP_007333658.1|; hypothetical protein [Agaricus bisporus var. burnettii JB137-S8, AGABI1DRAFT_116220]}	{NA}	{abp:AGABI1DRAFT116220; K12486 SMAP stromal membrane-associated protein -- Cellular Processes; Transport and catabolism; Endocytosis [PATH:ko04144] }	{NA}	{GO:0032312; regulation of ARF GTPase activity; biological_process GO:0008270; zinc ion binding; molecular_function GO:0008060; ARF GTPase activator activity; molecular_function}	{NA}
A00858	{CONTIG12:344809:345650:-}	{gi|568452090|ref|XP_006459820.1|; hypothetical protein AGABI1DRAFT_24554, partial [Agaricus bisporus var. burnettii JB137-S8]}	{NA}	{abp:AGABI1DRAFT24554; }	{NA}	{NA}	{NA}
A00859	{CONTIG12:345743:346845:+}	{gi|568452084|ref|XP_006459818.1|; 20S proteasome subunit [Agaricus bisporus var. bisporus H97]}	{Q9QUM9; PSA6_MOUSE Proteasome subunit alpha type-6 OS=Mus musculus GN=Psma6 PE=1 SV=1}	{abp:AGABI1DRAFT116221; K02730 PSMA6 20S proteasome subunit alpha 1 3.4.25.1 Genetic Information Processing; Folding, sorting and degradation; Proteasome [PATH:ko03050] }	{Hs14749945; KOG0182 20S proteasome, regulatory subunit alpha type PSMA6/SCL1 O Posttranslational modification, protein turnover, chaperones ;}	{GO:0051603; proteolysis involved in cellular protein catabolic process; biological_process GO:0005839; proteasome core complex; cellular_component GO:0004298; threonine-type endopeptidase activity; molecular_function}	{NA}
A00860	{CONTIG12:347365:349962:+}	{gi|568452087|ref|XP_006459819.1|; hypothetical protein [Agaricus bisporus var. bisporus H97, AGABI2DRAFT_184364]}	{O59711; LYS9_SCHPO Saccharopine dehydrogenase [NADP(+), L-glutamate-forming] OS=Schizosaccharomyces pombe (strain 972 / ATCC 24843) GN=lys9 PE=3 SV=1}	{abv:AGABI2DRAFT184364; }	{SPBC3B8.03; KOG0172 Lysine-ketoglutarate reductase/saccharopine dehydrogenase E Amino acid transport and metabolism ;}	{GO:0009089; lysine biosynthetic process via diaminopimelate; biological_process GO:0008152; NA GO:0050661; NADP binding; molecular_function GO:0016491; oxidoreductase activity; molecular_function GO:0008168; methyltransferase activity; molecular_function GO:0003824; NA GO:0016620; oxidoreductase activity, acting on the aldehyde or oxo group of donors, NAD or NADP as acceptor; molecular_function …	{NA}
A00861	{CONTIG12:350546:351738:+}	{gi|568452093|ref|XP_006459821.1|; hypothetical protein [Agaricus bisporus var. bisporus H97, AGABI2DRAFT_191660]}	{NA}	{abv:AGABI2DRAFT191660; }	{NA}	{GO:0016787; hydrolase activity; molecular_function}	{NA}
A00862	{CONTIG12:352220:353111:-}	{gi|568452102|ref|XP_006459824.1|; hypothetical protein [Agaricus bisporus]}	{P0CM55; CANB_CRYNB Calcineurin subunit B OS=Cryptococcus neoformans var. neoformans serotype D (strain B-3501A) GN=CNB1 PE=3 SV=1}	{abp:AGABI1DRAFT116228; K06268 PPP3R, CNB serine/threonine-protein phosphatase 2B regulatory subunit -- Environmental Information Processing; Signal transduction; MAPK signaling pathway [PATH:ko04010] Environmental Information Processing; Signal transduction; Calcium signaling pathway [PATH:ko04020] Environmental Information Processing; Signal transduction; cGMP - PKG signaling pathway [PATH:ko04…	{SPCC830.06; KOG0034 Ca2+/calmodulin-dependent protein phosphatase (calcineurin subunit B), EF-Hand superfamily protein T Signal transduction mechanisms ;}	{GO:0005578; proteinaceous extracellular matrix; cellular_component GO:0007165; signal transduction; biological_process GO:0005509; calcium ion binding; molecular_function}	{NA}
A00863	{CONTIG12:353167:354799:+}	{gi|597997039|ref|XP_007333661.1|; hypothetical protein [Agaricus bisporus var. burnettii JB137-S8, AGABI1DRAFT_131988]}	{NA}	{abp:AGABI1DRAFT131988; }	{NA}	{NA}	{NA}
A00864	{CONTIG12:356423:357913:-}	{gi|568447700|ref|XP_006458364.1|; hypothetical protein [Agaricus bisporus var. bisporus H97, AGABI2DRAFT_176739]}	{NA}	{abv:AGABI2DRAFT176739; }	{NA}	{GO:0015074; DNA integration; biological_process}	{NA}
A00865	{CONTIG12:32212:33408:+}	{gi|471908969|emb|CCO28169.1|; hypothetical protein [Rhizoctonia solani AG-1 IB, BN14_02162]}	{NA}	{NA}	{NA}	{NA}	{NA}
A00866	{CONTIG12:358583:359182:-}	{gi|598002669|ref|XP_007335013.1|; hypothetical protein [Agaricus bisporus var. burnettii JB137-S8, AGABI1DRAFT_48154]}	{NA}	{abv:AGABI2DRAFT116129; }	{NA}	{NA}	{NA}
A00867	{CONTIG12:359911:361044:-}	{gi|598005073|ref|XP_007335555.1|; hypothetical protein AGABI1DRAFT_96072, partial [Agaricus bisporus var. burnettii JB137-S8]}	{NA}	{abv:AGABI2DRAFT116132; }	{NA}	{NA}	{NA}
A00868	{CONTIG12:361534:362010:-}	{gi|598002965|ref|XP_007335070.1|; hypothetical protein [Agaricus bisporus var. burnettii JB137-S8, AGABI1DRAFT_48258]}	{NA}	{abv:AGABI2DRAFT58688; }	{NA}	{NA}	{NA}
A00869	{CONTIG12:362061:366054:-}	{gi|568447700|ref|XP_006458364.1|; hypothetical protein [Agaricus bisporus var. bisporus H97, AGABI2DRAFT_176739]}	{NA}	{abv:AGABI2DRAFT176739; }	{NA}	{GO:0005576; NA GO:0015074; DNA integration; biological_process GO:0005213; structural constituent of chorion; molecular_function GO:0007304; chorion-containing eggshell formation; biological_process GO:0042600; chorion; cellular_component}	{NA}
A00870	{CONTIG12:366187:366531:+}	{NA}	{NA}	{NA}	{NA}	{NA}	{NA}
A00871	{CONTIG12:369096:370334:-}	{gi|568447700|ref|XP_006458364.1|; hypothetical protein [Agaricus bisporus var. bisporus H97, AGABI2DRAFT_176739]}	{NA}	{abv:AGABI2DRAFT176739; }	{NA}	{NA}	{NA}
A00872	{CONTIG12:372937:373795:+}	{NA}	{NA}	{NA}	{NA}	{NA}	{NA}
A00873	{CONTIG12:376152:379409:+}	{gi|630224020|ref|XP_007859276.1|; gag-pol polyprotein [Moniliophthora roreri MCA 2997]}	{NA}	{NA}	{NA}	{GO:0015074; DNA integration; biological_process}	{NA}
A00874	{CONTIG12:380542:381521:+}	{gi|598003755|ref|XP_007335246.1|; hypothetical protein [Agaricus bisporus var. burnettii JB137-S8, AGABI1DRAFT_133618]}	{NA}	{abv:AGABI2DRAFT121727; }	{NA}	{NA}	{NA}
A00875	{CONTIG12:382936:386213:-}	{NA}	{NA}	{NA}	{NA}	{NA}	{NA}
A00876	{CONTIG12:33545:35018:+}	{gi|568451827|ref|XP_006459732.1|; hypothetical protein [Agaricus bisporus var. bisporus H97, AGABI2DRAFT_202095]}	{NA}	{abv:AGABI2DRAFT202095; }	{NA}	{NA}	{NA}
A00877	{CONTIG12:387369:387962:+}	{gi|598003847|ref|XP_007335269.1|; hypothetical protein [Agaricus bisporus var. burnettii JB137-S8, AGABI1DRAFT_109980]}	{NA}	{abv:AGABI2DRAFT116121; }	{NA}	{NA}	{NA}
A00878	{CONTIG12:388552:389682:-}	{gi|598002863|ref|XP_007335052.1|; hypothetical protein AGABI1DRAFT_48233, partial [Agaricus bisporus var. burnettii JB137-S8]}	{NA}	{abv:AGABI2DRAFT58688; }	{NA}	{NA}	{NA}
A00879	{CONTIG12:393468:398125:+}	{gi|646297804|gb|KDQ18961.1|; hypothetical protein BOTBODRAFT_91579, partial [Botryobasidium botryosum FD-172 SS1]}	{NA}	{NA}	{NA}	{GO:0008270; zinc ion binding; molecular_function GO:0003676; nucleic acid binding; molecular_function}	{NA}
A00880	{CONTIG12:402506:403630:+}	{gi|597991921|ref|XP_007332429.1|; hypothetical protein [Agaricus bisporus var. burnettii JB137-S8, AGABI1DRAFT_130835]}	{NA}	{abp:AGABI1DRAFT130835; }	{NA}	{GO:0003676; nucleic acid binding; molecular_function GO:0008270; zinc ion binding; molecular_function}	{NA}
A00881	{CONTIG12:404193:405551:+}	{gi|599411139|ref|XP_007403009.1|; hypothetical protein PHACADRAFT_58702, partial [Phanerochaete carnosa HHB-10118-sp]}	{NA}	{mpr:MPER_12920; }	{NA}	{GO:0006278; RNA-dependent DNA replication; biological_process GO:0003723; RNA binding; molecular_function GO:0003964; RNA-directed DNA polymerase activity; molecular_function}	{NA}
A00882	{CONTIG12:407154:408506:+}	{gi|568447661|ref|XP_006458351.1|; hypothetical protein AGABI2DRAFT_58703, partial [Agaricus bisporus var. bisporus H97]}	{NA}	{abv:AGABI2DRAFT58703; }	{NA}	{GO:0015074; DNA integration; biological_process}	{NA}
A00883	{CONTIG12:409115:409876:+}	{NA}	{NA}	{NA}	{NA}	{NA}	{NA}
A00884	{CONTIG12:413125:416836:-}	{gi|238576827|ref|XP_002388175.1|; hypothetical protein [Moniliophthora perniciosa FA553, MPER_12841]}	{NA}	{mpr:MPER_12841; }	{NA}	{GO:0015074; DNA integration; biological_process}	{NA}
A00885	{CONTIG12:416933:417292:-}	{gi|598007273|ref|XP_007336153.1|; hypothetical protein AGABI1DRAFT_135355, partial [Agaricus bisporus var. burnettii JB137-S8]}	{NA}	{abv:AGABI2DRAFT63009; }	{NA}	{NA}	{NA}
A00886	{CONTIG12:428382:428735:+}	{gi|648152091|gb|KDR65950.1|; hypothetical protein GALMADRAFT_24820, partial [Galerina marginata CBS 339.88]}	{NA}	{mpr:MPER_07794; }	{NA}	{NA}	{NA}
A00887	{CONTIG12:35280:37435:-}	{gi|648160761|gb|KDR74476.1|; hypothetical protein [Galerina marginata CBS 339.88, GALMADRAFT_250447]}	{P0CP27; NOP58_CRYNB Nucleolar protein 58 OS=Cryptococcus neoformans var. neoformans serotype D (strain B-3501A) GN=NOP58 PE=3 SV=1}	{cput:CONPUDRAFT_136949; K14565 NOP58 nucleolar protein 58 -- Genetic Information Processing; Translation; Ribosome biogenesis in eukaryotes [PATH:ko03008] }	{At3g05060; KOG2572 Ribosome biogenesis protein - Nop58p/Nop5p AJ RNA processing and modification ; Translation, ribosomal structure and biogenesis ;}	{NA}	{NA}
A00888	{CONTIG12:428823:429605:+}	{gi|691784738|emb|CDO77880.1|; hypothetical protein [Trametes cinnabarina, BN946_scf184690.g1]}	{NA}	{NA}	{NA}	{GO:0006278; RNA-dependent DNA replication; biological_process GO:0003964; RNA-directed DNA polymerase activity; molecular_function GO:0003723; RNA binding; molecular_function}	{NA}
A00889	{CONTIG12:430846:431454:+}	{NA}	{NA}	{hir:HETIRDRAFT_247623; }	{NA}	{NA}	{NA}
A00890	{CONTIG12:432156:432740:+}	{NA}	{NA}	{NA}	{NA}	{NA}	{NA}
A00891	{CONTIG12:433880:434842:+}	{gi|568450191|ref|XP_006459188.1|; hypothetical protein [Agaricus bisporus var. bisporus H97, AGABI2DRAFT_116162]}	{NA}	{abv:AGABI2DRAFT116162; }	{NA}	{GO:0003676; nucleic acid binding; molecular_function GO:0008270; zinc ion binding; molecular_function}	{NA}
A00892	{CONTIG12:435721:436911:+}	{gi|238576636|ref|XP_002388106.1|; hypothetical protein [Moniliophthora perniciosa FA553, MPER_12920]}	{NA}	{mpr:MPER_12920; }	{NA}	{GO:0006278; RNA-dependent DNA replication; biological_process GO:0003964; RNA-directed DNA polymerase activity; molecular_function GO:0003723; RNA binding; molecular_function}	{NA}
A00893	{CONTIG12:439116:440042:+}	{NA}	{NA}	{NA}	{NA}	{NA}	{NA}
A00894	{CONTIG12:441508:441849:-}	{gi|336362522|gb|EGN91319.1|; hypothetical protein [Serpula lacrymans var. lacrymans S7.3, SERLA73DRAFT_157576]}	{P31843; RRPO_OENBE RNA-directed DNA polymerase homolog OS=Oenothera berteroana PE=4 SV=1}	{mpr:MPER_00477; }	{NA}	{GO:0007010; cytoskeleton organization; biological_process GO:0005737; cytoplasm; cellular_component GO:0003779; actin binding; molecular_function}	{NA}
A00895	{CONTIG12:442814:443689:-}	{gi|597981189|ref|XP_007329829.1|; hypothetical protein [Agaricus bisporus var. burnettii JB137-S8, AGABI1DRAFT_128223]}	{NA}	{abp:AGABI1DRAFT128223; }	{NA}	{NA}	{NA}
A00896	{CONTIG12:446179:446574:+}	{gi|598007137|ref|XP_007336119.1|; hypothetical protein AGABI1DRAFT_135259, partial [Agaricus bisporus var. burnettii JB137-S8]}	{NA}	{abv:AGABI2DRAFT116129; }	{NA}	{NA}	{NA}
A00897	{CONTIG12:454718:456434:+}	{gi|597985643|ref|XP_007330913.1|; hypothetical protein [Agaricus bisporus var. burnettii JB137-S8, AGABI1DRAFT_129327]}	{NA}	{abp:AGABI1DRAFT129327; }	{NA}	{GO:0016853; isomerase activity; molecular_function}	{NA}
A00898	{CONTIG12:38211:38781:+}	{gi|630187962|ref|XP_007847566.1|; serine carboxypeptidase [Moniliophthora roreri MCA 2997]}	{NA}	{mrr:Moror_8831; }	{NA}	{GO:0004185; serine-type carboxypeptidase activity; molecular_function GO:0006508; proteolysis; biological_process}	{NA}
A00899	{CONTIG12:459905:460531:-}	{NA}	{NA}	{NA}	{NA}	{NA}	{NA}
A00900	{CONTIG12:461644:462108:-}	{gi|568447661|ref|XP_006458351.1|; hypothetical protein AGABI2DRAFT_58703, partial [Agaricus bisporus var. bisporus H97]}	{NA}	{abv:AGABI2DRAFT58703; }	{NA}	{GO:0015074; DNA integration; biological_process}	{NA}
A00901	{CONTIG12:462748:464064:-}	{gi|238581907|ref|XP_002389762.1|; hypothetical protein [Moniliophthora perniciosa FA553, MPER_11066]}	{NA}	{mpr:MPER_11066; }	{NA}	{NA}	{NA}
A00902	{CONTIG12:464634:465521:-}	{gi|568450191|ref|XP_006459188.1|; hypothetical protein [Agaricus bisporus var. bisporus H97, AGABI2DRAFT_116162]}	{NA}	{abv:AGABI2DRAFT116162; }	{NA}	{GO:0003676; nucleic acid binding; molecular_function GO:0008270; zinc ion binding; molecular_function}	{NA}
A00903	{CONTIG12:470477:482523:-}	{NA}	{NA}	{NA}	{NA}	{GO:0031514; motile cilium; cellular_component GO:0005524; ATP binding; molecular_function GO:0048870; cell motility; biological_process GO:0005516; calmodulin binding; molecular_function GO:0006298; mismatch repair; biological_process GO:0030983; mismatched DNA binding; molecular_function}	{NA}
A00904	{CONTIG12:482992:484964:+}	{gi|302680242|ref|XP_003029803.1|; hypothetical protein SCHCODRAFT_111512, partial [Schizophyllum commune]}	{NA}	{scm:SCHCODRAFT_111512; }	{NA}	{GO:0006629; lipid metabolic process; biological_process GO:0016717; oxidoreductase activity, acting on paired donors, with oxidation of a pair of donors resulting in the reduction of molecular oxygen to two molecules of water; molecular_function GO:0055114; oxidation-reduction process; biological_process}	{NA}
A00905	{CONTIG12:485573:488456:-}	{gi|646301089|gb|KDQ22240.1|; hypothetical protein [Pleurotus ostreatus PC15, PLEOSDRAFT_1086950]}	{NA}	{gtr:GLOTRDRAFT_78464; }	{NA}	{NA}	{NA}
A00906	{CONTIG12:489859:490800:-}	{NA}	{NA}	{NA}	{NA}	{NA}	{NA}
A00907	{CONTIG12:490844:492835:-}	{gi|568464365|ref|XP_006463884.1|; hypothetical protein [Agaricus bisporus var. bisporus H97, AGABI2DRAFT_120671]}	{NA}	{abv:AGABI2DRAFT120671; }	{NA}	{NA}	{NA}
A00908	{CONTIG12:492950:493548:+}	{NA}	{NA}	{NA}	{NA}	{GO:0030170; pyridoxal phosphate binding; molecular_function}	{NA}
A00909	{CONTIG12:40700:42120:+}	{gi|597973031|ref|XP_007327842.1|; hypothetical protein [Agaricus bisporus var. burnettii JB137-S8, AGABI1DRAFT_119076]}	{NA}	{abp:AGABI1DRAFT119076; }	{NA}	{NA}	{NA}
A00910	{CONTIG12:496267:499529:-}	{gi|597996535|ref|XP_007333535.1|; hypothetical protein [Agaricus bisporus var. burnettii JB137-S8, AGABI1DRAFT_79354]}	{NA}	{abp:AGABI1DRAFT79354; }	{NA}	{GO:0003676; nucleic acid binding; molecular_function GO:0046872; metal ion binding; molecular_function}	{NA}
A00911	{CONTIG12:504415:504823:-}	{gi|568464344|ref|XP_006463877.1|; hypothetical protein [Agaricus bisporus var. bisporus H97, AGABI2DRAFT_194563]}	{NA}	{abp:AGABI1DRAFT116134; }	{NA}	{NA}	{NA}
A00912	{CONTIG12:504928:506800:+}	{gi|568464341|ref|XP_006463876.1|; hypothetical protein [Agaricus bisporus]}	{O13639; SAHH_SCHPO Adenosylhomocysteinase OS=Schizosaccharomyces pombe (strain 972 / ATCC 24843) GN=pi047 PE=3 SV=1}	{abp:AGABI1DRAFT87567; K01251 E3.3.1.1, ahcY adenosylhomocysteinase 3.3.1.1 Metabolism; Amino acid metabolism; Cysteine and methionine metabolism [PATH:ko00270] }	{SPBC8D2.18c; KOG1370 S-adenosylhomocysteine hydrolase H Coenzyme transport and metabolism ;}	{GO:0048037; cofactor binding; molecular_function GO:0006813; potassium ion transport; biological_process GO:0016616; oxidoreductase activity, acting on the CH-OH group of donors, NAD or NADP as acceptor; molecular_function GO:0004455; ketol-acid reductoisomerase activity; molecular_function GO:0008652; cellular amino acid biosynthetic process; biological_process GO:0004013; adenosylhomocysteinas…	{NA}
A00913	{CONTIG12:509929:512816:+}	{NA}	{NA}	{NA}	{NA}	{GO:0005515; protein binding; molecular_function}	{NA}
A00914	{CONTIG12:514924:516813:-}	{gi|568464325|ref|XP_006463871.1|; hypothetical protein [Agaricus bisporus var. bisporus H97, AGABI2DRAFT_225819]}	{O13639; SAHH_SCHPO Adenosylhomocysteinase OS=Schizosaccharomyces pombe (strain 972 / ATCC 24843) GN=pi047 PE=3 SV=1}	{abv:AGABI2DRAFT225819; K01251 E3.3.1.1, ahcY adenosylhomocysteinase 3.3.1.1 Metabolism; Amino acid metabolism; Cysteine and methionine metabolism [PATH:ko00270] }	{SPBC8D2.18c; KOG1370 S-adenosylhomocysteine hydrolase H Coenzyme transport and metabolism ;}	{GO:0055114; oxidation-reduction process; biological_process GO:0004013; adenosylhomocysteinase activity; molecular_function GO:0008652; cellular amino acid biosynthetic process; biological_process GO:0004455; ketol-acid reductoisomerase activity; molecular_function GO:0016616; oxidoreductase activity, acting on the CH-OH group of donors, NAD or NADP as acceptor; molecular_function GO:0006813; po…	{NA}
A00915	{CONTIG12:517684:520565:+}	{gi|568464322|ref|XP_006463870.1|; hypothetical protein [Agaricus bisporus var. bisporus H97, AGABI2DRAFT_180066]}	{NA}	{abv:AGABI2DRAFT180066; K18757 LARP1 la-related protein 1 -- }	{NA}	{NA}	{NA}
A00916	{CONTIG12:522178:522626:-}	{NA}	{NA}	{NA}	{NA}	{NA}	{NA}
A00917	{CONTIG12:527261:527587:-}	{NA}	{NA}	{NA}	{NA}	{NA}	{NA}
A00918	{CONTIG12:530581:532524:+}	{gi|597965889|ref|XP_007325884.1|; hypothetical protein [Agaricus bisporus var. burnettii JB137-S8, AGABI1DRAFT_88980]}	{NA}	{abp:AGABI1DRAFT88980; }	{NA}	{NA}	{NA}
A00919	{CONTIG12:534319:535488:+}	{gi|597991479|ref|XP_007332323.1|; hypothetical protein [Agaricus bisporus var. burnettii JB137-S8, AGABI1DRAFT_93686]}	{NA}	{abp:AGABI1DRAFT93686; }	{NA}	{GO:0035434; copper ion transmembrane transport; biological_process GO:0005375; copper ion transmembrane transporter activity; molecular_function GO:0003676; nucleic acid binding; molecular_function GO:0016021; integral to membrane; cellular_component GO:0008270; zinc ion binding; molecular_function}	{NA}
A00920	{CONTIG12:42907:44238:+}	{gi|568437162|ref|XP_006454860.1|; hypothetical protein [Agaricus bisporus var. bisporus H97, AGABI2DRAFT_198526]}	{NA}	{abv:AGABI2DRAFT198526; }	{NA}	{GO:0016021; integral to membrane; cellular_component GO:0055085; transmembrane transport; biological_process}	{NA}
A00921	{CONTIG12:535749:538934:+}	{gi|630225320|ref|XP_007859699.1|; hypothetical protein [Moniliophthora roreri MCA 2997, Moror_7616]}	{NA}	{mrr:Moror_17137; }	{NA}	{GO:0015074; DNA integration; biological_process GO:0006278; RNA-dependent DNA replication; biological_process GO:0003723; RNA binding; molecular_function GO:0003964; RNA-directed DNA polymerase activity; molecular_function}	{NA}
A00922	{CONTIG12:540874:543396:+}	{gi|170102565|ref|XP_001882498.1|; retrovirus-related pol polyprotein [Laccaria bicolor S238N-H82]}	{NA}	{lbc:LACBIDRAFT_299655; }	{NA}	{GO:0015074; DNA integration; biological_process}	{NA}
A00923	{CONTIG12:543679:544255:-}	{NA}	{NA}	{NA}	{NA}	{NA}	{NA}
A00924	{CONTIG12:545505:546257:+}	{gi|568439377|ref|XP_006455595.1|; hypothetical protein [Agaricus bisporus var. bisporus H97, AGABI2DRAFT_121497]}	{NA}	{abv:AGABI2DRAFT121497; }	{NA}	{NA}	{NA}
A00925	{CONTIG12:546991:548946:-}	{gi|597996579|ref|XP_007333546.1|; hypothetical protein [Agaricus bisporus var. burnettii JB137-S8, AGABI1DRAFT_116139]}	{NA}	{abp:AGABI1DRAFT116139; }	{NA}	{NA}	{NA}
A00926	{CONTIG12:549216:552316:+}	{gi|597996473|ref|XP_007333520.1|; hypothetical protein [Agaricus bisporus var. burnettii JB137-S8, AGABI1DRAFT_63993]}	{NA}	{abp:AGABI1DRAFT63993; }	{NA}	{GO:0050662; coenzyme binding; molecular_function GO:0006355; regulation of transcription, DNA-dependent; biological_process GO:0016491; oxidoreductase activity; molecular_function GO:0009058; biosynthetic process; biological_process GO:0003700; sequence-specific DNA binding transcription factor activity; molecular_function GO:0003723; RNA binding; molecular_function GO:0006694; steroid biosynthe…	{NA}
A00927	{CONTIG12:553263:555784:-}	{gi|597989213|ref|XP_007331781.1|; hypothetical protein [Agaricus bisporus var. burnettii JB137-S8, AGABI1DRAFT_130203]}	{NA}	{abp:AGABI1DRAFT130203; }	{NA}	{GO:0043531; ADP binding; molecular_function}	{NA}
A00928	{CONTIG12:559898:561701:+}	{gi|597996587|ref|XP_007333548.1|; hypothetical protein [Agaricus bisporus var. burnettii JB137-S8, AGABI1DRAFT_79378]}	{NA}	{abp:AGABI1DRAFT79378; }	{NA}	{NA}	{NA}
A00929	{CONTIG12:561809:563266:-}	{gi|648158747|gb|KDR72483.1|; hypothetical protein [Galerina marginata CBS 339.88, GALMADRAFT_73843]}	{NA}	{cci:CC1G_10894; }	{NA}	{GO:0016117; carotenoid biosynthetic process; biological_process GO:0016491; oxidoreductase activity; molecular_function GO:0006813; potassium ion transport; biological_process GO:0008033; tRNA processing; biological_process GO:0016705; oxidoreductase activity, acting on paired donors, with incorporation or reduction of molecular oxygen; molecular_function GO:0050660; flavin adenine dinucleotide …	{NA}
A00930	{CONTIG12:563359:565101:+}	{gi|597996591|ref|XP_007333549.1|; hypothetical protein [Agaricus bisporus var. burnettii JB137-S8, AGABI1DRAFT_94596]}	{NA}	{abp:AGABI1DRAFT94596; }	{NA}	{GO:0000921; septin ring assembly; biological_process GO:0016021; integral to membrane; cellular_component GO:0005940; septin ring; cellular_component GO:0045502; dynein binding; molecular_function GO:0008134; transcription factor binding; molecular_function GO:0042803; protein homodimerization activity; molecular_function GO:0006914; autophagy; biological_process GO:0019905; syntaxin binding; mo…	{NA}
A00931	{CONTIG12:48730:50431:+}	{gi|568451842|ref|XP_006459737.1|; hypothetical protein [Agaricus bisporus var. bisporus H97, AGABI2DRAFT_191595]}	{NA}	{abv:AGABI2DRAFT191595; }	{NA}	{NA}	{NA}
A00932	{CONTIG12:570156:573835:+}	{gi|568460969|ref|XP_006462769.1|; hypothetical protein [Agaricus bisporus var. bisporus H97, AGABI2DRAFT_119611]}	{NA}	{abv:AGABI2DRAFT146157; }	{NA}	{GO:0003723; RNA binding; molecular_function GO:0019079; viral genome replication; biological_process GO:0003724; RNA helicase activity; molecular_function GO:0043531; ADP binding; molecular_function}	{NA}
A00933	{CONTIG12:574922:578225:-}	{gi|597996603|ref|XP_007333552.1|; hypothetical protein [Agaricus bisporus var. burnettii JB137-S8, AGABI1DRAFT_122962]}	{NA}	{abp:AGABI1DRAFT122962; }	{NA}	{NA}	{NA}
A00934	{CONTIG12:579210:580784:-}	{gi|568464286|ref|XP_006463858.1|; hypothetical protein [Agaricus bisporus var. bisporus H97, AGABI2DRAFT_138136]}	{NA}	{abv:AGABI2DRAFT138136; }	{NA}	{GO:0005515; protein binding; molecular_function}	{NA}
A00935	{CONTIG12:586429:588102:+}	{gi|597996611|ref|XP_007333554.1|; hypothetical protein [Agaricus bisporus var. burnettii JB137-S8, AGABI1DRAFT_116147]}	{NA}	{abp:AGABI1DRAFT116147; K01183 E3.2.1.14 chitinase 3.2.1.14 Metabolism; Carbohydrate metabolism; Amino sugar and nucleotide sugar metabolism [PATH:ko00520] }	{NA}	{GO:0005975; carbohydrate metabolic process; biological_process GO:0004553; hydrolase activity, hydrolyzing O-glycosyl compounds; molecular_function}	{ABB90389.1_GH18; {chitinase;--;Taiwanofungus camphoratus;B7NZY9} chitinase (EC 3.2.1.14); lysozyme (EC 3.2.1.17); endo-&beta;-N-acetylglucosaminidase (EC 3.2.1.96); peptidoglycan hydrolase with endo-&beta;-N-acetylglucosaminidase specificity (EC 3.2.1.-); Nod factor hydrolase (EC 3.2.1.-); xylanase inhibitor; concanavalin B; narbonin Contains chitinases of classes III and V. Contains non-catalyt…
A00936	{CONTIG12:588555:590411:+}	{gi|568464280|ref|XP_006463856.1|; hypothetical protein [Agaricus bisporus]}	{Q54EW1; GLYC2_DICDI Serine hydroxymethyltransferase 2 OS=Dictyostelium discoideum GN=shmt2 PE=3 SV=1}	{abp:AGABI1DRAFT87584; K00600 glyA, SHMT glycine hydroxymethyltransferase 2.1.2.1 Metabolism; Amino acid metabolism; Glycine, serine and threonine metabolism [PATH:ko00260] Metabolism; Metabolism of other amino acids; Cyanoamino acid metabolism [PATH:ko00460] Metabolism; Carbohydrate metabolism; Glyoxylate and dicarboxylate metabolism [PATH:ko00630] Metabolism; Metabolism of cofactors and vitamin…	{At4g13930; KOG2467 Glycine/serine hydroxymethyltransferase E Amino acid transport and metabolism ;}	{GO:0006563; L-serine metabolic process; biological_process GO:0009058; biosynthetic process; biological_process GO:0030170; pyridoxal phosphate binding; molecular_function GO:0004372; glycine hydroxymethyltransferase activity; molecular_function GO:0016829; lyase activity; molecular_function GO:0006520; cellular amino acid metabolic process; biological_process GO:0006544; glycine metabolic proce…	{NA}
A00937	{CONTIG12:596113:598647:-}	{gi|568464271|ref|XP_006463853.1|; hypothetical protein [Agaricus bisporus var. bisporus H97, AGABI2DRAFT_120647]}	{NA}	{abv:AGABI2DRAFT120647; }	{NA}	{NA}	{NA}
A00938	{CONTIG12:604169:608570:+}	{gi|597996631|ref|XP_007333559.1|; hypothetical protein [Agaricus bisporus var. burnettii JB137-S8, AGABI1DRAFT_109188]}	{NA}	{abp:AGABI1DRAFT109188; }	{NA}	{NA}	{NA}
A00939	{CONTIG12:614231:616539:-}	{gi|568464262|ref|XP_006463850.1|; hypothetical protein [Agaricus bisporus var. bisporus H97, AGABI2DRAFT_74440]}	{NA}	{abv:AGABI2DRAFT74440; }	{NA}	{GO:0004672; protein kinase activity; molecular_function GO:0006468; protein phosphorylation; biological_process GO:0005524; ATP binding; molecular_function}	{NA}
A00940	{CONTIG12:625621:627806:+}	{NA}	{NA}	{NA}	{NA}	{NA}	{NA}
A00941	{CONTIG12:633336:635737:-}	{gi|568464253|ref|XP_006463847.1|; Fet3 ferroxidase, partial [Agaricus bisporus var. bisporus H97]}	{NA}	{abp:AGABI1DRAFT79402; K19791 FET3_5 iron transport multicopper oxidase -- }	{NA}	{GO:0016491; oxidoreductase activity; molecular_function GO:0005524; ATP binding; molecular_function GO:0055114; oxidation-reduction process; biological_process GO:0005507; copper ion binding; molecular_function GO:0006810; transport; biological_process}	{AFV15793.1_AA1; {laccase (Lcc9);--;Leucoagaricus gongylophorus Ae322;--} Laccase / p-diphenol:oxygen oxidoreductase / ferroxidase (EC 1.10.3.2); ; ferroxidase (EC 1.10.3.-); Laccase-like multicopper oxidase (EC 1.10.3.-) The characterized AA1 enzymes are multicopper oxidases that use diphenols and related substances as donors with oxygen as the acceptor. The AA1 family is currently divided into …
A00942	{CONTIG12:52929:53551:+}	{gi|597973023|ref|XP_007327840.1|; hypothetical protein [Agaricus bisporus var. burnettii JB137-S8, AGABI1DRAFT_112232]}	{NA}	{abp:AGABI1DRAFT112232; }	{NA}	{NA}	{NA}
A00943	{CONTIG12:636322:638013:+}	{gi|597996403|ref|XP_007333502.1|; hypothetical protein AGABI1DRAFT_12136, partial [Agaricus bisporus var. burnettii JB137-S8]}	{P40088; FTR1_YEAST Plasma membrane iron permease OS=Saccharomyces cerevisiae (strain ATCC 204508 / S288c) GN=FTR1 PE=1 SV=1}	{abp:AGABI1DRAFT12136; K07243 FTR, FTH1, efeU high-affinity iron transporter -- }	{NA}	{GO:0016020; membrane; cellular_component GO:0055085; transmembrane transport; biological_process}	{NA}
A00944	{CONTIG12:643006:644255:+}	{gi|568464247|ref|XP_006463845.1|; hypothetical protein [Agaricus bisporus var. bisporus H97, AGABI2DRAFT_194534]}	{NA}	{abv:AGABI2DRAFT194534; }	{NA}	{NA}	{NA}
A00945	{CONTIG12:647395:649536:-}	{gi|568464237|ref|XP_006463842.1|; hypothetical protein [Agaricus bisporus var. bisporus H97, AGABI2DRAFT_187306]}	{NA}	{abv:AGABI2DRAFT187306; }	{NA}	{GO:0031083; BLOC-1 complex; cellular_component GO:0030133; transport vesicle; cellular_component GO:0005515; protein binding; molecular_function}	{NA}
A00946	{CONTIG12:650196:652364:-}	{gi|597996477|ref|XP_007333521.1|; hypothetical protein [Agaricus bisporus var. burnettii JB137-S8, AGABI1DRAFT_64030]}	{NA}	{abp:AGABI1DRAFT64030; K08994 yneE, BEST ion channel-forming bestrophin family protein -- }	{NA}	{NA}	{NA}
A00947	{CONTIG12:653613:655802:-}	{gi|568464234|ref|XP_006463841.1|; hypothetical protein [Agaricus bisporus var. bisporus H97, AGABI2DRAFT_225771]}	{NA}	{abv:AGABI2DRAFT225771; K08994 yneE, BEST ion channel-forming bestrophin family protein -- }	{NA}	{NA}	{NA}
A00948	{CONTIG12:657082:659239:-}	{gi|299756841|ref|XP_001829619.2|; hypothetical protein [Coprinopsis cinerea okayama7#130, CC1G_08774]}	{NA}	{cci:CC1G_08774; K08994 yneE, BEST ion channel-forming bestrophin family protein -- }	{NA}	{GO:0016021; integral to membrane; cellular_component}	{NA}
A00949	{CONTIG12:661815:664065:+}	{gi|597996667|ref|XP_007333568.1|; hypothetical protein [Agaricus bisporus var. burnettii JB137-S8, AGABI1DRAFT_116163]}	{Q04792; DCE_YEAST Glutamate decarboxylase OS=Saccharomyces cerevisiae (strain ATCC 204508 / S288c) GN=GAD1 PE=1 SV=1}	{abp:AGABI1DRAFT116163; K01580 E4.1.1.15, gadB, gadA, GAD glutamate decarboxylase 4.1.1.15 Metabolism; Amino acid metabolism; Alanine, aspartate and glutamate metabolism [PATH:ko00250] Metabolism; Metabolism of other amino acids; beta-Alanine metabolism [PATH:ko00410] Metabolism; Metabolism of other amino acids; Taurine and hypotaurine metabolism [PATH:ko00430] Metabolism; Carbohydrate metabolism…	{YMR250w; KOG1383 Glutamate decarboxylase/sphingosine phosphate lyase E Amino acid transport and metabolism ;}	{GO:0016831; carboxy-lyase activity; molecular_function GO:0019752; carboxylic acid metabolic process; biological_process GO:0030170; pyridoxal phosphate binding; molecular_function}	{NA}
A00950	{CONTIG12:664359:667276:-}	{gi|568464228|ref|XP_006463839.1|; hypothetical protein [Agaricus bisporus var. bisporus H97, AGABI2DRAFT_120636]}	{NA}	{abv:AGABI2DRAFT120636; }	{NA}	{GO:0055085; transmembrane transport; biological_process GO:0016021; integral to membrane; cellular_component GO:0006629; lipid metabolic process; biological_process}	{NA}
A00951	{CONTIG12:667973:670351:-}	{gi|597996481|ref|XP_007333522.1|; hypothetical protein [Agaricus bisporus var. burnettii JB137-S8, AGABI1DRAFT_64036]}	{O59945; FIMB_SCHPO Fimbrin OS=Schizosaccharomyces pombe (strain 972 / ATCC 24843) GN=fim1 PE=1 SV=1}	{abp:AGABI1DRAFT64036; K17275 PLS1 plastin-1 -- }	{SPBC1778.06c; KOG0046 Ca2+-binding actin-bundling protein (fimbrin/plastin), EF-Hand protein superfamily Z Cytoskeleton ;}	{GO:0005515; protein binding; molecular_function}	{NA}
A00952	{CONTIG12:679680:681029:-}	{NA}	{NA}	{NA}	{NA}	{NA}	{NA}
A00953	{CONTIG12:57197:58000:-}	{gi|597990315|ref|XP_007332041.1|; hypothetical protein [Agaricus bisporus var. burnettii JB137-S8, AGABI1DRAFT_130486]}	{NA}	{abp:AGABI1DRAFT130486; }	{NA}	{NA}	{NA}
A00954	{CONTIG12:685978:689283:+}	{gi|568464207|ref|XP_006463832.1|; hypothetical protein [Agaricus bisporus var. bisporus H97, AGABI2DRAFT_152889]}	{NA}	{abv:AGABI2DRAFT152889; }	{NA}	{GO:0016020; membrane; cellular_component GO:0005747; mitochondrial respiratory chain complex I; cellular_component GO:0015205; nucleobase transmembrane transporter activity; molecular_function GO:0005739; mitochondrion; cellular_component GO:0015851; nucleobase transport; biological_process GO:0022900; electron transport chain; biological_process}	{NA}
A00955	{CONTIG12:689898:690713:+}	{gi|597996703|ref|XP_007333577.1|; hypothetical protein AGABI1DRAFT_116167, partial [Agaricus bisporus var. burnettii JB137-S8]}	{P04907; GSTF3_MAIZE Glutathione S-transferase 3 OS=Zea mays GN=GST3 PE=1 SV=4}	{abp:AGABI1DRAFT116167; K00799 GST, gst glutathione S-transferase 2.5.1.18 Metabolism; Metabolism of other amino acids; Glutathione metabolism [PATH:ko00480] Metabolism; Xenobiotics biodegradation and metabolism; Metabolism of xenobiotics by cytochrome P450 [PATH:ko00980] Metabolism; Xenobiotics biodegradation and metabolism; Drug metabolism - cytochrome P450 [PATH:ko00982] Human Diseases; Drug r…	{At1g02930; KOG0867 Glutathione S-transferase O Posttranslational modification, protein turnover, chaperones ;}	{GO:0005515; protein binding; molecular_function}	{NA}
A00956	{CONTIG12:692031:698445:+}	{gi|597964385|ref|XP_007325132.1|; hypothetical protein [Agaricus bisporus var. burnettii JB137-S8, AGABI1DRAFT_66408]}	{NA}	{abp:AGABI1DRAFT66408; }	{NA}	{GO:0055085; transmembrane transport; biological_process GO:0006810; transport; biological_process GO:0043462; regulation of ATPase activity; biological_process GO:0005524; ATP binding; molecular_function GO:0016887; ATPase activity; molecular_function GO:0042626; ATPase activity, coupled to transmembrane movement of substances; molecular_function GO:0019083; viral transcription; biological_proce…	{NA}
A00957	{CONTIG12:707392:708555:-}	{gi|597996711|ref|XP_007333579.1|; hypothetical protein [Agaricus bisporus var. burnettii JB137-S8, AGABI1DRAFT_116169]}	{NA}	{abv:AGABI2DRAFT194524; K13344 PEX13 peroxin-13 -- Cellular Processes; Transport and catabolism; Peroxisome [PATH:ko04146] }	{NA}	{GO:0005777; peroxisome; cellular_component GO:0008134; transcription factor binding; molecular_function GO:0019904; protein domain specific binding; molecular_function GO:0016560; protein import into peroxisome matrix, docking; biological_process GO:0016021; integral to membrane; cellular_component GO:0005515; protein binding; molecular_function}	{NA}
A00958	{CONTIG12:710288:712149:-}	{gi|597996715|ref|XP_007333580.1|; hypothetical protein [Agaricus bisporus var. burnettii JB137-S8, AGABI1DRAFT_116170]}	{NA}	{abp:AGABI1DRAFT116170; }	{NA}	{NA}	{NA}
A00959	{CONTIG12:712268:712961:-}	{NA}	{NA}	{NA}	{NA}	{NA}	{NA}
A00960	{CONTIG12:714361:716023:-}	{gi|597996719|ref|XP_007333581.1|; hypothetical protein [Agaricus bisporus var. burnettii JB137-S8, AGABI1DRAFT_116171]}	{Q92400; GUX2_AGABI Exoglucanase OS=Agaricus bisporus GN=cel2 PE=2 SV=1}	{abp:AGABI1DRAFT116171; K01225 CBH1 cellulose 1,4-beta-cellobiosidase 3.2.1.91 Metabolism; Carbohydrate metabolism; Starch and sucrose metabolism [PATH:ko00500] }	{NA}	{GO:0005576; NA GO:0030248; cellulose binding; molecular_function GO:0005975; carbohydrate metabolic process; biological_process GO:0004553; hydrolase activity, hydrolyzing O-glycosyl compounds; molecular_function}	{CAA90422.1_CBM1; {cellobiohydrolase I (Cel2);--;Agaricus bisporus D649;Q92400} Modules of approx. 40 residues found almost exclusively in fungi. The cellulose-binding function has been demonstrated in many cases, and appears to be mediated by three aromatic residues separated by about 10.4 angstrom and which form a flat surface. The only non-fungal occurence of CBM1 is in an algal non-hydrolytic…
A00961	{CONTIG12:717996:721194:-}	{gi|597996723|ref|XP_007333582.1|; hypothetical protein [Agaricus bisporus var. burnettii JB137-S8, AGABI1DRAFT_131923]}	{NA}	{abp:AGABI1DRAFT131923; }	{NA}	{NA}	{NA}
A00962	{CONTIG12:725425:726399:-}	{NA}	{NA}	{NA}	{NA}	{NA}	{NA}
A00963	{CONTIG12:727065:728896:+}	{gi|597990775|ref|XP_007332154.1|; hypothetical protein [Agaricus bisporus var. burnettii JB137-S8, AGABI1DRAFT_130574]}	{NA}	{abp:AGABI1DRAFT130574; }	{NA}	{GO:0003724; RNA helicase activity; molecular_function GO:0005524; ATP binding; molecular_function GO:0006368; transcription elongation from RNA polymerase II promoter; biological_process GO:0003723; RNA binding; molecular_function GO:0008023; transcription elongation factor complex; cellular_component GO:0016887; ATPase activity; molecular_function}	{NA}
A00964	{CONTIG12:7992:10031:+}	{gi|238575993|ref|XP_002387871.1|; hypothetical protein [Moniliophthora perniciosa FA553, MPER_13182]}	{NA}	{mpr:MPER_13182; }	{NA}	{GO:0015074; DNA integration; biological_process}	{NA}
A00965	{CONTIG12:60254:61723:+}	{NA}	{NA}	{abv:AGABI2DRAFT116109; }	{NA}	{GO:0008270; zinc ion binding; molecular_function GO:0003676; nucleic acid binding; molecular_function}	{NA}
A00966	{CONTIG12:731814:733292:+}	{gi|597990855|ref|XP_007332174.1|; hypothetical protein [Agaricus bisporus var. burnettii JB137-S8, AGABI1DRAFT_108305]}	{NA}	{abp:AGABI1DRAFT108305; }	{NA}	{GO:0005524; ATP binding; molecular_function GO:0016887; ATPase activity; molecular_function GO:0003723; RNA binding; molecular_function GO:0003724; RNA helicase activity; molecular_function}	{NA}
A00967	{CONTIG12:735114:739661:+}	{gi|170112043|ref|XP_001887224.1|; reverse transcriptase-RNase H-integrase [Laccaria bicolor S238N-H82]}	{NA}	{lbc:LACBIDRAFT_315808; }	{NA}	{GO:0003964; RNA-directed DNA polymerase activity; molecular_function GO:0003723; RNA binding; molecular_function GO:0015074; DNA integration; biological_process GO:0006278; RNA-dependent DNA replication; biological_process}	{NA}
A00968	{CONTIG12:739836:740462:+}	{NA}	{NA}	{NA}	{NA}	{GO:0004672; protein kinase activity; molecular_function GO:0006468; protein phosphorylation; biological_process GO:0005524; ATP binding; molecular_function}	{NA}
A00969	{CONTIG12:741470:743753:+}	{gi|598002485|ref|XP_007334972.1|; hypothetical protein [Agaricus bisporus var. burnettii JB137-S8, AGABI1DRAFT_65577]}	{NA}	{abv:AGABI2DRAFT194515; }	{NA}	{GO:0003824; NA GO:0008152; NA}	{NA}
A00970	{CONTIG12:747811:748623:-}	{gi|568461626|ref|XP_006462986.1|; hypothetical protein [Agaricus bisporus var. bisporus H97, AGABI2DRAFT_179551]}	{NA}	{abv:AGABI2DRAFT179551; }	{NA}	{NA}	{NA}
A00971	{CONTIG12:752776:754290:-}	{NA}	{NA}	{NA}	{NA}	{NA}	{NA}
A00972	{CONTIG12:755159:755978:-}	{gi|568464128|ref|XP_006463806.1|; hypothetical protein [Agaricus bisporus var. bisporus H97, AGABI2DRAFT_120609]}	{NA}	{abv:AGABI2DRAFT120609; }	{NA}	{GO:0006629; lipid metabolic process; biological_process GO:0016788; hydrolase activity, acting on ester bonds; molecular_function}	{NA}
A00973	{CONTIG12:756380:757528:+}	{gi|568464125|ref|XP_006463805.1|; hypothetical protein [Agaricus bisporus var. bisporus H97, AGABI2DRAFT_208727]}	{NA}	{abv:AGABI2DRAFT208727; }	{NA}	{GO:0008270; zinc ion binding; molecular_function GO:0005515; protein binding; molecular_function}	{NA}
A00974	{CONTIG12:765083:766591:-}	{gi|598003619|ref|XP_007335213.1|; hypothetical protein [Agaricus bisporus var. burnettii JB137-S8, AGABI1DRAFT_133582]}	{NA}	{NA}	{NA}	{NA}	{NA}
A00975	{CONTIG12:769586:775871:+}	{gi|238576073|ref|XP_002387903.1|; hypothetical protein [Moniliophthora perniciosa FA553, MPER_13146]}	{NA}	{mpr:MPER_13146; }	{NA}	{GO:0006508; proteolysis; biological_process GO:0004190; aspartic-type endopeptidase activity; molecular_function GO:0015074; DNA integration; biological_process}	{NA}
A00976	{CONTIG12:62053:65403:+}	{gi|691796015|emb|CDO69315.1|; hypothetical protein [Trametes cinnabarina, BN946_scf184976.g34]}	{NA}	{cne:CNF03140; }	{NA}	{GO:0003723; RNA binding; molecular_function GO:0003964; RNA-directed DNA polymerase activity; molecular_function GO:0015074; DNA integration; biological_process GO:0006278; RNA-dependent DNA replication; biological_process}	{NA}
A00977	{CONTIG12:775941:777314:-}	{NA}	{NA}	{NA}	{NA}	{NA}	{NA}
A00978	{CONTIG12:778256:780617:-}	{NA}	{NA}	{NA}	{NA}	{GO:0006355; regulation of transcription, DNA-dependent; biological_process GO:0006270; DNA-dependent DNA replication initiation; biological_process GO:0005634; nucleus; cellular_component}	{NA}
A00979	{CONTIG12:785941:787443:-}	{gi|598002829|ref|XP_007335048.1|; hypothetical protein [Agaricus bisporus var. burnettii JB137-S8, AGABI1DRAFT_48228]}	{NA}	{abp:AGABI1DRAFT130832; }	{NA}	{NA}	{NA}
A00980	{CONTIG12:796650:797299:-}	{gi|597992475|ref|XP_007332557.1|; hypothetical protein [Agaricus bisporus var. burnettii JB137-S8, AGABI1DRAFT_115586]}	{NA}	{abp:AGABI1DRAFT115586; }	{NA}	{GO:0005515; protein binding; molecular_function}	{NA}
A00981	{CONTIG12:799392:801165:+}	{gi|568464113|ref|XP_006463801.1|; hypothetical protein [Agaricus bisporus var. bisporus H97, AGABI2DRAFT_208721]}	{NA}	{abv:AGABI2DRAFT208721; }	{NA}	{GO:0055114; oxidation-reduction process; biological_process GO:0020037; heme binding; molecular_function GO:0005506; iron ion binding; molecular_function GO:0016705; oxidoreductase activity, acting on paired donors, with incorporation or reduction of molecular oxygen; molecular_function}	{NA}
A00982	{CONTIG12:802769:803397:+}	{gi|597992409|ref|XP_007332545.1|; hypothetical protein [Agaricus bisporus var. burnettii JB137-S8, AGABI1DRAFT_93854]}	{NA}	{abp:AGABI1DRAFT93854; }	{NA}	{NA}	{NA}
A00983	{CONTIG12:807255:808587:-}	{NA}	{NA}	{NA}	{NA}	{NA}	{NA}
A00984	{CONTIG12:809143:809887:+}	{NA}	{NA}	{NA}	{NA}	{NA}	{NA}
A00985	{CONTIG12:810329:813110:-}	{gi|568438842|ref|XP_006455418.1|; hypothetical protein [Agaricus bisporus var. bisporus H97, AGABI2DRAFT_121349]}	{NA}	{abv:AGABI2DRAFT121349; }	{NA}	{NA}	{NA}
A00986	{CONTIG12:814179:817403:+}	{gi|598002907|ref|XP_007335059.1|; hypothetical protein AGABI1DRAFT_48245, partial [Agaricus bisporus var. burnettii JB137-S8]}	{NA}	{abv:AGABI2DRAFT116541; }	{NA}	{GO:0000398; nuclear mRNA splicing, via spliceosome; biological_process GO:0005681; spliceosomal complex; cellular_component}	{NA}
A00987	{CONTIG12:65603:66841:-}	{NA}	{NA}	{NA}	{NA}	{NA}	{NA}
A00988	{CONTIG12:820673:822325:-}	{gi|691788899|emb|CDO75026.1|; hypothetical protein [Trametes cinnabarina, BN946_scf184640.g1]}	{NA}	{abv:AGABI2DRAFT58655; }	{NA}	{GO:0005515; protein binding; molecular_function}	{NA}
A00989	{CONTIG12:824608:826161:-}	{gi|598003169|ref|XP_007335114.1|; hypothetical protein [Agaricus bisporus var. burnettii JB137-S8, AGABI1DRAFT_133462]}	{NA}	{NA}	{NA}	{GO:0003712; transcription cofactor activity; molecular_function GO:0000124; SAGA complex; cellular_component}	{NA}
A00990	{CONTIG12:830555:831868:+}	{gi|597992459|ref|XP_007332553.1|; hypothetical protein [Agaricus bisporus var. burnettii JB137-S8, AGABI1DRAFT_78083]}	{NA}	{abp:AGABI1DRAFT78083; }	{NA}	{NA}	{NA}
A00991	{CONTIG12:832165:836238:+}	{gi|597992455|ref|XP_007332552.1|; hypothetical protein [Agaricus bisporus var. burnettii JB137-S8, AGABI1DRAFT_115583]}	{P53396; ACLY_HUMAN ATP-citrate synthase OS=Homo sapiens GN=ACLY PE=1 SV=3}	{abp:AGABI1DRAFT115583; K01648 ACLY ATP citrate (pro-S)-lyase 2.3.3.8 Metabolism; Carbohydrate metabolism; Citrate cycle (TCA cycle) [PATH:ko00020] Metabolism; Energy metabolism; Carbon fixation pathways in prokaryotes [PATH:ko00720] }	{7303012; KOG1254 ATP-citrate lyase C Energy production and conversion ;}	{GO:0003824; NA GO:0044262; cellular carbohydrate metabolic process; biological_process GO:0008152; NA GO:0046912; transferase activity, transferring acyl groups, acyl groups converted into alkyl on transfer; molecular_function GO:0048037; cofactor binding; molecular_function}	{NA}
A00992	{CONTIG12:843880:845892:-}	{gi|597991915|ref|XP_007332428.1|; hypothetical protein [Agaricus bisporus var. burnettii JB137-S8, AGABI1DRAFT_62685]}	{NA}	{abp:AGABI1DRAFT62685; }	{NA}	{GO:0055114; oxidation-reduction process; biological_process GO:0020037; heme binding; molecular_function GO:0005506; iron ion binding; molecular_function GO:0016705; oxidoreductase activity, acting on paired donors, with incorporation or reduction of molecular oxygen; molecular_function}	{NA}
A00993	{CONTIG12:847691:849730:+}	{gi|568464095|ref|XP_006463795.1|; hypothetical protein [Agaricus bisporus var. bisporus H97, AGABI2DRAFT_145015]}	{NA}	{abv:AGABI2DRAFT145015; }	{NA}	{NA}	{NA}
A00994	{CONTIG12:852160:853556:+}	{NA}	{NA}	{NA}	{NA}	{GO:0016021; integral to membrane; cellular_component}	{NA}
A00995	{CONTIG12:855500:856627:+}	{NA}	{NA}	{NA}	{NA}	{NA}	{NA}
A00996	{CONTIG12:861676:862074:-}	{gi|599122222|ref|XP_007388279.1|; hypothetical protein PUNSTDRAFT_17540, partial [Punctularia strigosozonata HHB-11173 SS5]}	{NA}	{NA}	{NA}	{NA}	{NA}
A00997	{CONTIG12:873397:877044:+}	{NA}	{NA}	{NA}	{NA}	{GO:0015074; DNA integration; biological_process}	{NA}
A00998	{CONTIG12:69536:71533:-}	{gi|170093898|ref|XP_001878170.1|; reverse transcriptase-RNase H-integrase [Laccaria bicolor S238N-H82]}	{NA}	{lbc:LACBIDRAFT_315808; }	{NA}	{GO:0004190; aspartic-type endopeptidase activity; molecular_function GO:0006508; proteolysis; biological_process GO:0003723; RNA binding; molecular_function GO:0003964; RNA-directed DNA polymerase activity; molecular_function GO:0006278; RNA-dependent DNA replication; biological_process}	{NA}
A00999	{CONTIG12:877125:878906:+}	{gi|691788899|emb|CDO75026.1|; hypothetical protein [Trametes cinnabarina, BN946_scf184640.g1]}	{NA}	{abv:AGABI2DRAFT58655; }	{NA}	{GO:0043565; sequence-specific DNA binding; molecular_function GO:0003700; sequence-specific DNA binding transcription factor activity; molecular_function GO:0006355; regulation of transcription, DNA-dependent; biological_process}	{NA}
A01000	{CONTIG12:878946:879518:+}	{gi|598002987|ref|XP_007335075.1|; hypothetical protein AGABI1DRAFT_48264, partial [Agaricus bisporus var. burnettii JB137-S8]}	{NA}	{NA}	{NA}	{NA}	{NA}
A01001	{CONTIG12:880030:880935:-}	{NA}	{NA}	{NA}	{NA}	{NA}	{NA}
A01002	{CONTIG12:884598:885902:-}	{gi|599411139|ref|XP_007403009.1|; hypothetical protein PHACADRAFT_58702, partial [Phanerochaete carnosa HHB-10118-sp]}	{NA}	{mpr:MPER_13185; }	{NA}	{GO:0006278; RNA-dependent DNA replication; biological_process GO:0003964; RNA-directed DNA polymerase activity; molecular_function GO:0003723; RNA binding; molecular_function}	{NA}
A01003	{CONTIG12:886911:887722:-}	{gi|598006983|ref|XP_007336083.1|; hypothetical protein AGABI1DRAFT_135166, partial [Agaricus bisporus var. burnettii JB137-S8]}	{NA}	{abp:AGABI1DRAFT128223; }	{NA}	{NA}	{NA}
A01004	{CONTIG12:891931:892902:+}	{gi|568464003|ref|XP_006463765.1|; hypothetical protein [Agaricus bisporus var. bisporus H97, AGABI2DRAFT_120573]}	{NA}	{abv:AGABI2DRAFT120573; }	{NA}	{NA}	{NA}
A01005	{CONTIG12:893268:894756:+}	{gi|568464080|ref|XP_006463790.1|; hypothetical protein [Agaricus bisporus var. bisporus H97, AGABI2DRAFT_180013]}	{Q5PXQ6; CHQB_NOCSI Hydroxyquinol 1,2-dioxygenase OS=Nocardioides simplex GN=chqB PE=1 SV=1}	{abv:AGABI2DRAFT180013; }	{NA}	{GO:0006725; cellular aromatic compound metabolic process; biological_process GO:0003824; NA GO:0005506; iron ion binding; molecular_function GO:0009712; catechol metabolic process; biological_process GO:0055114; oxidation-reduction process; biological_process GO:0008199; ferric iron binding; molecular_function GO:0018576; catechol 1,2-dioxygenase activity; molecular_function}	{NA}
A01006	{CONTIG12:896195:896845:+}	{gi|568464086|ref|XP_006463792.1|; hypothetical protein [Agaricus bisporus var. bisporus H97, AGABI2DRAFT_138080]}	{P18253; CYPH_SCHPO Peptidyl-prolyl cis-trans isomerase OS=Schizosaccharomyces pombe (strain 972 / ATCC 24843) GN=ppi1 PE=3 SV=1}	{abv:AGABI2DRAFT138080; }	{SPBC28F2.03; KOG0865 Cyclophilin type peptidyl-prolyl cis-trans isomerase O Posttranslational modification, protein turnover, chaperones ;}	{GO:0006457; protein folding; biological_process GO:0003755; peptidyl-prolyl cis-trans isomerase activity; molecular_function}	{NA}
A01007	{CONTIG12:901520:902495:-}	{NA}	{NA}	{NA}	{NA}	{NA}	{NA}
A01008	{CONTIG12:905041:905797:-}	{gi|597992401|ref|XP_007332543.1|; hypothetical protein [Agaricus bisporus var. burnettii JB137-S8, AGABI1DRAFT_130950]}	{NA}	{abp:AGABI1DRAFT130950; }	{NA}	{GO:0016020; membrane; cellular_component}	{NA}
A01009	{CONTIG12:72296:72559:-}	{NA}	{NA}	{NA}	{NA}	{NA}	{NA}
A01010	{CONTIG12:907706:911360:+}	{gi|302678283|ref|XP_003028824.1|; hypothetical protein [Schizophyllum commune H4-8, SCHCODRAFT_258323]}	{NA}	{scm:SCHCODRAFT_258323; }	{NA}	{GO:0003676; nucleic acid binding; molecular_function}	{NA}
A01011	{CONTIG12:911730:913808:+}	{gi|568464068|ref|XP_006463786.1|; hypothetical protein [Agaricus bisporus var. bisporus H97, AGABI2DRAFT_194491]}	{NA}	{abv:AGABI2DRAFT194491; }	{NA}	{GO:0016884; carbon-nitrogen ligase activity, with glutamine as amido-N-donor; molecular_function}	{NA}
A01012	{CONTIG12:915501:916473:+}	{NA}	{NA}	{NA}	{NA}	{NA}	{NA}
A01013	{CONTIG12:919882:921664:-}	{gi|597992391|ref|XP_007332541.1|; hypothetical protein [Agaricus bisporus var. burnettii JB137-S8, AGABI1DRAFT_78057]}	{P87172; GPI3_SCHPO Phosphatidylinositol N-acetylglucosaminyltransferase gpi3 subunit OS=Schizosaccharomyces pombe (strain 972 / ATCC 24843) GN=gpi3 PE=3 SV=1}	{abp:AGABI1DRAFT78057; K03857 PIGA, GPI3 phosphatidylinositol glycan, class A 2.4.1.198 Metabolism; Glycan biosynthesis and metabolism; Glycosylphosphatidylinositol(GPI)-anchor biosynthesis [PATH:ko00563] }	{SPBC3D6.07; KOG1111 N-acetylglucosaminyltransferase complex, subunit PIG-A/SPT14, required for phosphatidylinositol biosynthesis/Sulfolipid synthase MOI Cell wall/membrane/envelope biogenesis ; Posttranslational modification, protein turnover, chaperones ; Lipid transport and metabolism ;}	{GO:0006506; GPI anchor biosynthetic process; biological_process GO:0009058; biosynthetic process; biological_process}	{NA}
A01014	{CONTIG12:922523:924840:-}	{gi|597976421|ref|XP_007328660.1|; hypothetical protein [Agaricus bisporus var. burnettii JB137-S8, AGABI1DRAFT_105978]}	{Q3L245; PDH1_LEUMG Pyranose dehydrogenase 1 OS=Leucoagaricus meleagris GN=pdh1 PE=1 SV=1}	{abp:AGABI1DRAFT105978; }	{NA}	{GO:0006813; potassium ion transport; biological_process GO:0016491; oxidoreductase activity; molecular_function GO:0016117; carotenoid biosynthetic process; biological_process GO:0055114; oxidation-reduction process; biological_process GO:0016614; oxidoreductase activity, acting on CH-OH group of donors; molecular_function GO:0050660; flavin adenine dinucleotide binding; molecular_function GO:00…	{AAW82996.1_AA3; {pyranose dehydrogenase (Pdh1;PDH;AmPDH);1.1.99.29;;Leucoagaricus meleagris;Q3L245} cellobiose dehydrogenase (EC 1.1.99.18); glucose 1-oxidase (EC 1.1.3.4); aryl alcohol oxidase (EC 1.1.3.7); alcohol oxidase (EC 1.1.3.13); pyranose oxidase (EC 1.1.3.10) AA3 enzymes belong to the glucose-methanol-choline (GMC) oxidoreductases family. AA3 enzymes are flavoproteins containing a flav…
A01015	{CONTIG12:925518:926242:-}	{gi|597992095|ref|XP_007332472.1|; hypothetical protein AGABI1DRAFT_115530, partial [Agaricus bisporus var. burnettii JB137-S8]}	{NA}	{abp:AGABI1DRAFT115530; }	{NA}	{NA}	{NA}
A01016	{CONTIG12:929996:930977:-}	{gi|568452096|ref|XP_006459822.1|; hypothetical protein [Agaricus bisporus var. bisporus H97, AGABI2DRAFT_219209]}	{NA}	{abv:AGABI2DRAFT219209; K15565 CTK3 CTD kinase subunit gamma -- }	{NA}	{NA}	{NA}
A01017	{CONTIG12:931430:931890:-}	{gi|568463913|ref|XP_006463735.1|; hypothetical protein [Agaricus bisporus var. bisporus H97, AGABI2DRAFT_138063]}	{O13300; HYP3_AGABI Hydrophobin-3 OS=Agaricus bisporus GN=abh3 PE=3 SV=1}	{abv:AGABI2DRAFT138063; }	{NA}	{GO:0005199; structural constituent of cell wall; molecular_function GO:0009277; fungal-type cell wall; cellular_component}	{NA}
A01018	{CONTIG12:935596:937764:+}	{gi|597989213|ref|XP_007331781.1|; hypothetical protein [Agaricus bisporus var. burnettii JB137-S8, AGABI1DRAFT_130203]}	{NA}	{abp:AGABI1DRAFT130203; }	{NA}	{GO:0003723; RNA binding; molecular_function GO:0043531; ADP binding; molecular_function GO:0003724; RNA helicase activity; molecular_function}	{NA}
A01019	{CONTIG12:942388:944043:+}	{gi|597989213|ref|XP_007331781.1|; hypothetical protein [Agaricus bisporus var. burnettii JB137-S8, AGABI1DRAFT_130203]}	{NA}	{abp:AGABI1DRAFT130203; }	{NA}	{NA}	{NA}
A01020	{CONTIG12:72901:73479:+}	{NA}	{NA}	{NA}	{NA}	{NA}	{NA}
A01021	{CONTIG12:945848:948029:+}	{gi|597989213|ref|XP_007331781.1|; hypothetical protein [Agaricus bisporus var. burnettii JB137-S8, AGABI1DRAFT_130203]}	{NA}	{abp:AGABI1DRAFT130203; }	{NA}	{GO:0005622; intracellular; cellular_component GO:0043531; ADP binding; molecular_function GO:0005525; GTP binding; molecular_function GO:0007264; small GTPase mediated signal transduction; biological_process}	{NA}
A01022	{CONTIG12:948680:950531:-}	{gi|597967051|ref|XP_007326387.1|; hypothetical protein [Agaricus bisporus var. burnettii JB137-S8, AGABI1DRAFT_104370]}	{NA}	{abp:AGABI1DRAFT104370; }	{NA}	{NA}	{NA}
A01023	{CONTIG12:953317:953692:+}	{gi|170102935|ref|XP_001882683.1|; predicted protein [Laccaria bicolor S238N-H82]}	{NA}	{lbc:LACBIDRAFT_294608; }	{NA}	{NA}	{NA}
A01024	{CONTIG12:956225:956694:+}	{gi|568463913|ref|XP_006463735.1|; hypothetical protein [Agaricus bisporus var. bisporus H97, AGABI2DRAFT_138063]}	{O13300; HYP3_AGABI Hydrophobin-3 OS=Agaricus bisporus GN=abh3 PE=3 SV=1}	{abv:AGABI2DRAFT138063; }	{NA}	{GO:0009277; fungal-type cell wall; cellular_component GO:0005199; structural constituent of cell wall; molecular_function}	{NA}
A01025	{CONTIG12:957724:960752:-}	{gi|597989213|ref|XP_007331781.1|; hypothetical protein [Agaricus bisporus var. burnettii JB137-S8, AGABI1DRAFT_130203]}	{NA}	{abp:AGABI1DRAFT130203; }	{NA}	{GO:0003723; RNA binding; molecular_function GO:0043531; ADP binding; molecular_function GO:0003724; RNA helicase activity; molecular_function}	{NA}
A01026	{CONTIG12:961556:963853:-}	{gi|597989213|ref|XP_007331781.1|; hypothetical protein [Agaricus bisporus var. burnettii JB137-S8, AGABI1DRAFT_130203]}	{NA}	{abp:AGABI1DRAFT130203; }	{NA}	{GO:0043531; ADP binding; molecular_function}	{NA}
A01027	{CONTIG12:966292:968560:-}	{gi|568465048|ref|XP_006464109.1|; hypothetical protein [Agaricus bisporus var. bisporus H97, AGABI2DRAFT_180194]}	{NA}	{abv:AGABI2DRAFT180194; }	{NA}	{GO:0043531; ADP binding; molecular_function}	{NA}
A01028	{CONTIG12:971038:972978:-}	{gi|597989213|ref|XP_007331781.1|; hypothetical protein [Agaricus bisporus var. burnettii JB137-S8, AGABI1DRAFT_130203]}	{NA}	{abp:AGABI1DRAFT130203; }	{NA}	{GO:0005525; GTP binding; molecular_function GO:0043531; ADP binding; molecular_function GO:0005622; intracellular; cellular_component GO:0007264; small GTPase mediated signal transduction; biological_process}	{NA}
A01029	{CONTIG12:974780:976393:-}	{gi|597989213|ref|XP_007331781.1|; hypothetical protein [Agaricus bisporus var. burnettii JB137-S8, AGABI1DRAFT_130203]}	{NA}	{abp:AGABI1DRAFT130203; }	{NA}	{GO:0043531; ADP binding; molecular_function}	{NA}
A01030	{CONTIG12:978911:979300:-}	{NA}	{NA}	{NA}	{NA}	{NA}	{NA}
A01031	{CONTIG12:74242:76239:+}	{gi|170093898|ref|XP_001878170.1|; reverse transcriptase-RNase H-integrase [Laccaria bicolor S238N-H82]}	{NA}	{lbc:LACBIDRAFT_315808; }	{NA}	{GO:0006278; RNA-dependent DNA replication; biological_process GO:0003964; RNA-directed DNA polymerase activity; molecular_function GO:0003723; RNA binding; molecular_function GO:0006508; proteolysis; biological_process GO:0004190; aspartic-type endopeptidase activity; molecular_function}	{NA}
A01032	{CONTIG12:979664:982712:-}	{gi|597989213|ref|XP_007331781.1|; hypothetical protein [Agaricus bisporus var. burnettii JB137-S8, AGABI1DRAFT_130203]}	{NA}	{abp:AGABI1DRAFT130203; }	{NA}	{GO:0043531; ADP binding; molecular_function}	{NA}
A01033	{CONTIG12:984762:985204:+}	{gi|597994115|ref|XP_007332949.1|; hypothetical protein [Agaricus bisporus var. burnettii JB137-S8, AGABI1DRAFT_87237]}	{O13300; HYP3_AGABI Hydrophobin-3 OS=Agaricus bisporus GN=abh3 PE=3 SV=1}	{abp:AGABI1DRAFT87237; }	{NA}	{GO:0009277; fungal-type cell wall; cellular_component GO:0005199; structural constituent of cell wall; molecular_function}	{NA}
A01034	{CONTIG12:987357:989546:+}	{gi|597991911|ref|XP_007332427.1|; hypothetical protein [Agaricus bisporus var. burnettii JB137-S8, AGABI1DRAFT_62660]}	{NA}	{abp:AGABI1DRAFT62660; }	{NA}	{GO:0016884; carbon-nitrogen ligase activity, with glutamine as amido-N-donor; molecular_function}	{NA}
A01035	{CONTIG12:990570:993235:-}	{gi|568464026|ref|XP_006463772.1|; hypothetical protein [Agaricus bisporus var. bisporus H97, AGABI2DRAFT_208685]}	{NA}	{abv:AGABI2DRAFT208685; }	{NA}	{NA}	{NA}
A01036	{CONTIG12:1003777:1004268:-}	{gi|568464017|ref|XP_006463769.1|; hypothetical protein [Agaricus bisporus]}	{P0CR85; T2AG_CRYNB Transcription initiation factor IIA subunit 2 OS=Cryptococcus neoformans var. neoformans serotype D (strain B-3501A) GN=TOA2 PE=3 SV=1}	{abp:AGABI1DRAFT115570; K03123 TFIIA2, GTF2A2, TOA2 transcription initiation factor TFIIA small subunit -- Genetic Information Processing; Transcription; Basal transcription factors [PATH:ko03022] Human Diseases; Cancers; Viral carcinogenesis [PATH:ko05203] }	{At4g24440; KOG3463 Transcription initiation factor IIA, gamma subunit K Transcription ;}	{GO:0006367; transcription initiation from RNA polymerase II promoter; biological_process GO:0005672; transcription factor TFIIA complex; cellular_component}	{NA}
A01037	{CONTIG12:1007036:1008026:-}	{gi|568464003|ref|XP_006463765.1|; hypothetical protein [Agaricus bisporus var. bisporus H97, AGABI2DRAFT_120573]}	{NA}	{abv:AGABI2DRAFT120573; }	{NA}	{NA}	{NA}
A01038	{CONTIG12:1009880:1010322:-}	{gi|597994115|ref|XP_007332949.1|; hypothetical protein [Agaricus bisporus var. burnettii JB137-S8, AGABI1DRAFT_87237]}	{P16933; SC3_SCHCO Fruiting body protein SC3 OS=Schizophyllum commune GN=SC3 PE=1 SV=2}	{abp:AGABI1DRAFT87237; }	{NA}	{GO:0009277; fungal-type cell wall; cellular_component GO:0005199; structural constituent of cell wall; molecular_function}	{NA}
A01039	{CONTIG12:1013611:1015767:+}	{gi|568463997|ref|XP_006463763.1|; hypothetical protein [Agaricus bisporus var. bisporus H97, AGABI2DRAFT_208677]}	{NA}	{abv:AGABI2DRAFT208677; }	{NA}	{GO:0016884; carbon-nitrogen ligase activity, with glutamine as amido-N-donor; molecular_function}	{NA}
A01040	{CONTIG12:1016945:1019111:+}	{gi|568463997|ref|XP_006463763.1|; hypothetical protein [Agaricus bisporus var. bisporus H97, AGABI2DRAFT_208677]}	{NA}	{abv:AGABI2DRAFT208677; }	{NA}	{GO:0016884; carbon-nitrogen ligase activity, with glutamine as amido-N-donor; molecular_function}	{NA}
A01041	{CONTIG12:1021147:1023359:+}	{gi|597989213|ref|XP_007331781.1|; hypothetical protein [Agaricus bisporus var. burnettii JB137-S8, AGABI1DRAFT_130203]}	{NA}	{abp:AGABI1DRAFT130203; }	{NA}	{GO:0043531; ADP binding; molecular_function}	{NA}
A01042	{CONTIG12:81826:85012:-}	{gi|568451851|ref|XP_006459740.1|; hypothetical protein [Agaricus bisporus var. bisporus H97, AGABI2DRAFT_116691]}	{NA}	{abv:AGABI2DRAFT116691; }	{NA}	{GO:0005515; protein binding; molecular_function}	{NA}
A01043	{CONTIG12:1026012:1026507:-}	{gi|568450955|ref|XP_006459442.1|; hypothetical protein [Agaricus bisporus var. bisporus H97, AGABI2DRAFT_116414]}	{NA}	{abv:AGABI2DRAFT116414; }	{NA}	{NA}	{NA}
A01044	{CONTIG12:1031606:1032056:+}	{gi|630202103|ref|XP_007852131.1|; hydrophobin 2 [Moniliophthora roreri MCA 2997]}	{P16933; SC3_SCHCO Fruiting body protein SC3 OS=Schizophyllum commune GN=SC3 PE=1 SV=2}	{mrr:Moror_3153; }	{NA}	{GO:0005199; structural constituent of cell wall; molecular_function GO:0009277; fungal-type cell wall; cellular_component}	{NA}
A01045	{CONTIG12:1034363:1037240:+}	{NA}	{NA}	{NA}	{NA}	{GO:0003964; RNA-directed DNA polymerase activity; molecular_function GO:0003723; RNA binding; molecular_function GO:0006278; RNA-dependent DNA replication; biological_process GO:0003677; DNA binding; molecular_function}	{NA}
A01046	{CONTIG12:1037514:1038735:-}	{gi|568464744|ref|XP_006464008.1|; hypothetical protein [Agaricus bisporus var. bisporus H97, AGABI2DRAFT_120814]}	{NA}	{abv:AGABI2DRAFT120814; }	{NA}	{NA}	{NA}
A01047	{CONTIG12:1041506:1043591:+}	{gi|597992113|ref|XP_007332476.1|; hypothetical protein [Agaricus bisporus var. burnettii JB137-S8, AGABI1DRAFT_130878]}	{NA}	{abp:AGABI1DRAFT130878; }	{NA}	{NA}	{NA}
A01048	{CONTIG12:1046090:1048713:-}	{gi|568463599|ref|XP_006463631.1|; hypothetical protein [Agaricus bisporus var. bisporus H97, AGABI2DRAFT_187168]}	{Q10313; TRNL_SCHPO tRNA ligase 1 OS=Schizosaccharomyces pombe (strain 972 / ATCC 24843) GN=trl1 PE=3 SV=2}	{abv:AGABI2DRAFT187168; K14679 TRL1 tRNA ligase 6.5.1.3 }	{NA}	{GO:0006388; tRNA splicing, via endonucleolytic cleavage and ligation; biological_process GO:0005524; ATP binding; molecular_function GO:0003972; RNA ligase (ATP) activity; molecular_function}	{NA}
A01049	{CONTIG12:1050789:1051815:-}	{gi|597992333|ref|XP_007332527.1|; hypothetical protein [Agaricus bisporus var. burnettii JB137-S8, AGABI1DRAFT_115569]}	{NA}	{abp:AGABI1DRAFT115569; }	{NA}	{NA}	{NA}
A01050	{CONTIG12:1053322:1054732:-}	{gi|597991907|ref|XP_007332426.1|; hypothetical protein [Agaricus bisporus var. burnettii JB137-S8, AGABI1DRAFT_62649]}	{Q8LAZ7; CSN5A_ARATH COP9 signalosome complex subunit 5a OS=Arabidopsis thaliana GN=CSN5A PE=1 SV=2}	{abp:AGABI1DRAFT62649; K09613 COPS5, CSN5 COP9 signalosome complex subunit 5 3.4.-.- }	{At1g22920; KOG1554 COP9 signalosome, subunit CSN5 OT Posttranslational modification, protein turnover, chaperones ; Signal transduction mechanisms ;}	{GO:0005102; receptor binding; molecular_function GO:0030168; platelet activation; biological_process GO:0030674; protein binding, bridging; molecular_function GO:0005515; protein binding; molecular_function GO:0051258; protein polymerization; biological_process GO:0007165; signal transduction; biological_process GO:0005577; fibrinogen complex; cellular_component}	{NA}
A01051	{CONTIG12:1055209:1055930:+}	{gi|568464762|ref|XP_006464014.1|; hypothetical protein [Agaricus bisporus]}	{P0CX23; RL20A_YEAST 60S ribosomal protein L20-A OS=Saccharomyces cerevisiae (strain ATCC 204508 / S288c) GN=RPL20A PE=1 SV=1}	{abp:AGABI1DRAFT86957; K02882 RP-L18Ae, RPL18A large subunit ribosomal protein L18Ae -- Genetic Information Processing; Translation; Ribosome [PATH:ko03010] }	{YMR242c; KOG0829 60S ribosomal protein L18A J Translation, ribosomal structure and biogenesis ;}	{GO:0003735; structural constituent of ribosome; molecular_function GO:0006412; translation; biological_process GO:0005840; ribosome; cellular_component}	{NA}
A01052	{CONTIG12:1059300:1061137:-}	{gi|568464768|ref|XP_006464016.1|; hypothetical protein [Agaricus bisporus var. bisporus H97, AGABI2DRAFT_209029]}	{NA}	{abv:AGABI2DRAFT209029; }	{NA}	{NA}	{NA}
A01053	{CONTIG12:85184:85829:+}	{gi|630186480|ref|XP_007847092.1|; hypothetical protein [Moniliophthora roreri MCA 2997, Moror_1569]}	{NA}	{mrr:Moror_1569; }	{NA}	{NA}	{NA}
A01054	{CONTIG12:1068906:1070705:-}	{gi|568464768|ref|XP_006464016.1|; hypothetical protein [Agaricus bisporus var. bisporus H97, AGABI2DRAFT_209029]}	{NA}	{abv:AGABI2DRAFT209029; }	{NA}	{NA}	{NA}
A01055	{CONTIG12:1072302:1073503:-}	{gi|597992317|ref|XP_007332523.1|; hypothetical protein [Agaricus bisporus var. burnettii JB137-S8, AGABI1DRAFT_122398]}	{NA}	{abp:AGABI1DRAFT122398; }	{NA}	{NA}	{NA}
A01056	{CONTIG12:1075581:1077956:+}	{gi|568464771|ref|XP_006464017.1|; hypothetical protein [Agaricus bisporus var. bisporus H97, AGABI2DRAFT_120820]}	{NA}	{abv:AGABI2DRAFT120820; K11426 SMYD SET and MYND domain-containing protein -- }	{NA}	{GO:0005515; protein binding; molecular_function}	{NA}
A01057	{CONTIG12:1078970:1079920:+}	{gi|568464774|ref|XP_006464018.1|; hypothetical protein [Agaricus bisporus var. bisporus H97, AGABI2DRAFT_226035]}	{NA}	{abv:AGABI2DRAFT226035; }	{NA}	{GO:0005634; nucleus; cellular_component}	{NA}
A01058	{CONTIG12:1082393:1084395:-}	{gi|568464780|ref|XP_006464020.1|; hypothetical protein AGABI2DRAFT_74658, partial [Agaricus bisporus var. bisporus H97]}	{NA}	{abv:AGABI2DRAFT74658; }	{NA}	{GO:0016021; integral to membrane; cellular_component GO:0055085; transmembrane transport; biological_process}	{NA}
A01059	{CONTIG12:1087339:1089291:-}	{gi|568464780|ref|XP_006464020.1|; hypothetical protein AGABI2DRAFT_74658, partial [Agaricus bisporus var. bisporus H97]}	{NA}	{abv:AGABI2DRAFT74658; }	{NA}	{GO:0016021; integral to membrane; cellular_component GO:0006310; DNA recombination; biological_process GO:0009378; four-way junction helicase activity; molecular_function GO:0003677; DNA binding; molecular_function GO:0055085; transmembrane transport; biological_process GO:0006281; DNA repair; biological_process}	{NA}
A01060	{CONTIG12:1091446:1092667:+}	{gi|568464783|ref|XP_006464021.1|; hypothetical protein [Agaricus bisporus var. bisporus H97, AGABI2DRAFT_226039]}	{NA}	{abv:AGABI2DRAFT226039; }	{NA}	{NA}	{NA}
A01061	{CONTIG12:1093311:1095862:-}	{gi|568464786|ref|XP_006464022.1|; hypothetical protein [Agaricus bisporus var. bisporus H97, AGABI2DRAFT_145174]}	{NA}	{abv:AGABI2DRAFT145174; }	{NA}	{GO:0003723; RNA binding; molecular_function GO:0003724; RNA helicase activity; molecular_function}	{NA}
A01062	{CONTIG12:1096410:1098026:-}	{gi|568464792|ref|XP_006464024.1|; hypothetical protein [Agaricus bisporus var. bisporus H97, AGABI2DRAFT_120826]}	{NA}	{abv:AGABI2DRAFT120826; }	{NA}	{GO:0005515; protein binding; molecular_function}	{NA}
A01063	{CONTIG12:1104478:1105880:+}	{gi|568464795|ref|XP_006464025.1|; hypothetical protein [Agaricus bisporus var. bisporus H97, AGABI2DRAFT_194630]}	{NA}	{abv:AGABI2DRAFT194630; K01785 galM, GALM aldose 1-epimerase 5.1.3.3 Metabolism; Carbohydrate metabolism; Glycolysis / Gluconeogenesis [PATH:ko00010] Metabolism; Carbohydrate metabolism; Galactose metabolism [PATH:ko00052] }	{NA}	{GO:0005975; carbohydrate metabolic process; biological_process GO:0016853; isomerase activity; molecular_function}	{NA}
A01064	{CONTIG12:88822:89648:+}	{gi|597996835|ref|XP_007333610.1|; hypothetical protein [Agaricus bisporus var. burnettii JB137-S8, AGABI1DRAFT_116180]}	{NA}	{abp:AGABI1DRAFT116180; }	{NA}	{NA}	{NA}
A01065	{CONTIG12:1106714:1110784:-}	{gi|597992259|ref|XP_007332510.1|; hypothetical protein [Agaricus bisporus var. burnettii JB137-S8, AGABI1DRAFT_122388]}	{O60078; TYR1_SCHPO Probable prephenate dehydrogenase [NADP(+)] OS=Schizosaccharomyces pombe (strain 972 / ATCC 24843) GN=tyr1 PE=2 SV=1}	{abp:AGABI1DRAFT122388; K00211 TYR1 prephenate dehydrogenase (NADP+) 1.3.1.13 Metabolism; Amino acid metabolism; Phenylalanine, tyrosine and tryptophan biosynthesis [PATH:ko00400] }	{SPCC1494.04c; KOG2380 Prephenate dehydrogenase (NADP+) E Amino acid transport and metabolism ;}	{GO:0006098; pentose-phosphate shunt; biological_process GO:0004616; phosphogluconate dehydrogenase (decarboxylating) activity; molecular_function GO:0055114; oxidation-reduction process; biological_process GO:0048037; cofactor binding; molecular_function GO:0003857; 3-hydroxyacyl-CoA dehydrogenase activity; molecular_function GO:0030170; pyridoxal phosphate binding; molecular_function GO:0008977…	{NA}
A01066	{CONTIG12:1110946:1112118:+}	{gi|597992255|ref|XP_007332509.1|; hypothetical protein [Agaricus bisporus var. burnettii JB137-S8, AGABI1DRAFT_115556]}	{Q4P7G1; EIF3G_USTMA Eukaryotic translation initiation factor 3 subunit G OS=Ustilago maydis (strain 521 / FGSC 9021) GN=TIF35 PE=3 SV=1}	{abp:AGABI1DRAFT115556; K03248 EIF3G translation initiation factor 3 subunit G -- Genetic Information Processing; Translation; RNA transport [PATH:ko03013] }	{SPBC18H10.03; KOG0122 Translation initiation factor 3, subunit g (eIF-3g) J Translation, ribosomal structure and biogenesis ;}	{GO:0003676; nucleic acid binding; molecular_function}	{NA}
A01067	{CONTIG12:1115204:1116356:-}	{gi|568464813|ref|XP_006464031.1|; hypothetical protein [Agaricus bisporus var. bisporus H97, AGABI2DRAFT_194635]}	{NA}	{abv:AGABI2DRAFT194635; }	{NA}	{NA}	{NA}
A01068	{CONTIG12:1116798:1118439:-}	{gi|302693262|ref|XP_003036310.1|; hypothetical protein [Schizophyllum commune H4-8, SCHCODRAFT_52066]}	{B9WYE6; VRDA_ASPPA Versiconal hemiacetal acetate reductase OS=Aspergillus parasiticus GN=vrdA PE=1 SV=1}	{scm:SCHCODRAFT_52066; }	{SPAC977.14c; KOG1575 Voltage-gated shaker-like K+ channel, subunit beta/KCNAB C Energy production and conversion ;}	{NA}	{NA}
A01069	{CONTIG12:1123642:1124855:-}	{gi|568464819|ref|XP_006464033.1|; hypothetical protein [Agaricus bisporus var. bisporus H97, AGABI2DRAFT_194636]}	{NA}	{abv:AGABI2DRAFT194636; }	{NA}	{GO:0003824; NA GO:0044237; cellular metabolic process; biological_process GO:0016491; oxidoreductase activity; molecular_function GO:0008152; NA GO:0050662; coenzyme binding; molecular_function}	{NA}
A01070	{CONTIG12:1126399:1127412:-}	{gi|403420076|emb|CCM06776.1|; predicted protein [Fibroporia radiculosa]}	{NA}	{mrr:Moror_13720; }	{NA}	{GO:0055114; oxidation-reduction process; biological_process GO:0004488; methylenetetrahydrofolate dehydrogenase (NADP+) activity; molecular_function GO:0003824; NA GO:0009396; folic acid-containing compound biosynthetic process; biological_process GO:0016491; oxidoreductase activity; molecular_function GO:0008152; NA}	{NA}
A01071	{CONTIG12:1128047:1128869:-}	{gi|597992237|ref|XP_007332505.1|; hypothetical protein [Agaricus bisporus var. burnettii JB137-S8, AGABI1DRAFT_115553]}	{Q12335; PST2_YEAST Protoplast secreted protein 2 OS=Saccharomyces cerevisiae (strain ATCC 204508 / S288c) GN=PST2 PE=1 SV=1}	{abp:AGABI1DRAFT115553; K03809 wrbA NAD(P)H dehydrogenase (quinone) 1.6.5.2 Metabolism; Metabolism of cofactors and vitamins; Ubiquinone and other terpenoid-quinone biosynthesis [PATH:ko00130] }	{YDR032c; KOG3135 1,4-benzoquinone reductase-like; Trp repressor binding protein-like/protoplast-secreted protein R General function prediction only ;}	{GO:0016491; oxidoreductase activity; molecular_function GO:0010181; FMN binding; molecular_function}	{AAD21025.1_AA6; {1,4-benzoquinone reductase (QR);1.6.5.6;;Phanerochaete chrysosporium OGC101;--} 1,4-benzoquinone reductase (EC. 1.6.5.6) All experimentally characterized proteins in this family are 1,4-benzoquinone reductases. These are intracellular enzymes involved in the biodegradation of aromatic compounds and in the protection of fungal cells from reactive quinone compounds.}
A01072	{CONTIG12:1134180:1136030:+}	{gi|597992233|ref|XP_007332504.1|; hypothetical protein [Agaricus bisporus var. burnettii JB137-S8, AGABI1DRAFT_115552]}	{Q48436; BUDC_KLEPN Diacetyl reductase [(S)-acetoin forming] OS=Klebsiella pneumoniae GN=budC PE=1 SV=2}	{abp:AGABI1DRAFT115552; }	{NA}	{GO:0016491; oxidoreductase activity; molecular_function GO:0050662; coenzyme binding; molecular_function GO:0008152; NA GO:0044237; cellular metabolic process; biological_process GO:0003824; NA GO:0003854; 3-beta-hydroxy-delta5-steroid dehydrogenase activity; molecular_function GO:0006694; steroid biosynthetic process; biological_process GO:0016616; oxidoreductase activity, acting on the CH-OH g…	{NA}
A01073	{CONTIG12:1136705:1139219:-}	{gi|568464840|ref|XP_006464040.1|; hypothetical protein [Agaricus bisporus var. bisporus H97, AGABI2DRAFT_145185]}	{NA}	{abv:AGABI2DRAFT145185; }	{NA}	{GO:0006355; regulation of transcription, DNA-dependent; biological_process GO:0005634; nucleus; cellular_component}	{NA}
A01074	{CONTIG12:1139620:1142088:+}	{gi|648152699|gb|KDR66544.1|; hypothetical protein [Galerina marginata CBS 339.88, GALMADRAFT_259056]}	{NA}	{cci:CC1G_06525; }	{NA}	{GO:0020037; heme binding; molecular_function GO:0055114; oxidation-reduction process; biological_process GO:0005506; iron ion binding; molecular_function GO:0016705; oxidoreductase activity, acting on paired donors, with incorporation or reduction of molecular oxygen; molecular_function}	{NA}
A01075	{CONTIG12:10157:11491:-}	{gi|597975615|ref|XP_007328461.1|; hypothetical protein [Agaricus bisporus var. burnettii JB137-S8, AGABI1DRAFT_90753]}	{NA}	{abp:AGABI1DRAFT90753; }	{NA}	{NA}	{NA}
A01076	{CONTIG12:90566:91842:+}	{gi|568451820|ref|XP_006459730.1|; hypothetical protein [Agaricus bisporus var. bisporus H97, AGABI2DRAFT_116679]}	{NA}	{abv:AGABI2DRAFT116679; }	{NA}	{NA}	{NA}
A01077	{CONTIG12:1143190:1145048:+}	{gi|568464801|ref|XP_006464027.1|; hypothetical protein [Agaricus bisporus var. bisporus H97, AGABI2DRAFT_194632]}	{NA}	{abv:AGABI2DRAFT194632; }	{NA}	{GO:0030170; pyridoxal phosphate binding; molecular_function}	{NA}
A01078	{CONTIG12:1146036:1146880:+}	{gi|648159587|gb|KDR73315.1|; hypothetical protein [Galerina marginata CBS 339.88, GALMADRAFT_228402]}	{P21367; YCAC_ECOLI Uncharacterized protein YcaC OS=Escherichia coli (strain K12) GN=ycaC PE=1 SV=1}	{pno:SNOG_01067; }	{NA}	{GO:0003824; NA GO:0008152; NA}	{NA}
A01079	{CONTIG12:1148688:1150712:+}	{gi|568464843|ref|XP_006464041.1|; hypothetical protein [Agaricus bisporus var. bisporus H97, AGABI2DRAFT_226079]}	{NA}	{abv:AGABI2DRAFT226079; }	{NA}	{GO:0005506; iron ion binding; molecular_function GO:0055114; oxidation-reduction process; biological_process GO:0020037; heme binding; molecular_function GO:0016705; oxidoreductase activity, acting on paired donors, with incorporation or reduction of molecular oxygen; molecular_function}	{NA}
A01080	{CONTIG12:1152296:1153043:-}	{gi|238576262|ref|XP_002387973.1|; hypothetical protein [Moniliophthora perniciosa FA553, MPER_13069]}	{NA}	{sla:SERLADRAFT_377243; K01810 GPI, pgi glucose-6-phosphate isomerase 5.3.1.9 }	{NA}	{GO:0006096; glycolysis; biological_process GO:0004347; glucose-6-phosphate isomerase activity; molecular_function GO:0006094; gluconeogenesis; biological_process}	{NA}
A01081	{CONTIG12:1153090:1154272:-}	{gi|568464846|ref|XP_006464042.1|; glucose-6-phosphate isomerase [Agaricus bisporus var. bisporus H97]}	{Q711G1; G6PI_AGABI Glucose-6-phosphate isomerase OS=Agaricus bisporus GN=gpi1 PE=3 SV=1}	{abp:AGABI1DRAFT115547; K01810 GPI, pgi glucose-6-phosphate isomerase 5.3.1.9 }	{SPBC1604.05; KOG2446 Glucose-6-phosphate isomerase G Carbohydrate transport and metabolism ;}	{GO:0004347; glucose-6-phosphate isomerase activity; molecular_function GO:0006096; glycolysis; biological_process GO:0006094; gluconeogenesis; biological_process}	{NA}
A01082	{CONTIG12:1155186:1156658:-}	{gi|597992205|ref|XP_007332498.1|; hypothetical protein [Agaricus bisporus var. burnettii JB137-S8, AGABI1DRAFT_102066]}	{NA}	{abp:AGABI1DRAFT102066; }	{NA}	{GO:0022857; transmembrane transporter activity; molecular_function GO:0055085; transmembrane transport; biological_process GO:0016021; integral to membrane; cellular_component}	{NA}
A01083	{CONTIG12:1158700:1160345:+}	{gi|646306470|gb|KDQ27615.1|; hypothetical protein [Pleurotus ostreatus PC15, PLEOSDRAFT_158507]}	{B9WYE6; VRDA_ASPPA Versiconal hemiacetal acetate reductase OS=Aspergillus parasiticus GN=vrdA PE=1 SV=1}	{cci:CC1G_01923; }	{SPAC977.14c; KOG1575 Voltage-gated shaker-like K+ channel, subunit beta/KCNAB C Energy production and conversion ;}	{NA}	{NA}
A01084	{CONTIG12:1164549:1165153:+}	{gi|597992197|ref|XP_007332496.1|; hypothetical protein [Agaricus bisporus var. burnettii JB137-S8, AGABI1DRAFT_130901]}	{NA}	{abp:AGABI1DRAFT130901; }	{NA}	{NA}	{NA}
A01085	{CONTIG12:1171248:1171970:-}	{gi|597992409|ref|XP_007332545.1|; hypothetical protein [Agaricus bisporus var. burnettii JB137-S8, AGABI1DRAFT_93854]}	{NA}	{abp:AGABI1DRAFT93854; }	{NA}	{GO:0055114; oxidation-reduction process; biological_process GO:0004488; methylenetetrahydrofolate dehydrogenase (NADP+) activity; molecular_function GO:0003824; NA GO:0009396; folic acid-containing compound biosynthetic process; biological_process}	{NA}
A01086	{CONTIG12:1176051:1176784:+}	{NA}	{NA}	{NA}	{NA}	{NA}	{NA}
A01087	{CONTIG12:94336:95668:-}	{gi|568451854|ref|XP_006459741.1|; hypothetical protein [Agaricus bisporus var. bisporus H97, AGABI2DRAFT_202111]}	{NA}	{abv:AGABI2DRAFT202111; K15278 SLC35B4, YEA4 solute carrier family 35 (UDP-xylose/UDP-N-acetylglucosamine transporter), member B4 -- }	{NA}	{GO:0000139; Golgi membrane; cellular_component GO:0016021; integral to membrane; cellular_component GO:0016020; membrane; cellular_component GO:0055085; transmembrane transport; biological_process GO:0005351; sugar:hydrogen symporter activity; molecular_function GO:0008643; carbohydrate transport; biological_process}	{NA}
A01088	{CONTIG12:1177597:1179416:+}	{gi|568464861|ref|XP_006464047.1|; serine proteinase 2 [Agaricus bisporus var. bisporus H97]}	{Q68GV9; ALP_LECPS Alkaline serine protease ver112 OS=Lecanicillium psalliotae PE=1 SV=1}	{abv:AGABI2DRAFT120844; }	{SPAC1006.01; KOG1153 Subtilisin-related protease/Vacuolar protease B O Posttranslational modification, protein turnover, chaperones ;}	{GO:0004252; serine-type endopeptidase activity; molecular_function GO:0006508; proteolysis; biological_process GO:0043086; negative regulation of catalytic activity; biological_process GO:0042802; identical protein binding; molecular_function}	{NA}
A01089	{CONTIG12:1186538:1188916:+}	{gi|597992185|ref|XP_007332494.1|; hypothetical protein [Agaricus bisporus var. burnettii JB137-S8, AGABI1DRAFT_130899]}	{A1CIA7; ORYZ_ASPCL Alkaline protease 1 OS=Aspergillus clavatus (strain ATCC 1007 / CBS 513.65 / DSM 816 / NCTC 3887 / NRRL 1) GN=alp1 PE=3 SV=1}	{abp:AGABI1DRAFT130899; }	{NA}	{GO:0006508; proteolysis; biological_process GO:0004252; serine-type endopeptidase activity; molecular_function GO:0043086; negative regulation of catalytic activity; biological_process GO:0042802; identical protein binding; molecular_function}	{NA}
A01090	{CONTIG12:1189965:1190754:-}	{gi|597992177|ref|XP_007332492.1|; hypothetical protein [Agaricus bisporus var. burnettii JB137-S8, AGABI1DRAFT_115544]}	{NA}	{abp:AGABI1DRAFT115544; }	{NA}	{NA}	{NA}
A01091	{CONTIG12:1192648:1194454:+}	{gi|568464876|ref|XP_006464052.1|; serine proteinase [Agaricus bisporus var. bisporus H97]}	{Q68GV9; ALP_LECPS Alkaline serine protease ver112 OS=Lecanicillium psalliotae PE=1 SV=1}	{abv:AGABI2DRAFT194648; }	{SPAC4A8.04; KOG1153 Subtilisin-related protease/Vacuolar protease B O Posttranslational modification, protein turnover, chaperones ;}	{GO:0006508; proteolysis; biological_process GO:0004252; serine-type endopeptidase activity; molecular_function GO:0043086; negative regulation of catalytic activity; biological_process GO:0042802; identical protein binding; molecular_function}	{NA}
A01092	{CONTIG12:1195318:1200212:-}	{gi|597992165|ref|XP_007332489.1|; hypothetical protein [Agaricus bisporus var. burnettii JB137-S8, AGABI1DRAFT_77978]}	{NA}	{abp:AGABI1DRAFT77978; }	{NA}	{GO:0003723; RNA binding; molecular_function GO:0004386; helicase activity; molecular_function GO:0005524; ATP binding; molecular_function GO:0004525; ribonuclease III activity; molecular_function GO:0006396; RNA processing; biological_process GO:0003677; DNA binding; molecular_function GO:0003676; nucleic acid binding; molecular_function GO:0008026; ATP-dependent helicase activity; molecular_fun…	{NA}
A01093	{CONTIG12:1200784:1201725:-}	{gi|568444841|ref|XP_006457413.1|; hypothetical protein [Agaricus bisporus var. bisporus H97, AGABI2DRAFT_181630]}	{NA}	{abp:AGABI1DRAFT61570; }	{NA}	{NA}	{NA}
A01094	{CONTIG12:1202586:1203507:-}	{gi|568444841|ref|XP_006457413.1|; hypothetical protein [Agaricus bisporus var. bisporus H97, AGABI2DRAFT_181630]}	{C3K630; LAAA_PSEFS L-amino acid amidase OS=Pseudomonas fluorescens (strain SBW25) GN=laaA PE=3 SV=1}	{abp:AGABI1DRAFT61570; }	{NA}	{GO:0016788; hydrolase activity, acting on ester bonds; molecular_function GO:0009058; biosynthetic process; biological_process}	{NA}
A01095	{CONTIG12:1204452:1205190:+}	{gi|568464885|ref|XP_006464055.1|; hypothetical protein [Agaricus bisporus var. bisporus H97, AGABI2DRAFT_194651]}	{NA}	{abv:AGABI2DRAFT194651; }	{NA}	{NA}	{NA}
A01096	{CONTIG12:1208450:1209127:+}	{gi|238604205|ref|XP_002396143.1|; hypothetical protein [Moniliophthora perniciosa FA553, MPER_03685]}	{NA}	{mpr:MPER_03685; }	{NA}	{GO:0030170; pyridoxal phosphate binding; molecular_function}	{NA}
A01097	{CONTIG12:1209597:1211781:+}	{gi|568464894|ref|XP_006464058.1|; hypothetical protein AGABI2DRAFT_180167, partial [Agaricus bisporus var. bisporus H97]}	{NA}	{abp:AGABI1DRAFT62580; }	{NA}	{NA}	{NA}
A01098	{CONTIG12:98431:98799:-}	{gi|568451857|ref|XP_006459742.1|; hypothetical protein [Agaricus bisporus]}	{Q03015; NDUS6_NEUCR NADH-ubiquinone oxidoreductase 12 kDa subunit, mitochondrial OS=Neurospora crassa (strain ATCC 24698 / 74-OR23-1A / CBS 708.71 / DSM 1257 / FGSC 987) GN=nuo-12.3 PE=3 SV=2}	{abp:AGABI1DRAFT55256; }	{NA}	{NA}	{NA}
A01099	{CONTIG12:1213892:1214119:+}	{NA}	{NA}	{NA}	{NA}	{NA}	{NA}
A01100	{CONTIG12:1216844:1225868:-}	{NA}	{NA}	{NA}	{NA}	{NA}	{NA}
A01101	{CONTIG12:1230505:1232655:-}	{gi|568454172|ref|XP_006460513.1|; hypothetical protein [Agaricus bisporus var. bisporus H97, AGABI2DRAFT_68342]}	{NA}	{abv:AGABI2DRAFT68342; }	{NA}	{NA}	{NA}
A01102	{CONTIG12:1236334:1238049:-}	{NA}	{NA}	{NA}	{NA}	{NA}	{NA}
A01103	{CONTIG12:1238938:1240120:-}	{NA}	{NA}	{NA}	{NA}	{NA}	{NA}
A01104	{CONTIG12:1247854:1248395:+}	{gi|568441478|ref|XP_006456292.1|; hypothetical protein [Agaricus bisporus var. bisporus H97, AGABI2DRAFT_122202]}	{NA}	{abv:AGABI2DRAFT122202; }	{NA}	{GO:0006364; rRNA processing; biological_process GO:0008168; methyltransferase activity; molecular_function}	{NA}
A01105	{CONTIG12:1249458:1249834:+}	{gi|597987907|ref|XP_007331464.1|; hypothetical protein [Agaricus bisporus var. burnettii JB137-S8, AGABI1DRAFT_86313]}	{NA}	{abp:AGABI1DRAFT86313; }	{NA}	{NA}	{NA}
A01106	{CONTIG12:1251088:1251878:+}	{gi|568464938|ref|XP_006464072.1|; hypothetical protein [Agaricus bisporus var. bisporus H97, AGABI2DRAFT_180179]}	{NA}	{abv:AGABI2DRAFT180179; }	{NA}	{NA}	{NA}
A01107	{CONTIG12:1253041:1254291:-}	{gi|597992141|ref|XP_007332483.1|; hypothetical protein [Agaricus bisporus var. burnettii JB137-S8, AGABI1DRAFT_130885]}	{NA}	{abp:AGABI1DRAFT130885; }	{NA}	{GO:0005524; ATP binding; molecular_function GO:0016887; ATPase activity; molecular_function}	{NA}
A01108	{CONTIG12:1256649:1258176:-}	{gi|597992137|ref|XP_007332482.1|; hypothetical protein [Agaricus bisporus var. burnettii JB137-S8, AGABI1DRAFT_115535]}	{NA}	{abp:AGABI1DRAFT115535; }	{NA}	{GO:0016810; hydrolase activity, acting on carbon-nitrogen (but not peptide) bonds; molecular_function GO:0005975; carbohydrate metabolic process; biological_process}	{NA}
A01109	{CONTIG12:99701:100529:-}	{gi|599121766|ref|XP_007388051.1|; hypothetical protein [Punctularia strigosozonata HHB-11173 SS5, PUNSTDRAFT_128216]}	{NA}	{NA}	{NA}	{GO:0016998; cell wall macromolecule catabolic process; biological_process}	{NA}
A01110	{CONTIG12:1258531:1259490:+}	{NA}	{NA}	{NA}	{NA}	{NA}	{NA}
A01111	{CONTIG12:1259528:1262848:-}	{gi|568464914|ref|XP_006464064.1|; hypothetical protein [Agaricus bisporus var. bisporus H97, AGABI2DRAFT_209111]}	{NA}	{abv:AGABI2DRAFT209111; K01206 FUCA alpha-L-fucosidase 3.2.1.51 Metabolism; Glycan biosynthesis and metabolism; Other glycan degradation [PATH:ko00511] }	{NA}	{GO:0005975; carbohydrate metabolic process; biological_process GO:0004560; alpha-L-fucosidase activity; molecular_function}	{CCA74278.1_GH29; {PIIN_08231;--;Piriformospora indica (Pirin1);--} &alpha;-L-fucosidase (EC 3.2.1.51); &alpha;-1,3/1,4-L-fucosidase (EC 3.2.1.111) NA}
A01112	{CONTIG12:1268537:1271348:-}	{gi|630206638|ref|XP_007853615.1|; hypothetical protein Moror_11929, partial [Moniliophthora roreri MCA 2997]}	{NA}	{mrr:Moror_16303; }	{NA}	{GO:0006278; RNA-dependent DNA replication; biological_process GO:0003723; RNA binding; molecular_function GO:0003964; RNA-directed DNA polymerase activity; molecular_function}	{NA}
A01113	{CONTIG12:1276125:1277351:-}	{NA}	{NA}	{NA}	{NA}	{NA}	{NA}
A01114	{CONTIG12:1277391:1278512:-}	{NA}	{NA}	{abv:AGABI2DRAFT58703; }	{NA}	{GO:0015074; DNA integration; biological_process}	{NA}
A01115	{CONTIG12:1278957:1280965:-}	{NA}	{NA}	{NA}	{NA}	{GO:0006351; transcription, DNA-dependent; biological_process GO:0003677; DNA binding; molecular_function GO:0003887; DNA-directed DNA polymerase activity; molecular_function}	{NA}
A01116	{CONTIG12:1281084:1281998:+}	{NA}	{NA}	{NA}	{NA}	{GO:0005634; nucleus; cellular_component GO:0008270; zinc ion binding; molecular_function}	{NA}
A01117	{CONTIG12:1282579:1286953:+}	{NA}	{NA}	{NA}	{NA}	{GO:0016407; acetyltransferase activity; molecular_function GO:0003676; nucleic acid binding; molecular_function GO:0003964; RNA-directed DNA polymerase activity; molecular_function GO:0003723; RNA binding; molecular_function GO:0015074; DNA integration; biological_process GO:0008270; zinc ion binding; molecular_function GO:0006278; RNA-dependent DNA replication; biological_process}	{NA}
A01118	{CONTIG12:1288999:1291149:+}	{gi|597966347|ref|XP_007326113.1|; hypothetical protein [Agaricus bisporus var. burnettii JB137-S8, AGABI1DRAFT_35141]}	{NA}	{abp:AGABI1DRAFT35141; }	{NA}	{NA}	{NA}
A01119	{CONTIG12:1291333:1292242:-}	{gi|336362712|gb|EGN91387.1|; hypothetical protein [Serpula lacrymans var. lacrymans S7.3, SERLA73DRAFT_157566]}	{NA}	{NA}	{NA}	{NA}	{NA}
A01120	{CONTIG12:102621:103351:+}	{gi|568451860|ref|XP_006459743.1|; hypothetical protein AGABI2DRAFT_202115, partial [Agaricus bisporus var. bisporus H97]}	{NA}	{abv:AGABI2DRAFT202115; }	{NA}	{GO:0019901; protein kinase binding; molecular_function GO:0000079; regulation of cyclin-dependent protein kinase activity; biological_process}	{NA}
A01121	{CONTIG12:1294139:1298391:+}	{gi|648156636|gb|KDR70412.1|; hypothetical protein [Galerina marginata CBS 339.88, GALMADRAFT_230064]}	{NA}	{lbc:LACBIDRAFT_296687; }	{NA}	{GO:0004674; protein serine/threonine kinase activity; molecular_function GO:0006468; protein phosphorylation; biological_process GO:0005524; ATP binding; molecular_function}	{NA}
A01122	{CONTIG12:1300375:1301521:+}	{gi|568464926|ref|XP_006464068.1|; hypothetical protein [Agaricus bisporus var. bisporus H97, AGABI2DRAFT_194660]}	{NA}	{abv:AGABI2DRAFT194660; }	{NA}	{NA}	{NA}
A01123	{CONTIG12:1307633:1309608:+}	{gi|568459197|ref|XP_006462181.1|; hypothetical protein [Agaricus bisporus var. bisporus H97, AGABI2DRAFT_223428]}	{NA}	{abv:AGABI2DRAFT223428; }	{NA}	{GO:0055085; transmembrane transport; biological_process GO:0042246; tissue regeneration; biological_process GO:0016021; integral to membrane; cellular_component GO:0007155; cell adhesion; biological_process}	{NA}
A01124	{CONTIG12:1310950:1311634:+}	{gi|597992117|ref|XP_007332477.1|; hypothetical protein [Agaricus bisporus var. burnettii JB137-S8, AGABI1DRAFT_108492]}	{NA}	{abp:AGABI1DRAFT108492; }	{NA}	{NA}	{NA}
A01125	{CONTIG12:1314772:1315466:+}	{gi|597992117|ref|XP_007332477.1|; hypothetical protein [Agaricus bisporus var. burnettii JB137-S8, AGABI1DRAFT_108492]}	{NA}	{abp:AGABI1DRAFT108492; }	{NA}	{GO:0019031; viral envelope; cellular_component GO:0019028; viral capsid; cellular_component GO:0005198; NA}	{NA}
A01126	{CONTIG12:1318228:1321550:+}	{gi|568464935|ref|XP_006464071.1|; hypothetical protein AGABI1DRAFT_22321, partial [Agaricus bisporus var. burnettii JB137-S8]}	{NA}	{abp:AGABI1DRAFT22321; }	{NA}	{GO:0005515; protein binding; molecular_function}	{NA}
A01127	{CONTIG12:1323230:1324017:+}	{gi|568464938|ref|XP_006464072.1|; hypothetical protein [Agaricus bisporus var. bisporus H97, AGABI2DRAFT_180179]}	{NA}	{abv:AGABI2DRAFT180179; }	{NA}	{NA}	{NA}
A01128	{CONTIG12:1324666:1326531:+}	{gi|597962907|ref|XP_007324943.1|; hypothetical protein [Agaricus bisporus var. burnettii JB137-S8, AGABI1DRAFT_31991]}	{NA}	{abp:AGABI1DRAFT31991; }	{NA}	{GO:0016021; integral to membrane; cellular_component GO:0022857; transmembrane transporter activity; molecular_function GO:0055085; transmembrane transport; biological_process}	{NA}
A01129	{CONTIG12:1328045:1330171:+}	{gi|597991845|ref|XP_007332411.1|; hypothetical protein [Agaricus bisporus var. burnettii JB137-S8, AGABI1DRAFT_44190]}	{NA}	{abv:AGABI2DRAFT75077; K02510 hpaI, hpcH 4-hydroxy-2-oxoheptanedioate aldolase 4.1.2.52 Metabolism; Amino acid metabolism; Tyrosine metabolism [PATH:ko00350] }	{NA}	{GO:0006725; cellular aromatic compound metabolic process; biological_process GO:0016830; carbon-carbon lyase activity; molecular_function}	{NA}
A01130	{CONTIG12:1332891:1334611:+}	{gi|568464950|ref|XP_006464076.1|; hypothetical protein AGABI2DRAFT_180182, partial [Agaricus bisporus var. bisporus H97]}	{NA}	{abv:AGABI2DRAFT180182; }	{NA}	{GO:0005506; iron ion binding; molecular_function GO:0020037; heme binding; molecular_function GO:0055114; oxidation-reduction process; biological_process GO:0016705; oxidoreductase activity, acting on paired donors, with incorporation or reduction of molecular oxygen; molecular_function}	{NA}
A01131	{CONTIG12:106251:108350:+}	{gi|568451866|ref|XP_006459745.1|; hypothetical protein [Agaricus bisporus var. bisporus H97, AGABI2DRAFT_116696]}	{NA}	{abv:AGABI2DRAFT116696; }	{NA}	{NA}	{NA}
A01132	{CONTIG12:1337503:1338220:+}	{NA}	{NA}	{NA}	{NA}	{NA}	{NA}
A01133	{CONTIG12:1338722:1345354:-}	{gi|568464953|ref|XP_006464077.1|; hypothetical protein [Agaricus bisporus var. bisporus H97, AGABI2DRAFT_180183]}	{NA}	{abv:AGABI2DRAFT180183; }	{NA}	{GO:0043086; negative regulation of catalytic activity; biological_process GO:0042802; identical protein binding; molecular_function GO:0004252; serine-type endopeptidase activity; molecular_function GO:0006508; proteolysis; biological_process}	{NA}
A01134	{CONTIG12:1350813:1352367:+}	{gi|568464965|ref|XP_006464081.1|; hypothetical protein [Agaricus bisporus var. bisporus H97, AGABI2DRAFT_194670]}	{NA}	{abv:AGABI2DRAFT194670; }	{NA}	{NA}	{NA}
A01135	{CONTIG12:1353506:1358230:-}	{gi|597992065|ref|XP_007332465.1|; hypothetical protein [Agaricus bisporus var. burnettii JB137-S8, AGABI1DRAFT_130867]}	{NA}	{abp:AGABI1DRAFT130867; }	{NA}	{GO:0044237; cellular metabolic process; biological_process GO:0003824; NA GO:0008152; NA GO:0050662; coenzyme binding; molecular_function}	{NA}
A01136	{CONTIG12:1360437:1361733:+}	{gi|568464972|ref|XP_006464083.1|; hypothetical protein [Agaricus bisporus var. bisporus H97, AGABI2DRAFT_120874]}	{NA}	{abv:AGABI2DRAFT120874; }	{NA}	{NA}	{NA}
A01137	{CONTIG12:1364275:1365096:-}	{gi|597991879|ref|XP_007332419.1|; hypothetical protein [Agaricus bisporus var. burnettii JB137-S8, AGABI1DRAFT_62547]}	{NA}	{abp:AGABI1DRAFT62547; }	{NA}	{NA}	{NA}
A01138	{CONTIG12:1366048:1367982:+}	{gi|568464978|ref|XP_006464085.1|; beta-tubulin 1 tubb1 [Agaricus bisporus var. bisporus H97]}	{P79008; TBB_COPC7 Tubulin beta chain OS=Coprinopsis cinerea (strain Okayama-7 / 130 / ATCC MYA-4618 / FGSC 9003) GN=CC1G_04743 PE=3 SV=1}	{abv:AGABI2DRAFT187460; K07375 TUBB tubulin beta -- Cellular Processes; Transport and catabolism; Phagosome [PATH:ko04145] Cellular Processes; Cellular community - eukaryotes; Gap junction [PATH:ko04540] Human Diseases; Infectious diseases; Pathogenic Escherichia coli infection [PATH:ko05130] }	{CE00850; KOG1375 Beta tubulin Z Cytoskeleton ;}	{GO:0006184; GTP catabolic process; biological_process GO:0005525; GTP binding; molecular_function GO:0003924; GTPase activity; molecular_function GO:0043234; protein complex; cellular_component GO:0016429; tRNA (adenine-N1-)-methyltransferase activity; molecular_function GO:0051258; protein polymerization; biological_process}	{NA}
A01139	{CONTIG12:1370118:1370521:-}	{NA}	{NA}	{NA}	{NA}	{NA}	{NA}
A01140	{CONTIG12:1371050:1374469:-}	{NA}	{NA}	{NA}	{NA}	{NA}	{NA}
A01141	{CONTIG12:1378725:1379428:-}	{NA}	{NA}	{NA}	{NA}	{GO:0016887; ATPase activity; molecular_function GO:0005524; ATP binding; molecular_function}	{NA}
A01142	{CONTIG12:109057:110346:+}	{gi|568451869|ref|XP_006459746.1|; hypothetical protein [Agaricus bisporus var. bisporus H97, AGABI2DRAFT_191599]}	{NA}	{abv:AGABI2DRAFT191599; }	{NA}	{GO:0005515; protein binding; molecular_function}	{NA}
A01143	{CONTIG12:1380432:1381385:-}	{NA}	{NA}	{mpr:MPER_06102; }	{NA}	{GO:0005515; protein binding; molecular_function}	{NA}
A01144	{CONTIG12:1381754:1382575:+}	{NA}	{NA}	{NA}	{NA}	{NA}	{NA}
A01145	{CONTIG12:1382896:1388106:-}	{gi|597970903|ref|XP_007327331.1|; hypothetical protein [Agaricus bisporus var. burnettii JB137-S8, AGABI1DRAFT_125790]}	{NA}	{abp:AGABI1DRAFT125790; K15192 BTAF1, MOT1 TATA-binding protein-associated factor 3.6.4.- }	{NA}	{GO:0005524; ATP binding; molecular_function GO:0016787; hydrolase activity; molecular_function GO:0004386; helicase activity; molecular_function GO:0003676; nucleic acid binding; molecular_function GO:0003677; DNA binding; molecular_function}	{NA}
A01146	{CONTIG12:1389544:1392282:+}	{gi|597970259|ref|XP_007327174.1|; hypothetical protein [Agaricus bisporus var. burnettii JB137-S8, AGABI1DRAFT_36555]}	{NA}	{abp:AGABI1DRAFT36555; }	{NA}	{GO:0007605; sensory perception of sound; biological_process}	{NA}
A01147	{CONTIG12:1392959:1393606:+}	{NA}	{NA}	{NA}	{NA}	{NA}	{NA}
[truncated: 8,972 more rows]

## Sheet: Table S3
Table S3 CAZy_family identified in A. blazei genome
[truncated: 105 more rows]

[truncated: 5 more sheets: Table S4, Table S5, Table S6, Table S7, Table S8]
